# Supplementary material for: Transcription Analysis of the Stress and Immune Response Genes to Temperature Stress in Ostrinia furnacalis
Source: Front Physiol. 2019 Oct 15;10:1289. doi: 10.3389/fphys.2019.01289 (PMC6803539; doi:10.3389/fphys.2019.01289)
Supplement: Supplementary file 3 [file Data_Sheet_3.xlsx]

## Sheet: Table S4
Table S4. Annotation_Summary
Genes	Gene Length	NR GI	NR ID	NR Score	NR Evalue	NR Description	NT GI	NT ID	NT Score	NT Evalue	NT Description	KO ID	KO Name	KO Description	Http Link	Swissprot ID	Swissprot Score	Swissprot Evalue	Swissprot Description	PFAM ID	PFAM description	Gene Ontology Biological Pathway	BP Description	Gene Ontology Molecular Function	MF Description	Gene Ontology Cellular Component	CC Description	KOG ID	KOG Description
c40810_g1	729	357613083	EHJ68304.1	735	1.72248e-89	hypothetical protein KGM_18135 [Danaus plexippus]	--	--	--	--	--	K12021	TRIM45	tripartite motif-containing protein 45	http://www.genome.jp/dbget-bin/www_bget?ko:K12021	Q5BIM1	278	1.72622e-26	Tripartite motif-containing protein 45 OS=Bos taurus GN=TRIM45 PE=2 SV=1	--	--	--	--	GO:0046872//GO:0008270	metal ion binding//zinc ion binding	GO:0005622	intracellular	--	--
c78961_g1	216	--	--	--	--	--	--	--	--	--	--	--	--	--	--	--	--	--	--	--	--	--	--	--	--	--	--	--	--
c74163_g1	358	--	--	--	--	--	--	--	--	--	--	--	--	--	--	--	--	--	--	--	--	--	--	--	--	--	--	--	--
c38332_g1	500	--	--	--	--	--	--	--	--	--	--	--	--	--	--	--	--	--	--	--	--	--	--	--	--	--	--	--	--
c71006_g1	285	--	--	--	--	--	--	--	--	--	--	--	--	--	--	--	--	--	--	--	--	--	--	--	--	--	--	--	--
c35428_g1	434	357631754	EHJ79223.1	228	3.40488e-20	Meckel syndrome type 1 protein [Danaus plexippus]	--	--	--	--	--	--	--	--	--	--	--	--	--	--	--	--	--	--	--	--	--	--	--
c50116_g1	1477	298204341	ADI61819.1	206	1.49098e-32	endonuclease-reverse transcriptase [Bombyx mori]	134001119	EF113394.1	387	0	Ostrinia furnacalis desaturase (ezi-D11 beta-2) gene, complete cds	--	--	--	--	--	--	--	--	PF12409//PF00078	P5-type ATPase cation transporter//Reverse transcriptase (RNA-dependent DNA polymerase)	GO:0006812//GO:0006278	cation transport//RNA-dependent DNA replication	GO:0003964//GO:0016887//GO:0003723	RNA-directed DNA polymerase activity//ATPase activity//RNA binding	GO:0016021	integral component of membrane	--	--
c60024_g1	217	--	--	--	--	--	--	--	--	--	--	--	--	--	--	--	--	--	--	--	--	--	--	--	--	--	--	--	--
c75641_g1	616	--	--	--	--	--	--	--	--	--	--	--	--	--	--	--	--	--	--	--	--	--	--	--	--	--	--	--	--
c58450_g1	226	--	--	--	--	--	--	--	--	--	--	--	--	--	--	--	--	--	--	--	--	--	--	--	--	--	--	--	--
c46441_g1	3376	357617374	EHJ70751.1	2688	0	helicase [Danaus plexippus]	198463979	XM_002135582.1	453	0	Drosophila pseudoobscura pseudoobscura GA28654 (Dpse\GA28654), mRNA	K11647	SMARCA2_4	SWI/SNF-related matrix-associated actin-dependent regulator of chromatin subfamily A member 2/4	http://www.genome.jp/dbget-bin/www_bget?ko:K11647	P25439	2195	0	ATP-dependent helicase brm OS=Drosophila melanogaster GN=brm PE=1 SV=2	PF00271//PF00176//PF00439	Helicase conserved C-terminal domain//SNF2 family N-terminal domain//Bromodomain	GO:0006355	regulation of transcription, DNA-templated	GO:0005515//GO:0003676//GO:0004386//GO:0003677//GO:0005524	protein binding//nucleic acid binding//helicase activity//DNA binding//ATP binding	GO:0005634	nucleus	KOG0386	Chromatin remodeling complex SWI/SNF, component SWI2 and related ATPases (DNA/RNA helicase superfamily)
c29504_g1	942	--	--	--	--	--	--	--	--	--	--	--	--	--	--	--	--	--	--	--	--	--	--	--	--	--	--	--	--
c49770_g1	2373	512912019	XP_004927554.1	1064	4.15428e-132	PREDICTED: zinc finger protein ubi-d4-like [Bombyx mori]	645010560	XM_008215306.1	129	1.68434e-58	PREDICTED: Nasonia vitripennis zinc finger protein neuro-d4 (LOC100122315), transcript variant X3, mRNA	K13196	DPF2, REQ	zinc finger protein ubi-d4	http://www.genome.jp/dbget-bin/www_bget?ko:K13196	P58268	496	1.5038e-53	Zinc finger protein ubi-d4 OS=Gallus gallus GN=REQ PE=2 SV=1	PF00628	PHD-finger	--	--	GO:0005515	protein binding	--	--	KOG1244	Predicted transcription factor Requiem/NEURO-D4
c52461_g1	4236	357618082	EHJ71176.1	1392	1.42902e-174	hypothetical protein KGM_08650 [Danaus plexippus]	--	--	--	--	--	--	--	--	--	--	--	--	--	PF02465	Flagellar hook-associated protein 2 N-terminus	--	--	--	--	GO:0009424	bacterial-type flagellum hook	--	--
c42561_g1	782	--	--	--	--	--	--	--	--	--	--	--	--	--	--	--	--	--	--	--	--	--	--	--	--	--	--	--	--
c64038_g1	241	--	--	--	--	--	--	--	--	--	--	--	--	--	--	--	--	--	--	--	--	--	--	--	--	--	--	--	--
c60411_g1	381	--	--	--	--	--	--	--	--	--	--	--	--	--	--	--	--	--	--	--	--	--	--	--	--	--	--	--	--
c62994_g1	457	--	--	--	--	--	--	--	--	--	--	--	--	--	--	--	--	--	--	--	--	--	--	--	--	--	--	--	--
c30894_g1	703	--	--	--	--	--	--	--	--	--	--	--	--	--	--	--	--	--	--	--	--	--	--	--	--	--	--	--	--
c88610_g1	259	--	--	--	--	--	--	--	--	--	--	--	--	--	--	--	--	--	--	--	--	--	--	--	--	--	--	--	--
c24180_g1	431	--	--	--	--	--	--	--	--	--	--	--	--	--	--	--	--	--	--	--	--	--	--	--	--	--	--	--	--
c17481_g1	533	--	--	--	--	--	--	--	--	--	--	--	--	--	--	--	--	--	--	--	--	--	--	--	--	--	--	--	--
c54310_g1	488	--	--	--	--	--	--	--	--	--	--	--	--	--	--	--	--	--	--	PF00628	PHD-finger	--	--	GO:0005515	protein binding	--	--	--	--
c51892_g3	389	--	--	--	--	--	--	--	--	--	--	--	--	--	--	--	--	--	--	--	--	--	--	--	--	--	--	--	--
c31866_g1	453	--	--	--	--	--	--	--	--	--	--	--	--	--	--	--	--	--	--	--	--	--	--	--	--	--	--	--	--
c51783_g1	1959	357623418	EHJ74578.1	1109	1.29241e-142	hypothetical protein KGM_21401 [Danaus plexippus]	--	--	--	--	--	K10661	MARCH6, DOA10	E3 ubiquitin-protein ligase MARCH6	http://www.genome.jp/dbget-bin/www_bget?ko:K10661	Q1LVZ2	204	3.00492e-16	E3 ubiquitin-protein ligase MARCH2 OS=Danio rerio GN=march2 PE=2 SV=1	PF13639//PF12906	Ring finger domain//RING-variant domain	--	--	GO:0005515//GO:0008270	protein binding//zinc ion binding	--	--	KOG1609	Protein involved in mRNA turnover and stability
c74129_g1	275	--	--	--	--	--	317574232	HM856623.1	69	3.95794e-26	Ernolatia moorei tyrosine hydroxylase (TH) gene, complete cds	--	--	--	--	--	--	--	--	--	--	--	--	--	--	--	--	--	--
c12666_g1	751	389612337	BAM19670.1	528	2.39926e-61	lysosomal acid lipase, partial [Papilio xuthus]	--	--	--	--	--	--	--	--	--	O46107	337	7.24187e-35	Lipase 1 OS=Drosophila melanogaster GN=Lip1 PE=2 SV=2	PF02450	Lecithin:cholesterol acyltransferase	GO:0006629//GO:0042967	lipid metabolic process//acyl-carrier-protein biosynthetic process	GO:0008374	O-acyltransferase activity	--	--	KOG2624	Triglyceride lipase-cholesterol esterase
c88451_g1	539	--	--	--	--	--	--	--	--	--	--	--	--	--	--	--	--	--	--	--	--	--	--	--	--	--	--	--	--
c20488_g2	392	--	--	--	--	--	--	--	--	--	--	--	--	--	--	--	--	--	--	--	--	--	--	--	--	--	--	--	--
c49898_g2	4685	641659641	XP_008181190.1	918	1.85332e-105	PREDICTED: piggyBac transposable element-derived protein 4-like [Acyrthosiphon pisum]	--	--	--	--	--	--	--	--	--	Q96DM1	536	7.96469e-56	PiggyBac transposable element-derived protein 4 OS=Homo sapiens GN=PGBD4 PE=2 SV=3	PF00130//PF01609//PF02226	Phorbol esters/diacylglycerol binding domain (C1 domain)//Transposase DDE domain//Picornavirus coat protein (VP4)	GO:0006313//GO:0035556	transposition, DNA-mediated//intracellular signal transduction	GO:0004803//GO:0005198//GO:0003677	transposase activity//structural molecule activity//DNA binding	GO:0019028	viral capsid	--	--
c82833_g1	303	--	--	--	--	--	--	--	--	--	--	--	--	--	--	--	--	--	--	--	--	--	--	--	--	--	--	--	--
c58859_g1	262	391873110	EIT82184.1	461	2.99271e-52	WD40 repeat-containing protein [Aspergillus oryzae 3.042] >gi|635514033|gb|KDE85805.1| WD40 repeat-containing protein [Aspergillus oryzae 100-8]	317150508	XM_001824020.2	240	3.27502e-121	Aspergillus oryzae RIB40 WD repeat protein, mRNA	--	--	--	--	Q6LA54	194	8.48395e-17	Uncharacterized WD repeat-containing protein C3H5.08c OS=Schizosaccharomyces pombe (strain 972 / ATCC 24843) GN=SPAC3H5.08c PE=1 SV=2	PF00400	WD domain, G-beta repeat	--	--	GO:0005515	protein binding	--	--	KOG0283	WD40 repeat-containing protein
c52799_g5	1787	641671184	XP_008185493.1	923	1.27611e-115	PREDICTED: putative nuclease HARBI1 [Acyrthosiphon pisum]	--	--	--	--	--	--	--	--	--	Q96MB7	388	4.48121e-40	Putative nuclease HARBI1 OS=Homo sapiens GN=HARBI1 PE=1 SV=1	PF04827//PF01609	Plant transposon protein//Transposase DDE domain	GO:0006313	transposition, DNA-mediated	GO:0004803//GO:0016788//GO:0003677	transposase activity//hydrolase activity, acting on ester bonds//DNA binding	--	--	--	--
c42324_g1	1113	389610361	BAM18792.1	203	9.81869e-17	similar to CG14701 [Papilio xuthus]	390359130	XM_003729369.1	59	6.3613e-20	PREDICTED: Strongylocentrotus purpuratus DPH3 homolog (LOC100893196), mRNA	K15455	KTI11, DPH3	diphthamide biosynthesis protein 3	http://www.genome.jp/dbget-bin/www_bget?ko:K15455	Q9VGQ9	182	3.90845e-15	DPH3 homolog OS=Drosophila melanogaster GN=CG14701 PE=3 SV=1	--	--	--	--	--	--	--	--	KOG2923	Uncharacterized conserved protein
c14144_g1	505	--	--	--	--	--	--	--	--	--	--	--	--	--	--	--	--	--	--	--	--	--	--	--	--	--	--	--	--
c53161_g1	3067	--	--	--	--	--	--	--	--	--	--	--	--	--	--	--	--	--	--	--	--	--	--	--	--	--	--	--	--
c35464_g1	616	--	--	--	--	--	--	--	--	--	--	--	--	--	--	--	--	--	--	--	--	--	--	--	--	--	--	--	--
c51540_g1	3975	512919848	XP_004929485.1	2702	0	PREDICTED: striatin-3-like isoform X1 [Bombyx mori]	512919847	XM_004929428.1	864	0	PREDICTED: Bombyx mori striatin-3-like (LOC101742459), transcript variant X1, mRNA	K17608	STRN1_3_4	striatin 1/3/4	http://www.genome.jp/dbget-bin/www_bget?ko:K17608	Q9ERG2	1029	1.63524e-120	Striatin-3 OS=Mus musculus GN=Strn3 PE=1 SV=1	PF00400	WD domain, G-beta repeat	--	--	GO:0005515	protein binding	--	--	KOG0642	Cell-cycle nuclear protein, contains WD-40 repeats
c76264_g1	318	238482931	XP_002372704.1	548	4.05541e-65	conserved hypothetical protein [Aspergillus flavus NRRL3357] >gi|83765443|dbj|BAE55586.1| unnamed protein product [Aspergillus oryzae RIB40] >gi|220700754|gb|EED57092.1| conserved hypothetical protein [Aspergillus flavus NRRL3357] >gi|391873242|gb|EIT82304.1| synaptic vesicle transporter SVOP [Aspergillus oryzae 3.042] >gi|635504836|gb|KDE76921.1| synaptic vesicle transporter SVOP [Aspergillus or…	83764984	AP007151.1	273	1.83476e-139	Aspergillus oryzae RIB40 DNA, SC005	--	--	--	--	P38124	134	7.32229e-09	Fluconazole resistance protein 1 OS=Saccharomyces cerevisiae (strain ATCC 204508 / S288c) GN=FLR1 PE=1 SV=1	PF07690	Major Facilitator Superfamily	GO:0055085	transmembrane transport	--	--	GO:0016021	integral component of membrane	--	--
c68431_g1	203	--	--	--	--	--	--	--	--	--	--	--	--	--	--	--	--	--	--	--	--	--	--	--	--	--	--	--	--
c57645_g1	256	--	--	--	--	--	--	--	--	--	--	--	--	--	--	--	--	--	--	--	--	--	--	--	--	--	--	--	--
c62363_g1	507	--	--	--	--	--	--	--	--	--	--	--	--	--	--	--	--	--	--	--	--	--	--	--	--	--	--	--	--
c57640_g1	543	641660714	XP_008181589.1	248	2.94456e-21	PREDICTED: uncharacterized protein LOC103308974 [Acyrthosiphon pisum]	--	--	--	--	--	--	--	--	--	--	--	--	--	--	--	--	--	--	--	--	--	--	--
c63299_g1	214	--	--	--	--	--	--	--	--	--	--	--	--	--	--	--	--	--	--	--	--	--	--	--	--	--	--	--	--
c58174_g1	233	--	--	--	--	--	--	--	--	--	--	--	--	--	--	--	--	--	--	--	--	--	--	--	--	--	--	--	--
c82653_g1	202	--	--	--	--	--	--	--	--	--	--	--	--	--	--	--	--	--	--	--	--	--	--	--	--	--	--	--	--
c44556_g1	1141	357628477	EHJ77795.1	521	4.22568e-59	hypothetical protein KGM_20434 [Danaus plexippus]	--	--	--	--	--	--	--	--	--	--	--	--	--	--	--	--	--	--	--	--	--	--	--
c42920_g1	1218	--	--	--	--	--	--	--	--	--	--	--	--	--	--	--	--	--	--	PF00319	SRF-type transcription factor (DNA-binding and dimerisation domain)	--	--	GO:0046983//GO:0003677	protein dimerization activity//DNA binding	--	--	--	--
c26759_g1	401	512925447	XP_004930842.1	187	1.05883e-13	PREDICTED: probable multidrug resistance-associated protein lethal(2)03659-like [Bombyx mori]	--	--	--	--	--	--	--	--	--	P91660	130	5.68598e-08	Probable multidrug resistance-associated protein lethal(2)03659 OS=Drosophila melanogaster GN=l(2)03659 PE=2 SV=3	PF00735//PF01695//PF06414//PF00350//PF05049//PF01926//PF08477//PF00005//PF02421//PF01580//PF04548//PF03193	Septin//IstB-like ATP binding protein//Zeta toxin//Dynamin family//Interferon-inducible GTPase (IIGP)//50S ribosome-binding GTPase//Miro-like protein//ABC transporter//Ferrous iron transport protein B//FtsK/SpoIIIE family//AIG1 family//Protein of unknown function, DUF258	GO:0007059//GO:0007049//GO:0051301//GO:0007264//GO:0015684	chromosome segregation//cell cycle//cell division//small GTPase mediated signal transduction//ferrous iron transport	GO:0005525//GO:0000166//GO:0015093//GO:0005524//GO:0003924//GO:0003677//GO:0016887//GO:0016301//GO:0016817	GTP binding//nucleotide binding//ferrous iron transmembrane transporter activity//ATP binding//GTPase activity//DNA binding//ATPase activity//kinase activity//hydrolase activity, acting on acid anhydrides	GO:0005622//GO:0016021//GO:0016020	intracellular//integral component of membrane//membrane	KOG0054	Multidrug resistance-associated protein/mitoxantrone resistance protein, ABC superfamily
c39287_g1	854	357607178	EHJ65378.1	178	1.16763e-11	hypothetical protein KGM_21374 [Danaus plexippus]	--	--	--	--	--	--	--	--	--	--	--	--	--	--	--	--	--	GO:0003677	DNA binding	--	--	--	--
c55281_g1	2253	512900981	XP_004925023.1	1436	0	PREDICTED: uncharacterized protein LOC101744603 [Bombyx mori]	512900980	XM_004924966.1	130	4.44273e-59	PREDICTED: Bombyx mori uncharacterized LOC101744603 (LOC101744603), mRNA	--	--	--	--	--	--	--	--	--	--	--	--	--	--	--	--	--	--
c57295_g1	434	--	--	--	--	--	--	--	--	--	--	--	--	--	--	--	--	--	--	--	--	--	--	--	--	--	--	--	--
c78408_g1	253	--	--	--	--	--	--	--	--	--	--	--	--	--	--	--	--	--	--	--	--	--	--	--	--	--	--	--	--
c53275_g1	3376	512923558	XP_004930381.1	1088	4.38295e-127	PREDICTED: integrin alpha-IIb-like [Bombyx mori]	--	--	--	--	--	--	--	--	--	Q00651	210	1.86885e-15	Integrin alpha-4 OS=Mus musculus GN=Itga4 PE=1 SV=1	PF03459//PF05767	TOBE domain//Poxvirus virion envelope protein A14	GO:0006810	transport	GO:0005215//GO:0005524//GO:0016820	transporter activity//ATP binding//hydrolase activity, acting on acid anhydrides, catalyzing transmembrane movement of substances	GO:0043190//GO:0019031	ATP-binding cassette (ABC) transporter complex//viral envelope	KOG3637	Vitronectin receptor, alpha subunit
c80495_g1	374	--	--	--	--	--	--	--	--	--	--	--	--	--	--	--	--	--	--	--	--	--	--	--	--	--	--	--	--
c77054_g1	279	--	--	--	--	--	--	--	--	--	--	--	--	--	--	--	--	--	--	--	--	--	--	--	--	--	--	--	--
c61890_g1	550	--	--	--	--	--	--	--	--	--	--	--	--	--	--	--	--	--	--	--	--	--	--	--	--	--	--	--	--
c77599_g1	332	--	--	--	--	--	--	--	--	--	--	--	--	--	--	--	--	--	--	--	--	--	--	--	--	--	--	--	--
c61080_g1	227	512902520	XP_004925395.1	363	2.45781e-38	PREDICTED: metabotropic glutamate receptor 4-like [Bombyx mori]	--	--	--	--	--	K04611	MXR	metabotropic X receptor	http://www.genome.jp/dbget-bin/www_bget?ko:K04611	Q5NCH9	164	5.23972e-13	Metabotropic glutamate receptor 6 OS=Mus musculus GN=Grm6 PE=1 SV=1	--	--	--	--	--	--	--	--	--	--
c74041_g1	413	--	--	--	--	--	--	--	--	--	--	--	--	--	--	--	--	--	--	--	--	--	--	--	--	--	--	--	--
c77542_g1	243	--	--	--	--	--	--	--	--	--	--	--	--	--	--	--	--	--	--	--	--	--	--	--	--	--	--	--	--
c35313_g1	352	--	--	--	--	--	--	--	--	--	--	--	--	--	--	--	--	--	--	--	--	--	--	--	--	--	--	--	--
c72581_g1	202	--	--	--	--	--	--	--	--	--	--	--	--	--	--	--	--	--	--	PF01479	S4 domain	--	--	GO:0003723	RNA binding	--	--	--	--
c73554_g1	223	--	--	--	--	--	--	--	--	--	--	--	--	--	--	--	--	--	--	--	--	--	--	--	--	--	--	--	--
c53011_g1	2598	357628702	EHJ77939.1	525	1.63546e-55	hypothetical protein KGM_15771 [Danaus plexippus]	347969779	XM_314270.5	64	2.50977e-22	Anopheles gambiae str. PEST AGAP003368-PA (AgaP_AGAP003368) mRNA, complete cds	--	--	--	--	--	--	--	--	--	--	--	--	--	--	--	--	--	--
c74940_g1	343	--	--	--	--	--	--	--	--	--	--	--	--	--	--	--	--	--	--	--	--	--	--	--	--	--	--	--	--
c60153_g1	205	--	--	--	--	--	--	--	--	--	--	--	--	--	--	--	--	--	--	--	--	--	--	--	--	--	--	--	--
c40194_g1	1141	--	--	--	--	--	--	--	--	--	--	--	--	--	--	--	--	--	--	--	--	--	--	--	--	--	--	--	--
c88608_g1	214	--	--	--	--	--	--	--	--	--	--	--	--	--	--	--	--	--	--	--	--	--	--	--	--	--	--	--	--
c56595_g1	238	169780712	XP_001824820.1	422	1.14307e-47	subtilisin-like serine protease pepC [Aspergillus oryzae RIB40] >gi|238505092|ref|XP_002383775.1| autophagic serine protease Alp2 [Aspergillus flavus NRRL3357] >gi|83773560|dbj|BAE63687.1| unnamed protein product [Aspergillus oryzae RIB40] >gi|220689889|gb|EED46239.1| autophagic serine protease Alp2 [Aspergillus flavus NRRL3357] >gi|391867129|gb|EIT76379.1| subtilisin-related protease/Vacuolar pr…	317151664	XM_001824768.2	223	8.27183e-112	Aspergillus oryzae RIB40 subtilisin-like serine protease pepC, mRNA	--	--	--	--	P33295	350	5.91732e-39	Subtilisin-like serine protease pepC OS=Aspergillus niger GN=pepC PE=3 SV=1	PF05922//PF04673	Peptidase inhibitor I9//Polyketide synthesis cyclase	GO:0030639//GO:0006508//GO:0043086	polyketide biosynthetic process//proteolysis//negative regulation of catalytic activity	GO:0042802//GO:0004252	identical protein binding//serine-type endopeptidase activity	--	--	--	--
c84307_g1	447	--	--	--	--	--	--	--	--	--	--	--	--	--	--	--	--	--	--	--	--	--	--	--	--	--	--	--	--
c48226_g1	862	--	--	--	--	--	--	--	--	--	--	--	--	--	--	--	--	--	--	--	--	--	--	--	--	--	--	--	--
c12852_g1	205	--	--	--	--	--	--	--	--	--	--	--	--	--	--	--	--	--	--	--	--	--	--	--	--	--	--	--	--
c54762_g4	672	--	--	--	--	--	--	--	--	--	--	--	--	--	--	--	--	--	--	--	--	--	--	--	--	--	--	--	--
c80229_g1	214	--	--	--	--	--	--	--	--	--	--	--	--	--	--	--	--	--	--	--	--	--	--	--	--	--	--	--	--
c32557_g1	738	357625710	EHJ76060.1	280	5.17569e-25	hypothetical protein KGM_12163 [Danaus plexippus]	--	--	--	--	--	--	--	--	--	--	--	--	--	PF00937	Coronavirus nucleocapsid protein	--	--	--	--	GO:0019013	viral nucleocapsid	--	--
c82619_g1	237	--	--	--	--	--	--	--	--	--	--	--	--	--	--	--	--	--	--	--	--	--	--	--	--	--	--	--	--
c46261_g1	3914	395398341	AFN57624.1	1958	0	bestrophin 1b [Spodoptera littoralis]	395398340	JQ968534.1	519	0	Spodoptera littoralis bestrophin 1b mRNA, complete cds	K13881	BEST4, VMD2L2	bestrophin-4	http://www.genome.jp/dbget-bin/www_bget?ko:K13881	Q8NFU0	921	2.10915e-109	Bestrophin-4 OS=Homo sapiens GN=BEST4 PE=2 SV=1	PF03967	Photosynthetic reaction centre, H-chain N-terminal region	GO:0019684//GO:0006118	photosynthesis, light reaction//electron transport	GO:0045156	electron transporter, transferring electrons within the cyclic electron transport pathway of photosynthesis activity	GO:0030077	plasma membrane light-harvesting complex	--	--
c62201_g1	702	217416215	DAA06389.1	616	2.28797e-74	TPA_inf: gustatory receptor 53 [Bombyx mori]	--	--	--	--	--	--	--	--	--	--	--	--	--	PF08395	7tm Chemosensory receptor	GO:0050909	sensory perception of taste	--	--	GO:0016021	integral component of membrane	--	--
c88270_g1	214	--	--	--	--	--	--	--	--	--	--	--	--	--	--	--	--	--	--	--	--	--	--	--	--	--	--	--	--
c77483_g1	217	--	--	--	--	--	--	--	--	--	--	--	--	--	--	--	--	--	--	--	--	--	--	--	--	--	--	--	--
c82062_g1	225	--	--	--	--	--	--	--	--	--	--	--	--	--	--	--	--	--	--	--	--	--	--	--	--	--	--	--	--
c48339_g6	1258	645031366	XP_008210113.1	307	1.48537e-29	PREDICTED: uncharacterized protein LOC103316712 [Nasonia vitripennis]	--	--	--	--	--	--	--	--	--	--	--	--	--	--	--	--	--	--	--	--	--	--	--
c76386_g1	203	--	--	--	--	--	--	--	--	--	--	--	--	--	--	--	--	--	--	--	--	--	--	--	--	--	--	--	--
c46431_g1	848	357615283	EHJ69575.1	192	1.92095e-13	putative spliceosome associated protein [Danaus plexippus]	--	--	--	--	--	--	--	--	--	--	--	--	--	PF00083//PF07690	Sugar (and other) transporter//Major Facilitator Superfamily	GO:0055085	transmembrane transport	GO:0022857	transmembrane transporter activity	GO:0016021	integral component of membrane	KOG0254	Predicted transporter (major facilitator superfamily)
c78677_g1	249	--	--	--	--	--	--	--	--	--	--	--	--	--	--	--	--	--	--	--	--	--	--	--	--	--	--	--	--
c42828_g1	935	--	--	--	--	--	--	--	--	--	--	--	--	--	--	--	--	--	--	--	--	--	--	--	--	--	--	--	--
c11178_g1	245	--	--	--	--	--	--	--	--	--	--	--	--	--	--	--	--	--	--	--	--	--	--	--	--	--	--	--	--
c22345_g1	255	--	--	--	--	--	--	--	--	--	--	--	--	--	--	--	--	--	--	--	--	--	--	--	--	--	--	--	--
c27628_g1	320	--	--	--	--	--	--	--	--	--	--	--	--	--	--	--	--	--	--	--	--	--	--	--	--	--	--	--	--
c69338_g1	271	--	--	--	--	--	--	--	--	--	--	--	--	--	--	--	--	--	--	--	--	--	--	--	--	--	--	--	--
c61527_g1	296	--	--	--	--	--	--	--	--	--	--	--	--	--	--	--	--	--	--	--	--	--	--	--	--	--	--	--	--
c20206_g1	223	--	--	--	--	--	--	--	--	--	--	--	--	--	--	--	--	--	--	--	--	--	--	--	--	--	--	--	--
c39580_g1	1130	--	--	--	--	--	--	--	--	--	--	--	--	--	--	--	--	--	--	PF09169	BRCA2, helical	GO:0000724//GO:0006310	double-strand break repair via homologous recombination//DNA recombination	GO:0003697	single-stranded DNA binding	--	--	--	--
c3563_g1	1006	--	--	--	--	--	--	--	--	--	--	--	--	--	--	--	--	--	--	PF07710	P53 tetramerisation motif	GO:0051262	protein tetramerization	--	--	--	--	--	--
c49319_g1	3134	512921882	XP_004929983.1	2286	0	PREDICTED: tetratricopeptide repeat protein 39B-like [Bombyx mori]	--	--	--	--	--	--	--	--	--	Q95LT8	1007	2.12867e-121	Tetratricopeptide repeat protein 39B OS=Macaca fascicularis GN=TTC39B PE=2 SV=1	PF00515//PF13174	Tetratricopeptide repeat//Tetratricopeptide repeat	--	--	GO:0005515	protein binding	--	--	KOG3783	Uncharacterized conserved protein
c86136_g1	388	--	--	--	--	--	--	--	--	--	--	--	--	--	--	--	--	--	--	--	--	--	--	--	--	--	--	--	--
c12115_g1	311	--	--	--	--	--	--	--	--	--	--	--	--	--	--	--	--	--	--	--	--	--	--	--	--	--	--	--	--
c53579_g1	3584	512926607	XP_004931128.1	4131	0	PREDICTED: V-type proton ATPase 116 kDa subunit a isoform 1-like isoform X1 [Bombyx mori] >gi|512926611|ref|XP_004931129.1| PREDICTED: V-type proton ATPase 116 kDa subunit a isoform 1-like isoform X2 [Bombyx mori]	512926610	XM_004931072.1	1157	0	PREDICTED: Bombyx mori V-type proton ATPase 116 kDa subunit a isoform 1-like (LOC101742516), transcript variant X2, mRNA	K02154	ATPeV0A, ATP6N	V-type H+-transporting ATPase subunit a	http://www.genome.jp/dbget-bin/www_bget?ko:K02154	Q8AVM5	2368	0	V-type proton ATPase 116 kDa subunit a isoform 1 OS=Xenopus laevis GN=atp6v0a1 PE=2 SV=1	PF01496//PF04977//PF01114	V-type ATPase 116kDa subunit family//Septum formation initiator//Colipase, N-terminal domain	GO:0007586//GO:0015991//GO:0016042//GO:0007049//GO:0015992	digestion//ATP hydrolysis coupled proton transport//lipid catabolic process//cell cycle//proton transport	GO:0015078//GO:0008047	hydrogen ion transmembrane transporter activity//enzyme activator activity	GO:0005576//GO:0033179	extracellular region//proton-transporting V-type ATPase, V0 domain	KOG2189	Vacuolar H+-ATPase V0 sector, subunit a
c76039_g1	314	--	--	--	--	--	--	--	--	--	--	--	--	--	--	--	--	--	--	--	--	--	--	--	--	--	--	--	--
c54796_g1	5158	512887257	XP_004921893.1	2320	0	PREDICTED: putative uncharacterized protein DDB_G0282133-like [Bombyx mori]	--	--	--	--	--	--	--	--	--	O88466	239	1.68815e-18	Zinc finger protein 106 OS=Mus musculus GN=Znf106 PE=1 SV=3	PF00400	WD domain, G-beta repeat	--	--	GO:0005515	protein binding	--	--	--	--
c11821_g1	271	--	--	--	--	--	--	--	--	--	--	--	--	--	--	--	--	--	--	--	--	--	--	--	--	--	--	--	--
c51543_g1	450	--	--	--	--	--	--	--	--	--	--	--	--	--	--	--	--	--	--	--	--	--	--	--	--	--	--	--	--
c38725_g1	1007	357615946	EHJ69918.1	174	3.04335e-12	hypothetical protein KGM_17056 [Danaus plexippus]	--	--	--	--	--	--	--	--	--	--	--	--	--	--	--	--	--	--	--	--	--	--	--
c13069_g1	366	--	--	--	--	--	--	--	--	--	--	--	--	--	--	--	--	--	--	--	--	--	--	--	--	--	--	--	--
c68869_g1	287	--	--	--	--	--	--	--	--	--	--	--	--	--	--	--	--	--	--	--	--	--	--	--	--	--	--	--	--
c37163_g1	225	--	--	--	--	--	--	--	--	--	--	--	--	--	--	--	--	--	--	--	--	--	--	--	--	--	--	--	--
c69823_g1	258	--	--	--	--	--	--	--	--	--	--	--	--	--	--	--	--	--	--	--	--	--	--	--	--	--	--	--	--
c45925_g1	1018	--	--	--	--	--	185050002	AP008999.1	39	7.61129e-09	Bombyx mori genomic DNA, chromosome 16, BAC clone:009O16, complete sequence	--	--	--	--	--	--	--	--	--	--	--	--	--	--	--	--	--	--
c58704_g1	333	--	--	--	--	--	--	--	--	--	--	--	--	--	--	--	--	--	--	--	--	--	--	--	--	--	--	--	--
c23939_g1	289	--	--	--	--	--	--	--	--	--	--	--	--	--	--	--	--	--	--	--	--	--	--	--	--	--	--	--	--
c18536_g1	411	--	--	--	--	--	--	--	--	--	--	--	--	--	--	--	--	--	--	--	--	--	--	--	--	--	--	--	--
c86961_g1	303	--	--	--	--	--	--	--	--	--	--	--	--	--	--	--	--	--	--	--	--	--	--	--	--	--	--	--	--
c45529_g1	1556	--	--	--	--	--	--	--	--	--	--	--	--	--	--	--	--	--	--	PF01807	CHC2 zinc finger	GO:0006351//GO:0006269//GO:0006260	transcription, DNA-templated//DNA replication, synthesis of RNA primer//DNA replication	GO:0003896//GO:0003677//GO:0008270	DNA primase activity//DNA binding//zinc ion binding	GO:0005730//GO:0005657	nucleolus//replication fork	--	--
c36831_g1	568	--	--	--	--	--	--	--	--	--	--	--	--	--	--	--	--	--	--	--	--	--	--	--	--	--	--	--	--
c57934_g1	210	--	--	--	--	--	--	--	--	--	--	--	--	--	--	--	--	--	--	--	--	--	--	--	--	--	--	--	--
c69780_g1	280	675368932	KFM61834.1	211	1.8346e-17	RNA-directed DNA polymerase from mobile element jockey, partial [Stegodyphus mimosarum]	--	--	--	--	--	--	--	--	--	Q9NBX4	112	4.2747e-06	Probable RNA-directed DNA polymerase from transposon X-element OS=Drosophila melanogaster GN=X-element\ORF2 PE=3 SV=1	PF00078	Reverse transcriptase (RNA-dependent DNA polymerase)	GO:0006278	RNA-dependent DNA replication	GO:0003723//GO:0003964	RNA binding//RNA-directed DNA polymerase activity	--	--	--	--
c37265_g1	306	--	--	--	--	--	--	--	--	--	--	--	--	--	--	--	--	--	--	--	--	--	--	--	--	--	--	--	--
c36986_g1	330	--	--	--	--	--	--	--	--	--	--	--	--	--	--	--	--	--	--	--	--	--	--	--	--	--	--	--	--
c46991_g1	3744	512915562	XP_004928419.1	624	2.40003e-66	PREDICTED: uncharacterized protein LOC101746992 [Bombyx mori]	--	--	--	--	--	--	--	--	--	Q95SX7	403	2.10704e-38	Probable RNA-directed DNA polymerase from transposon BS OS=Drosophila melanogaster GN=RTase PE=2 SV=1	PF00078	Reverse transcriptase (RNA-dependent DNA polymerase)	GO:0006278	RNA-dependent DNA replication	GO:0003964//GO:0003723	RNA-directed DNA polymerase activity//RNA binding	--	--	KOG1075	FOG: Reverse transcriptase
c12070_g1	201	--	--	--	--	--	--	--	--	--	--	--	--	--	--	--	--	--	--	--	--	--	--	--	--	--	--	--	--
c33663_g1	489	--	--	--	--	--	--	--	--	--	--	--	--	--	--	--	--	--	--	--	--	--	--	--	--	--	--	--	--
c9154_g1	389	--	--	--	--	--	--	--	--	--	--	--	--	--	--	--	--	--	--	--	--	--	--	--	--	--	--	--	--
c76883_g1	238	--	--	--	--	--	--	--	--	--	--	--	--	--	--	--	--	--	--	--	--	--	--	--	--	--	--	--	--
c3356_g1	415	--	--	--	--	--	--	--	--	--	--	--	--	--	--	--	--	--	--	--	--	--	--	--	--	--	--	--	--
c83009_g1	226	--	--	--	--	--	--	--	--	--	--	--	--	--	--	--	--	--	--	--	--	--	--	--	--	--	--	--	--
c48808_g2	2091	--	--	--	--	--	--	--	--	--	--	--	--	--	--	--	--	--	--	--	--	--	--	--	--	--	--	--	--
c80453_g1	251	--	--	--	--	--	--	--	--	--	--	--	--	--	--	--	--	--	--	--	--	--	--	--	--	--	--	--	--
c77676_g1	271	--	--	--	--	--	--	--	--	--	--	--	--	--	--	--	--	--	--	--	--	--	--	--	--	--	--	--	--
c44336_g1	1836	--	--	--	--	--	--	--	--	--	--	--	--	--	--	--	--	--	--	--	--	--	--	--	--	--	--	--	--
c73169_g1	210	--	--	--	--	--	--	--	--	--	--	--	--	--	--	--	--	--	--	--	--	--	--	--	--	--	--	--	--
c13328_g1	398	--	--	--	--	--	--	--	--	--	--	--	--	--	--	--	--	--	--	--	--	--	--	--	--	--	--	--	--
c78121_g1	211	--	--	--	--	--	--	--	--	--	--	--	--	--	--	--	--	--	--	--	--	--	--	--	--	--	--	--	--
c75698_g1	289	--	--	--	--	--	--	--	--	--	--	--	--	--	--	--	--	--	--	--	--	--	--	--	--	--	--	--	--
c40725_g1	486	512938699	XP_004934068.1	618	8.63345e-79	PREDICTED: heat shock protein 70 A2-like, partial [Bombyx mori]	512939074	XM_004934096.1	152	5.35009e-72	PREDICTED: Bombyx mori heat shock protein 70 (Hsp-70), partial mRNA	K03283	HSPA1_8	heat shock 70kDa protein 1/8	http://www.genome.jp/dbget-bin/www_bget?ko:K03283	Q9BIR7	581	7.89292e-70	Major heat shock 70 kDa protein Bc OS=Drosophila melanogaster GN=Hsp70Bc PE=2 SV=2	--	--	--	--	--	--	--	--	KOG0101	Molecular chaperones HSP70/HSC70, HSP70 superfamily
c70905_g1	209	--	--	--	--	--	--	--	--	--	--	--	--	--	--	--	--	--	--	--	--	--	--	--	--	--	--	--	--
c72173_g1	260	--	--	--	--	--	--	--	--	--	--	--	--	--	--	--	--	--	--	--	--	--	--	--	--	--	--	--	--
c6338_g1	277	--	--	--	--	--	--	--	--	--	--	--	--	--	--	--	--	--	--	--	--	--	--	--	--	--	--	--	--
c45302_g1	595	--	--	--	--	--	--	--	--	--	--	--	--	--	--	--	--	--	--	--	--	--	--	--	--	--	--	--	--
c44245_g2	811	--	--	--	--	--	--	--	--	--	--	--	--	--	--	--	--	--	--	--	--	--	--	--	--	--	--	--	--
c87282_g1	206	--	--	--	--	--	--	--	--	--	--	--	--	--	--	--	--	--	--	--	--	--	--	--	--	--	--	--	--
c33769_g1	460	--	--	--	--	--	--	--	--	--	--	--	--	--	--	--	--	--	--	--	--	--	--	--	--	--	--	--	--
c86062_g1	341	--	--	--	--	--	--	--	--	--	--	--	--	--	--	--	--	--	--	--	--	--	--	--	--	--	--	--	--
c46937_g1	1938	682121998	AIN34694.1	1910	0	fatty alcohol acetyltransferase [Agrotis segetum]	--	--	--	--	--	K13515	LPCAT3, MBOAT5	lysophospholipid acyltransferase 5	http://www.genome.jp/dbget-bin/www_bget?ko:K13515	Q9VVX5	875	8.28639e-108	Lysophospholipid acyltransferase 5 OS=Drosophila melanogaster GN=nes PE=1 SV=1	--	--	--	--	--	--	--	--	KOG2705	Predicted membrane protein
c62456_g1	203	--	--	--	--	--	--	--	--	--	--	--	--	--	--	--	--	--	--	--	--	--	--	--	--	--	--	--	--
c46259_g2	214	--	--	--	--	--	--	--	--	--	--	--	--	--	--	--	--	--	--	--	--	--	--	--	--	--	--	--	--
c41093_g1	1041	357630398	EHJ78547.1	333	5.03071e-32	hypothetical protein KGM_10561 [Danaus plexippus]	--	--	--	--	--	--	--	--	--	--	--	--	--	--	--	--	--	--	--	--	--	--	--
c78024_g1	230	--	--	--	--	--	--	--	--	--	--	--	--	--	--	--	--	--	--	--	--	--	--	--	--	--	--	--	--
c28529_g1	204	--	--	--	--	--	--	--	--	--	--	--	--	--	--	--	--	--	--	--	--	--	--	--	--	--	--	--	--
c41777_g1	1650	675366034	KFM58936.1	247	1.21117e-19	hypothetical protein X975_22172, partial [Stegodyphus mimosarum]	--	--	--	--	--	--	--	--	--	--	--	--	--	--	--	--	--	--	--	--	--	--	--
c52424_g1	2642	156546886	NP_001037028.1	564	3.80025e-78	ornithine decarboxylase antizyme [Bombyx mori] >gi|10304393|gb|AAG16235.1|AF291575_1 ornithine decarboxylase antizyme [Bombyx mori]	665506026	NM_001043563.2	256	4.7295e-129	Bombyx mori ornithine decarboxylase antizyme (Antizyme), transcript variant 1, mRNA	K16548	OAZ1	ornithine decarboxylase antizyme 1	http://www.genome.jp/dbget-bin/www_bget?ko:K16548	Q95P51	237	3.44357e-20	Ornithine decarboxylase antizyme OS=Aedes aegypti GN=Oda PE=2 SV=1	PF02100	Ornithine decarboxylase antizyme	GO:0019467//GO:0043086	ornithine catabolic process, by decarboxylation//negative regulation of catalytic activity	GO:0004857//GO:0008073	enzyme inhibitor activity//ornithine decarboxylase inhibitor activity	--	--	--	--
c86479_g1	333	--	--	--	--	--	--	--	--	--	--	--	--	--	--	--	--	--	--	--	--	--	--	--	--	--	--	--	--
c82337_g1	303	--	--	--	--	--	--	--	--	--	--	--	--	--	--	--	--	--	--	--	--	--	--	--	--	--	--	--	--
c42013_g1	471	--	--	--	--	--	--	--	--	--	--	--	--	--	--	--	--	--	--	--	--	--	--	--	--	--	--	--	--
c33799_g1	724	261335920	CBH09300.1	832	1.43732e-104	putative tetratricopeptide repeat protein [Heliconius melpomene]	432956288	XM_004085630.1	41	4.1259e-10	PREDICTED: Oryzias latipes tetratricopeptide repeat protein 26-like (LOC101157670), partial mRNA	--	--	--	--	Q8BS45	538	5.94051e-63	Tetratricopeptide repeat protein 26 OS=Mus musculus GN=Ttc26 PE=2 SV=1	PF00515//PF13181//PF13174//PF13176	Tetratricopeptide repeat//Tetratricopeptide repeat//Tetratricopeptide repeat//Tetratricopeptide repeat	--	--	GO:0005515	protein binding	--	--	--	--
c53192_g2	1829	512903619	XP_004925664.1	364	1.37006e-35	PREDICTED: uncharacterized protein LOC101736398 [Bombyx mori]	--	--	--	--	--	--	--	--	--	--	--	--	--	--	--	--	--	--	--	--	--	--	--
c66845_g1	363	--	--	--	--	--	--	--	--	--	--	--	--	--	--	--	--	--	--	--	--	--	--	--	--	--	--	--	--
c51179_g1	1464	--	--	--	--	--	619325824	FO681381.1	57	1.08942e-18	Spodoptera frugiperda sequence from BAC clone 68E14	--	--	--	--	--	--	--	--	--	--	--	--	--	--	--	--	--	--
c72111_g1	236	--	--	--	--	--	--	--	--	--	--	--	--	--	--	--	--	--	--	--	--	--	--	--	--	--	--	--	--
c81565_g1	217	--	--	--	--	--	--	--	--	--	--	--	--	--	--	--	--	--	--	--	--	--	--	--	--	--	--	--	--
c42914_g1	1899	112983092	NP_001037596.1	610	1.05974e-70	ALY [Bombyx mori] >gi|95115188|gb|ABF55960.1| ALY [Bombyx mori]	383850831	XM_003700930.1	87	2.99022e-35	PREDICTED: Megachile rotundata THO complex subunit 4-like (LOC100882325), mRNA	K12881	THOC4, ALY	THO complex subunit 4	http://www.genome.jp/dbget-bin/www_bget?ko:K12881	Q58EA2	399	1.88231e-42	THO complex subunit 4-A OS=Xenopus laevis GN=alyref-a PE=2 SV=1	PF00076	RNA recognition motif. (a.k.a. RRM, RBD, or RNP domain)	--	--	GO:0000166//GO:0003676	nucleotide binding//nucleic acid binding	--	--	KOG0533	RRM motif-containing protein
c6792_g1	241	--	--	--	--	--	--	--	--	--	--	--	--	--	--	--	--	--	--	--	--	--	--	--	--	--	--	--	--
c75171_g1	242	--	--	--	--	--	--	--	--	--	--	--	--	--	--	--	--	--	--	--	--	--	--	--	--	--	--	--	--
c83897_g1	271	--	--	--	--	--	--	--	--	--	--	--	--	--	--	--	--	--	--	PF03839	Translocation protein Sec62	GO:0015031	protein transport	GO:0008565	protein transporter activity	GO:0016021	integral component of membrane	--	--
c49251_g1	610	449663943	XP_002155195.2	134	9.62315e-07	PREDICTED: transmembrane protein 55A-like [Hydra vulgaris]	--	--	--	--	--	--	--	--	--	--	--	--	--	--	--	--	--	--	--	--	--	--	--
c35658_g1	353	--	--	--	--	--	--	--	--	--	--	--	--	--	--	--	--	--	--	--	--	--	--	--	--	--	--	--	--
c7741_g1	646	--	--	--	--	--	--	--	--	--	--	--	--	--	--	--	--	--	--	--	--	--	--	--	--	--	--	--	--
c12429_g1	774	--	--	--	--	--	--	--	--	--	--	--	--	--	--	--	--	--	--	--	--	--	--	--	--	--	--	--	--
c67693_g1	271	--	--	--	--	--	--	--	--	--	--	--	--	--	--	--	--	--	--	--	--	--	--	--	--	--	--	--	--
c69920_g1	202	--	--	--	--	--	--	--	--	--	--	--	--	--	--	--	--	--	--	--	--	--	--	--	--	--	--	--	--
c61024_g1	208	--	--	--	--	--	--	--	--	--	--	--	--	--	--	--	--	--	--	--	--	--	--	--	--	--	--	--	--
c86784_g1	591	--	--	--	--	--	--	--	--	--	--	--	--	--	--	--	--	--	--	--	--	--	--	--	--	--	--	--	--
c46692_g1	390	--	--	--	--	--	--	--	--	--	--	--	--	--	--	--	--	--	--	--	--	--	--	--	--	--	--	--	--
c71305_g1	222	--	--	--	--	--	--	--	--	--	--	--	--	--	--	--	--	--	--	--	--	--	--	--	--	--	--	--	--
c38647_g1	1160	357630068	EHJ78459.1	323	5.59672e-33	hypothetical protein KGM_16299 [Danaus plexippus]	--	--	--	--	--	--	--	--	--	O42583	223	5.1751e-19	Peripherin-2 OS=Xenopus laevis GN=prph2 PE=2 SV=1	PF00335//PF00895	Tetraspanin family//ATP synthase protein 8	GO:0015986//GO:0015992	ATP synthesis coupled proton transport//proton transport	GO:0015078	hydrogen ion transmembrane transporter activity	GO:0000276//GO:0016021	mitochondrial proton-transporting ATP synthase complex, coupling factor F(o)//integral component of membrane	--	--
c81073_g1	251	--	--	--	--	--	--	--	--	--	--	--	--	--	--	--	--	--	--	--	--	--	--	--	--	--	--	--	--
c28165_g1	357	--	--	--	--	--	--	--	--	--	--	--	--	--	--	--	--	--	--	--	--	--	--	--	--	--	--	--	--
c44442_g1	1092	--	--	--	--	--	--	--	--	--	--	--	--	--	--	--	--	--	--	--	--	--	--	--	--	--	--	--	--
c85160_g1	323	--	--	--	--	--	--	--	--	--	--	--	--	--	--	--	--	--	--	--	--	--	--	--	--	--	--	--	--
c60478_g1	219	--	--	--	--	--	--	--	--	--	--	--	--	--	--	--	--	--	--	--	--	--	--	--	--	--	--	--	--
c57773_g1	265	169778807	XP_001823868.1	469	2.55376e-54	glucokinase [Aspergillus oryzae RIB40] >gi|83772607|dbj|BAE62735.1| unnamed protein product [Aspergillus oryzae RIB40] >gi|391873480|gb|EIT82510.1| hexokinase [Aspergillus oryzae 3.042] >gi|635503151|gb|KDE75293.1| hexokinase [Aspergillus oryzae 100-8]	317150206	XM_001823816.2	238	4.29177e-120	Aspergillus oryzae RIB40 glucokinase, mRNA	K00844	HK	hexokinase	http://www.genome.jp/dbget-bin/www_bget?ko:K00844	Q92407	424	2.49342e-49	Glucokinase OS=Aspergillus niger GN=glkA PE=1 SV=1	PF00349	Hexokinase	GO:0006012//GO:0019872//GO:0005975//GO:0006096//GO:0016310//GO:0005985//GO:0045944//GO:0030437//GO:0046323//GO:0006013//GO:0005982//GO:0051156//GO:0006094	galactose metabolic process//streptomycin biosynthetic process//carbohydrate metabolic process//glycolytic process//phosphorylation//sucrose metabolic process//positive regulation of transcription from RNA polymerase II promoter//ascospore formation//glucose import//mannose metabolic process//starch metabolic process//glucose 6-phosphate metabolic process//gluconeogenesis	GO:0016773//GO:0005524//GO:0004340	phosphotransferase activity, alcohol group as acceptor//ATP binding//glucokinase activity	GO:0005829	cytosol	KOG1369	Hexokinase
c9741_g1	236	--	--	--	--	--	--	--	--	--	--	--	--	--	--	--	--	--	--	--	--	--	--	--	--	--	--	--	--
c52692_g1	4550	512915562	XP_004928419.1	1127	2.79075e-134	PREDICTED: uncharacterized protein LOC101746992 [Bombyx mori]	--	--	--	--	--	--	--	--	--	P21328	372	1.76815e-34	RNA-directed DNA polymerase from mobile element jockey OS=Drosophila melanogaster GN=pol PE=1 SV=1	PF01496//PF00170//PF00078//PF09726//PF07926//PF06160//PF09177	V-type ATPase 116kDa subunit family//bZIP transcription factor//Reverse transcriptase (RNA-dependent DNA polymerase)//Transmembrane protein//TPR/MLP1/MLP2-like protein//Septation ring formation regulator, EzrA//Syntaxin 6, N-terminal	GO:0006606//GO:0000921//GO:0048193//GO:0006355//GO:0015991//GO:0015992//GO:0006278	protein import into nucleus//septin ring assembly//Golgi vesicle transport//regulation of transcription, DNA-templated//ATP hydrolysis coupled proton transport//proton transport//RNA-dependent DNA replication	GO:0015078//GO:0003964//GO:0003723//GO:0043565//GO:0003700	hydrogen ion transmembrane transporter activity//RNA-directed DNA polymerase activity//RNA binding//sequence-specific DNA binding//sequence-specific DNA binding transcription factor activity	GO:0005940//GO:0005667//GO:0016020//GO:0016021//GO:0033179//GO:0005643	septin ring//transcription factor complex//membrane//integral component of membrane//proton-transporting V-type ATPase, V0 domain//nuclear pore	KOG1075	FOG: Reverse transcriptase
c65136_g1	334	--	--	--	--	--	--	--	--	--	--	--	--	--	--	--	--	--	--	PF05026	Dcp2, box A domain	--	--	GO:0003723//GO:0030145//GO:0016787	RNA binding//manganese ion binding//hydrolase activity	--	--	--	--
c47148_g1	4646	357631638	EHJ79107.1	1990	0	hypothetical protein KGM_15580 [Danaus plexippus]	--	--	--	--	--	--	--	--	--	--	--	--	--	--	--	--	--	--	--	--	--	--	--
c38620_g1	976	--	--	--	--	--	--	--	--	--	--	--	--	--	--	--	--	--	--	PF00527	E7 protein, Early protein	GO:0006355	regulation of transcription, DNA-templated	GO:0003700//GO:0003677	sequence-specific DNA binding transcription factor activity//DNA binding	GO:0005667	transcription factor complex	--	--
c36702_g1	320	--	--	--	--	--	--	--	--	--	--	--	--	--	--	--	--	--	--	--	--	--	--	--	--	--	--	--	--
c60262_g1	305	--	--	--	--	--	--	--	--	--	--	--	--	--	--	--	--	--	--	--	--	--	--	--	--	--	--	--	--
c22126_g1	393	--	--	--	--	--	--	--	--	--	--	--	--	--	--	--	--	--	--	--	--	--	--	--	--	--	--	--	--
c24508_g1	204	--	--	--	--	--	--	--	--	--	--	--	--	--	--	--	--	--	--	--	--	--	--	--	--	--	--	--	--
c48034_g1	248	--	--	--	--	--	--	--	--	--	--	--	--	--	--	--	--	--	--	--	--	--	--	--	--	--	--	--	--
c50681_g4	357	--	--	--	--	--	--	--	--	--	--	--	--	--	--	--	--	--	--	--	--	--	--	--	--	--	--	--	--
c2943_g1	221	--	--	--	--	--	--	--	--	--	--	--	--	--	--	--	--	--	--	--	--	--	--	--	--	--	--	--	--
c38449_g1	248	--	--	--	--	--	--	--	--	--	--	--	--	--	--	--	--	--	--	--	--	--	--	--	--	--	--	--	--
c24492_g1	358	--	--	--	--	--	--	--	--	--	--	--	--	--	--	--	--	--	--	--	--	--	--	--	--	--	--	--	--
c65912_g1	229	--	--	--	--	--	--	--	--	--	--	--	--	--	--	--	--	--	--	--	--	--	--	--	--	--	--	--	--
c21775_g1	365	--	--	--	--	--	--	--	--	--	--	--	--	--	--	--	--	--	--	--	--	--	--	--	--	--	--	--	--
c44477_g1	911	--	--	--	--	--	--	--	--	--	--	--	--	--	--	--	--	--	--	--	--	--	--	--	--	--	--	--	--
c42682_g3	251	--	--	--	--	--	--	--	--	--	--	--	--	--	--	--	--	--	--	--	--	--	--	--	--	--	--	--	--
c67267_g1	1594	512907631	XP_004926491.1	847	7.27035e-108	PREDICTED: phosphatidylethanolamine-binding protein homolog F40A3.3-like [Bombyx mori]	346705238	AK377353.1	377	0	Bombyx mori mRNA, clone: fwd-16J20	--	--	--	--	P42678	554	6.52317e-67	Protein translation factor SUI1 homolog OS=Anopheles gambiae GN=AGAP006459 PE=3 SV=1	PF01253	Translation initiation factor SUI1	GO:0006446//GO:0006413	regulation of translational initiation//translational initiation	GO:0003743	translation initiation factor activity	GO:0005840	ribosome	KOG3346	Phosphatidylethanolamine binding protein
c83893_g1	220	--	--	--	--	--	--	--	--	--	--	--	--	--	--	--	--	--	--	--	--	--	--	--	--	--	--	--	--
c27924_g1	441	--	--	--	--	--	--	--	--	--	--	--	--	--	--	--	--	--	--	--	--	--	--	--	--	--	--	--	--
c24816_g1	462	--	--	--	--	--	--	--	--	--	--	--	--	--	--	--	--	--	--	--	--	--	--	--	--	--	--	--	--
c44220_g1	683	223037336	ACM79010.1	193	5.51144e-16	Kunitz protein 8 [Echinococcus granulosus] >gi|576694290|gb|EUB57881.1| Collagen alpha-3(VI) chain [Echinococcus granulosus] >gi|674564666|emb|CDS20984.1| Kunitz protease inhibitor [Echinococcus granulosus]	--	--	--	--	--	--	--	--	--	D8KY58	178	2.00689e-15	Kunitz-type serine protease inhibitor Bt-KTI OS=Bombus terrestris PE=2 SV=1	PF00014	Kunitz/Bovine pancreatic trypsin inhibitor domain	--	--	GO:0004867	serine-type endopeptidase inhibitor activity	--	--	KOG4597	Serine proteinase inhibitor (KU family) with thrombospondin repeats
c44651_g1	1330	--	--	--	--	--	--	--	--	--	--	--	--	--	--	--	--	--	--	--	--	--	--	--	--	--	--	--	--
c3138_g1	360	--	--	--	--	--	--	--	--	--	--	--	--	--	--	--	--	--	--	--	--	--	--	--	--	--	--	--	--
c60179_g1	344	--	--	--	--	--	--	--	--	--	--	--	--	--	--	--	--	--	--	--	--	--	--	--	--	--	--	--	--
c38808_g1	1401	512929583	XP_004931857.1	1594	0	PREDICTED: LOW QUALITY PROTEIN: probable trans-2-enoyl-CoA reductase, mitochondrial-like [Bombyx mori]	346707052	AK385380.1	287	1.45141e-146	Bombyx mori mRNA, clone: e10011O05	K07512	MECR, NRBF1	mitochondrial trans-2-enoyl-CoA reductase	http://www.genome.jp/dbget-bin/www_bget?ko:K07512	Q9V6U9	879	1.3991e-112	Probable trans-2-enoyl-CoA reductase, mitochondrial OS=Drosophila melanogaster GN=CG16935 PE=3 SV=2	PF08240//PF00107	Alcohol dehydrogenase GroES-like domain//Zinc-binding dehydrogenase	GO:0055114	oxidation-reduction process	GO:0016491//GO:0008270	oxidoreductase activity//zinc ion binding	--	--	KOG0025	Zn2+-binding dehydrogenase (nuclear receptor binding factor-1)
c53197_g1	3550	512913241	XP_004927848.1	2426	0	PREDICTED: uncharacterized protein LOC101739504 [Bombyx mori]	--	--	--	--	--	--	--	--	--	A1DWM3	156	4.96701e-09	Major facilitator superfamily domain-containing protein 6 OS=Sus scrofa GN=MFSD6 PE=2 SV=1	PF07690//PF01306	Major Facilitator Superfamily//LacY proton/sugar symporter	GO:0055085//GO:0006810	transmembrane transport//transport	--	--	GO:0016020//GO:0016021	membrane//integral component of membrane	--	--
c34274_g1	500	--	--	--	--	--	--	--	--	--	--	--	--	--	--	--	--	--	--	--	--	--	--	--	--	--	--	--	--
c37425_g1	387	--	--	--	--	--	--	--	--	--	--	--	--	--	--	--	--	--	--	--	--	--	--	--	--	--	--	--	--
c56784_g1	574	--	--	--	--	--	--	--	--	--	--	--	--	--	--	--	--	--	--	--	--	--	--	--	--	--	--	--	--
c79623_g1	294	--	--	--	--	--	--	--	--	--	--	--	--	--	--	--	--	--	--	--	--	--	--	--	--	--	--	--	--
c86632_g1	245	--	--	--	--	--	--	--	--	--	--	--	--	--	--	--	--	--	--	--	--	--	--	--	--	--	--	--	--
c73046_g1	228	--	--	--	--	--	--	--	--	--	--	--	--	--	--	--	--	--	--	--	--	--	--	--	--	--	--	--	--
c49728_g1	1499	--	--	--	--	--	--	--	--	--	--	--	--	--	--	--	--	--	--	--	--	--	--	--	--	--	--	--	--
c6732_g1	331	--	--	--	--	--	--	--	--	--	--	--	--	--	--	--	--	--	--	--	--	--	--	--	--	--	--	--	--
c67263_g1	327	--	--	--	--	--	--	--	--	--	--	--	--	--	--	--	--	--	--	--	--	--	--	--	--	--	--	--	--
c84422_g1	431	--	--	--	--	--	--	--	--	--	--	--	--	--	--	--	--	--	--	--	--	--	--	--	--	--	--	--	--
c53157_g1	376	309401864	ADO79970.1	334	4.60525e-35	phosphoserine aminotransferase [Antheraea pernyi]	--	--	--	--	--	K00831	serC, PSAT1	phosphoserine aminotransferase	http://www.genome.jp/dbget-bin/www_bget?ko:K00831	B5EPR5	194	5.81463e-17	Phosphoserine aminotransferase OS=Acidithiobacillus ferrooxidans (strain ATCC 53993) GN=serC PE=3 SV=1	PF00266	Aminotransferase class-V	GO:0006564//GO:0006566//GO:0006563//GO:0042816//GO:0008152//GO:0006544	L-serine biosynthetic process//threonine metabolic process//L-serine metabolic process//vitamin B6 metabolic process//metabolic process//glycine metabolic process	GO:0004648//GO:0030170	O-phospho-L-serine:2-oxoglutarate aminotransferase activity//pyridoxal phosphate binding	--	--	KOG2790	Phosphoserine aminotransferase
c9361_g1	267	--	--	--	--	--	--	--	--	--	--	--	--	--	--	--	--	--	--	--	--	--	--	--	--	--	--	--	--
c42045_g1	337	--	--	--	--	--	--	--	--	--	--	--	--	--	--	--	--	--	--	--	--	--	--	--	--	--	--	--	--
c10024_g1	408	--	--	--	--	--	--	--	--	--	--	--	--	--	--	--	--	--	--	--	--	--	--	--	--	--	--	--	--
c69311_g1	305	--	--	--	--	--	--	--	--	--	--	--	--	--	--	--	--	--	--	--	--	--	--	--	--	--	--	--	--
c64762_g1	205	--	--	--	--	--	--	--	--	--	--	--	--	--	--	--	--	--	--	--	--	--	--	--	--	--	--	--	--
c57263_g1	315	--	--	--	--	--	--	--	--	--	--	--	--	--	--	--	--	--	--	--	--	--	--	--	--	--	--	--	--
c36195_g1	617	--	--	--	--	--	--	--	--	--	--	--	--	--	--	--	--	--	--	--	--	--	--	--	--	--	--	--	--
c11006_g1	779	--	--	--	--	--	--	--	--	--	--	--	--	--	--	--	--	--	--	--	--	--	--	--	--	--	--	--	--
c54260_g2	531	--	--	--	--	--	--	--	--	--	--	--	--	--	--	--	--	--	--	--	--	--	--	--	--	--	--	--	--
c87544_g1	305	--	--	--	--	--	--	--	--	--	--	--	--	--	--	--	--	--	--	--	--	--	--	--	--	--	--	--	--
c36139_g1	329	--	--	--	--	--	--	--	--	--	--	--	--	--	--	--	--	--	--	--	--	--	--	--	--	--	--	--	--
c4972_g1	341	--	--	--	--	--	--	--	--	--	--	--	--	--	--	--	--	--	--	--	--	--	--	--	--	--	--	--	--
c88034_g1	246	--	--	--	--	--	--	--	--	--	--	--	--	--	--	--	--	--	--	--	--	--	--	--	--	--	--	--	--
c73715_g1	284	--	--	--	--	--	--	--	--	--	--	--	--	--	--	--	--	--	--	--	--	--	--	--	--	--	--	--	--
c4374_g1	258	--	--	--	--	--	--	--	--	--	--	--	--	--	--	--	--	--	--	--	--	--	--	--	--	--	--	--	--
c47766_g1	1581	357621509	EHJ73316.1	1328	4.05602e-176	sodium-dependent phosphate transporter [Danaus plexippus]	--	--	--	--	--	--	--	--	--	O61369	682	6.06835e-81	Putative inorganic phosphate cotransporter OS=Drosophila ananassae GN=Picot PE=3 SV=1	PF07817//PF00083//PF07690	GLE1-like protein//Sugar (and other) transporter//Major Facilitator Superfamily	GO:0016973//GO:0055085	poly(A)+ mRNA export from nucleus//transmembrane transport	GO:0022857	transmembrane transporter activity	GO:0005643//GO:0016021	nuclear pore//integral component of membrane	KOG2532	Permease of the major facilitator superfamily
c53874_g1	4890	357620839	EHJ72882.1	4024	0	putative armadillo protein [Danaus plexippus]	602625126	KJ206237.1	1227	0	Helicoverpa armigera catenin mRNA, complete cds	K02105	CTNNB1	catenin beta 1	http://www.genome.jp/dbget-bin/www_bget?ko:K02105	P18824	3495	0	Armadillo segment polarity protein OS=Drosophila melanogaster GN=arm PE=1 SV=1	PF01602//PF02985//PF00514//PF10508//PF03575	Adaptin N terminal region//HEAT repeat//Armadillo/beta-catenin-like repeat//Proteasome non-ATPase 26S subunit//Peptidase family S51	GO:0006508//GO:0006886//GO:0016192	proteolysis//intracellular protein transport//vesicle-mediated transport	GO:0005515//GO:0044183//GO:0008236	protein binding//protein binding involved in protein folding//serine-type peptidase activity	GO:0030117	membrane coat	KOG4203	Armadillo/beta-Catenin/plakoglobin
c39717_g1	1521	357628386	EHJ77734.1	1668	0	ubiquinol-cytochrome c reductase core protein II [Danaus plexippus]	--	--	--	--	--	K00415	QCR2, UQCRC2	ubiquinol-cytochrome c reductase core subunit 2	http://www.genome.jp/dbget-bin/www_bget?ko:K00415	P22695	576	5.71253e-66	Cytochrome b-c1 complex subunit 2, mitochondrial OS=Homo sapiens GN=UQCRC2 PE=1 SV=3	--	--	GO:0006508	proteolysis	GO:0046872//GO:0008270//GO:0004222	metal ion binding//zinc ion binding//metalloendopeptidase activity	--	--	KOG2583	Ubiquinol cytochrome c reductase, subunit QCR2
c41846_g1	1575	--	--	--	--	--	--	--	--	--	--	--	--	--	--	--	--	--	--	--	--	--	--	--	--	--	--	--	--
c59816_g1	219	--	--	--	--	--	--	--	--	--	--	--	--	--	--	--	--	--	--	--	--	--	--	--	--	--	--	--	--
c30783_g1	315	--	--	--	--	--	--	--	--	--	--	--	--	--	--	--	--	--	--	--	--	--	--	--	--	--	--	--	--
c47838_g1	208	--	--	--	--	--	--	--	--	--	--	--	--	--	--	--	--	--	--	--	--	--	--	--	--	--	--	--	--
c48666_g1	1878	512905088	XP_004925858.1	1813	0	PREDICTED: protein I'm not dead yet-like [Bombyx mori]	--	--	--	--	--	K14445	SLC13A2_3_5	solute carrier family 13 (sodium-dependent dicarboxylate transporter), member 2/3/5	http://www.genome.jp/dbget-bin/www_bget?ko:K14445	Q9VVT2	859	1.38428e-104	Protein I'm not dead yet OS=Drosophila melanogaster GN=Indy PE=1 SV=2	PF03600//PF03485//PF00939	Citrate transporter//Arginyl tRNA synthetase N terminal domain//Sodium:sulfate symporter transmembrane region	GO:0006810//GO:0006814//GO:0006560//GO:0006420//GO:0055085//GO:0006525	transport//sodium ion transport//proline metabolic process//arginyl-tRNA aminoacylation//transmembrane transport//arginine metabolic process	GO:0005524//GO:0004814//GO:0000166//GO:0005215	ATP binding//arginine-tRNA ligase activity//nucleotide binding//transporter activity	GO:0016020//GO:0016021//GO:0005737	membrane//integral component of membrane//cytoplasm	KOG1281	Na+/dicarboxylate, Na+/tricarboxylate and phosphate transporters
c41343_g3	355	307214101	EFN89271.1	127	8.34242e-07	hypothetical protein EAI_01097 [Harpegnathos saltator]	--	--	--	--	--	--	--	--	--	--	--	--	--	--	--	--	--	--	--	--	--	--	--
c69593_g1	201	--	--	--	--	--	--	--	--	--	--	--	--	--	--	--	--	--	--	--	--	--	--	--	--	--	--	--	--
c12403_g1	297	512920777	XP_004929717.1	191	7.23428e-15	PREDICTED: nuclear cap-binding protein subunit 1-like [Bombyx mori]	--	--	--	--	--	--	--	--	--	Q16UN6	137	3.10769e-09	Nuclear cap-binding protein subunit 1 OS=Aedes aegypti GN=Cbp80 PE=3 SV=1	PF09090	MIF4G like	GO:0016070	RNA metabolic process	--	--	--	--	--	--
c35336_g1	827	--	--	--	--	--	--	--	--	--	--	--	--	--	--	--	--	--	--	--	--	--	--	--	--	--	--	--	--
c43246_g1	845	--	--	--	--	--	--	--	--	--	--	--	--	--	--	--	--	--	--	--	--	--	--	--	--	--	--	--	--
c59693_g1	209	--	--	--	--	--	--	--	--	--	--	--	--	--	--	--	--	--	--	--	--	--	--	--	--	--	--	--	--
c63187_g1	269	--	--	--	--	--	--	--	--	--	--	--	--	--	--	--	--	--	--	--	--	--	--	--	--	--	--	--	--
c3975_g1	325	--	--	--	--	--	--	--	--	--	--	--	--	--	--	--	--	--	--	--	--	--	--	--	--	--	--	--	--
c49299_g1	1308	--	--	--	--	--	--	--	--	--	--	--	--	--	--	--	--	--	--	--	--	--	--	--	--	--	--	--	--
c51239_g1	1407	--	--	--	--	--	346714889	AK383460.1	68	8.03753e-25	Bombyx mori mRNA, clone: MFB-07J06	--	--	--	--	--	--	--	--	--	--	--	--	--	--	--	--	--	--
c63294_g1	226	--	--	--	--	--	--	--	--	--	--	--	--	--	--	--	--	--	--	--	--	--	--	--	--	--	--	--	--
c88241_g1	254	--	--	--	--	--	--	--	--	--	--	--	--	--	--	--	--	--	--	--	--	--	--	--	--	--	--	--	--
c74039_g1	214	--	--	--	--	--	--	--	--	--	--	--	--	--	--	--	--	--	--	--	--	--	--	--	--	--	--	--	--
c3346_g1	225	357610146	EHJ66846.1	118	2.07042e-06	atrial natriuretic peptide receptor [Danaus plexippus]	--	--	--	--	--	--	--	--	--	--	--	--	--	--	--	--	--	--	--	--	--	--	--
c62246_g1	472	357615292	EHJ69581.1	187	3.73696e-14	larval cuticle protein LCP-30 precursor [Danaus plexippus]	--	--	--	--	--	--	--	--	--	Q08738	143	3.46407e-10	Larval cuticle protein LCP-30 OS=Bombyx mori GN=LCP30 PE=1 SV=2	PF05109	Herpes virus major outer envelope glycoprotein (BLLF1)	GO:0019058	viral life cycle	GO:0042302	structural constituent of cuticle	GO:0019031	viral envelope	--	--
c86286_g1	226	--	--	--	--	--	--	--	--	--	--	--	--	--	--	--	--	--	--	--	--	--	--	--	--	--	--	--	--
c18589_g1	276	--	--	--	--	--	--	--	--	--	--	--	--	--	--	--	--	--	--	--	--	--	--	--	--	--	--	--	--
c42916_g1	993	--	--	--	--	--	--	--	--	--	--	--	--	--	--	--	--	--	--	--	--	--	--	--	--	--	--	--	--
c86749_g1	208	--	--	--	--	--	--	--	--	--	--	--	--	--	--	--	--	--	--	--	--	--	--	--	--	--	--	--	--
c79934_g1	242	--	--	--	--	--	--	--	--	--	--	--	--	--	--	--	--	--	--	--	--	--	--	--	--	--	--	--	--
c50216_g2	2019	357621711	EHJ73455.1	1397	1.20519e-178	hypothetical protein KGM_01957 [Danaus plexippus]	--	--	--	--	--	K06095	MPDZ, MUPP1, Patj	multiple PDZ domain protein	http://www.genome.jp/dbget-bin/www_bget?ko:K06095	Q9NB04	520	1.32787e-54	Patj homolog OS=Drosophila melanogaster GN=Patj PE=1 SV=2	PF00595//PF13180	PDZ domain (Also known as DHR or GLGF)//PDZ domain	--	--	GO:0005515	protein binding	--	--	KOG3528	FOG: PDZ domain
c50852_g2	311	--	--	--	--	--	--	--	--	--	--	--	--	--	--	--	--	--	--	--	--	--	--	--	--	--	--	--	--
c81790_g1	305	--	--	--	--	--	--	--	--	--	--	--	--	--	--	--	--	--	--	--	--	--	--	--	--	--	--	--	--
c64018_g1	462	--	--	--	--	--	--	--	--	--	--	--	--	--	--	--	--	--	--	--	--	--	--	--	--	--	--	--	--
c56237_g1	904	169780350	XP_001824639.1	747	1.79213e-96	60S ribosomal protein L21 [Aspergillus oryzae RIB40] >gi|238505530|ref|XP_002383987.1| 60S ribosomal protein L21 [Aspergillus flavus NRRL3357] >gi|83773379|dbj|BAE63506.1| unnamed protein product [Aspergillus oryzae RIB40] >gi|220690101|gb|EED46451.1| 60S ribosomal protein L21, putative [Aspergillus flavus NRRL3357] >gi|391863061|gb|EIT72375.1| 60S ribosomal protein [Aspergillus oryzae 3.042] >gi…	317151404	XM_001824587.2	846	0	Aspergillus oryzae RIB40 60S ribosomal protein L21, partial mRNA	K02889	RP-L21e, RPL21	large subunit ribosomal protein L21e	http://www.genome.jp/dbget-bin/www_bget?ko:K02889	Q9UUC1	519	1.20785e-63	60S ribosomal protein L21-A OS=Schizosaccharomyces pombe (strain 972 / ATCC 24843) GN=rpl21a PE=3 SV=1	PF01157//PF01418	Ribosomal protein L21e//Helix-turn-helix domain, rpiR family	GO:0006355//GO:0042254//GO:0006412	regulation of transcription, DNA-templated//ribosome biogenesis//translation	GO:0003700//GO:0003735	sequence-specific DNA binding transcription factor activity//structural constituent of ribosome	GO:0005840//GO:0005667//GO:0005622	ribosome//transcription factor complex//intracellular	KOG1732	60S ribosomal protein L21
c35125_g1	505	--	--	--	--	--	--	--	--	--	--	--	--	--	--	--	--	--	--	--	--	--	--	--	--	--	--	--	--
c73390_g1	221	--	--	--	--	--	--	--	--	--	--	--	--	--	--	--	--	--	--	--	--	--	--	--	--	--	--	--	--
c18073_g1	259	--	--	--	--	--	115312287	AC185959.13	253	1.91801e-128	Glycine max clone gmw1-58k3, complete sequence	--	--	--	--	--	--	--	--	--	--	--	--	--	--	--	--	--	--
c72854_g1	333	--	--	--	--	--	--	--	--	--	--	--	--	--	--	--	--	--	--	--	--	--	--	--	--	--	--	--	--
c76918_g1	244	--	--	--	--	--	--	--	--	--	--	--	--	--	--	--	--	--	--	--	--	--	--	--	--	--	--	--	--
c65124_g1	242	--	--	--	--	--	--	--	--	--	--	--	--	--	--	--	--	--	--	--	--	--	--	--	--	--	--	--	--
c52112_g1	246	--	--	--	--	--	--	--	--	--	--	--	--	--	--	--	--	--	--	--	--	--	--	--	--	--	--	--	--
c77202_g1	327	--	--	--	--	--	--	--	--	--	--	--	--	--	--	--	--	--	--	--	--	--	--	--	--	--	--	--	--
c41359_g1	567	--	--	--	--	--	319918807	AB597004.1	148	1.05534e-69	Ostrinia nubilalis OnubOR5a gene for odorant receptor, complete cds, clone: 11K16	--	--	--	--	--	--	--	--	--	--	--	--	--	--	--	--	--	--
c87058_g1	310	357613599	EHJ68607.1	156	2.58462e-10	hypothetical protein KGM_22021 [Danaus plexippus]	--	--	--	--	--	--	--	--	--	--	--	--	--	--	--	--	--	GO:0043169	cation binding	--	--	--	--
c1058_g1	229	--	--	--	--	--	--	--	--	--	--	--	--	--	--	--	--	--	--	--	--	--	--	--	--	--	--	--	--
c71727_g1	218	--	--	--	--	--	--	--	--	--	--	--	--	--	--	--	--	--	--	--	--	--	--	--	--	--	--	--	--
c35262_g1	384	--	--	--	--	--	--	--	--	--	--	--	--	--	--	--	--	--	--	--	--	--	--	--	--	--	--	--	--
c40546_g1	1720	--	--	--	--	--	--	--	--	--	--	--	--	--	--	--	--	--	--	--	--	--	--	--	--	--	--	--	--
c40612_g1	363	--	--	--	--	--	--	--	--	--	--	--	--	--	--	--	--	--	--	--	--	--	--	--	--	--	--	--	--
c66075_g1	287	--	--	--	--	--	--	--	--	--	--	--	--	--	--	--	--	--	--	--	--	--	--	--	--	--	--	--	--
c44176_g1	667	--	--	--	--	--	--	--	--	--	--	--	--	--	--	--	--	--	--	--	--	--	--	--	--	--	--	--	--
c53374_g1	2403	512886310	XP_004921737.1	2471	0	PREDICTED: cell division cycle protein 20 homolog [Bombyx mori]	346712598	AK382719.1	423	0	Bombyx mori mRNA, clone: fdpe25K24	K03363	CDC20	cell division cycle 20, cofactor of APC complex	http://www.genome.jp/dbget-bin/www_bget?ko:K03363	Q9JJ66	1327	3.32991e-173	Cell division cycle protein 20 homolog OS=Mus musculus GN=Cdc20 PE=1 SV=2	PF00400	WD domain, G-beta repeat	--	--	GO:0005515	protein binding	--	--	KOG0305	Anaphase promoting complex, Cdc20, Cdh1, and Ama1 subunits
c609_g1	387	--	--	--	--	--	--	--	--	--	--	--	--	--	--	--	--	--	--	--	--	--	--	--	--	--	--	--	--
c75727_g1	225	--	--	--	--	--	--	--	--	--	--	--	--	--	--	--	--	--	--	--	--	--	--	--	--	--	--	--	--
c2107_g1	464	--	--	--	--	--	--	--	--	--	--	--	--	--	--	--	--	--	--	--	--	--	--	--	--	--	--	--	--
c60968_g1	301	--	--	--	--	--	--	--	--	--	--	--	--	--	--	--	--	--	--	--	--	--	--	--	--	--	--	--	--
c76804_g1	335	--	--	--	--	--	--	--	--	--	--	--	--	--	--	--	--	--	--	--	--	--	--	--	--	--	--	--	--
c3379_g1	441	--	--	--	--	--	--	--	--	--	--	--	--	--	--	--	--	--	--	--	--	--	--	--	--	--	--	--	--
c3674_g2	501	--	--	--	--	--	--	--	--	--	--	--	--	--	--	--	--	--	--	--	--	--	--	--	--	--	--	--	--
c81873_g1	242	--	--	--	--	--	--	--	--	--	--	--	--	--	--	--	--	--	--	--	--	--	--	--	--	--	--	--	--
c78288_g1	223	--	--	--	--	--	--	--	--	--	--	--	--	--	--	--	--	--	--	PF00789	UBX domain	--	--	GO:0005515	protein binding	--	--	--	--
c81231_g1	228	--	--	--	--	--	--	--	--	--	--	--	--	--	--	--	--	--	--	PF11837	Domain of unknown function (DUF3357)	GO:0006012//GO:0005985//GO:0005982	galactose metabolic process//sucrose metabolic process//starch metabolic process	GO:0004564//GO:0004575	beta-fructofuranosidase activity//sucrose alpha-glucosidase activity	GO:0017177	glucosidase II complex	--	--
c27051_g1	622	--	--	--	--	--	--	--	--	--	--	--	--	--	--	--	--	--	--	--	--	--	--	--	--	--	--	--	--
c73174_g1	513	--	--	--	--	--	--	--	--	--	--	--	--	--	--	--	--	--	--	--	--	--	--	--	--	--	--	--	--
c64184_g1	328	--	--	--	--	--	--	--	--	--	--	--	--	--	--	--	--	--	--	--	--	--	--	--	--	--	--	--	--
c32666_g1	222	--	--	--	--	--	--	--	--	--	--	--	--	--	--	--	--	--	--	--	--	--	--	--	--	--	--	--	--
c32619_g1	379	--	--	--	--	--	--	--	--	--	--	--	--	--	--	--	--	--	--	--	--	--	--	--	--	--	--	--	--
c35028_g2	297	--	--	--	--	--	--	--	--	--	--	--	--	--	--	--	--	--	--	PF00379//PF07701	Insect cuticle protein//Heme NO binding associated	GO:0006144//GO:0046039//GO:0006182	purine nucleobase metabolic process//GTP metabolic process//cGMP biosynthetic process	GO:0042302//GO:0004383	structural constituent of cuticle//guanylate cyclase activity	--	--	--	--
c65651_g1	269	--	--	--	--	--	--	--	--	--	--	--	--	--	--	--	--	--	--	--	--	--	--	--	--	--	--	--	--
c67445_g1	244	--	--	--	--	--	--	--	--	--	--	--	--	--	--	--	--	--	--	PF02723	Non-structural protein NS3/Small envelope protein E	--	--	--	--	GO:0016020	membrane	--	--
c241_g1	359	--	--	--	--	--	--	--	--	--	--	--	--	--	--	--	--	--	--	--	--	--	--	--	--	--	--	--	--
c79741_g1	232	--	--	--	--	--	--	--	--	--	--	--	--	--	--	--	--	--	--	--	--	--	--	--	--	--	--	--	--
c2367_g1	334	--	--	--	--	--	--	--	--	--	--	--	--	--	--	--	--	--	--	--	--	--	--	--	--	--	--	--	--
c77045_g1	201	--	--	--	--	--	--	--	--	--	--	--	--	--	--	--	--	--	--	--	--	--	--	--	--	--	--	--	--
c72907_g1	219	--	--	--	--	--	--	--	--	--	--	--	--	--	--	--	--	--	--	--	--	--	--	--	--	--	--	--	--
c22712_g1	506	512892194	XP_004922871.1	680	1.64147e-79	PREDICTED: multidrug resistance protein homolog 49-like [Bombyx mori]	--	--	--	--	--	--	--	--	--	Q00449	451	4.93912e-50	Multidrug resistance protein homolog 49 OS=Drosophila melanogaster GN=Mdr49 PE=2 SV=2	PF00664	ABC transporter transmembrane region	GO:0006810//GO:0055085	transport//transmembrane transport	GO:0005524//GO:0042626	ATP binding//ATPase activity, coupled to transmembrane movement of substances	GO:0016021	integral component of membrane	KOG0055	Multidrug/pheromone exporter, ABC superfamily
c19556_g1	209	--	--	--	--	--	--	--	--	--	--	--	--	--	--	--	--	--	--	--	--	--	--	--	--	--	--	--	--
c46054_g1	3653	357607521	EHJ65560.1	170	6.49853e-10	hypothetical protein KGM_15150 [Danaus plexippus]	--	--	--	--	--	--	--	--	--	--	--	--	--	--	--	--	--	--	--	--	--	--	--
c56033_g1	6869	512927222	XP_004931281.1	9474	0	PREDICTED: activating signal cointegrator 1 complex subunit 3-like [Bombyx mori]	195501253	XM_002097688.1	223	2.73988e-110	Drosophila yakuba GE24317 (Dyak\GE24317), mRNA	K01529	E3.6.1.-	--	http://www.genome.jp/dbget-bin/www_bget?ko:K01529	F1NTD6	5890	0	Activating signal cointegrator 1 complex subunit 3 OS=Gallus gallus GN=ascc3 PE=3 SV=2	PF00580//PF01695//PF00270//PF04851//PF01032//PF02562//PF00271//PF02133//PF00437	UvrD/REP helicase N-terminal domain//IstB-like ATP binding protein//DEAD/DEAH box helicase//Type III restriction enzyme, res subunit//FecCD transport family//PhoH-like protein//Helicase conserved C-terminal domain//Permease for cytosine/purines, uracil, thiamine, allantoin//Type II/IV secretion system protein	GO:0006810//GO:0015851	transport//nucleobase transport	GO:0005524//GO:0008026//GO:0003676//GO:0004386//GO:0003677//GO:0016787//GO:0015205//GO:0005215	ATP binding//ATP-dependent helicase activity//nucleic acid binding//helicase activity//DNA binding//hydrolase activity//nucleobase transmembrane transporter activity//transporter activity	GO:0016020	membrane	KOG0952	DNA/RNA helicase MER3/SLH1, DEAD-box superfamily
c46103_g1	1397	512927483	XP_004931346.1	1271	2.64504e-170	PREDICTED: regucalcin-like [Bombyx mori]	--	--	--	--	--	K01053	E3.1.1.17, gnl, RGN	gluconolactonase	http://www.genome.jp/dbget-bin/www_bget?ko:K01053	Q06AA3	482	1.69212e-54	Regucalcin OS=Sus scrofa GN=RGN PE=2 SV=1	PF01436	NHL repeat	--	--	GO:0005515	protein binding	--	--	--	--
c57132_g1	259	169781656	XP_001825291.1	405	8.47705e-46	S-adenosylmethionine synthase [Aspergillus oryzae RIB40] >gi|238498450|ref|XP_002380460.1| S-adenosylmethionine synthetase [Aspergillus flavus NRRL3357] >gi|83774033|dbj|BAE64158.1| unnamed protein product [Aspergillus oryzae RIB40] >gi|220693734|gb|EED50079.1| S-adenosylmethionine synthetase [Aspergillus flavus NRRL3357] >gi|391865460|gb|EIT74744.1| S-adenosylmethionine synthetase [Aspergillus o…	317155681	XM_001825239.2	241	8.98701e-122	Aspergillus oryzae RIB40 S-adenosylmethionine synthase, mRNA	K00789	metK	S-adenosylmethionine synthetase	http://www.genome.jp/dbget-bin/www_bget?ko:K00789	P48466	347	6.81843e-39	S-adenosylmethionine synthase OS=Neurospora crassa (strain ATCC 24698 / 74-OR23-1A / CBS 708.71 / DSM 1257 / FGSC 987) GN=eth-1 PE=2 SV=1	PF00438	S-adenosylmethionine synthetase, N-terminal domain	GO:0006730//GO:0006555//GO:0015948//GO:0006556	one-carbon metabolic process//methionine metabolic process//methanogenesis//S-adenosylmethionine biosynthetic process	GO:0004478//GO:0005524//GO:0046872	methionine adenosyltransferase activity//ATP binding//metal ion binding	--	--	KOG1506	S-adenosylmethionine synthetase
c64326_g1	260	--	--	--	--	--	--	--	--	--	--	--	--	--	--	--	--	--	--	--	--	--	--	--	--	--	--	--	--
c5801_g1	277	--	--	--	--	--	--	--	--	--	--	--	--	--	--	--	--	--	--	--	--	--	--	--	--	--	--	--	--
c39585_g1	1220	197209952	NP_001127740.1	1628	0	neuropeptide receptor A5 precursor [Bombyx mori] >gi|195946978|dbj|BAG68403.1| neuropeptide receptor A5 [Bombyx mori]	672390487	JN543509.2	149	6.51456e-70	Schistocerca gregaria putative allatotropin receptor mRNA, complete cds	K04239	HCRTR2	hypocretin (orexin) receptor 2	http://www.genome.jp/dbget-bin/www_bget?ko:K04239	Q9TUP7	662	7.82413e-80	Orexin receptor type 2 OS=Canis familiaris GN=HCRTR2 PE=1 SV=1	PF00001	7 transmembrane receptor (rhodopsin family)	GO:0007218//GO:0007187//GO:0007186	neuropeptide signaling pathway//G-protein coupled receptor signaling pathway, coupled to cyclic nucleotide second messenger//G-protein coupled receptor signaling pathway	GO:0016499//GO:0004930	orexin receptor activity//G-protein coupled receptor activity	GO:0016021	integral component of membrane	KOG3656	FOG: 7 transmembrane receptor
c56144_g1	225	--	--	--	--	--	--	--	--	--	--	--	--	--	--	--	--	--	--	--	--	--	--	--	--	--	--	--	--
c15939_g1	549	512933410	XP_004932785.1	507	1.52021e-58	PREDICTED: cytochrome b-c1 complex subunit 1, mitochondrial-like [Bombyx mori]	--	--	--	--	--	K00414	QCR1, UQCRC1	ubiquinol-cytochrome c reductase core subunit 1	http://www.genome.jp/dbget-bin/www_bget?ko:K00414	P31930	296	4.37278e-30	Cytochrome b-c1 complex subunit 1, mitochondrial OS=Homo sapiens GN=UQCRC1 PE=1 SV=3	--	--	--	--	--	--	--	--	KOG0960	Mitochondrial processing peptidase, beta subunit, and related enzymes (insulinase superfamily)
c84880_g1	721	84801		162	7.15933e-10	hypothetical protein 2 - silkworm transposon mag	--	--	--	--	--	--	--	--	--	--	--	--	--	--	--	--	--	--	--	--	--	--	--
c61301_g1	204	--	--	--	--	--	--	--	--	--	--	--	--	--	--	--	--	--	--	--	--	--	--	--	--	--	--	--	--
c67113_g1	371	--	--	--	--	--	557469708	KF611800.1	371	0	Glycine soja chloroplast, complete genome	--	--	--	--	--	--	--	--	--	--	--	--	--	--	--	--	--	--
c66531_g1	298	--	--	--	--	--	--	--	--	--	--	--	--	--	--	--	--	--	--	--	--	--	--	--	--	--	--	--	--
c69781_g1	255	--	--	--	--	--	--	--	--	--	--	--	--	--	--	--	--	--	--	--	--	--	--	--	--	--	--	--	--
c87308_g1	392	--	--	--	--	--	--	--	--	--	--	--	--	--	--	--	--	--	--	--	--	--	--	--	--	--	--	--	--
c60267_g1	205	--	--	--	--	--	--	--	--	--	--	--	--	--	--	--	--	--	--	--	--	--	--	--	--	--	--	--	--
c60126_g1	299	--	--	--	--	--	--	--	--	--	--	--	--	--	--	--	--	--	--	--	--	--	--	--	--	--	--	--	--
c75358_g1	646	--	--	--	--	--	--	--	--	--	--	--	--	--	--	--	--	--	--	--	--	--	--	--	--	--	--	--	--
c56591_g1	231	--	--	--	--	--	--	--	--	--	--	--	--	--	--	--	--	--	--	--	--	--	--	--	--	--	--	--	--
c38275_g1	235	--	--	--	--	--	--	--	--	--	--	--	--	--	--	--	--	--	--	--	--	--	--	--	--	--	--	--	--
c53336_g1	1344	512888887	XP_004922161.1	658	1.97157e-78	PREDICTED: zinc finger protein 483-like [Bombyx mori]	--	--	--	--	--	K09228	KRAB	KRAB domain-containing zinc finger protein	http://www.genome.jp/dbget-bin/www_bget?ko:K09228	Q91VW9	320	8.2129e-31	Zinc finger protein with KRAB and SCAN domains 3 OS=Mus musculus GN=Zkscan3 PE=2 SV=1	PF00096	Zinc finger, C2H2 type	--	--	GO:0046872	metal ion binding	--	--	KOG1721	FOG: Zn-finger
c55818_g1	4755	512915440	XP_004928390.1	5568	0	PREDICTED: putative ATP-dependent RNA helicase DHX57-like [Bombyx mori]	--	--	--	--	--	--	--	--	--	Q6P158	2658	0	Putative ATP-dependent RNA helicase DHX57 OS=Homo sapiens GN=DHX57 PE=1 SV=2	PF00182//PF00270//PF00642//PF04408//PF00005//PF00437//PF05773//PF00271	Chitinase class I//DEAD/DEAH box helicase//Zinc finger C-x8-C-x5-C-x3-H type (and similar)//Helicase associated domain (HA2)//ABC transporter//Type II/IV secretion system protein//RWD domain//Helicase conserved C-terminal domain	GO:0006810//GO:0006032//GO:0016998	transport//chitin catabolic process//cell wall macromolecule catabolic process	GO:0008026//GO:0003676//GO:0004386//GO:0016887//GO:0004568//GO:0005524//GO:0046872//GO:0005515	ATP-dependent helicase activity//nucleic acid binding//helicase activity//ATPase activity//chitinase activity//ATP binding//metal ion binding//protein binding	--	--	KOG0920	ATP-dependent RNA helicase A
c76679_g1	299	--	--	--	--	--	--	--	--	--	--	--	--	--	--	--	--	--	--	--	--	--	--	--	--	--	--	--	--
c2059_g1	282	--	--	--	--	--	--	--	--	--	--	--	--	--	--	--	--	--	--	--	--	--	--	--	--	--	--	--	--
c50789_g1	3314	567975297	AHC98012.1	1711	0	loquacious [Spodoptera litura]	567975296	KF717087.1	440	0	Spodoptera litura loquacious mRNA, complete cds	K18420	TARBP2	RISC-loading complex subunit TARBP2	http://www.genome.jp/dbget-bin/www_bget?ko:K18420	Q4SS66	417	9.52903e-43	RISC-loading complex subunit tarbp2 OS=Tetraodon nigroviridis GN=tarbp2 PE=3 SV=1	--	--	--	--	--	--	--	--	--	--
c82085_g1	277	--	--	--	--	--	--	--	--	--	--	--	--	--	--	--	--	--	--	--	--	--	--	--	--	--	--	--	--
c21276_g1	808	--	--	--	--	--	--	--	--	--	--	--	--	--	--	--	--	--	--	--	--	--	--	--	--	--	--	--	--
c79975_g1	210	--	--	--	--	--	--	--	--	--	--	--	--	--	--	--	--	--	--	--	--	--	--	--	--	--	--	--	--
c8482_g1	262	--	--	--	--	--	--	--	--	--	--	--	--	--	--	--	--	--	--	--	--	--	--	--	--	--	--	--	--
c78480_g1	279	--	--	--	--	--	--	--	--	--	--	--	--	--	--	--	--	--	--	--	--	--	--	--	--	--	--	--	--
c72263_g1	251	--	--	--	--	--	--	--	--	--	--	--	--	--	--	--	--	--	--	--	--	--	--	--	--	--	--	--	--
c83536_g1	316	--	--	--	--	--	--	--	--	--	--	--	--	--	--	--	--	--	--	--	--	--	--	--	--	--	--	--	--
c78143_g1	212	--	--	--	--	--	--	--	--	--	--	--	--	--	--	--	--	--	--	--	--	--	--	--	--	--	--	--	--
c46485_g1	1989	--	--	--	--	--	--	--	--	--	--	--	--	--	--	--	--	--	--	--	--	--	--	--	--	--	--	--	--
c88091_g1	213	238483623	XP_002373050.1	370	4.41366e-39	glycogen debranching enzyme Gdb1, putative [Aspergillus flavus NRRL3357] >gi|220701100|gb|EED57438.1| glycogen debranching enzyme Gdb1, putative [Aspergillus flavus NRRL3357]	238483622	XM_002373009.1	186	2.68905e-91	Aspergillus flavus NRRL3357 glycogen debranching enzyme Gdb1, putative, mRNA	K01196	AGL	glycogen debranching enzyme	http://www.genome.jp/dbget-bin/www_bget?ko:K01196	Q06625	240	3.95588e-23	Glycogen debranching enzyme OS=Saccharomyces cerevisiae (strain ATCC 204508 / S288c) GN=GDB1 PE=1 SV=1	PF06202	Amylo-alpha-1,6-glucosidase	GO:0005982//GO:0005985//GO:0005978//GO:0005980	starch metabolic process//sucrose metabolic process//glycogen biosynthetic process//glycogen catabolic process	GO:0004134//GO:0004135//GO:0043169	4-alpha-glucanotransferase activity//amylo-alpha-1,6-glucosidase activity//cation binding	GO:0005737	cytoplasm	--	--
c45096_g1	1798	114052000	NP_001040442.1	958	1.34053e-123	Ssu72 RNA polymerase II CTD phosphatase [Bombyx mori] >gi|95102912|gb|ABF51397.1| Ssu72 RNA polymerase II CTD phosphatase [Bombyx mori]	380015136	XM_003691518.1	121	3.55642e-54	PREDICTED: Apis florea RNA polymerase II subunit A C-terminal domain phosphatase SSU72-like (LOC100873000), mRNA	K15544	SSU72	RNA polymerase II subunit A C-terminal domain phosphatase SSU72	http://www.genome.jp/dbget-bin/www_bget?ko:K15544	Q9CY97	647	1.09285e-78	RNA polymerase II subunit A C-terminal domain phosphatase SSU72 OS=Mus musculus GN=Ssu72 PE=2 SV=1	PF04722	Ssu72-like protein	GO:0006470//GO:0006397	protein dephosphorylation//mRNA processing	GO:0004721	phosphoprotein phosphatase activity	GO:0005634	nucleus	KOG2424	Protein involved in transcription start site selection
c65331_g1	272	--	--	--	--	--	--	--	--	--	--	--	--	--	--	--	--	--	--	--	--	--	--	--	--	--	--	--	--
c37158_g1	438	--	--	--	--	--	--	--	--	--	--	--	--	--	--	--	--	--	--	--	--	--	--	--	--	--	--	--	--
c54354_g1	6094	512930601	XP_004932099.1	2088	0	PREDICTED: acetyl-coenzyme A transporter 1-like isoform X1 [Bombyx mori] >gi|512930605|ref|XP_004932100.1| PREDICTED: acetyl-coenzyme A transporter 1-like isoform X2 [Bombyx mori]	--	--	--	--	--	K03372	ACATN, SLC33A1	MFS transporter, PAT family, solute carrier family 33 (acetyl-CoA transportor), member 1	http://www.genome.jp/dbget-bin/www_bget?ko:K03372	Q6AYY8	1197	2.86222e-144	Acetyl-coenzyme A transporter 1 OS=Rattus norvegicus GN=Slc33a1 PE=2 SV=1	PF03032//PF07690//PF13000	Brevenin/esculentin/gaegurin/rugosin family//Major Facilitator Superfamily//Acetyl-coenzyme A transporter 1	GO:0015876//GO:0006952//GO:0042742//GO:0055085	acetyl-CoA transport//defense response//defense response to bacterium//transmembrane transport	GO:0008521	acetyl-CoA transporter activity	GO:0005576//GO:0016021	extracellular region//integral component of membrane	KOG3574	Acetyl-CoA transporter
c80355_g1	223	--	--	--	--	--	--	--	--	--	--	--	--	--	--	--	--	--	--	--	--	--	--	--	--	--	--	--	--
c16643_g1	376	--	--	--	--	--	--	--	--	--	--	--	--	--	--	--	--	--	--	--	--	--	--	--	--	--	--	--	--
c53198_g6	211	--	--	--	--	--	--	--	--	--	--	--	--	--	--	--	--	--	--	--	--	--	--	--	--	--	--	--	--
c83099_g1	528	--	--	--	--	--	557469708	KF611800.1	525	0	Glycine soja chloroplast, complete genome	--	--	--	--	--	--	--	--	--	--	--	--	--	--	--	--	--	--
c78968_g1	1345	389611493	BAM19356.1	1894	0	dusky, partial [Papilio xuthus]	389611492	AK402738.1	498	0	Papilio xuthus mRNA for dusky, partial cds, sequence id: Px-0224, expressed in epidermis	--	--	--	--	Q03755	140	5.79661e-08	Cuticlin-1 OS=Caenorhabditis elegans GN=cut-1 PE=2 SV=2	--	--	--	--	--	--	--	--	--	--
c60316_g1	270	--	--	--	--	--	--	--	--	--	--	--	--	--	--	--	--	--	--	--	--	--	--	--	--	--	--	--	--
c9703_g1	561	--	--	--	--	--	--	--	--	--	--	--	--	--	--	--	--	--	--	--	--	--	--	--	--	--	--	--	--
c38608_g1	1229	332330356	AEE43937.1	233	1.72194e-20	insulin-like precursor polypeptide 2 [Spodoptera littoralis]	--	--	--	--	--	--	--	--	--	P26738	126	1.97703e-07	Bombyxin B-4 OS=Bombyx mori GN=BBXB4 PE=3 SV=1	PF00049//PF03488	Insulin/IGF/Relaxin family//Nematode insulin-related peptide beta type	GO:0007165	signal transduction	GO:0005179	hormone activity	GO:0005576	extracellular region	--	--
c40895_g1	490	--	--	--	--	--	--	--	--	--	--	--	--	--	--	--	--	--	--	--	--	--	--	--	--	--	--	--	--
c43396_g2	302	--	--	--	--	--	--	--	--	--	--	--	--	--	--	--	--	--	--	PF11837	Domain of unknown function (DUF3357)	GO:0005985//GO:0005982//GO:0006012	sucrose metabolic process//starch metabolic process//galactose metabolic process	GO:0004575//GO:0004564	sucrose alpha-glucosidase activity//beta-fructofuranosidase activity	GO:0017177	glucosidase II complex	--	--
c82986_g1	236	--	--	--	--	--	--	--	--	--	--	--	--	--	--	--	--	--	--	--	--	--	--	--	--	--	--	--	--
c57632_g1	278	--	--	--	--	--	--	--	--	--	--	--	--	--	--	--	--	--	--	--	--	--	--	--	--	--	--	--	--
c17655_g1	2149	357628554	EHJ77849.1	1573	0	hypothetical protein KGM_02742 [Danaus plexippus]	644998647	XM_008217014.1	180	6.7912e-87	PREDICTED: Nasonia vitripennis YTH domain-containing protein 1 (LOC100121259), transcript variant X3, mRNA	--	--	--	--	Q96MU7	606	3.6317e-66	YTH domain-containing protein 1 OS=Homo sapiens GN=YTHDC1 PE=1 SV=3	PF11427	Tc3 transposase	--	--	GO:0003677	DNA binding	--	--	KOG1902	Putative signal transduction protein involved in RNA splicing
c88421_g1	262	--	--	--	--	--	--	--	--	--	--	--	--	--	--	--	--	--	--	--	--	--	--	--	--	--	--	--	--
c59241_g1	274	--	--	--	--	--	--	--	--	--	--	--	--	--	--	--	--	--	--	--	--	--	--	--	--	--	--	--	--
c54575_g1	807	443609453	BAM76811.1	1026	6.8179e-132	prophenoloxidase 1 [Mythimna separata]	159141809	DQ841706.2	245	1.82757e-123	Heliothis virescens prophenoloxidase-1 mRNA, complete cds	--	--	--	--	O44249	976	6.77596e-126	Phenoloxidase subunit 1 OS=Manduca sexta PE=1 SV=3	--	--	--	--	--	--	--	--	--	--
c82866_g1	265	--	--	--	--	--	--	--	--	--	--	--	--	--	--	--	--	--	--	--	--	--	--	--	--	--	--	--	--
c8822_g1	275	--	--	--	--	--	--	--	--	--	--	--	--	--	--	--	--	--	--	--	--	--	--	--	--	--	--	--	--
c32240_g1	272	--	--	--	--	--	--	--	--	--	--	--	--	--	--	--	--	--	--	--	--	--	--	--	--	--	--	--	--
c6913_g1	213	--	--	--	--	--	--	--	--	--	--	--	--	--	--	--	--	--	--	--	--	--	--	--	--	--	--	--	--
c5727_g1	341	--	--	--	--	--	--	--	--	--	--	--	--	--	--	--	--	--	--	--	--	--	--	--	--	--	--	--	--
c74648_g1	475	--	--	--	--	--	--	--	--	--	--	--	--	--	--	--	--	--	--	--	--	--	--	--	--	--	--	--	--
c13740_g1	876	--	--	--	--	--	--	--	--	--	--	--	--	--	--	--	--	--	--	--	--	--	--	--	--	--	--	--	--
c40085_g1	579	--	--	--	--	--	--	--	--	--	--	--	--	--	--	--	--	--	--	--	--	--	--	--	--	--	--	--	--
c53424_g1	2047	512896535	XP_004923934.1	1700	0	PREDICTED: kynurenine/alpha-aminoadipate aminotransferase, mitochondrial-like [Bombyx mori]	--	--	--	--	--	K00825	AADAT, KAT2	kynurenine/2-aminoadipate aminotransferase	http://www.genome.jp/dbget-bin/www_bget?ko:K00825	Q5E9N4	848	2.79971e-104	Kynurenine/alpha-aminoadipate aminotransferase, mitochondrial OS=Bos taurus GN=AADAT PE=2 SV=1	PF00155//PF01290//PF01053	Aminotransferase class I and II//Thymosin beta-4 family//Cys/Met metabolism PLP-dependent enzyme	GO:0007010//GO:0009058	cytoskeleton organization//biosynthetic process	GO:0030170//GO:0003779	pyridoxal phosphate binding//actin binding	GO:0005737	cytoplasm	KOG0634	Aromatic amino acid aminotransferase and related proteins
c50315_g3	4136	512926732	XP_004931159.1	1917	0	PREDICTED: protein LMBR1L-like [Bombyx mori]	346707347	AK382109.1	556	0	Bombyx mori mRNA, clone: fdpe07J08	--	--	--	--	Q9D1E5	771	1.73865e-88	Protein LMBR1L OS=Mus musculus GN=Lmbr1l PE=2 SV=1	--	--	--	--	--	--	--	--	KOG3722	Lipocalin-interacting membrane receptor (LIMR)
c17876_g1	596	--	--	--	--	--	--	--	--	--	--	--	--	--	--	--	--	--	--	--	--	--	--	--	--	--	--	--	--
c75537_g1	208	--	--	--	--	--	--	--	--	--	--	--	--	--	--	--	--	--	--	--	--	--	--	--	--	--	--	--	--
c21259_g1	249	--	--	--	--	--	293628543	GQ225762.1	234	6.68848e-118	Ostrinia nubilalis clone BAC 76E13 desaturase ezi-D11 alpha gene, complete cds	--	--	--	--	--	--	--	--	--	--	--	--	--	--	--	--	--	--
c24758_g1	455	--	--	--	--	--	--	--	--	--	--	--	--	--	--	--	--	--	--	--	--	--	--	--	--	--	--	--	--
c83617_g1	336	--	--	--	--	--	--	--	--	--	--	--	--	--	--	--	--	--	--	--	--	--	--	--	--	--	--	--	--
c77869_g1	206	512909041	XP_004926825.1	161	3.19764e-11	PREDICTED: echinoderm microtubule-associated protein-like 1-like [Bombyx mori]	--	--	--	--	--	--	--	--	--	O45487	125	5.45413e-08	Echinoderm microtubule-associated protein-like elp-1 OS=Caenorhabditis elegans GN=elp-1 PE=3 SV=1	--	--	--	--	--	--	--	--	KOG2106	Uncharacterized conserved protein, contains HELP and WD40 domains
c16538_g1	354	--	--	--	--	--	--	--	--	--	--	--	--	--	--	--	--	--	--	--	--	--	--	--	--	--	--	--	--
c58351_g1	249	--	--	--	--	--	--	--	--	--	--	--	--	--	--	--	--	--	--	--	--	--	--	--	--	--	--	--	--
c84612_g1	257	--	--	--	--	--	--	--	--	--	--	--	--	--	--	--	--	--	--	--	--	--	--	--	--	--	--	--	--
c49390_g1	903	--	--	--	--	--	--	--	--	--	--	--	--	--	--	--	--	--	--	--	--	--	--	--	--	--	--	--	--
c18968_g1	473	--	--	--	--	--	--	--	--	--	--	--	--	--	--	--	--	--	--	--	--	--	--	--	--	--	--	--	--
c64435_g1	208	--	--	--	--	--	--	--	--	--	--	--	--	--	--	--	--	--	--	--	--	--	--	--	--	--	--	--	--
c48052_g1	5521	512914346	XP_004928119.1	2032	0	PREDICTED: mucin-17-like [Bombyx mori]	512914345	XM_004928062.1	249	7.74418e-125	PREDICTED: Bombyx mori mucin-17-like (LOC101745825), mRNA	--	--	--	--	--	--	--	--	--	--	--	--	--	--	--	--	--	--
c14595_g1	1131	--	--	--	--	--	--	--	--	--	--	--	--	--	--	--	--	--	--	--	--	--	--	--	--	--	--	--	--
c38161_g1	681	--	--	--	--	--	--	--	--	--	--	--	--	--	--	--	--	--	--	PF02892	BED zinc finger	--	--	GO:0003677	DNA binding	--	--	--	--
c48033_g4	496	--	--	--	--	--	--	--	--	--	--	--	--	--	--	--	--	--	--	--	--	--	--	--	--	--	--	--	--
c69535_g1	285	--	--	--	--	--	--	--	--	--	--	--	--	--	--	--	--	--	--	--	--	--	--	--	--	--	--	--	--
c76405_g1	219	--	--	--	--	--	--	--	--	--	--	--	--	--	--	--	--	--	--	--	--	--	--	--	--	--	--	--	--
c88937_g1	217	--	--	--	--	--	--	--	--	--	--	--	--	--	--	--	--	--	--	--	--	--	--	--	--	--	--	--	--
c72028_g1	213	--	--	--	--	--	--	--	--	--	--	--	--	--	--	--	--	--	--	--	--	--	--	--	--	--	--	--	--
c31799_g1	367	--	--	--	--	--	--	--	--	--	--	--	--	--	--	--	--	--	--	--	--	--	--	--	--	--	--	--	--
c8326_g1	201	--	--	--	--	--	--	--	--	--	--	--	--	--	--	--	--	--	--	--	--	--	--	--	--	--	--	--	--
c70588_g1	324	--	--	--	--	--	--	--	--	--	--	--	--	--	--	--	--	--	--	--	--	--	--	--	--	--	--	--	--
c51948_g1	1032	307191541	EFN75044.1	829	8.90774e-96	Uncharacterized protein KIAA1109 [Camponotus floridanus]	198475617	XM_001357047.2	49	2.1312e-14	Drosophila pseudoobscura pseudoobscura GA18470 (Dpse\GA18470), mRNA	--	--	--	--	A2AAE1	509	6.97379e-55	Uncharacterized protein KIAA1109 OS=Mus musculus GN=Kiaa1109 PE=1 SV=4	--	--	--	--	--	--	--	--	--	--
c33739_g2	273	--	--	--	--	--	--	--	--	--	--	--	--	--	--	--	--	--	--	--	--	--	--	--	--	--	--	--	--
c69131_g1	204	--	--	--	--	--	--	--	--	--	--	--	--	--	--	--	--	--	--	--	--	--	--	--	--	--	--	--	--
c45476_g1	2302	512923547	XP_004930379.1	1991	0	PREDICTED: RNA polymerase I-specific transcription initiation factor RRN3-like isoform X1 [Bombyx mori]	--	--	--	--	--	--	--	--	--	B2RS91	468	3.21848e-48	RNA polymerase I-specific transcription initiation factor RRN3 OS=Mus musculus GN=Rrn3 PE=1 SV=1	--	--	--	--	--	--	--	--	KOG2434	RNA polymerase I transcription factor
c30711_g1	634	--	--	--	--	--	--	--	--	--	--	--	--	--	--	--	--	--	--	--	--	--	--	--	--	--	--	--	--
c27963_g1	259	--	--	--	--	--	--	--	--	--	--	--	--	--	--	--	--	--	--	--	--	--	--	--	--	--	--	--	--
c67455_g1	252	--	--	--	--	--	--	--	--	--	--	--	--	--	--	--	--	--	--	--	--	--	--	--	--	--	--	--	--
c37438_g1	1043	--	--	--	--	--	--	--	--	--	--	--	--	--	--	--	--	--	--	PF09034	TRADD, N-terminal domain	GO:0043123//GO:0007165	positive regulation of I-kappaB kinase/NF-kappaB signaling//signal transduction	GO:0004871//GO:0005515	signal transducer activity//protein binding	--	--	--	--
c88211_g1	264	--	--	--	--	--	--	--	--	--	--	--	--	--	--	--	--	--	--	--	--	--	--	--	--	--	--	--	--
c68314_g1	280	--	--	--	--	--	--	--	--	--	--	--	--	--	--	--	--	--	--	--	--	--	--	--	--	--	--	--	--
c59861_g1	244	--	--	--	--	--	--	--	--	--	--	--	--	--	--	--	--	--	--	--	--	--	--	--	--	--	--	--	--
c64804_g1	236	--	--	--	--	--	--	--	--	--	--	--	--	--	--	--	--	--	--	--	--	--	--	--	--	--	--	--	--
c1245_g1	349	--	--	--	--	--	--	--	--	--	--	--	--	--	--	--	--	--	--	--	--	--	--	--	--	--	--	--	--
c36786_g1	325	--	--	--	--	--	--	--	--	--	--	--	--	--	--	--	--	--	--	--	--	--	--	--	--	--	--	--	--
c8823_g1	236	--	--	--	--	--	--	--	--	--	--	--	--	--	--	--	--	--	--	--	--	--	--	--	--	--	--	--	--
c43660_g1	632	195498490	XP_002096545.1	130	2.4261e-07	GE24989 [Drosophila yakuba] >gi|194182646|gb|EDW96257.1| GE24989 [Drosophila yakuba]	--	--	--	--	--	--	--	--	--	--	--	--	--	--	--	--	--	--	--	--	--	--	--
c81148_g1	326	83774421	BAE64545.1	491	2.16435e-59	unnamed protein product [Aspergillus oryzae RIB40]	238500825	XM_002381606.1	311	1.41748e-160	Aspergillus flavus NRRL3357 alcohol dehydrogenase, putative, mRNA	--	--	--	--	Q9P7F4	134	4.83357e-09	Zinc-type alcohol dehydrogenase-like protein C2E1P3.01 OS=Schizosaccharomyces pombe (strain 972 / ATCC 24843) GN=SPAC2E1P3.01 PE=3 SV=1	PF00107	Zinc-binding dehydrogenase	GO:0055114	oxidation-reduction process	GO:0008270//GO:0000166//GO:0016491	zinc ion binding//nucleotide binding//oxidoreductase activity	--	--	KOG1198	Zinc-binding oxidoreductase
c15387_g1	744	--	--	--	--	--	--	--	--	--	--	--	--	--	--	--	--	--	--	--	--	--	--	--	--	--	--	--	--
c37525_g1	378	--	--	--	--	--	--	--	--	--	--	--	--	--	--	--	--	--	--	--	--	--	--	--	--	--	--	--	--
c19653_g1	363	--	--	--	--	--	--	--	--	--	--	--	--	--	--	--	--	--	--	--	--	--	--	--	--	--	--	--	--
c52949_g1	2782	389610999	BAM19110.1	1767	0	simila to CG8420 [Papilio polytes]	389610998	AK402488.1	253	2.31859e-127	Papilio polytes mRNA for simila to CG8420, complete cds, sequence id: Pp-0335	--	--	--	--	--	--	--	--	--	--	--	--	--	--	--	--	--	--
c61696_g1	468	--	--	--	--	--	--	--	--	--	--	--	--	--	--	--	--	--	--	--	--	--	--	--	--	--	--	--	--
c74144_g1	273	666916249	AIG51919.1	396	2.14331e-44	ionotropic receptor, partial [Helicoverpa armigera]	--	--	--	--	--	--	--	--	--	--	--	--	--	--	--	--	--	--	--	--	--	--	--
c80324_g1	207	--	--	--	--	--	--	--	--	--	--	--	--	--	--	--	--	--	--	--	--	--	--	--	--	--	--	--	--
c58824_g1	256	--	--	--	--	--	--	--	--	--	--	--	--	--	--	--	--	--	--	--	--	--	--	--	--	--	--	--	--
c52717_g1	1868	512897981	XP_004924286.1	1889	0	PREDICTED: sialin-like [Bombyx mori]	512897980	XM_004924229.1	350	0	PREDICTED: Bombyx mori sialin-like (LOC101741241), mRNA	K08193	SLC17A	MFS transporter, ACS family, solute carrier family 17 (sodium-dependent inorganic phosphate cotransporter), other	http://www.genome.jp/dbget-bin/www_bget?ko:K08193	Q9JI12	939	1.77473e-116	Vesicular glutamate transporter 2 OS=Rattus norvegicus GN=Slc17a6 PE=1 SV=1	PF03137//PF05832//PF07690	Organic Anion Transporter Polypeptide (OATP) family//Eukaryotic protein of unknown function (DUF846)//Major Facilitator Superfamily	GO:0006810//GO:0055085	transport//transmembrane transport	GO:0005215	transporter activity	GO:0016020//GO:0016021	membrane//integral component of membrane	KOG2532	Permease of the major facilitator superfamily
c73515_g1	204	--	--	--	--	--	--	--	--	--	--	--	--	--	--	--	--	--	--	--	--	--	--	--	--	--	--	--	--
c28221_g1	494	--	--	--	--	--	--	--	--	--	--	--	--	--	--	--	--	--	--	--	--	--	--	--	--	--	--	--	--
c13203_g1	203	--	--	--	--	--	--	--	--	--	--	--	--	--	--	--	--	--	--	--	--	--	--	--	--	--	--	--	--
c45524_g1	624	--	--	--	--	--	--	--	--	--	--	--	--	--	--	--	--	--	--	--	--	--	--	--	--	--	--	--	--
c45528_g1	2038	512928723	XP_004931648.1	1678	0	PREDICTED: SNF-related serine/threonine-protein kinase-like, partial [Bombyx mori]	512928722	XM_004931591.1	393	0	PREDICTED: Bombyx mori SNF-related serine/threonine-protein kinase-like (LOC101738546), partial mRNA	K08802	SNRK	SNF related kinase	http://www.genome.jp/dbget-bin/www_bget?ko:K08802	Q9NRH2	1363	1.59389e-176	SNF-related serine/threonine-protein kinase OS=Homo sapiens GN=SNRK PE=1 SV=2	PF06293//PF07714//PF00069	Lipopolysaccharide kinase (Kdo/WaaP) family//Protein tyrosine kinase//Protein kinase domain	GO:0006468//GO:0009103	protein phosphorylation//lipopolysaccharide biosynthetic process	GO:0016773//GO:0005524//GO:0004672	phosphotransferase activity, alcohol group as acceptor//ATP binding//protein kinase activity	GO:0016020	membrane	KOG4717	Serine/threonine protein kinase
c84358_g1	252	--	--	--	--	--	--	--	--	--	--	--	--	--	--	--	--	--	--	--	--	--	--	--	--	--	--	--	--
c83287_g1	518	--	--	--	--	--	--	--	--	--	--	--	--	--	--	--	--	--	--	--	--	--	--	--	--	--	--	--	--
c57066_g1	271	--	--	--	--	--	--	--	--	--	--	--	--	--	--	--	--	--	--	--	--	--	--	--	--	--	--	--	--
c53368_g1	2388	357625592	EHJ75991.1	2129	0	hect type E3 ubiquitin ligase [Danaus plexippus]	--	--	--	--	--	--	--	--	--	--	--	--	--	--	--	--	--	GO:0016874	ligase activity	--	--	--	--
c11950_g1	385	--	--	--	--	--	--	--	--	--	--	--	--	--	--	--	--	--	--	--	--	--	--	--	--	--	--	--	--
c38191_g1	535	--	--	--	--	--	--	--	--	--	--	--	--	--	--	--	--	--	--	--	--	--	--	--	--	--	--	--	--
c50707_g1	1999	357609358	EHJ66405.1	2005	0	hypothetical protein KGM_01156 [Danaus plexippus]	--	--	--	--	--	K07178	RIOK1	RIO kinase 1	http://www.genome.jp/dbget-bin/www_bget?ko:K07178	Q9BRS2	1164	1.31357e-149	Serine/threonine-protein kinase RIO1 OS=Homo sapiens GN=RIOK1 PE=1 SV=2	PF09266//PF01163//PF06293//PF03982	Viral DNA topoisomerase I, N-terminal//RIO1 family//Lipopolysaccharide kinase (Kdo/WaaP) family//Diacylglycerol acyltransferase	GO:0009103//GO:0016310//GO:0006265//GO:0009069	lipopolysaccharide biosynthetic process//phosphorylation//DNA topological change//serine family amino acid metabolic process	GO:0003677//GO:0003916//GO:0004674//GO:0003824//GO:0016747//GO:0005524//GO:0016773	DNA binding//DNA topoisomerase activity//protein serine/threonine kinase activity//catalytic activity//transferase activity, transferring acyl groups other than amino-acyl groups//ATP binding//phosphotransferase activity, alcohol group as acceptor	GO:0016020	membrane	KOG2270	Serine/threonine protein kinase involved in cell cycle control
c57988_g1	207	--	--	--	--	--	--	--	--	--	--	--	--	--	--	--	--	--	--	--	--	--	--	--	--	--	--	--	--
c51338_g1	1026	--	--	--	--	--	--	--	--	--	--	--	--	--	--	--	--	--	--	--	--	--	--	--	--	--	--	--	--
c51563_g3	221	--	--	--	--	--	169798411	EU350086.1	142	8.08813e-67	Ostrinia nubilalis sex male acyl-CoA delta-14 desaturase mRNA, complete cds	--	--	--	--	--	--	--	--	--	--	--	--	--	--	--	--	--	--
c54855_g1	3027	357603425	EHJ63755.1	3380	0	hypothetical protein KGM_03160 [Danaus plexippus]	--	--	--	--	--	K04920	KCNK10	potassium channel subfamily K member 10	http://www.genome.jp/dbget-bin/www_bget?ko:K04920	Q94526	872	8.74485e-99	Open rectifier potassium channel protein 1 OS=Drosophila melanogaster GN=Ork1 PE=1 SV=2	PF00520//PF05225	Ion transport protein//helix-turn-helix, Psq domain	GO:0006811//GO:0055085	ion transport//transmembrane transport	GO:0003677//GO:0005216	DNA binding//ion channel activity	GO:0016020	membrane	KOG1418	Tandem pore domain K+ channel
c76109_g1	266	--	--	--	--	--	--	--	--	--	--	--	--	--	--	--	--	--	--	--	--	--	--	--	--	--	--	--	--
c44571_g2	2379	357616582	EHJ70270.1	1346	4.49857e-176	putative JmjC domain-containing protein 5 [Danaus plexippus]	--	--	--	--	--	--	--	--	--	Q497B8	752	2.95983e-89	Lysine-specific demethylase 8 OS=Rattus norvegicus GN=Kdm8 PE=2 SV=1	PF04670//PF08007//PF02373	Gtr1/RagA G protein conserved region//Cupin superfamily protein//JmjC domain, hydroxylase	--	--	GO:0005525//GO:0005515	GTP binding//protein binding	GO:0005634//GO:0005737	nucleus//cytoplasm	KOG2132	Uncharacterized conserved protein, contains JmjC domain
c59226_g1	248	--	--	--	--	--	--	--	--	--	--	--	--	--	--	--	--	--	--	--	--	--	--	--	--	--	--	--	--
c75660_g1	220	--	--	--	--	--	--	--	--	--	--	--	--	--	--	--	--	--	--	--	--	--	--	--	--	--	--	--	--
c88097_g1	260	--	--	--	--	--	--	--	--	--	--	--	--	--	--	--	--	--	--	--	--	--	--	--	--	--	--	--	--
c9324_g1	223	--	--	--	--	--	--	--	--	--	--	--	--	--	--	--	--	--	--	--	--	--	--	--	--	--	--	--	--
c44792_g1	1515	--	--	--	--	--	--	--	--	--	--	--	--	--	--	--	--	--	--	--	--	--	--	--	--	--	--	--	--
c78911_g1	302	--	--	--	--	--	--	--	--	--	--	--	--	--	--	--	--	--	--	--	--	--	--	--	--	--	--	--	--
c54058_g1	1528	25989209	AAL31706.1	559	8.43233e-61	coagulation factor-like protein 3 [Hyphantria cunea]	--	--	--	--	--	--	--	--	--	B5U2W0	378	6.54517e-39	Venom serine protease Bi-VSP OS=Bombus ignitus PE=1 SV=1	PF00089	Trypsin	GO:0006508	proteolysis	GO:0003824//GO:0004252	catalytic activity//serine-type endopeptidase activity	--	--	KOG3627	Trypsin
c34158_g1	1596	--	--	--	--	--	--	--	--	--	--	--	--	--	--	--	--	--	--	--	--	--	--	--	--	--	--	--	--
c52759_g1	3207	512889452	XP_004922281.1	2448	0	PREDICTED: regulator of G-protein signaling 7-like [Bombyx mori]	347970476	XM_310248.7	161	3.7172e-76	Anopheles gambiae str. PEST AGAP003718-PA (AgaP_AGAP003718) mRNA, complete cds	K16449	RGS	regulator of G-protein signaling	http://www.genome.jp/dbget-bin/www_bget?ko:K16449	Q9Z2H2	1307	3.04732e-167	Regulator of G-protein signaling 6 OS=Mus musculus GN=Rgs6 PE=1 SV=2	PF00615//PF09174//PF02558//PF00631//PF00610//PF11801	Regulator of G protein signaling domain//Maf1 regulator//Ketopantoate reductase PanE/ApbA//GGL domain//Domain found in Dishevelled, Egl-10, and Pleckstrin (DEP)//Tom37 C-terminal domain	GO:0038032//GO:0007165//GO:0016480//GO:0035556//GO:0015940//GO:0055114//GO:0006626//GO:0007186	termination of G-protein coupled receptor signaling pathway//signal transduction//negative regulation of transcription from RNA polymerase III promoter//intracellular signal transduction//pantothenate biosynthetic process//oxidation-reduction process//protein targeting to mitochondrion//G-protein coupled receptor signaling pathway	GO:0008677//GO:0004871	2-dehydropantoate 2-reductase activity//signal transducer activity	GO:0005741//GO:0005834	mitochondrial outer membrane//heterotrimeric G-protein complex	KOG3589	G protein signaling regulators
c51345_g3	2598	512897002	XP_004924046.1	1802	0	PREDICTED: arylsulfatase B-like [Bombyx mori]	--	--	--	--	--	K01135	ARSB	arylsulfatase B	http://www.genome.jp/dbget-bin/www_bget?ko:K01135	Q8BM89	754	7.44778e-87	Arylsulfatase J OS=Mus musculus GN=Arsj PE=2 SV=1	PF01663//PF00884	Type I phosphodiesterase / nucleotide pyrophosphatase//Sulfatase	GO:0008152	metabolic process	GO:0003824//GO:0008484	catalytic activity//sulfuric ester hydrolase activity	--	--	KOG3867	Sulfatase
c4097_g1	335	--	--	--	--	--	--	--	--	--	--	--	--	--	--	--	--	--	--	PF07365	Alpha conotoxin precursor	GO:0007268//GO:0007165//GO:0009405	synaptic transmission//signal transduction//pathogenesis	GO:0030550	acetylcholine receptor inhibitor activity	GO:0005576	extracellular region	--	--
c5289_g1	382	--	--	--	--	--	--	--	--	--	--	--	--	--	--	--	--	--	--	--	--	--	--	--	--	--	--	--	--
c55075_g1	5283	512894825	XP_004923523.1	1092	3.44253e-133	PREDICTED: transcriptional activator protein Pur-alpha-like [Bombyx mori]	512894824	XM_004923466.1	317	1.17144e-162	PREDICTED: Bombyx mori transcriptional activator protein Pur-alpha-like (LOC101735314), mRNA	--	--	--	--	P42669	530	1.75052e-57	Transcriptional activator protein Pur-alpha OS=Mus musculus GN=Pura PE=1 SV=1	PF01245//PF15200	Ribosomal protein L19//Keratinocyte differentiation-associated	GO:0042254//GO:0006412	ribosome biogenesis//translation	GO:0003735	structural constituent of ribosome	GO:0005622//GO:0005576//GO:0005840	intracellular//extracellular region//ribosome	--	--
c8870_g1	212	--	--	--	--	--	--	--	--	--	--	--	--	--	--	--	--	--	--	--	--	--	--	--	--	--	--	--	--
c72256_g1	377	--	--	--	--	--	--	--	--	--	--	--	--	--	--	--	--	--	--	--	--	--	--	--	--	--	--	--	--
c53438_g1	2939	357609138	EHJ66315.1	1591	0	hypothetical protein KGM_18224 [Danaus plexippus]	347964360	XM_311252.5	209	7.06036e-103	Anopheles gambiae str. PEST AGAP000715-PA (AgaP_AGAP000715) mRNA, complete cds	--	--	--	--	Q5R4U0	617	2.06496e-70	Carbonic anhydrase-related protein 10 OS=Pongo abelii GN=CA10 PE=2 SV=1	PF07535	DBF zinc finger	GO:0006730//GO:0006807//GO:0006278	one-carbon metabolic process//nitrogen compound metabolic process//RNA-dependent DNA replication	GO:0003964//GO:0004089//GO:0003676//GO:0003723//GO:0008270	RNA-directed DNA polymerase activity//carbonate dehydratase activity//nucleic acid binding//RNA binding//zinc ion binding	GO:0005576	extracellular region	KOG0382	Carbonic anhydrase
c40917_g1	571	--	--	--	--	--	--	--	--	--	--	--	--	--	--	--	--	--	--	--	--	--	--	--	--	--	--	--	--
c52117_g1	1889	357626629	EHJ76653.1	1301	1.91804e-169	hypothetical protein KGM_16705 [Danaus plexippus]	--	--	--	--	--	--	--	--	--	Q3ZCX4	304	1.78917e-27	Zinc finger protein 568 OS=Homo sapiens GN=ZNF568 PE=2 SV=2	PF07776//PF00096	Zinc-finger associated domain (zf-AD)//Zinc finger, C2H2 type	--	--	GO:0046872//GO:0008270	metal ion binding//zinc ion binding	GO:0005634	nucleus	KOG1721	FOG: Zn-finger
c86322_g1	245	512911740	XP_004927486.1	167	9.23932e-12	PREDICTED: uncharacterized protein LOC101740735 [Bombyx mori]	--	--	--	--	--	--	--	--	--	--	--	--	--	--	--	--	--	--	--	--	--	--	--
c26829_g1	396	--	--	--	--	--	--	--	--	--	--	--	--	--	--	--	--	--	--	--	--	--	--	--	--	--	--	--	--
c83528_g1	205	--	--	--	--	--	--	--	--	--	--	--	--	--	--	--	--	--	--	--	--	--	--	--	--	--	--	--	--
c71275_g1	211	357611860	EHJ67685.1	158	8.7271e-11	reverse transcriptase [Danaus plexippus]	--	--	--	--	--	--	--	--	--	--	--	--	--	--	--	GO:0006278	RNA-dependent DNA replication	GO:0003964//GO:0046872//GO:0008270//GO:0003723	RNA-directed DNA polymerase activity//metal ion binding//zinc ion binding//RNA binding	--	--	--	--
c76460_g1	213	--	--	--	--	--	--	--	--	--	--	--	--	--	--	--	--	--	--	--	--	--	--	--	--	--	--	--	--
c6144_g1	376	--	--	--	--	--	--	--	--	--	--	--	--	--	--	--	--	--	--	--	--	--	--	--	--	--	--	--	--
c71674_g1	255	--	--	--	--	--	--	--	--	--	--	--	--	--	--	--	--	--	--	--	--	--	--	--	--	--	--	--	--
c38183_g1	1083	--	--	--	--	--	--	--	--	--	--	--	--	--	--	--	--	--	--	PF05439	Jumping translocation breakpoint protein (JTB)	--	--	--	--	GO:0016021	integral component of membrane	--	--
c87731_g1	210	--	--	--	--	--	--	--	--	--	--	--	--	--	--	--	--	--	--	--	--	--	--	--	--	--	--	--	--
c61305_g1	204	--	--	--	--	--	--	--	--	--	--	--	--	--	--	--	--	--	--	--	--	--	--	--	--	--	--	--	--
c18137_g1	324	--	--	--	--	--	--	--	--	--	--	--	--	--	--	--	--	--	--	--	--	--	--	--	--	--	--	--	--
c43169_g1	425	--	--	--	--	--	--	--	--	--	--	--	--	--	--	--	--	--	--	--	--	--	--	--	--	--	--	--	--
c78910_g1	214	--	--	--	--	--	--	--	--	--	--	--	--	--	--	--	--	--	--	--	--	--	--	--	--	--	--	--	--
c81563_g1	238	--	--	--	--	--	--	--	--	--	--	--	--	--	--	--	--	--	--	PF11837//PF06072	Domain of unknown function (DUF3357)//Alphaherpesvirus tegument protein US9	GO:0006012//GO:0005982//GO:0005985	galactose metabolic process//starch metabolic process//sucrose metabolic process	GO:0004564//GO:0004575	beta-fructofuranosidase activity//sucrose alpha-glucosidase activity	GO:0019033//GO:0017177	viral tegument//glucosidase II complex	--	--
c52307_g2	2705	357611199	EHJ67362.1	3021	0	putative breast carcinoma amplified sequence [Danaus plexippus]	346709239	AK382318.1	661	0	Bombyx mori mRNA, clone: fdpe13I12	--	--	--	--	Q8SY41	1519	0	Breast carcinoma-amplified sequence 3 homolog OS=Drosophila melanogaster GN=rudhira PE=1 SV=1	PF00311//PF00400	Phosphoenolpyruvate carboxylase//WD domain, G-beta repeat	GO:0015977//GO:0006094//GO:0006099//GO:0019643	carbon fixation//gluconeogenesis//tricarboxylic acid cycle//reductive tricarboxylic acid cycle	GO:0005515//GO:0008964	protein binding//phosphoenolpyruvate carboxylase activity	--	--	--	--
c41135_g1	570	--	--	--	--	--	--	--	--	--	--	--	--	--	--	--	--	--	--	--	--	--	--	--	--	--	--	--	--
c80244_g1	231	--	--	--	--	--	--	--	--	--	--	--	--	--	--	--	--	--	--	PF01515	Phosphate acetyl/butaryl transferase	GO:0008152	metabolic process	GO:0016746	transferase activity, transferring acyl groups	--	--	--	--
c85462_g1	201	--	--	--	--	--	--	--	--	--	--	--	--	--	--	--	--	--	--	--	--	--	--	--	--	--	--	--	--
c64203_g1	220	--	--	--	--	--	--	--	--	--	--	--	--	--	--	--	--	--	--	--	--	--	--	--	--	--	--	--	--
c32425_g1	378	--	--	--	--	--	--	--	--	--	--	--	--	--	--	--	--	--	--	--	--	--	--	--	--	--	--	--	--
c40234_g1	1935	512913389	XP_004927883.1	1450	0	PREDICTED: CCR4-NOT transcription complex subunit 7-like [Bombyx mori]	512913388	XM_004927826.1	346	3.21147e-179	PREDICTED: Bombyx mori CCR4-NOT transcription complex subunit 7-like (LOC101744656), mRNA	K12581	CNOT7_8, CAF1, POP2	CCR4-NOT transcription complex subunit 7/8	http://www.genome.jp/dbget-bin/www_bget?ko:K12581	Q60809	1011	4.63662e-131	CCR4-NOT transcription complex subunit 7 OS=Mus musculus GN=Cnot7 PE=1 SV=1	PF04857	CAF1 family ribonuclease	--	--	--	--	GO:0005634	nucleus	KOG0304	mRNA deadenylase subunit
c4816_g1	209	--	--	--	--	--	--	--	--	--	--	--	--	--	--	--	--	--	--	--	--	--	--	--	--	--	--	--	--
c12676_g1	242	--	--	--	--	--	--	--	--	--	--	--	--	--	--	--	--	--	--	--	--	--	--	--	--	--	--	--	--
c61439_g1	234	--	--	--	--	--	--	--	--	--	--	--	--	--	--	--	--	--	--	--	--	--	--	--	--	--	--	--	--
c60802_g1	261	--	--	--	--	--	--	--	--	--	--	--	--	--	--	--	--	--	--	--	--	--	--	--	--	--	--	--	--
c7824_g1	265	--	--	--	--	--	--	--	--	--	--	--	--	--	--	--	--	--	--	--	--	--	--	--	--	--	--	--	--
c23477_g2	451	357625314	EHJ75800.1	419	1.71563e-44	hypothetical protein KGM_03178 [Danaus plexippus]	--	--	--	--	--	--	--	--	--	--	--	--	--	--	--	--	--	--	--	--	--	--	--
c81537_g1	229	--	--	--	--	--	--	--	--	--	--	--	--	--	--	--	--	--	--	--	--	--	--	--	--	--	--	--	--
c9927_g1	202	--	--	--	--	--	--	--	--	--	--	--	--	--	--	--	--	--	--	--	--	--	--	--	--	--	--	--	--
c74983_g1	201	--	--	--	--	--	--	--	--	--	--	--	--	--	--	--	--	--	--	--	--	--	--	--	--	--	--	--	--
c56747_g1	263	--	--	--	--	--	--	--	--	--	--	--	--	--	--	--	--	--	--	--	--	--	--	--	--	--	--	--	--
c41376_g1	1277	389608211	BAM17717.1	1691	0	receptor of activated protein kinase C 1 [Papilio xuthus] >gi|389610733|dbj|BAM18977.1| receptor of activated protein kinase C 1 [Papilio polytes]	28201164	AB089281.1	647	0	Mamestra brassicae mRNA for receptor for activated protein kinase C homolog, complete cds >gnl|BL_ORD_ID|568388 Helicoverpa armigera receptor of activated protein kinase C mRNA, complete cds	K14753	RACK1	guanine nucleotide-binding protein subunit beta-2-like 1 protein	http://www.genome.jp/dbget-bin/www_bget?ko:K14753	O18640	1467	0	Guanine nucleotide-binding protein subunit beta-like protein OS=Drosophila melanogaster GN=Rack1 PE=1 SV=2	PF00400	WD domain, G-beta repeat	--	--	GO:0005515	protein binding	--	--	KOG0279	G protein beta subunit-like protein
c51368_g1	6599	512912606	XP_004927700.1	2229	0	PREDICTED: microtubule-associated protein futsch-like [Bombyx mori]	548516183	XM_005696087.1	86	3.78532e-34	PREDICTED: Capra hircus protein kinase C, delta (PRKCD), mRNA	K06068	PRKCD	novel protein kinase C delta type	http://www.genome.jp/dbget-bin/www_bget?ko:K06068	P83099	1427	1.11809e-173	Putative protein kinase C delta type homolog OS=Drosophila melanogaster GN=Pkcdelta PE=2 SV=3	PF06293//PF00433//PF00069//PF07714	Lipopolysaccharide kinase (Kdo/WaaP) family//Protein kinase C terminal domain//Protein kinase domain//Protein tyrosine kinase	GO:0006468//GO:0016310//GO:0009103//GO:0009069	protein phosphorylation//phosphorylation//lipopolysaccharide biosynthetic process//serine family amino acid metabolic process	GO:0004674//GO:0004672//GO:0005524//GO:0016773	protein serine/threonine kinase activity//protein kinase activity//ATP binding//phosphotransferase activity, alcohol group as acceptor	GO:0016020	membrane	KOG0694	Serine/threonine protein kinase
c65022_g1	234	--	--	--	--	--	--	--	--	--	--	--	--	--	--	--	--	--	--	--	--	--	--	--	--	--	--	--	--
c64047_g1	499	--	--	--	--	--	--	--	--	--	--	--	--	--	--	--	--	--	--	--	--	--	--	--	--	--	--	--	--
c80860_g1	312	--	--	--	--	--	--	--	--	--	--	--	--	--	--	--	--	--	--	--	--	--	--	--	--	--	--	--	--
c74274_g1	350	--	--	--	--	--	--	--	--	--	--	--	--	--	--	--	--	--	--	--	--	--	--	--	--	--	--	--	--
c50523_g1	1324	357621409	EHJ73253.1	1590	0	mortality factor 4-like protein [Danaus plexippus]	--	--	--	--	--	K11339	MORF4L1, MRG15, EAF3	mortality factor 4-like protein 1	http://www.genome.jp/dbget-bin/www_bget?ko:K11339	Q6AYU1	901	9.38864e-117	Mortality factor 4-like protein 1 OS=Rattus norvegicus GN=Morf4l1 PE=2 SV=1	PF03278	IpaB/EvcA family	GO:0009405	pathogenesis	--	--	GO:0005634	nucleus	KOG3001	Dosage compensation regulatory complex/histone acetyltransferase complex, subunit MSL-3/MRG15/EAF3, and related CHROMO domain-containing proteins
c76281_g1	332	--	--	--	--	--	--	--	--	--	--	--	--	--	--	--	--	--	--	--	--	--	--	--	--	--	--	--	--
c25533_g1	406	--	--	--	--	--	--	--	--	--	--	--	--	--	--	--	--	--	--	--	--	--	--	--	--	--	--	--	--
c79012_g1	365	--	--	--	--	--	--	--	--	--	--	--	--	--	--	--	--	--	--	--	--	--	--	--	--	--	--	--	--
c51146_g1	1535	--	--	--	--	--	--	--	--	--	--	--	--	--	--	--	--	--	--	--	--	--	--	--	--	--	--	--	--
c82720_g1	825	317137109	XP_001727504.2	711	9.69827e-92	histone H3 [Aspergillus oryzae RIB40]	84573994	AB226293.1	794	0	Aspergillus oryzae cDNA, contig sequence: AoEST3155	K11253	H3	histone H3	http://www.genome.jp/dbget-bin/www_bget?ko:K11253	P61834	697	4.01093e-91	Histone H3 OS=Penicillium funiculosum GN=HHT1 PE=3 SV=2	PF00808//PF00125	Histone-like transcription factor (CBF/NF-Y) and archaeal histone//Core histone H2A/H2B/H3/H4	GO:0006281//GO:0006334	DNA repair//nucleosome assembly	GO:0043565//GO:0046982//GO:0003677	sequence-specific DNA binding//protein heterodimerization activity//DNA binding	GO:0000786//GO:0005622//GO:0005634	nucleosome//intracellular//nucleus	KOG1745	Histones H3 and H4
c86922_g1	295	--	--	--	--	--	--	--	--	--	--	--	--	--	--	--	--	--	--	--	--	--	--	--	--	--	--	--	--
c11602_g1	277	--	--	--	--	--	--	--	--	--	--	--	--	--	--	--	--	--	--	--	--	--	--	--	--	--	--	--	--
c63108_g1	519	--	--	--	--	--	--	--	--	--	--	--	--	--	--	--	--	--	--	--	--	--	--	--	--	--	--	--	--
c56010_g2	1687	642935081	XP_008197876.1	1146	1.90167e-137	PREDICTED: calmodulin-binding transcription activator 2-like isoform X2 [Tribolium castaneum]	625280172	XM_007633543.1	97	7.3164e-41	PREDICTED: Cricetulus griseus calmodulin-binding transcription activator 1 (LOC100762490), transcript variant X3, mRNA	--	--	--	--	Q9Y6Y1	626	4.52997e-68	Calmodulin-binding transcription activator 1 OS=Homo sapiens GN=CAMTA1 PE=1 SV=4	PF03859	CG-1 domain	--	--	GO:0003677	DNA binding	GO:0005634	nucleus	KOG0520	Uncharacterized conserved protein, contains IPT/TIG domain
c84356_g1	222	--	--	--	--	--	--	--	--	--	--	--	--	--	--	--	--	--	--	--	--	--	--	--	--	--	--	--	--
c36738_g1	309	--	--	--	--	--	--	--	--	--	--	--	--	--	--	--	--	--	--	--	--	--	--	--	--	--	--	--	--
c71310_g1	253	--	--	--	--	--	--	--	--	--	--	--	--	--	--	--	--	--	--	--	--	--	--	--	--	--	--	--	--
c33393_g1	243	--	--	--	--	--	--	--	--	--	--	--	--	--	--	--	--	--	--	--	--	--	--	--	--	--	--	--	--
c19438_g1	362	--	--	--	--	--	--	--	--	--	--	--	--	--	--	--	--	--	--	--	--	--	--	--	--	--	--	--	--
c88062_g1	213	--	--	--	--	--	--	--	--	--	--	--	--	--	--	--	--	--	--	--	--	--	--	--	--	--	--	--	--
c69821_g1	335	--	--	--	--	--	--	--	--	--	--	--	--	--	--	--	--	--	--	--	--	--	--	--	--	--	--	--	--
c50308_g2	1671	--	--	--	--	--	--	--	--	--	--	--	--	--	--	--	--	--	--	--	--	--	--	--	--	--	--	--	--
c8016_g1	248	--	--	--	--	--	--	--	--	--	--	--	--	--	--	--	--	--	--	--	--	--	--	--	--	--	--	--	--
c37092_g1	1086	--	--	--	--	--	--	--	--	--	--	--	--	--	--	--	--	--	--	--	--	--	--	--	--	--	--	--	--
c64605_g1	266	--	--	--	--	--	--	--	--	--	--	--	--	--	--	--	--	--	--	--	--	--	--	--	--	--	--	--	--
c54313_g1	2613	--	--	--	--	--	--	--	--	--	--	--	--	--	--	--	--	--	--	PF02740	Colipase, C-terminal domain	GO:0007586//GO:0016042	digestion//lipid catabolic process	GO:0008047	enzyme activator activity	GO:0005576	extracellular region	--	--
c33159_g1	376	--	--	--	--	--	--	--	--	--	--	--	--	--	--	--	--	--	--	--	--	--	--	--	--	--	--	--	--
c57784_g1	289	--	--	--	--	--	--	--	--	--	--	--	--	--	--	--	--	--	--	--	--	--	--	--	--	--	--	--	--
c55394_g1	2640	512934030	XP_004932935.1	813	4.62562e-90	PREDICTED: uncharacterized protein PF11_0213-like [Bombyx mori]	--	--	--	--	--	--	--	--	--	--	--	--	--	PF00420	NADH-ubiquinone/plastoquinone oxidoreductase chain 4L	GO:0055114//GO:0042773	oxidation-reduction process//ATP synthesis coupled electron transport	GO:0016651	oxidoreductase activity, acting on NAD(P)H	--	--	--	--
c74675_g1	469	--	--	--	--	--	--	--	--	--	--	--	--	--	--	--	--	--	--	--	--	--	--	--	--	--	--	--	--
c13347_g1	330	--	--	--	--	--	--	--	--	--	--	--	--	--	--	--	--	--	--	--	--	--	--	--	--	--	--	--	--
c60800_g1	331	--	--	--	--	--	--	--	--	--	--	--	--	--	--	--	--	--	--	--	--	--	--	--	--	--	--	--	--
c8192_g1	418	--	--	--	--	--	--	--	--	--	--	--	--	--	--	--	--	--	--	--	--	--	--	--	--	--	--	--	--
c74696_g1	341	--	--	--	--	--	--	--	--	--	--	--	--	--	--	--	--	--	--	--	--	--	--	--	--	--	--	--	--
c86014_g1	241	--	--	--	--	--	--	--	--	--	--	--	--	--	--	--	--	--	--	--	--	--	--	--	--	--	--	--	--
c7855_g1	1995	--	--	--	--	--	--	--	--	--	--	--	--	--	--	--	--	--	--	PF01363	FYVE zinc finger	--	--	GO:0046872	metal ion binding	--	--	--	--
c51252_g1	1770	357609357	EHJ66404.1	957	6.86605e-119	hypothetical protein KGM_01158 [Danaus plexippus]	--	--	--	--	--	K12866	WBP11, NPWBP	WW domain-binding protein 11	http://www.genome.jp/dbget-bin/www_bget?ko:K12866	Q923D5	364	1.60843e-35	WW domain-binding protein 11 OS=Mus musculus GN=Wbp11 PE=1 SV=2	PF09429	WW domain binding protein 11	GO:0006396	RNA processing	--	--	--	--	KOG4672	Uncharacterized conserved low complexity protein
c18363_g1	219	270001170	EEZ97617.1	132	1.15303e-07	hypothetical protein TcasGA2_TC012951 [Tribolium castaneum]	--	--	--	--	--	--	--	--	--	--	--	--	--	--	--	--	--	--	--	--	--	--	--
c50700_g1	539	--	--	--	--	--	--	--	--	--	--	--	--	--	--	--	--	--	--	--	--	--	--	--	--	--	--	--	--
c83886_g1	503	--	--	--	--	--	--	--	--	--	--	--	--	--	--	--	--	--	--	--	--	--	--	--	--	--	--	--	--
c86045_g1	215	--	--	--	--	--	--	--	--	--	--	--	--	--	--	--	--	--	--	--	--	--	--	--	--	--	--	--	--
c77303_g1	258	--	--	--	--	--	--	--	--	--	--	--	--	--	--	--	--	--	--	--	--	--	--	--	--	--	--	--	--
c54501_g1	3914	270011295	EFA07743.1	1130	4.52106e-128	hypothetical protein TcasGA2_TC002223 [Tribolium castaneum]	194680628	CU856175.4	1211	0	H.numata DNA sequence from clone AEHN-46M23, complete sequence	--	--	--	--	P10978	1036	3.7647e-117	Retrovirus-related Pol polyprotein from transposon TNT 1-94 OS=Nicotiana tabacum PE=2 SV=1	PF00098	Zinc knuckle	--	--	GO:0003676//GO:0008270	nucleic acid binding//zinc ion binding	--	--	--	--
c43598_g1	1820	512931022	XP_004932205.1	307	8.11293e-33	PREDICTED: PRKR-interacting protein 1 homolog [Bombyx mori]	--	--	--	--	--	--	--	--	--	Q6GNG8	223	5.03747e-22	PRKR-interacting protein 1 homolog OS=Xenopus laevis GN=prkrip1 PE=2 SV=1	--	--	--	--	--	--	--	--	--	--
c22255_g1	348	--	--	--	--	--	--	--	--	--	--	--	--	--	--	--	--	--	--	--	--	--	--	--	--	--	--	--	--
c17431_g1	293	--	--	--	--	--	--	--	--	--	--	--	--	--	--	--	--	--	--	--	--	--	--	--	--	--	--	--	--
c75302_g1	212	--	--	--	--	--	--	--	--	--	--	--	--	--	--	--	--	--	--	--	--	--	--	--	--	--	--	--	--
c33264_g1	364	--	--	--	--	--	--	--	--	--	--	--	--	--	--	--	--	--	--	--	--	--	--	--	--	--	--	--	--
c28132_g1	237	--	--	--	--	--	--	--	--	--	--	--	--	--	--	--	--	--	--	--	--	--	--	--	--	--	--	--	--
c73774_g1	1013	--	--	--	--	--	--	--	--	--	--	--	--	--	--	--	--	--	--	--	--	--	--	--	--	--	--	--	--
c31007_g1	207	--	--	--	--	--	--	--	--	--	--	--	--	--	--	--	--	--	--	--	--	--	--	--	--	--	--	--	--
c79845_g1	424	--	--	--	--	--	--	--	--	--	--	--	--	--	--	--	--	--	--	--	--	--	--	--	--	--	--	--	--
c86861_g1	363	--	--	--	--	--	--	--	--	--	--	--	--	--	--	--	--	--	--	--	--	--	--	--	--	--	--	--	--
c35552_g1	366	--	--	--	--	--	--	--	--	--	--	--	--	--	--	--	--	--	--	--	--	--	--	--	--	--	--	--	--
c76684_g1	299	--	--	--	--	--	--	--	--	--	--	--	--	--	--	--	--	--	--	--	--	--	--	--	--	--	--	--	--
c78871_g1	363	--	--	--	--	--	--	--	--	--	--	--	--	--	--	--	--	--	--	--	--	--	--	--	--	--	--	--	--
c10301_g1	281	--	--	--	--	--	--	--	--	--	--	--	--	--	--	--	--	--	--	--	--	--	--	--	--	--	--	--	--
c88505_g1	268	--	--	--	--	--	--	--	--	--	--	--	--	--	--	--	--	--	--	--	--	--	--	--	--	--	--	--	--
c11995_g1	219	--	--	--	--	--	--	--	--	--	--	--	--	--	--	--	--	--	--	--	--	--	--	--	--	--	--	--	--
c70287_g1	218	--	--	--	--	--	--	--	--	--	--	--	--	--	--	--	--	--	--	--	--	--	--	--	--	--	--	--	--
c11632_g1	265	--	--	--	--	--	--	--	--	--	--	--	--	--	--	--	--	--	--	--	--	--	--	--	--	--	--	--	--
c36120_g2	342	--	--	--	--	--	--	--	--	--	--	--	--	--	--	--	--	--	--	--	--	--	--	--	--	--	--	--	--
c75881_g1	241	--	--	--	--	--	--	--	--	--	--	--	--	--	--	--	--	--	--	--	--	--	--	--	--	--	--	--	--
c13810_g1	352	357619488	EHJ72041.1	346	1.51775e-37	putative cytochrome P450 CYP6AX1 protein [Danaus plexippus]	--	--	--	--	--	K14999	CYP6	cytochrome P450, family 6	http://www.genome.jp/dbget-bin/www_bget?ko:K14999	Q04552	220	2.8468e-20	Cytochrome P450 6B1 OS=Papilio polyxenes GN=CYP6B1 PE=1 SV=1	PF00067//PF03776	Cytochrome P450//Septum formation topological specificity factor MinE	GO:0055114//GO:0006118//GO:0051301//GO:0032955	oxidation-reduction process//electron transport//cell division//regulation of barrier septum assembly	GO:0020037//GO:0009055//GO:0004497//GO:0005506//GO:0016705	heme binding//electron carrier activity//monooxygenase activity//iron ion binding//oxidoreductase activity, acting on paired donors, with incorporation or reduction of molecular oxygen	--	--	KOG0158	Cytochrome P450 CYP3/CYP5/CYP6/CYP9 subfamilies
c66223_g1	204	--	--	--	--	--	--	--	--	--	--	--	--	--	--	--	--	--	--	--	--	--	--	--	--	--	--	--	--
c15074_g1	268	--	--	--	--	--	--	--	--	--	--	--	--	--	--	--	--	--	--	--	--	--	--	--	--	--	--	--	--
c60133_g1	277	--	--	--	--	--	--	--	--	--	--	--	--	--	--	--	--	--	--	--	--	--	--	--	--	--	--	--	--
c86337_g1	204	--	--	--	--	--	--	--	--	--	--	--	--	--	--	--	--	--	--	--	--	--	--	--	--	--	--	--	--
c34424_g1	206	--	--	--	--	--	--	--	--	--	--	--	--	--	--	--	--	--	--	--	--	--	--	--	--	--	--	--	--
c79946_g1	318	--	--	--	--	--	--	--	--	--	--	--	--	--	--	--	--	--	--	--	--	--	--	--	--	--	--	--	--
c48882_g1	7511	512935146	XP_004933203.1	4652	0	PREDICTED: uncharacterized protein LOC101741127 [Bombyx mori]	512935145	XM_004933146.1	1146	0	PREDICTED: Bombyx mori uncharacterized LOC101741127 (LOC101741127), mRNA	--	--	--	--	Q9H9D4	275	7.13761e-23	Zinc finger protein 408 OS=Homo sapiens GN=ZNF408 PE=1 SV=1	PF00096//PF12125//PF02443	Zinc finger, C2H2 type//D domain of beta-TrCP//Circovirus capsid protein	GO:0019069	viral capsid assembly	GO:0046983//GO:0046872	protein dimerization activity//metal ion binding	GO:0042025	host cell nucleus	KOG1721	FOG: Zn-finger
c51871_g1	3301	166706856	NP_001098066.2	3672	0	aubergine protein [Bombyx mori] >gi|157674348|gb|ABV60274.1| PIWI [Bombyx mori] >gi|164605503|dbj|BAF98574.1| Piwi [Bombyx mori] >gi|166245170|dbj|BAF73718.2| siwi [Bombyx mori]	430721596	JQ745644.1	40	7.02148e-09	Myotis ricketti piwi-like protein 1 mRNA, partial cds	K02156	AUB, PIWI	aubergine	http://www.genome.jp/dbget-bin/www_bget?ko:K02156	O76922	1794	0	Protein aubergine OS=Drosophila melanogaster GN=aub PE=1 SV=1	PF02170//PF04310//PF02171	PAZ domain//MukB N-terminal//Piwi domain	GO:0007059//GO:0030261	chromosome segregation//chromosome condensation	GO:0005524//GO:0003677//GO:0005515//GO:0003676	ATP binding//DNA binding//protein binding//nucleic acid binding	GO:0009295	nucleoid	KOG1042	Germ-line stem cell division protein Hiwi/Piwi; negative developmental regulator
c56146_g1	434	--	--	--	--	--	--	--	--	--	--	--	--	--	--	--	--	--	--	--	--	--	--	--	--	--	--	--	--
c46623_g1	993	512898627	XP_004924443.1	708	3.03906e-90	PREDICTED: zinc finger HIT domain-containing protein 1-like [Bombyx mori]	389610104	AK402042.1	293	4.70392e-150	Papilio xuthus mRNA for similar to CG31917, complete cds, sequence id: Px-2194	K11663	ZNHIT1, VPS71	zinc finger HIT domain-containing protein 1	http://www.genome.jp/dbget-bin/www_bget?ko:K11663	O43257	351	1.55572e-38	Zinc finger HIT domain-containing protein 1 OS=Homo sapiens GN=ZNHIT1 PE=1 SV=1	PF02685//PF06331	Glucokinase//Transcription factor TFIIH complex subunit Tfb5	GO:0006012//GO:0019872//GO:0006355//GO:0006096//GO:0006289//GO:0051156//GO:0005985//GO:0005982//GO:0006094	galactose metabolic process//streptomycin biosynthetic process//regulation of transcription, DNA-templated//glycolytic process//nucleotide-excision repair//glucose 6-phosphate metabolic process//sucrose metabolic process//starch metabolic process//gluconeogenesis	GO:0004340//GO:0005524	glucokinase activity//ATP binding	GO:0000439	core TFIIH complex	KOG3362	Predicted BBOX Zn-finger protein
c79535_g1	201	--	--	--	--	--	--	--	--	--	--	--	--	--	--	--	--	--	--	--	--	--	--	--	--	--	--	--	--
c86735_g1	269	--	--	--	--	--	--	--	--	--	--	--	--	--	--	--	--	--	--	PF03325	Herpesvirus polymerase accessory protein	GO:0006260//GO:0019079	DNA replication//viral genome replication	GO:0030337	DNA polymerase processivity factor activity	GO:0042575	DNA polymerase complex	--	--
c39407_g1	943	--	--	--	--	--	--	--	--	--	--	--	--	--	--	--	--	--	--	--	--	--	--	--	--	--	--	--	--
c39943_g1	491	--	--	--	--	--	--	--	--	--	--	--	--	--	--	--	--	--	--	--	--	--	--	--	--	--	--	--	--
c72394_g1	247	--	--	--	--	--	--	--	--	--	--	--	--	--	--	--	--	--	--	--	--	--	--	--	--	--	--	--	--
c35098_g1	273	--	--	--	--	--	--	--	--	--	--	--	--	--	--	--	--	--	--	--	--	--	--	--	--	--	--	--	--
c56698_g1	392	--	--	--	--	--	--	--	--	--	--	--	--	--	--	--	--	--	--	--	--	--	--	--	--	--	--	--	--
c49732_g1	926	512927503	XP_004931351.1	431	2.61766e-49	PREDICTED: DNA repair protein RAD51 homolog 3-like [Bombyx mori]	--	--	--	--	--	--	--	--	--	Q924H5	249	8.2791e-26	DNA repair protein RAD51 homolog 3 OS=Mus musculus GN=Rad51c PE=2 SV=1	PF00154//PF00895	recA bacterial DNA recombination protein//ATP synthase protein 8	GO:0015986//GO:0006281//GO:0009432//GO:0015992	ATP synthesis coupled proton transport//DNA repair//SOS response//proton transport	GO:0003697//GO:0005524//GO:0015078	single-stranded DNA binding//ATP binding//hydrogen ion transmembrane transporter activity	GO:0000276	mitochondrial proton-transporting ATP synthase complex, coupling factor F(o)	KOG1434	Meiotic recombination protein Dmc1
c39074_g1	834	--	--	--	--	--	--	--	--	--	--	--	--	--	--	--	--	--	--	--	--	--	--	--	--	--	--	--	--
c85878_g1	405	669307745	KFD51253.1	411	3.70843e-46	hypothetical protein M513_07853 [Trichuris suis]	--	--	--	--	--	K07497	K07497	putative transposase	http://www.genome.jp/dbget-bin/www_bget?ko:K07497	Q7LHG5	313	6.15577e-32	Transposon Ty3-I Gag-Pol polyprotein OS=Saccharomyces cerevisiae (strain ATCC 204508 / S288c) GN=TY3B-I PE=3 SV=2	PF00078	Reverse transcriptase (RNA-dependent DNA polymerase)	GO:0006278	RNA-dependent DNA replication	GO:0003723//GO:0003964	RNA binding//RNA-directed DNA polymerase activity	--	--	KOG0017	FOG: Transposon-encoded proteins with TYA, reverse transcriptase, integrase domains in various combinations
c62588_g1	1576	--	--	--	--	--	--	--	--	--	--	--	--	--	--	--	--	--	--	--	--	--	--	--	--	--	--	--	--
c76860_g1	426	--	--	--	--	--	--	--	--	--	--	--	--	--	--	--	--	--	--	--	--	--	--	--	--	--	--	--	--
c58068_g1	248	306569738	ADN03363.1	240	1.61456e-22	olfactory receptor 20, partial [Helicoverpa assulta]	--	--	--	--	--	--	--	--	--	--	--	--	--	PF02949	7tm Odorant receptor	GO:0050911//GO:0007608//GO:0007187	detection of chemical stimulus involved in sensory perception of smell//sensory perception of smell//G-protein coupled receptor signaling pathway, coupled to cyclic nucleotide second messenger	GO:0004984//GO:0005549	olfactory receptor activity//odorant binding	GO:0016020	membrane	--	--
c3367_g1	339	512896216	XP_004923858.1	130	1.28087e-06	PREDICTED: piggyBac transposable element-derived protein 4-like isoform X3 [Bombyx mori]	--	--	--	--	--	--	--	--	--	--	--	--	--	--	--	--	--	--	--	--	--	--	--
c19452_g1	391	--	--	--	--	--	--	--	--	--	--	--	--	--	--	--	--	--	--	--	--	--	--	--	--	--	--	--	--
c37613_g1	860	152149046	2EI9	365	2.2444e-38	Chain A, Crystal Structure Of R1bm Endonuclease Domain	--	--	--	--	--	--	--	--	--	Q03277	124	2.99921e-06	Retrovirus-related Pol polyprotein from type-1 retrotransposable element R1 (Fragment) OS=Bradysia coprophila PE=4 SV=1	--	--	--	--	--	--	--	--	--	--
c35473_g2	518	--	--	--	--	--	--	--	--	--	--	--	--	--	--	--	--	--	--	--	--	--	--	--	--	--	--	--	--
c61163_g1	202	--	--	--	--	--	--	--	--	--	--	--	--	--	--	--	--	--	--	--	--	--	--	--	--	--	--	--	--
c36962_g1	692	--	--	--	--	--	--	--	--	--	--	--	--	--	--	--	--	--	--	--	--	--	--	--	--	--	--	--	--
c42313_g1	377	--	--	--	--	--	--	--	--	--	--	--	--	--	--	--	--	--	--	--	--	--	--	--	--	--	--	--	--
c59108_g1	241	--	--	--	--	--	--	--	--	--	--	--	--	--	--	--	--	--	--	--	--	--	--	--	--	--	--	--	--
c36221_g1	263	--	--	--	--	--	--	--	--	--	--	--	--	--	--	--	--	--	--	--	--	--	--	--	--	--	--	--	--
c70773_g1	209	--	--	--	--	--	--	--	--	--	--	--	--	--	--	--	--	--	--	--	--	--	--	--	--	--	--	--	--
c73817_g1	247	--	--	--	--	--	--	--	--	--	--	--	--	--	--	--	--	--	--	--	--	--	--	--	--	--	--	--	--
c57506_g1	225	--	--	--	--	--	--	--	--	--	--	--	--	--	--	--	--	--	--	--	--	--	--	--	--	--	--	--	--
c3916_g1	292	--	--	--	--	--	--	--	--	--	--	--	--	--	--	--	--	--	--	--	--	--	--	--	--	--	--	--	--
c78404_g1	898	512918948	XP_004929256.1	502	7.45012e-60	PREDICTED: uncharacterized protein LOC101737071 [Bombyx mori]	--	--	--	--	--	--	--	--	--	--	--	--	--	--	--	--	--	--	--	--	--	--	--
c50409_g2	285	--	--	--	--	--	--	--	--	--	--	--	--	--	--	--	--	--	--	--	--	--	--	--	--	--	--	--	--
c6554_g1	238	217071218	ACJ83969.1	126	1.2322e-07	unknown [Medicago truncatula]	689936939	LM421857.1	198	6.53168e-98	Enterobius vermicularis genome assembly E_vermicularis_Canary_Islands ,scaffold EVEC_scaffold0007883	--	--	--	--	--	--	--	--	--	--	--	--	--	--	--	--	--	--
c42331_g1	1033	675385466	KFM78363.1	356	9.72552e-35	Laminin subunit alpha-1, partial [Stegodyphus mimosarum]	--	--	--	--	--	--	--	--	--	P24043	225	1.39864e-18	Laminin subunit alpha-2 OS=Homo sapiens GN=LAMA2 PE=1 SV=4	--	--	--	--	--	--	--	--	KOG1836	Extracellular matrix glycoprotein Laminin subunits alpha and gamma
c50297_g1	1819	512891615	XP_004922728.1	1076	9.17162e-140	PREDICTED: sarcoplasmic calcium-binding protein-like [Bombyx mori]	--	--	--	--	--	--	--	--	--	P04571	285	1.17928e-27	Sarcoplasmic calcium-binding protein OS=Hediste diversicolor PE=1 SV=1	PF00036//PF13405//PF13499//PF10591//PF13202	EF hand//EF-hand domain//EF-hand domain pair//Secreted protein acidic and rich in cysteine Ca binding region//EF hand	GO:0007165	signal transduction	GO:0005509	calcium ion binding	GO:0005578	proteinaceous extracellular matrix	KOG0028	Ca2+-binding protein (centrin/caltractin), EF-Hand superfamily protein
c20307_g1	213	--	--	--	--	--	--	--	--	--	--	--	--	--	--	--	--	--	--	--	--	--	--	--	--	--	--	--	--
c56633_g1	257	--	--	--	--	--	--	--	--	--	--	--	--	--	--	--	--	--	--	--	--	--	--	--	--	--	--	--	--
c63363_g1	321	--	--	--	--	--	402766946	NM_001162820.2	51	4.75605e-16	Acyrthosiphon pisum coiled-coil domain containing 53 (Ccdc53), mRNA	--	--	--	--	--	--	--	--	--	--	--	--	--	--	--	--	--	--
c30980_g1	300	--	--	--	--	--	--	--	--	--	--	--	--	--	--	--	--	--	--	--	--	--	--	--	--	--	--	--	--
c86138_g1	232	--	--	--	--	--	--	--	--	--	--	--	--	--	--	--	--	--	--	--	--	--	--	--	--	--	--	--	--
c52098_g3	324	--	--	--	--	--	--	--	--	--	--	--	--	--	--	--	--	--	--	--	--	--	--	--	--	--	--	--	--
c30972_g1	355	357612592	EHJ68076.1	305	1.04997e-30	hypothetical protein KGM_06545 [Danaus plexippus]	--	--	--	--	--	--	--	--	--	--	--	--	--	PF00858	Amiloride-sensitive sodium channel	GO:0006811//GO:0006814	ion transport//sodium ion transport	GO:0005272	sodium channel activity	GO:0016020	membrane	--	--
c72191_g1	219	--	--	--	--	--	--	--	--	--	--	--	--	--	--	--	--	--	--	--	--	--	--	--	--	--	--	--	--
c70145_g1	485	--	--	--	--	--	--	--	--	--	--	--	--	--	--	--	--	--	--	--	--	--	--	--	--	--	--	--	--
c85054_g1	228	--	--	--	--	--	--	--	--	--	--	--	--	--	--	--	--	--	--	--	--	--	--	--	--	--	--	--	--
c47344_g1	1585	392514718	AFM77764.1	1363	0	putative chymotrypsin 5 [Ostrinia nubilalis]	392514717	JQ904134.1	877	0	Ostrinia nubilalis putative chymotrypsin 5 (CTP5) mRNA, complete cds	--	--	--	--	P08897	328	5.05537e-33	Collagenase OS=Hypoderma lineatum PE=1 SV=3	PF00089	Trypsin	GO:0006508	proteolysis	GO:0004252	serine-type endopeptidase activity	--	--	KOG3627	Trypsin
c14640_g1	264	--	--	--	--	--	--	--	--	--	--	--	--	--	--	--	--	--	--	--	--	--	--	--	--	--	--	--	--
c52338_g1	1996	--	--	--	--	--	--	--	--	--	--	--	--	--	--	--	--	--	--	--	--	--	--	--	--	--	--	--	--
c43624_g1	1209	--	--	--	--	--	--	--	--	--	--	--	--	--	--	--	--	--	--	--	--	--	--	--	--	--	--	--	--
c34135_g1	839	--	--	--	--	--	--	--	--	--	--	--	--	--	--	--	--	--	--	--	--	--	--	--	--	--	--	--	--
c26175_g1	509	--	--	--	--	--	--	--	--	--	--	--	--	--	--	--	--	--	--	--	--	--	--	--	--	--	--	--	--
c39868_g1	275	--	--	--	--	--	--	--	--	--	--	--	--	--	--	--	--	--	--	--	--	--	--	--	--	--	--	--	--
c22776_g1	445	--	--	--	--	--	--	--	--	--	--	--	--	--	--	--	--	--	--	--	--	--	--	--	--	--	--	--	--
c42107_g1	1088	--	--	--	--	--	--	--	--	--	--	--	--	--	--	--	--	--	--	--	--	--	--	--	--	--	--	--	--
c39981_g1	879	383849342	XP_003700304.1	144	2.47628e-07	PREDICTED: uncharacterized protein LOC100881262 [Megachile rotundata]	--	--	--	--	--	--	--	--	--	--	--	--	--	--	--	--	--	--	--	--	--	--	--
c72024_g1	268	--	--	--	--	--	--	--	--	--	--	--	--	--	--	--	--	--	--	--	--	--	--	--	--	--	--	--	--
c51180_g2	367	--	--	--	--	--	--	--	--	--	--	--	--	--	--	--	--	--	--	--	--	--	--	--	--	--	--	--	--
c79482_g1	221	--	--	--	--	--	--	--	--	--	--	--	--	--	--	--	--	--	--	--	--	--	--	--	--	--	--	--	--
c76703_g1	213	--	--	--	--	--	--	--	--	--	--	--	--	--	--	--	--	--	--	--	--	--	--	--	--	--	--	--	--
c68265_g1	392	--	--	--	--	--	--	--	--	--	--	--	--	--	--	--	--	--	--	--	--	--	--	--	--	--	--	--	--
c38305_g1	715	--	--	--	--	--	--	--	--	--	--	--	--	--	--	--	--	--	--	--	--	--	--	--	--	--	--	--	--
c58584_g1	850	--	--	--	--	--	--	--	--	--	--	--	--	--	--	--	--	--	--	--	--	--	--	--	--	--	--	--	--
c1730_g1	223	--	--	--	--	--	--	--	--	--	--	--	--	--	--	--	--	--	--	--	--	--	--	--	--	--	--	--	--
c72753_g1	213	--	--	--	--	--	--	--	--	--	--	--	--	--	--	--	--	--	--	--	--	--	--	--	--	--	--	--	--
c67125_g1	237	--	--	--	--	--	--	--	--	--	--	--	--	--	--	--	--	--	--	--	--	--	--	--	--	--	--	--	--
c26777_g1	325	--	--	--	--	--	--	--	--	--	--	--	--	--	--	--	--	--	--	--	--	--	--	--	--	--	--	--	--
c67032_g1	202	512895046	XP_004923578.1	126	8.54932e-07	PREDICTED: uncharacterized protein LOC101745418 [Bombyx mori]	--	--	--	--	--	--	--	--	--	--	--	--	--	PF00858	Amiloride-sensitive sodium channel	GO:0006814	sodium ion transport	GO:0005272	sodium channel activity	GO:0016020	membrane	--	--
c52327_g1	5073	512916040	XP_004928535.1	1071	1.60156e-126	PREDICTED: B(0,+)-type amino acid transporter 1-like [Bombyx mori]	512916039	XM_004928478.1	433	0	PREDICTED: Bombyx mori B(0,+)-type amino acid transporter 1-like (LOC101739545), mRNA	K13868	SLC7A9, BAT1	solute carrier family 7 (L-type amino acid transporter), member 9	http://www.genome.jp/dbget-bin/www_bget?ko:K13868	P82251	604	1.71756e-65	b(0,+)-type amino acid transporter 1 OS=Homo sapiens GN=SLC7A9 PE=1 SV=1	PF00324//PF13520	Amino acid permease//Amino acid permease	GO:0055085//GO:0006810//GO:0006865//GO:0003333	transmembrane transport//transport//amino acid transport//amino acid transmembrane transport	GO:0015171	amino acid transmembrane transporter activity	GO:0016020	membrane	KOG1287	Amino acid transporters
c29853_g1	320	--	--	--	--	--	--	--	--	--	--	--	--	--	--	--	--	--	--	--	--	--	--	--	--	--	--	--	--
c8081_g1	260	--	--	--	--	--	--	--	--	--	--	--	--	--	--	--	--	--	--	--	--	--	--	--	--	--	--	--	--
c71875_g1	232	--	--	--	--	--	--	--	--	--	--	--	--	--	--	--	--	--	--	--	--	--	--	--	--	--	--	--	--
c10645_g1	205	--	--	--	--	--	--	--	--	--	--	--	--	--	--	--	--	--	--	PF01258	Prokaryotic dksA/traR C4-type zinc finger	--	--	GO:0008270	zinc ion binding	--	--	--	--
c89006_g1	204	--	--	--	--	--	--	--	--	--	--	--	--	--	--	--	--	--	--	--	--	--	--	--	--	--	--	--	--
c57156_g1	308	--	--	--	--	--	--	--	--	--	--	--	--	--	--	--	--	--	--	--	--	--	--	--	--	--	--	--	--
c78490_g1	687	--	--	--	--	--	--	--	--	--	--	--	--	--	--	--	--	--	--	--	--	--	--	--	--	--	--	--	--
c46679_g1	1528	--	--	--	--	--	--	--	--	--	--	--	--	--	--	--	--	--	--	--	--	--	--	--	--	--	--	--	--
c18490_g1	286	--	--	--	--	--	--	--	--	--	--	--	--	--	--	--	--	--	--	--	--	--	--	--	--	--	--	--	--
c47977_g2	972	--	--	--	--	--	--	--	--	--	--	--	--	--	--	--	--	--	--	--	--	--	--	--	--	--	--	--	--
c49043_g1	1975	512922477	XP_004930127.1	1834	0	PREDICTED: adenylyl cyclase-associated protein 1-like isoform X2 [Bombyx mori] >gi|512922481|ref|XP_004930128.1| PREDICTED: adenylyl cyclase-associated protein 1-like isoform X3 [Bombyx mori]	291201236	FP340411.1	155	4.92115e-73	67K19_SfBAC_fin, Spodoptera frugiperda BAC, egg DNA	K17261	CAP1_2, SRV2	adenylyl cyclase-associated protein	http://www.genome.jp/dbget-bin/www_bget?ko:K17261	Q3SYV4	1037	4.32863e-132	Adenylyl cyclase-associated protein 1 OS=Bos taurus GN=CAP1 PE=2 SV=3	PF02205//PF08603//PF01213	WH2 motif//Adenylate cyclase associated (CAP) C terminal//Adenylate cyclase associated (CAP) N terminal	GO:0007010	cytoskeleton organization	GO:0003779	actin binding	--	--	KOG2675	Adenylate cyclase-associated protein (CAP/Srv2p)
c53531_g1	4928	512899149	XP_004924572.1	3605	0	PREDICTED: dolichyl-diphosphooligosaccharide--protein glycosyltransferase subunit STT3B-like [Bombyx mori]	157132108	XM_001662417.1	309	3.05822e-158	Aedes aegypti oligosaccharyl transferase partial mRNA	K07151	STT3	dolichyl-diphosphooligosaccharide--protein glycosyltransferase	http://www.genome.jp/dbget-bin/www_bget?ko:K07151	Q3TDQ1	2716	0	Dolichyl-diphosphooligosaccharide--protein glycosyltransferase subunit STT3B OS=Mus musculus GN=Stt3b PE=1 SV=2	PF02516	Oligosaccharyl transferase STT3 subunit	GO:0006486	protein glycosylation	GO:0004576	oligosaccharyl transferase activity	GO:0016020//GO:0008250	membrane//oligosaccharyltransferase complex	KOG2292	Oligosaccharyltransferase, STT3 subunit
c46475_g2	260	--	--	--	--	--	--	--	--	--	--	--	--	--	--	--	--	--	--	--	--	--	--	--	--	--	--	--	--
c37943_g1	429	--	--	--	--	--	--	--	--	--	--	--	--	--	--	--	--	--	--	--	--	--	--	--	--	--	--	--	--
c10412_g1	242	--	--	--	--	--	--	--	--	--	--	--	--	--	--	--	--	--	--	--	--	--	--	--	--	--	--	--	--
c45725_g1	1694	512914756	XP_004928221.1	934	6.39554e-110	PREDICTED: uncharacterized protein DDB_G0283357-like [Bombyx mori]	--	--	--	--	--	--	--	--	--	--	--	--	--	--	--	--	--	--	--	--	--	--	--
c41325_g1	701	--	--	--	--	--	--	--	--	--	--	--	--	--	--	--	--	--	--	PF01530	Zinc finger, C2HC type	GO:0006355	regulation of transcription, DNA-templated	GO:0008270//GO:0003700	zinc ion binding//sequence-specific DNA binding transcription factor activity	GO:0005634//GO:0005667	nucleus//transcription factor complex	--	--
c88182_g1	224	--	--	--	--	--	--	--	--	--	--	--	--	--	--	--	--	--	--	--	--	--	--	--	--	--	--	--	--
c56454_g1	236	--	--	--	--	--	--	--	--	--	--	--	--	--	--	--	--	--	--	--	--	--	--	--	--	--	--	--	--
c68605_g1	273	--	--	--	--	--	--	--	--	--	--	--	--	--	--	--	--	--	--	--	--	--	--	--	--	--	--	--	--
c23025_g1	313	--	--	--	--	--	--	--	--	--	--	--	--	--	--	--	--	--	--	--	--	--	--	--	--	--	--	--	--
c82284_g1	258	--	--	--	--	--	--	--	--	--	--	--	--	--	--	--	--	--	--	--	--	--	--	--	--	--	--	--	--
c3462_g1	354	357622733	EHJ74144.1	164	3.10545e-11	hypothetical protein KGM_12953 [Danaus plexippus]	--	--	--	--	--	--	--	--	--	--	--	--	--	PF05485	THAP domain	--	--	GO:0003676	nucleic acid binding	--	--	--	--
c45032_g1	1856	357617527	EHJ70841.1	956	1.78923e-118	sugar transporter protein [Danaus plexippus]	--	--	--	--	--	--	--	--	--	B0WC46	369	1.48198e-36	Facilitated trehalose transporter Tret1 OS=Culex quinquefasciatus GN=Tret1 PE=3 SV=1	PF00083//PF07690//PF03839	Sugar (and other) transporter//Major Facilitator Superfamily//Translocation protein Sec62	GO:0055085//GO:0015031	transmembrane transport//protein transport	GO:0008565//GO:0022857	protein transporter activity//transmembrane transporter activity	GO:0016021	integral component of membrane	KOG0254	Predicted transporter (major facilitator superfamily)
c22522_g1	315	--	--	--	--	--	--	--	--	--	--	--	--	--	--	--	--	--	--	--	--	--	--	--	--	--	--	--	--
c60933_g1	240	--	--	--	--	--	--	--	--	--	--	--	--	--	--	--	--	--	--	--	--	--	--	--	--	--	--	--	--
c36074_g2	257	--	--	--	--	--	--	--	--	--	--	--	--	--	--	--	--	--	--	--	--	--	--	--	--	--	--	--	--
c36104_g2	583	--	--	--	--	--	--	--	--	--	--	--	--	--	--	--	--	--	--	--	--	--	--	--	--	--	--	--	--
c40924_g2	287	--	--	--	--	--	--	--	--	--	--	--	--	--	--	--	--	--	--	--	--	--	--	--	--	--	--	--	--
c58671_g1	218	317155090	XP_003190555.1	225	1.55418e-20	protein hob1 [Aspergillus oryzae RIB40]	238504905	XM_002383641.1	212	9.73001e-106	Aspergillus flavus NRRL3357 BAR adaptor protein RVS167, putative, mRNA	--	--	--	--	--	--	--	--	--	--	--	--	--	--	--	--	--	--
c86205_g1	226	--	--	--	--	--	--	--	--	--	--	--	--	--	--	--	--	--	--	--	--	--	--	--	--	--	--	--	--
c53111_g1	2162	296427839	ADH16751.1	1533	0	flavin-dependent monooxygenase FMO1A [Helicoverpa armigera]	--	--	--	--	--	K00485	FMO	dimethylaniline monooxygenase (N-oxide forming)	http://www.genome.jp/dbget-bin/www_bget?ko:K00485	Q8MP06	1203	2.83524e-156	Senecionine N-oxygenase OS=Tyria jacobaeae GN=sno1 PE=1 SV=1	PF03721//PF01593//PF00743//PF00070//PF07992//PF01266//PF05834	UDP-glucose/GDP-mannose dehydrogenase family, NAD binding domain//Flavin containing amine oxidoreductase//Flavin-binding monooxygenase-like//Pyridine nucleotide-disulphide oxidoreductase//Pyridine nucleotide-disulphide oxidoreductase//FAD dependent oxidoreductase//Lycopene cyclase protein	GO:0016117//GO:0055114	carotenoid biosynthetic process//oxidation-reduction process	GO:0004497//GO:0050660//GO:0050661//GO:0016616//GO:0004499//GO:0050662//GO:0016491//GO:0000166//GO:0016705//GO:0051287	monooxygenase activity//flavin adenine dinucleotide binding//NADP binding//oxidoreductase activity, acting on the CH-OH group of donors, NAD or NADP as acceptor//N,N-dimethylaniline monooxygenase activity//coenzyme binding//oxidoreductase activity//nucleotide binding//oxidoreductase activity, acting on paired donors, with incorporation or reduction of molecular oxygen//NAD binding	--	--	KOG1399	Flavin-containing monooxygenase
c37539_g1	281	--	--	--	--	--	--	--	--	--	--	--	--	--	--	--	--	--	--	--	--	--	--	--	--	--	--	--	--
c64927_g1	251	--	--	--	--	--	--	--	--	--	--	--	--	--	--	--	--	--	--	--	--	--	--	--	--	--	--	--	--
c25836_g1	841	--	--	--	--	--	--	--	--	--	--	--	--	--	--	--	--	--	--	--	--	--	--	--	--	--	--	--	--
c41387_g1	1051	--	--	--	--	--	--	--	--	--	--	--	--	--	--	--	--	--	--	PF06495//PF03402	Fruit fly transformer protein//Vomeronasal organ pheromone receptor family, V1R	GO:0006397//GO:0007186//GO:0046660//GO:0007606//GO:0019236	mRNA processing//G-protein coupled receptor signaling pathway//female sex differentiation//sensory perception of chemical stimulus//response to pheromone	GO:0016503	pheromone receptor activity	GO:0016021//GO:0005634	integral component of membrane//nucleus	--	--
c43019_g1	684	--	--	--	--	--	--	--	--	--	--	--	--	--	--	--	--	--	--	--	--	--	--	--	--	--	--	--	--
c51646_g1	3258	389609951	BAM18587.1	807	9.60533e-97	coenzyme q10 biosynthesis protein [Papilio xuthus]	389609950	AK401965.1	224	3.59448e-111	Papilio xuthus mRNA for coenzyme q10 biosynthesis protein, complete cds, sequence id: Px-1953	K06134	COQ7	ubiquinone biosynthesis monooxygenase Coq7	http://www.genome.jp/dbget-bin/www_bget?ko:K06134	Q99807	523	1.30954e-58	Ubiquinone biosynthesis protein COQ7 homolog OS=Homo sapiens GN=COQ7 PE=1 SV=3	PF03232//PF02915	Ubiquinone biosynthesis protein COQ7//Rubrerythrin	GO:0006744//GO:0055114	ubiquinone biosynthetic process//oxidation-reduction process	GO:0046872//GO:0016491	metal ion binding//oxidoreductase activity	--	--	KOG4061	DMQ mono-oxygenase/Ubiquinone biosynthesis protein COQ7/CLK-1/CAT5
c42812_g1	2124	662214437	XP_008481051.1	424	1.85231e-41	PREDICTED: RNA-directed DNA polymerase from mobile element jockey-like [Diaphorina citri]	--	--	--	--	--	--	--	--	--	--	--	--	--	PF05185//PF09553	PRMT5 arginine-N-methyltransferase//Eco47II restriction endonuclease	GO:0006308//GO:0009307//GO:0006479	DNA catabolic process//DNA restriction-modification system//protein methylation	GO:0009036//GO:0003677//GO:0008168	Type II site-specific deoxyribonuclease activity//DNA binding//methyltransferase activity	GO:0009359	Type II site-specific deoxyribonuclease complex	--	--
c17971_g1	378	--	--	--	--	--	--	--	--	--	--	--	--	--	--	--	--	--	--	--	--	--	--	--	--	--	--	--	--
c53457_g3	205	--	--	--	--	--	--	--	--	--	--	--	--	--	--	--	--	--	--	--	--	--	--	--	--	--	--	--	--
c53992_g1	205	--	--	--	--	--	--	--	--	--	--	--	--	--	--	--	--	--	--	--	--	--	--	--	--	--	--	--	--
c86149_g1	385	--	--	--	--	--	--	--	--	--	--	--	--	--	--	--	--	--	--	PF06371	Diaphanous GTPase-binding Domain	GO:0030036	actin cytoskeleton organization	GO:0017048//GO:0003779	Rho GTPase binding//actin binding	--	--	--	--
c36577_g1	381	--	--	--	--	--	--	--	--	--	--	--	--	--	--	--	--	--	--	--	--	--	--	--	--	--	--	--	--
c61989_g1	341	--	--	--	--	--	--	--	--	--	--	--	--	--	--	--	--	--	--	--	--	--	--	--	--	--	--	--	--
c1920_g1	227	--	--	--	--	--	--	--	--	--	--	--	--	--	--	--	--	--	--	--	--	--	--	--	--	--	--	--	--
c79068_g1	895	357618125	EHJ71219.1	585	1.50824e-69	UDP-GlcNAc:alpha-6-D-mannoside beta-1,2-N-acetylglucosaminyltransferase II [Danaus plexippus]	--	--	--	--	--	K00736	MGAT2	alpha-1,6-mannosyl-glycoprotein beta-1,2-N-acetylglucosaminyltransferase	http://www.genome.jp/dbget-bin/www_bget?ko:K00736	O19071	337	2.08759e-34	Alpha-1,6-mannosyl-glycoprotein 2-beta-N-acetylglucosaminyltransferase OS=Sus scrofa GN=MGAT2 PE=3 SV=1	PF05060	N-acetylglucosaminyltransferase II (MGAT2)	GO:0009312	oligosaccharide biosynthetic process	GO:0008455	alpha-1,6-mannosylglycoprotein 2-beta-N-acetylglucosaminyltransferase activity	GO:0005795//GO:0016021	Golgi stack//integral component of membrane	--	--
c59950_g1	446	--	--	--	--	--	--	--	--	--	--	--	--	--	--	--	--	--	--	--	--	--	--	--	--	--	--	--	--
c33399_g1	547	--	--	--	--	--	--	--	--	--	--	--	--	--	--	--	--	--	--	--	--	--	--	--	--	--	--	--	--
c85732_g1	203	--	--	--	--	--	--	--	--	--	--	--	--	--	--	--	--	--	--	--	--	--	--	--	--	--	--	--	--
c54183_g1	2700	--	--	--	--	--	--	--	--	--	--	--	--	--	--	--	--	--	--	--	--	--	--	--	--	--	--	--	--
c27769_g1	1468	--	--	--	--	--	--	--	--	--	--	--	--	--	--	--	--	--	--	PF11593	Mediator complex subunit 3 fungal	GO:0006357	regulation of transcription from RNA polymerase II promoter	GO:0001104	RNA polymerase II transcription cofactor activity	GO:0016592	mediator complex	--	--
c37726_g1	202	--	--	--	--	--	--	--	--	--	--	--	--	--	--	--	--	--	--	--	--	--	--	--	--	--	--	--	--
c10757_g1	366	512931276	XP_004932262.1	336	5.5928e-36	PREDICTED: uncharacterized protein LOC101742907 [Bombyx mori]	--	--	--	--	--	--	--	--	--	P16425	127	1.20962e-07	Putative 115 kDa protein in type-1 retrotransposable element R1DM OS=Drosophila melanogaster GN=R1A1-element\ORF2 PE=4 SV=1	--	--	--	--	--	--	--	--	--	--
c51384_g1	3836	512936309	XP_004933487.1	2622	0	PREDICTED: dynein intermediate chain 2, ciliary-like [Bombyx mori]	462321224	APGK01043341.1	36	1.36656e-06	Dendroctonus ponderosae Seq01043351, whole genome shotgun sequence	K10409	DNAI1	dynein intermediate chain 1, axonemal	http://www.genome.jp/dbget-bin/www_bget?ko:K10409	Q16959	1265	9.32686e-156	Dynein intermediate chain 2, ciliary OS=Heliocidaris crassispina PE=2 SV=1	PF00400//PF00972	WD domain, G-beta repeat//Flavivirus RNA-directed RNA polymerase	GO:0006144	purine nucleobase metabolic process	GO:0005515//GO:0003968//GO:0005524	protein binding//RNA-directed RNA polymerase activity//ATP binding	GO:0031379	RNA-directed RNA polymerase complex	KOG1587	Cytoplasmic dynein intermediate chain
c3102_g1	302	--	--	--	--	--	--	--	--	--	--	--	--	--	--	--	--	--	--	--	--	--	--	--	--	--	--	--	--
c88240_g1	204	--	--	--	--	--	--	--	--	--	--	--	--	--	--	--	--	--	--	--	--	--	--	--	--	--	--	--	--
c72183_g1	208	--	--	--	--	--	--	--	--	--	--	--	--	--	--	--	--	--	--	--	--	--	--	--	--	--	--	--	--
c34048_g1	486	--	--	--	--	--	--	--	--	--	--	--	--	--	--	--	--	--	--	--	--	--	--	--	--	--	--	--	--
c85776_g1	384	--	--	--	--	--	291201229	FP340404.1	73	3.41529e-28	15B14_SfBAC_fin, Spodoptera frugiperda BAC, egg DNA	--	--	--	--	--	--	--	--	--	--	--	--	--	--	--	--	--	--
c43067_g1	349	--	--	--	--	--	--	--	--	--	--	--	--	--	--	--	--	--	--	--	--	--	--	--	--	--	--	--	--
c83343_g1	268	--	--	--	--	--	--	--	--	--	--	--	--	--	--	--	--	--	--	--	--	--	--	--	--	--	--	--	--
c54925_g1	2852	357622083	EHJ73689.1	2021	0	hypothetical protein KGM_14500 [Danaus plexippus]	--	--	--	--	--	K01885	EARS, gltX	glutamyl-tRNA synthetase	http://www.genome.jp/dbget-bin/www_bget?ko:K01885	Q5ZJ66	1152	3.31309e-145	Probable glutamate--tRNA ligase, mitochondrial OS=Gallus gallus GN=EARS2 PE=2 SV=1	PF05699//PF00749	hAT family C-terminal dimerisation region//tRNA synthetases class I (E and Q), catalytic domain	GO:0015994//GO:0006424//GO:0043039	chlorophyll metabolic process//glutamyl-tRNA aminoacylation//tRNA aminoacylation	GO:0005524//GO:0004818//GO:0046983//GO:0016876	ATP binding//glutamate-tRNA ligase activity//protein dimerization activity//ligase activity, forming aminoacyl-tRNA and related compounds	GO:0009332//GO:0005737	glutamate-tRNA ligase complex//cytoplasm	KOG1149	Glutamyl-tRNA synthetase (mitochondrial)
c60268_g1	256	--	--	--	--	--	--	--	--	--	--	--	--	--	--	--	--	--	--	--	--	--	--	--	--	--	--	--	--
c87303_g1	313	--	--	--	--	--	--	--	--	--	--	--	--	--	--	--	--	--	--	--	--	--	--	--	--	--	--	--	--
c55202_g2	524	--	--	--	--	--	--	--	--	--	--	--	--	--	--	--	--	--	--	--	--	--	--	--	--	--	--	--	--
c14632_g1	441	--	--	--	--	--	--	--	--	--	--	--	--	--	--	--	--	--	--	--	--	--	--	--	--	--	--	--	--
c7427_g1	378	--	--	--	--	--	--	--	--	--	--	--	--	--	--	--	--	--	--	--	--	--	--	--	--	--	--	--	--
c8369_g1	491	--	--	--	--	--	--	--	--	--	--	--	--	--	--	--	--	--	--	--	--	--	--	--	--	--	--	--	--
c54690_g2	2147	389611722	BAM19443.1	1694	0	conserved hypothetical protein, partial [Papilio xuthus]	--	--	--	--	--	K08773	RALBP1	RalA-binding protein 1	http://www.genome.jp/dbget-bin/www_bget?ko:K08773	Q9VDG2	608	3.95134e-67	RalA-binding protein 1 OS=Drosophila melanogaster GN=Rlip PE=1 SV=1	PF00620	RhoGAP domain	GO:0007165	signal transduction	--	--	--	--	KOG4370	Ral-GTPase effector RLIP76
c65548_g1	298	--	--	--	--	--	--	--	--	--	--	--	--	--	--	--	--	--	--	--	--	--	--	--	--	--	--	--	--
c74702_g1	461	--	--	--	--	--	--	--	--	--	--	--	--	--	--	--	--	--	--	--	--	--	--	--	--	--	--	--	--
c4954_g1	490	--	--	--	--	--	--	--	--	--	--	--	--	--	--	--	--	--	--	--	--	--	--	--	--	--	--	--	--
c68188_g1	324	--	--	--	--	--	--	--	--	--	--	--	--	--	--	--	--	--	--	--	--	--	--	--	--	--	--	--	--
c740_g2	202	--	--	--	--	--	--	--	--	--	--	--	--	--	--	--	--	--	--	--	--	--	--	--	--	--	--	--	--
c61090_g1	219	--	--	--	--	--	--	--	--	--	--	--	--	--	--	--	--	--	--	--	--	--	--	--	--	--	--	--	--
c4912_g1	286	--	--	--	--	--	--	--	--	--	--	--	--	--	--	--	--	--	--	--	--	--	--	--	--	--	--	--	--
c85915_g1	312	--	--	--	--	--	--	--	--	--	--	--	--	--	--	--	--	--	--	--	--	--	--	--	--	--	--	--	--
c74875_g1	261	--	--	--	--	--	--	--	--	--	--	--	--	--	--	--	--	--	--	--	--	--	--	--	--	--	--	--	--
c70134_g1	261	--	--	--	--	--	--	--	--	--	--	--	--	--	--	--	--	--	--	--	--	--	--	--	--	--	--	--	--
c7604_g1	443	--	--	--	--	--	--	--	--	--	--	--	--	--	--	--	--	--	--	PF10589//PF02438	NADH-ubiquinone oxidoreductase-F iron-sulfur binding region//Late 100kD protein	GO:0019060//GO:0055114	intracellular transport of viral protein in host cell//oxidation-reduction process	--	--	--	--	--	--
c58535_g1	315	--	--	--	--	--	--	--	--	--	--	--	--	--	--	--	--	--	--	--	--	--	--	--	--	--	--	--	--
c70468_g1	231	--	--	--	--	--	--	--	--	--	--	--	--	--	--	--	--	--	--	--	--	--	--	--	--	--	--	--	--
c70279_g1	637	--	--	--	--	--	--	--	--	--	--	--	--	--	--	--	--	--	--	--	--	--	--	--	--	--	--	--	--
c45404_g1	930	--	--	--	--	--	--	--	--	--	--	--	--	--	--	--	--	--	--	--	--	--	--	--	--	--	--	--	--
c53431_g1	3377	512894829	XP_004923524.1	1971	0	PREDICTED: epidermal growth factor receptor kinase substrate 8-like protein 2-like [Bombyx mori]	--	--	--	--	--	K17277	EPS8	epidermal growth factor receptor kinase substrate 8	http://www.genome.jp/dbget-bin/www_bget?ko:K17277	Q08509	375	2.68372e-35	Epidermal growth factor receptor kinase substrate 8 OS=Mus musculus GN=Eps8 PE=1 SV=2	PF00018//PF08416	SH3 domain//Phosphotyrosine-binding domain	--	--	GO:0005515	protein binding	--	--	KOG3557	Epidermal growth factor receptor kinase substrate
c37860_g2	374	--	--	--	--	--	--	--	--	--	--	--	--	--	--	--	--	--	--	--	--	--	--	--	--	--	--	--	--
c56780_g1	218	--	--	--	--	--	--	--	--	--	--	--	--	--	--	--	--	--	--	--	--	--	--	--	--	--	--	--	--
c48623_g1	1723	357615434	EHJ69653.1	791	3.84313e-97	hypothetical protein KGM_18868 [Danaus plexippus]	389612700	AK403533.1	134	2.02057e-61	Papilio xuthus mRNA for unknown unsecreted protein, partial cds, sequence id: Px-1737, expressed in epidermis	--	--	--	--	--	--	--	--	PF00170	bZIP transcription factor	GO:0006355	regulation of transcription, DNA-templated	GO:0003700//GO:0043565	sequence-specific DNA binding transcription factor activity//sequence-specific DNA binding	GO:0005667	transcription factor complex	--	--
c84183_g1	240	--	--	--	--	--	--	--	--	--	--	--	--	--	--	--	--	--	--	--	--	--	--	--	--	--	--	--	--
c85125_g1	213	--	--	--	--	--	--	--	--	--	--	--	--	--	--	--	--	--	--	--	--	--	--	--	--	--	--	--	--
c55975_g1	9453	357614826	EHJ69300.1	179	6.76128e-10	hypothetical protein KGM_08194 [Danaus plexippus]	345548869	JF339040.1	660	0	Ostrinia nubilalis aminopeptidase N3b (apn3b) gene, partial cds; and aminopeptidase N3a (apn3a) and aminopeptidase N3c (apn3c) genes, complete cds	--	--	--	--	--	--	--	--	PF07462	Merozoite surface protein 1 (MSP1) C-terminus	GO:0009405	pathogenesis	--	--	GO:0016020	membrane	KOG2410	Gamma-glutamyltransferase
c42464_g1	2172	389613642	BAM20149.1	553	1.54244e-63	similar to CG3420, partial [Papilio xuthus]	--	--	--	--	--	--	--	--	--	P0C7P0	242	5.3064e-22	CDGSH iron-sulfur domain-containing protein 3, mitochondrial OS=Homo sapiens GN=CISD3 PE=1 SV=1	PF09360	Iron-binding zinc finger CDGSH type	--	--	GO:0051537	2 iron, 2 sulfur cluster binding	GO:0043231	intracellular membrane-bounded organelle	KOG4605	Uncharacterized conserved protein containing CDGSH-type Zn-finger
c41285_g1	366	--	--	--	--	--	--	--	--	--	--	--	--	--	--	--	--	--	--	--	--	--	--	--	--	--	--	--	--
c79373_g1	248	--	--	--	--	--	--	--	--	--	--	--	--	--	--	--	--	--	--	--	--	--	--	--	--	--	--	--	--
c71289_g1	228	--	--	--	--	--	--	--	--	--	--	--	--	--	--	--	--	--	--	--	--	--	--	--	--	--	--	--	--
c59840_g1	238	--	--	--	--	--	--	--	--	--	--	--	--	--	--	--	--	--	--	--	--	--	--	--	--	--	--	--	--
c41844_g1	4597	357629904	EHJ78398.1	1065	2.74799e-129	hypothetical protein KGM_09767 [Danaus plexippus]	346707663	AK377952.1	416	0	Bombyx mori mRNA, clone: ffbm14B23	--	--	--	--	Q5RDF5	452	4.53099e-48	Juxtaposed with another zinc finger protein 1 OS=Pongo abelii GN=JAZF1 PE=2 SV=1	PF00096//PF00137	Zinc finger, C2H2 type//ATP synthase subunit C	GO:0015992//GO:0015991	proton transport//ATP hydrolysis coupled proton transport	GO:0008270//GO:0003676//GO:0046872//GO:0015078	zinc ion binding//nucleic acid binding//metal ion binding//hydrogen ion transmembrane transporter activity	GO:0033177//GO:0005622	proton-transporting two-sector ATPase complex, proton-transporting domain//intracellular	KOG4124	Putative transcriptional repressor regulating G2/M transition
c79406_g1	405	83775271	BAE65393.1	717	4.30222e-89	unnamed protein product [Aspergillus oryzae RIB40]	238508815	XM_002385550.1	375	0	Aspergillus flavus NRRL3357 protein tyrosine phosphatase (Pyp1), putative, mRNA	K18024	PTPN12_18_22	tyrosine-protein phosphatase non-receptor type 12/18/22	http://www.genome.jp/dbget-bin/www_bget?ko:K18024	Q05209	244	6.50585e-23	Tyrosine-protein phosphatase non-receptor type 12 OS=Homo sapiens GN=PTPN12 PE=1 SV=3	PF00102	Protein-tyrosine phosphatase	GO:0006570//GO:0035335//GO:0006470	tyrosine metabolic process//peptidyl-tyrosine dephosphorylation//protein dephosphorylation	GO:0004725	protein tyrosine phosphatase activity	--	--	KOG0789	Protein tyrosine phosphatase
c69572_g1	242	357621763	EHJ73488.1	172	1.02408e-12	TRAS3 [Danaus plexippus]	--	--	--	--	--	--	--	--	--	--	--	--	--	--	--	--	--	--	--	--	--	--	--
c46886_g1	1022	--	--	--	--	--	--	--	--	--	--	--	--	--	--	--	--	--	--	--	--	--	--	--	--	--	--	--	--
c76876_g1	229	--	--	--	--	--	--	--	--	--	--	--	--	--	--	--	--	--	--	--	--	--	--	--	--	--	--	--	--
c49606_g2	410	--	--	--	--	--	--	--	--	--	--	--	--	--	--	--	--	--	--	--	--	--	--	--	--	--	--	--	--
c56914_g1	269	--	--	--	--	--	--	--	--	--	--	--	--	--	--	--	--	--	--	--	--	--	--	--	--	--	--	--	--
c32215_g1	375	--	--	--	--	--	--	--	--	--	--	--	--	--	--	--	--	--	--	--	--	--	--	--	--	--	--	--	--
c11255_g1	361	--	--	--	--	--	--	--	--	--	--	--	--	--	--	--	--	--	--	--	--	--	--	--	--	--	--	--	--
c11060_g1	818	--	--	--	--	--	--	--	--	--	--	--	--	--	--	--	--	--	--	--	--	--	--	--	--	--	--	--	--
c6354_g1	315	--	--	--	--	--	--	--	--	--	--	--	--	--	--	--	--	--	--	--	--	--	--	--	--	--	--	--	--
c47440_g1	1255	512928274	XP_004931539.1	579	5.24198e-63	PREDICTED: nucleolar GTP-binding protein 2-like [Bombyx mori]	--	--	--	--	--	--	--	--	--	Q8HXY9	240	2.47235e-21	Craniofacial development protein 1 OS=Bos taurus GN=CFDP1 PE=2 SV=1	PF00420//PF02459	NADH-ubiquinone/plastoquinone oxidoreductase chain 4L//Adenoviral DNA terminal protein	GO:0042773//GO:0055114//GO:0006260	ATP synthesis coupled electron transport//oxidation-reduction process//DNA replication	GO:0016651//GO:0003677	oxidoreductase activity, acting on NAD(P)H//DNA binding	--	--	KOG4776	Uncharacterized conserved protein BCNT
c31753_g2	269	--	--	--	--	--	--	--	--	--	--	--	--	--	--	--	--	--	--	--	--	--	--	--	--	--	--	--	--
c73689_g1	203	--	--	--	--	--	--	--	--	--	--	--	--	--	--	--	--	--	--	--	--	--	--	--	--	--	--	--	--
c47637_g1	2363	512886340	XP_004921740.1	859	6.14782e-104	PREDICTED: uncharacterized protein LOC101738688 isoform X1 [Bombyx mori]	--	--	--	--	--	--	--	--	--	--	--	--	--	PF04828	Glutathione-dependent formaldehyde-activating enzyme	GO:0008152	metabolic process	GO:0016846	carbon-sulfur lyase activity	--	--	--	--
c44669_g1	366	--	--	--	--	--	--	--	--	--	--	--	--	--	--	--	--	--	--	--	--	--	--	--	--	--	--	--	--
c37904_g1	931	512920638	XP_004929682.1	410	1.91055e-46	PREDICTED: cytochrome c oxidase assembly protein COX16 homolog, mitochondrial-like isoform X1 [Bombyx mori] >gi|512920642|ref|XP_004929683.1| PREDICTED: cytochrome c oxidase assembly protein COX16 homolog, mitochondrial-like isoform X2 [Bombyx mori]	--	--	--	--	--	K18182	COX16	cytochrome c oxidase assembly protein subunit 16	http://www.genome.jp/dbget-bin/www_bget?ko:K18182	Q9CR63	219	1.47473e-20	Cytochrome c oxidase assembly protein COX16 homolog, mitochondrial OS=Mus musculus GN=Cox16 PE=2 SV=1	PF14138	Cytochrome c oxidase assembly protein COX16	--	--	--	--	GO:0031966	mitochondrial membrane	--	--
c58329_g1	220	169776981	XP_001822956.1	345	9.54267e-39	Hsp70 nucleotide exchange factor fes1 [Aspergillus oryzae RIB40] >gi|238494060|ref|XP_002378266.1| Hsp70 nucleotide exchange factor (Fes1), putative [Aspergillus flavus NRRL3357] >gi|121923176|sp|Q2U9E2.1|FES1_ASPOR RecName: Full=Hsp70 nucleotide exchange factor fes1 [Aspergillus oryzae RIB40] >gi|83771693|dbj|BAE61823.1| unnamed protein product [Aspergillus oryzae RIB40] >gi|220694916|gb|EED5125…	317148842	XM_001822904.2	214	7.60264e-107	Aspergillus oryzae RIB40 Hsp70 nucleotide exchange factor fes1, mRNA	--	--	--	--	Q2U9E2	345	2.85874e-40	Hsp70 nucleotide exchange factor fes1 OS=Aspergillus oryzae (strain ATCC 42149 / RIB 40) GN=fes1 PE=3 SV=1	--	--	GO:0006417	regulation of translation	--	--	GO:0005737	cytoplasm	--	--
c2995_g1	256	--	--	--	--	--	--	--	--	--	--	--	--	--	--	--	--	--	--	--	--	--	--	--	--	--	--	--	--
c47726_g1	1362	114050899	NP_001040163.1	894	9.71049e-115	ischemia/reperfusion inducible protein [Bombyx mori] >gi|87248253|gb|ABD36179.1| ischemia/reperfusion inducible protein [Bombyx mori]	--	--	--	--	--	--	--	--	--	Q499R4	460	1.19567e-51	YrdC domain-containing protein, mitochondrial OS=Rattus norvegicus GN=Yrdc PE=2 SV=1	PF00301//PF01300//PF01096//PF02150	Rubredoxin//Telomere recombination//Transcription factor S-II (TFIIS)//RNA polymerases M/15 Kd subunit	GO:0006206//GO:0006144//GO:0006351	pyrimidine nucleobase metabolic process//purine nucleobase metabolic process//transcription, DNA-templated	GO:0003677//GO:0003725//GO:0008270//GO:0005506//GO:0003899//GO:0003676	DNA binding//double-stranded RNA binding//zinc ion binding//iron ion binding//DNA-directed RNA polymerase activity//nucleic acid binding	GO:0005730	nucleolus	KOG3051	RNA binding/translational regulation protein of the SUA5 family
c56481_g1	457	--	--	--	--	--	--	--	--	--	--	--	--	--	--	--	--	--	--	--	--	--	--	--	--	--	--	--	--
c50717_g1	2944	--	--	--	--	--	--	--	--	--	--	--	--	--	--	--	--	--	--	PF08120	Tamulustoxin family	GO:0006810//GO:0009405	transport//pathogenesis	GO:0019870	potassium channel inhibitor activity	GO:0005576	extracellular region	--	--
c9861_g1	444	190702380	ACE75273.1	475	5.42049e-52	retroelement polyprotein [Glyptapanteles flavicoxis]	--	--	--	--	--	--	--	--	--	P0CT39	236	1.59084e-21	Transposon Tf2-6 polyprotein OS=Schizosaccharomyces pombe (strain 972 / ATCC 24843) GN=Tf2-6 PE=3 SV=1	PF05336	Domain of unknown function (DUF718)	GO:0019299//GO:0006259	rhamnose metabolic process//DNA metabolic process	GO:0016857//GO:0003676//GO:0043169	racemase and epimerase activity, acting on carbohydrates and derivatives//nucleic acid binding//cation binding	GO:0005737	cytoplasm	KOG0017	FOG: Transposon-encoded proteins with TYA, reverse transcriptase, integrase domains in various combinations
c54264_g1	1978	357613291	EHJ68420.1	1001	3.51459e-125	putative alcohol dehydrogenase [Danaus plexippus]	--	--	--	--	--	--	--	--	--	Q924D0	236	8.87478e-20	Reticulon-4-interacting protein 1, mitochondrial OS=Mus musculus GN=Rtn4ip1 PE=1 SV=2	PF08240	Alcohol dehydrogenase GroES-like domain	GO:0055114	oxidation-reduction process	GO:0016491	oxidoreductase activity	--	--	KOG1198	Zinc-binding oxidoreductase
c860_g1	286	--	--	--	--	--	--	--	--	--	--	--	--	--	--	--	--	--	--	--	--	--	--	--	--	--	--	--	--
c71194_g1	222	--	--	--	--	--	--	--	--	--	--	--	--	--	--	--	--	--	--	--	--	--	--	--	--	--	--	--	--
c33752_g1	489	357613671	EHJ68643.1	872	5.65761e-111	hypothetical protein KGM_17839 [Danaus plexippus]	--	--	--	--	--	--	--	--	--	Q9VS29	337	1.13215e-34	Down syndrome cell adhesion molecule-like protein Dscam2 OS=Drosophila melanogaster GN=Dscam2 PE=2 SV=3	PF00041	Fibronectin type III domain	--	--	GO:0005515	protein binding	--	--	KOG0613	Projectin/twitchin and related proteins
c6713_g1	239	--	--	--	--	--	--	--	--	--	--	--	--	--	--	--	--	--	--	--	--	--	--	--	--	--	--	--	--
c75116_g1	201	--	--	--	--	--	--	--	--	--	--	--	--	--	--	--	--	--	--	--	--	--	--	--	--	--	--	--	--
c61279_g1	284	--	--	--	--	--	--	--	--	--	--	--	--	--	--	--	--	--	--	--	--	--	--	--	--	--	--	--	--
c24127_g1	611	--	--	--	--	--	--	--	--	--	--	--	--	--	--	--	--	--	--	--	--	--	--	--	--	--	--	--	--
c11897_g1	340	--	--	--	--	--	--	--	--	--	--	--	--	--	--	--	--	--	--	--	--	--	--	--	--	--	--	--	--
c1640_g1	332	--	--	--	--	--	--	--	--	--	--	--	--	--	--	--	--	--	--	--	--	--	--	--	--	--	--	--	--
c86055_g1	733	--	--	--	--	--	--	--	--	--	--	--	--	--	--	--	--	--	--	--	--	--	--	--	--	--	--	--	--
c86516_g1	216	--	--	--	--	--	--	--	--	--	--	--	--	--	--	--	--	--	--	--	--	--	--	--	--	--	--	--	--
c71255_g1	386	--	--	--	--	--	--	--	--	--	--	--	--	--	--	--	--	--	--	--	--	--	--	--	--	--	--	--	--
c16001_g1	222	--	--	--	--	--	--	--	--	--	--	--	--	--	--	--	--	--	--	--	--	--	--	--	--	--	--	--	--
c83835_g1	266	--	--	--	--	--	--	--	--	--	--	--	--	--	--	--	--	--	--	--	--	--	--	--	--	--	--	--	--
c22697_g1	764	114052188	NP_001040463.1	560	1.28952e-69	transcription initiation factor IIA gamma chain [Bombyx mori] >gi|95102994|gb|ABF51438.1| transcription initiation factor IIA gamma chain [Bombyx mori]	308512818	HM449928.1	88	3.25714e-36	Biston betularia transcription initiation factor IIA gamma chain mRNA, partial cds	K03123	TFIIA2, GTF2A2, TOA2	transcription initiation factor TFIIA small subunit	http://www.genome.jp/dbget-bin/www_bget?ko:K03123	P52656	486	4.74597e-60	Transcription initiation factor IIA subunit 2 OS=Drosophila melanogaster GN=TfIIA-S PE=1 SV=1	PF02268//PF02751	Transcription initiation factor IIA, gamma subunit, helical domain//Transcription initiation factor IIA, gamma subunit	GO:0006355//GO:0006413//GO:0006446//GO:0006367	regulation of transcription, DNA-templated//translational initiation//regulation of translational initiation//transcription initiation from RNA polymerase II promoter	GO:0003743	translation initiation factor activity	GO:0005840//GO:0005672	ribosome//transcription factor TFIIA complex	KOG3463	Transcription initiation factor IIA, gamma subunit
c56574_g1	313	--	--	--	--	--	--	--	--	--	--	--	--	--	--	--	--	--	--	--	--	--	--	--	--	--	--	--	--
c55063_g1	525	--	--	--	--	--	--	--	--	--	--	--	--	--	--	--	--	--	--	--	--	--	--	--	--	--	--	--	--
c964_g1	1165	357616499	EHJ70226.1	1086	6.76449e-144	hypothetical protein KGM_00801 [Danaus plexippus]	--	--	--	--	--	--	--	--	--	O94864	153	1.11806e-09	STAGA complex 65 subunit gamma OS=Homo sapiens GN=SUPT7L PE=1 SV=1	PF01442	Apolipoprotein A1/A4/E domain	GO:0006869//GO:0042157	lipid transport//lipoprotein metabolic process	GO:0008289	lipid binding	GO:0005576	extracellular region	--	--
c71926_g1	215	--	--	--	--	--	--	--	--	--	--	--	--	--	--	--	--	--	--	--	--	--	--	--	--	--	--	--	--
c7971_g1	532	--	--	--	--	--	--	--	--	--	--	--	--	--	--	--	--	--	--	--	--	--	--	--	--	--	--	--	--
c23969_g1	530	--	--	--	--	--	--	--	--	--	--	--	--	--	--	--	--	--	--	--	--	--	--	--	--	--	--	--	--
c50682_g1	238	--	--	--	--	--	--	--	--	--	--	--	--	--	--	--	--	--	--	--	--	--	--	--	--	--	--	--	--
c58296_g1	273	--	--	--	--	--	--	--	--	--	--	--	--	--	--	--	--	--	--	--	--	--	--	--	--	--	--	--	--
c4103_g1	1139	--	--	--	--	--	--	--	--	--	--	--	--	--	--	--	--	--	--	PF00531	Death domain	GO:0007165	signal transduction	GO:0005515	protein binding	--	--	--	--
c85753_g1	823	115384680	XP_001208887.1	745	9.06838e-97	40S ribosomal protein S16 [Aspergillus terreus NIH2624] >gi|169783476|ref|XP_001826200.1| 40S ribosomal protein S16 [Aspergillus oryzae RIB40] >gi|238493273|ref|XP_002377873.1| 40S ribosomal protein S16 [Aspergillus flavus NRRL3357] >gi|83774944|dbj|BAE65067.1| unnamed protein product [Aspergillus oryzae RIB40] >gi|114196579|gb|EAU38279.1| 40S ribosomal protein S16 [Aspergillus terreus NIH2624] >…	317157061	XM_001826148.2	808	0	Aspergillus oryzae RIB40 40S ribosomal protein S16, partial mRNA	K02960	RP-S16e, RPS16	small subunit ribosomal protein S16e	http://www.genome.jp/dbget-bin/www_bget?ko:K02960	Q759L8	623	7.48613e-80	40S ribosomal protein S16 OS=Ashbya gossypii (strain ATCC 10895 / CBS 109.51 / FGSC 9923 / NRRL Y-1056) GN=RPS16 PE=3 SV=1	PF00380	Ribosomal protein S9/S16	GO:0006412//GO:0042254	translation//ribosome biogenesis	GO:0003735	structural constituent of ribosome	GO:0005840	ribosome	KOG1753	40S ribosomal protein S16
c55958_g1	4643	512909662	XP_004926976.1	1291	7.17029e-162	PREDICTED: uncharacterized protein LOC101746247 [Bombyx mori]	319918807	AB597004.1	148	9.09511e-69	Ostrinia nubilalis OnubOR5a gene for odorant receptor, complete cds, clone: 11K16	--	--	--	--	--	--	--	--	--	--	--	--	--	--	--	--	--	--
c87056_g1	254	--	--	--	--	--	--	--	--	--	--	--	--	--	--	--	--	--	--	--	--	--	--	--	--	--	--	--	--
c3892_g1	249	--	--	--	--	--	--	--	--	--	--	--	--	--	--	--	--	--	--	--	--	--	--	--	--	--	--	--	--
c74362_g1	306	--	--	--	--	--	--	--	--	--	--	--	--	--	--	--	--	--	--	--	--	--	--	--	--	--	--	--	--
c84622_g1	248	--	--	--	--	--	--	--	--	--	--	--	--	--	--	--	--	--	--	--	--	--	--	--	--	--	--	--	--
c81171_g1	339	--	--	--	--	--	--	--	--	--	--	--	--	--	--	--	--	--	--	PF04647	Accessory gene regulator B	GO:0006508	proteolysis	GO:0008233	peptidase activity	GO:0016020	membrane	--	--
c62034_g1	317	--	--	--	--	--	--	--	--	--	--	--	--	--	--	--	--	--	--	--	--	--	--	--	--	--	--	--	--
c24773_g1	253	--	--	--	--	--	--	--	--	--	--	--	--	--	--	--	--	--	--	--	--	--	--	--	--	--	--	--	--
c66929_g1	203	--	--	--	--	--	--	--	--	--	--	--	--	--	--	--	--	--	--	--	--	--	--	--	--	--	--	--	--
c82618_g1	234	--	--	--	--	--	--	--	--	--	--	--	--	--	--	--	--	--	--	--	--	--	--	--	--	--	--	--	--
c75989_g1	318	--	--	--	--	--	--	--	--	--	--	--	--	--	--	--	--	--	--	--	--	--	--	--	--	--	--	--	--
c32548_g2	253	--	--	--	--	--	--	--	--	--	--	--	--	--	--	--	--	--	--	--	--	--	--	--	--	--	--	--	--
c52621_g1	1699	--	--	--	--	--	--	--	--	--	--	--	--	--	--	--	--	--	--	--	--	--	--	--	--	--	--	--	--
c36265_g1	1003	--	--	--	--	--	--	--	--	--	--	--	--	--	--	--	--	--	--	--	--	--	--	--	--	--	--	--	--
c64355_g1	208	--	--	--	--	--	--	--	--	--	--	--	--	--	--	--	--	--	--	--	--	--	--	--	--	--	--	--	--
c6174_g1	330	--	--	--	--	--	--	--	--	--	--	--	--	--	--	--	--	--	--	--	--	--	--	--	--	--	--	--	--
c8957_g1	602	--	--	--	--	--	--	--	--	--	--	--	--	--	--	--	--	--	--	--	--	--	--	--	--	--	--	--	--
c85817_g1	308	512938093	XP_004933923.1	290	9.66305e-31	PREDICTED: uncharacterized protein LOC101735814, partial [Bombyx mori]	--	--	--	--	--	--	--	--	--	--	--	--	--	--	--	--	--	--	--	--	--	--	--
c66298_g1	378	--	--	--	--	--	--	--	--	--	--	--	--	--	--	--	--	--	--	PF11910	Cyanobacterial and plant NDH-1 subunit O	GO:0006118//GO:0055114	electron transport//oxidation-reduction process	GO:0016655	oxidoreductase activity, acting on NAD(P)H, quinone or similar compound as acceptor	GO:0005886	plasma membrane	--	--
c72652_g1	207	--	--	--	--	--	--	--	--	--	--	--	--	--	--	--	--	--	--	--	--	--	--	--	--	--	--	--	--
c56850_g1	219	--	--	--	--	--	--	--	--	--	--	--	--	--	--	--	--	--	--	--	--	--	--	--	--	--	--	--	--
c23597_g1	384	--	--	--	--	--	--	--	--	--	--	--	--	--	--	--	--	--	--	--	--	--	--	--	--	--	--	--	--
c1850_g1	348	--	--	--	--	--	--	--	--	--	--	--	--	--	--	--	--	--	--	--	--	--	--	--	--	--	--	--	--
c70073_g1	572	--	--	--	--	--	--	--	--	--	--	--	--	--	--	--	--	--	--	--	--	--	--	--	--	--	--	--	--
c74248_g1	307	--	--	--	--	--	--	--	--	--	--	--	--	--	--	--	--	--	--	--	--	--	--	--	--	--	--	--	--
c22133_g1	554	--	--	--	--	--	--	--	--	--	--	--	--	--	--	--	--	--	--	--	--	--	--	--	--	--	--	--	--
c57778_g1	271	--	--	--	--	--	--	--	--	--	--	--	--	--	--	--	--	--	--	--	--	--	--	--	--	--	--	--	--
c46578_g1	2138	512922199	XP_004930062.1	1217	8.13641e-160	PREDICTED: alkaline ceramidase-like isoform X1 [Bombyx mori]	--	--	--	--	--	K01441	ACER, ASAH3	alkaline ceramidase	http://www.genome.jp/dbget-bin/www_bget?ko:K01441	Q9VIP7	834	7.24418e-104	Alkaline ceramidase OS=Drosophila melanogaster GN=bwa PE=2 SV=2	PF05875	Ceramidase	GO:0006672//GO:0006807	ceramide metabolic process//nitrogen compound metabolic process	GO:0016811	hydrolase activity, acting on carbon-nitrogen (but not peptide) bonds, in linear amides	GO:0016021	integral component of membrane	KOG2329	Alkaline ceramidase
c12315_g2	293	--	--	--	--	--	--	--	--	--	--	--	--	--	--	--	--	--	--	--	--	--	--	--	--	--	--	--	--
c76924_g1	230	--	--	--	--	--	--	--	--	--	--	--	--	--	--	--	--	--	--	--	--	--	--	--	--	--	--	--	--
c6841_g1	243	--	--	--	--	--	--	--	--	--	--	--	--	--	--	--	--	--	--	--	--	--	--	--	--	--	--	--	--
c55982_g1	4593	357616541	EHJ70254.1	4424	0	putative zinc finger protein [Danaus plexippus]	--	--	--	--	--	K06062	PCAF, KAT2, GCN5	histone acetyltransferase	http://www.genome.jp/dbget-bin/www_bget?ko:K06062	Q9NRL2	508	2.52721e-50	Bromodomain adjacent to zinc finger domain protein 1A OS=Homo sapiens GN=BAZ1A PE=1 SV=2	PF00628//PF00439//PF09339	PHD-finger//Bromodomain//IclR helix-turn-helix domain	GO:0006355	regulation of transcription, DNA-templated	GO:0005515//GO:0043169//GO:0003677	protein binding//cation binding//DNA binding	--	--	KOG1245	Chromatin remodeling complex WSTF-ISWI, large subunit (contains heterochromatin localization, PHD and BROMO domains)
c45030_g1	203	357610721	EHJ67113.1	121	6.45602e-07	hypothetical protein KGM_07541 [Danaus plexippus]	--	--	--	--	--	--	--	--	--	--	--	--	--	--	--	--	--	--	--	--	--	--	--
c33298_g1	300	--	--	--	--	--	--	--	--	--	--	--	--	--	--	--	--	--	--	--	--	--	--	--	--	--	--	--	--
c75309_g1	220	--	--	--	--	--	--	--	--	--	--	--	--	--	--	--	--	--	--	--	--	--	--	--	--	--	--	--	--
c51469_g4	349	--	--	--	--	--	--	--	--	--	--	--	--	--	--	--	--	--	--	--	--	--	--	--	--	--	--	--	--
c15957_g1	552	--	--	--	--	--	--	--	--	--	--	--	--	--	--	--	--	--	--	--	--	--	--	--	--	--	--	--	--
c39085_g1	779	158962507	BAF91714.1	409	1.21084e-46	chemosensory protein [Papilio xuthus]	--	--	--	--	--	--	--	--	--	Q9W1C9	239	2.8157e-23	Ejaculatory bulb-specific protein 3 OS=Drosophila melanogaster GN=PebIII PE=1 SV=2	--	--	--	--	--	--	--	--	--	--
c8200_g1	294	--	--	--	--	--	--	--	--	--	--	--	--	--	--	--	--	--	--	--	--	--	--	--	--	--	--	--	--
c73050_g1	220	--	--	--	--	--	--	--	--	--	--	--	--	--	--	--	--	--	--	--	--	--	--	--	--	--	--	--	--
c40181_g1	3435	512922785	XP_004930202.1	2449	0	PREDICTED: probable leucine--tRNA ligase, mitochondrial-like [Bombyx mori]	429241741	NM_001018467.2	42	5.64698e-10	Schizosaccharomyces pombe 972h- mitochondrial leucine-tRNA ligase (predicted) (SPAC4G8.09), mRNA	K01869	LARS, leuS	leucyl-tRNA synthetase	http://www.genome.jp/dbget-bin/www_bget?ko:K01869	Q8VDC0	1257	1.99101e-153	Probable leucine--tRNA ligase, mitochondrial OS=Mus musculus GN=Lars2 PE=1 SV=1	PF08264//PF09334//PF13603//PF00133	Anticodon-binding domain of tRNA//tRNA synthetases class I (M)//Leucyl-tRNA synthetase, Domain 2//tRNA synthetases class I (I, L, M and V)	GO:0006418	tRNA aminoacylation for protein translation	GO:0002161//GO:0000166//GO:0004812//GO:0005524	aminoacyl-tRNA editing activity//nucleotide binding//aminoacyl-tRNA ligase activity//ATP binding	--	--	KOG0435	Leucyl-tRNA synthetase
c43584_g1	2519	357612638	EHJ68095.1	619	1.19069e-69	hypothetical protein KGM_02923 [Danaus plexippus]	--	--	--	--	--	--	--	--	--	--	--	--	--	--	--	--	--	--	--	--	--	--	--
c63004_g1	210	--	--	--	--	--	--	--	--	--	--	--	--	--	--	--	--	--	--	--	--	--	--	--	--	--	--	--	--
c52570_g1	3804	357623267	EHJ74492.1	921	4.09874e-109	hypothetical protein KGM_18979 [Danaus plexippus]	--	--	--	--	--	K16912	LAS1	ribosomal biogenesis protein LAS1	http://www.genome.jp/dbget-bin/www_bget?ko:K16912	Q9Y4W2	201	2.28568e-14	Ribosomal biogenesis protein LAS1L OS=Homo sapiens GN=LAS1L PE=1 SV=2	--	--	--	--	--	--	--	--	KOG2425	Nuclear protein involved in cell morphogenesis and cell surface growth
c38193_g1	517	512934812	XP_004933123.1	437	5.00708e-49	PREDICTED: homeobox protein bagpipe-like [Bombyx mori]	--	--	--	--	--	--	--	--	--	--	--	--	--	--	--	--	--	--	--	--	--	--	--
c11359_g1	303	512934273	XP_004932995.1	142	2.97489e-08	PREDICTED: uncharacterized protein LOC101740474 [Bombyx mori]	--	--	--	--	--	--	--	--	--	--	--	--	--	--	--	--	--	--	--	--	--	--	--
c35886_g1	416	--	--	--	--	--	--	--	--	--	--	--	--	--	--	--	--	--	--	--	--	--	--	--	--	--	--	--	--
c61037_g1	245	--	--	--	--	--	--	--	--	--	--	--	--	--	--	--	--	--	--	--	--	--	--	--	--	--	--	--	--
c39796_g1	340	--	--	--	--	--	--	--	--	--	--	--	--	--	--	--	--	--	--	--	--	--	--	--	--	--	--	--	--
c14274_g1	529	--	--	--	--	--	--	--	--	--	--	--	--	--	--	--	--	--	--	PF00069	Protein kinase domain	GO:0006468	protein phosphorylation	GO:0005524//GO:0004672	ATP binding//protein kinase activity	--	--	--	--
c53127_g3	598	--	--	--	--	--	--	--	--	--	--	--	--	--	--	--	--	--	--	--	--	--	--	--	--	--	--	--	--
c24327_g1	620	112984298	NP_001037223.1	809	2.26619e-107	ribosomal protein L21 [Bombyx mori] >gi|54609233|gb|AAV34832.1| ribosomal protein L21 [Bombyx mori]	268306475	GU084326.1	345	3.57102e-179	Manduca sexta ribosomal protein L21 (rpl21) mRNA, complete cds	K02889	RP-L21e, RPL21	large subunit ribosomal protein L21e	http://www.genome.jp/dbget-bin/www_bget?ko:K02889	P46778	582	1.87856e-74	60S ribosomal protein L21 OS=Homo sapiens GN=RPL21 PE=1 SV=2	PF01157	Ribosomal protein L21e	GO:0006412//GO:0042254	translation//ribosome biogenesis	GO:0003735	structural constituent of ribosome	GO:0005840//GO:0005622	ribosome//intracellular	KOG1732	60S ribosomal protein L21
c59979_g1	470	357618193	EHJ71270.1	260	9.317e-26	hypothetical protein KGM_11840 [Danaus plexippus]	--	--	--	--	--	--	--	--	--	--	--	--	--	--	--	--	--	--	--	--	--	--	--
c83813_g1	273	--	--	--	--	--	--	--	--	--	--	--	--	--	--	--	--	--	--	--	--	--	--	--	--	--	--	--	--
c48781_g1	3667	33327424	AAQ09035.1	1395	5.37787e-170	Eag K+ channel [Manduca sexta]	33327423	AF528521.1	719	0	Manduca sexta Eag K+ channel mRNA, complete cds	K05322	KCNHN	potassium voltage-gated channel Eag-related subfamily H, invertebrate	http://www.genome.jp/dbget-bin/www_bget?ko:K05322	Q02280	1244	4.50752e-148	Potassium voltage-gated channel protein eag OS=Drosophila melanogaster GN=eag PE=1 SV=2	PF00520	Ion transport protein	GO:0055085//GO:0000160//GO:0006355//GO:0023014//GO:0016310//GO:0006813//GO:0006811	transmembrane transport//phosphorelay signal transduction system//regulation of transcription, DNA-templated//signal transduction by phosphorylation//phosphorylation//potassium ion transport//ion transport	GO:0005216//GO:0000155//GO:0005249	ion channel activity//phosphorelay sensor kinase activity//voltage-gated potassium channel activity	GO:0009365//GO:0008076//GO:0016021//GO:0016020	protein histidine kinase complex//voltage-gated potassium channel complex//integral component of membrane//membrane	KOG0501	K+-channel KCNQ
c9112_g1	257	--	--	--	--	--	--	--	--	--	--	--	--	--	--	--	--	--	--	--	--	--	--	--	--	--	--	--	--
c71385_g1	221	--	--	--	--	--	--	--	--	--	--	--	--	--	--	--	--	--	--	--	--	--	--	--	--	--	--	--	--
c16070_g1	203	--	--	--	--	--	--	--	--	--	--	--	--	--	--	--	--	--	--	--	--	--	--	--	--	--	--	--	--
c23583_g1	811	--	--	--	--	--	--	--	--	--	--	--	--	--	--	--	--	--	--	--	--	--	--	--	--	--	--	--	--
c51691_g1	796	357622110	EHJ73711.1	508	3.37568e-58	hypothetical protein KGM_17690 [Danaus plexippus]	--	--	--	--	--	--	--	--	--	--	--	--	--	--	--	--	--	--	--	--	--	--	--
c35684_g1	1035	512936412	XP_004933513.1	1084	2.70364e-140	PREDICTED: glutamate receptor ionotropic, delta-1-like [Bombyx mori]	--	--	--	--	--	--	--	--	--	P34299	156	5.40933e-10	Glutamate receptor 1 OS=Caenorhabditis elegans GN=glr-1 PE=1 SV=2	PF00497//PF00060	Bacterial extracellular solute-binding proteins, family 3//Ligand-gated ion channel	GO:0006811//GO:0007268//GO:0007165//GO:0006810	ion transport//synaptic transmission//signal transduction//transport	GO:0005215//GO:0004970//GO:0005234	transporter activity//ionotropic glutamate receptor activity//extracellular-glutamate-gated ion channel activity	GO:0016020	membrane	KOG1052	Glutamate-gated kainate-type ion channel receptor subunit GluR5 and related subunits
c26868_g1	228	--	--	--	--	--	--	--	--	--	--	--	--	--	--	--	--	--	--	--	--	--	--	--	--	--	--	--	--
c72011_g1	216	--	--	--	--	--	--	--	--	--	--	--	--	--	--	--	--	--	--	--	--	--	--	--	--	--	--	--	--
c75359_g1	255	357621481	EHJ73295.1	188	1.49259e-15	serine protease [Danaus plexippus]	--	--	--	--	--	--	--	--	--	--	--	--	--	PF00089	Trypsin	GO:0006508	proteolysis	GO:0003824//GO:0004252	catalytic activity//serine-type endopeptidase activity	--	--	--	--
c57763_g1	228	--	--	--	--	--	--	--	--	--	--	--	--	--	--	--	--	--	--	--	--	--	--	--	--	--	--	--	--
c15135_g1	302	--	--	--	--	--	--	--	--	--	--	--	--	--	--	--	--	--	--	--	--	--	--	--	--	--	--	--	--
c47644_g3	387	--	--	--	--	--	438386	U04223.1	37	3.54335e-08	Ostrinia nubilalis On25 alpha-amylase (amy) gene, partial cds	--	--	--	--	--	--	--	--	--	--	--	--	--	--	--	--	--	--
c48557_g1	5667	512887376	XP_004921914.1	1427	3.05309e-172	PREDICTED: uncharacterized protein LOC101743910 [Bombyx mori]	--	--	--	--	--	--	--	--	--	P21328	493	5.05684e-49	RNA-directed DNA polymerase from mobile element jockey OS=Drosophila melanogaster GN=pol PE=1 SV=1	PF00075//PF00098//PF12106//PF00078	RNase H//Zinc knuckle//Colicin C terminal ribonuclease domain//Reverse transcriptase (RNA-dependent DNA polymerase)	GO:0051252//GO:0006278	regulation of RNA metabolic process//RNA-dependent DNA replication	GO:0004540//GO:0003964//GO:0003723//GO:0003676//GO:0008270//GO:0004523	ribonuclease activity//RNA-directed DNA polymerase activity//RNA binding//nucleic acid binding//zinc ion binding//RNA-DNA hybrid ribonuclease activity	--	--	KOG1075	FOG: Reverse transcriptase
c60421_g1	232	--	--	--	--	--	--	--	--	--	--	--	--	--	--	--	--	--	--	--	--	--	--	--	--	--	--	--	--
c22863_g1	622	--	--	--	--	--	--	--	--	--	--	--	--	--	--	--	--	--	--	--	--	--	--	--	--	--	--	--	--
c87928_g1	207	--	--	--	--	--	--	--	--	--	--	--	--	--	--	--	--	--	--	--	--	--	--	--	--	--	--	--	--
c67309_g1	348	--	--	--	--	--	--	--	--	--	--	--	--	--	--	--	--	--	--	--	--	--	--	--	--	--	--	--	--
c19926_g1	314	--	--	--	--	--	--	--	--	--	--	--	--	--	--	--	--	--	--	--	--	--	--	--	--	--	--	--	--
c30661_g1	1221	--	--	--	--	--	--	--	--	--	--	--	--	--	--	--	--	--	--	--	--	--	--	--	--	--	--	--	--
c54503_g2	285	--	--	--	--	--	--	--	--	--	--	--	--	--	--	--	--	--	--	--	--	--	--	--	--	--	--	--	--
c79313_g1	223	--	--	--	--	--	--	--	--	--	--	--	--	--	--	--	--	--	--	--	--	--	--	--	--	--	--	--	--
c75804_g1	245	190702585	ACE75468.1	233	1.4515e-20	reverse transcriptase and recombinase [Glyptapanteles indiensis]	--	--	--	--	--	--	--	--	--	--	--	--	--	--	--	GO:0006259	DNA metabolic process	--	--	--	--	--	--
c63067_g1	562	--	--	--	--	--	--	--	--	--	--	--	--	--	--	--	--	--	--	--	--	--	--	--	--	--	--	--	--
c9731_g1	332	--	--	--	--	--	--	--	--	--	--	--	--	--	--	--	--	--	--	--	--	--	--	--	--	--	--	--	--
c43791_g1	1139	--	--	--	--	--	--	--	--	--	--	--	--	--	--	--	--	--	--	--	--	--	--	--	--	--	--	--	--
c60226_g1	248	--	--	--	--	--	--	--	--	--	--	--	--	--	--	--	--	--	--	--	--	--	--	--	--	--	--	--	--
c48680_g1	1318	512910761	XP_004927250.1	310	1.46063e-30	PREDICTED: uncharacterized protein LOC101735880 [Bombyx mori]	--	--	--	--	--	--	--	--	--	--	--	--	--	--	--	--	--	--	--	--	--	--	--
c66969_g1	209	--	--	--	--	--	--	--	--	--	--	--	--	--	--	--	--	--	--	--	--	--	--	--	--	--	--	--	--
c44903_g1	1249	546680558	ERL90811.1	206	6.62356e-16	hypothetical protein D910_08157, partial [Dendroctonus ponderosae]	--	--	--	--	--	--	--	--	--	--	--	--	--	--	--	--	--	--	--	--	--	--	--
c54617_g1	1615	--	--	--	--	--	185050560	AP009027.1	61	7.19837e-21	Bombyx mori genomic DNA, chromosome 17, BAC clone:517G19, complete sequence	--	--	--	--	--	--	--	--	--	--	--	--	--	--	--	--	--	--
c422_g1	263	--	--	--	--	--	--	--	--	--	--	--	--	--	--	--	--	--	--	--	--	--	--	--	--	--	--	--	--
c52421_g1	2599	--	--	--	--	--	--	--	--	--	--	--	--	--	--	--	--	--	--	--	--	--	--	--	--	--	--	--	--
c87024_g1	216	--	--	--	--	--	--	--	--	--	--	--	--	--	--	--	--	--	--	--	--	--	--	--	--	--	--	--	--
c38624_g1	724	357616439	EHJ70192.1	1009	3.60567e-132	hypothetical protein KGM_17953 [Danaus plexippus]	--	--	--	--	--	--	--	--	--	O00445	318	1.50234e-32	Synaptotagmin-5 OS=Homo sapiens GN=SYT5 PE=2 SV=2	PF00168	C2 domain	GO:0006810	transport	GO:0005215//GO:0005515	transporter activity//protein binding	GO:0008021//GO:0016020	synaptic vesicle//membrane	KOG1028	Ca2+-dependent phospholipid-binding protein Synaptotagmin, required for synaptic vesicle and secretory granule exocytosis
c83736_g1	210	--	--	--	--	--	--	--	--	--	--	--	--	--	--	--	--	--	--	--	--	--	--	--	--	--	--	--	--
c3142_g1	288	--	--	--	--	--	--	--	--	--	--	--	--	--	--	--	--	--	--	--	--	--	--	--	--	--	--	--	--
c3691_g1	447	--	--	--	--	--	--	--	--	--	--	--	--	--	--	--	--	--	--	--	--	--	--	--	--	--	--	--	--
c18324_g1	259	--	--	--	--	--	--	--	--	--	--	--	--	--	--	--	--	--	--	--	--	--	--	--	--	--	--	--	--
c65168_g1	388	--	--	--	--	--	--	--	--	--	--	--	--	--	--	--	--	--	--	--	--	--	--	--	--	--	--	--	--
c70778_g1	303	--	--	--	--	--	--	--	--	--	--	--	--	--	--	--	--	--	--	--	--	--	--	--	--	--	--	--	--
c1147_g1	388	--	--	--	--	--	--	--	--	--	--	--	--	--	--	--	--	--	--	--	--	--	--	--	--	--	--	--	--
c6624_g1	287	--	--	--	--	--	--	--	--	--	--	--	--	--	--	--	--	--	--	--	--	--	--	--	--	--	--	--	--
c19057_g1	265	190702380	ACE75273.1	330	1.92021e-33	retroelement polyprotein [Glyptapanteles flavicoxis]	--	--	--	--	--	--	--	--	--	--	--	--	--	--	--	GO:0015074//GO:0006278	DNA integration//RNA-dependent DNA replication	GO:0008270//GO:0003723//GO:0003964//GO:0046872	zinc ion binding//RNA binding//RNA-directed DNA polymerase activity//metal ion binding	--	--	--	--
c28800_g1	225	--	--	--	--	--	--	--	--	--	--	--	--	--	--	--	--	--	--	--	--	--	--	--	--	--	--	--	--
c63434_g1	281	--	--	--	--	--	--	--	--	--	--	--	--	--	--	--	--	--	--	--	--	--	--	--	--	--	--	--	--
c81344_g1	270	--	--	--	--	--	--	--	--	--	--	--	--	--	--	--	--	--	--	--	--	--	--	--	--	--	--	--	--
c59850_g1	385	--	--	--	--	--	--	--	--	--	--	--	--	--	--	--	--	--	--	--	--	--	--	--	--	--	--	--	--
c79638_g1	234	--	--	--	--	--	--	--	--	--	--	--	--	--	--	--	--	--	--	--	--	--	--	--	--	--	--	--	--
c45939_g1	1427	327420474	AEA76313.1	753	5.83571e-92	astacin [Mamestra configurata]	--	--	--	--	--	--	--	--	--	P55112	274	1.41841e-25	Zinc metalloproteinase nas-4 OS=Caenorhabditis elegans GN=nas-4 PE=2 SV=4	PF01400	Astacin (Peptidase family M12A)	GO:0006508	proteolysis	GO:0004222//GO:0043169//GO:0008237	metalloendopeptidase activity//cation binding//metallopeptidase activity	--	--	KOG3714	Meprin A metalloprotease
c79815_g1	448	--	--	--	--	--	--	--	--	--	--	--	--	--	--	--	--	--	--	--	--	--	--	--	--	--	--	--	--
c43153_g1	929	--	--	--	--	--	--	--	--	--	--	--	--	--	--	--	--	--	--	PF05669	SOH1	GO:0006355	regulation of transcription, DNA-templated	GO:0001104	RNA polymerase II transcription cofactor activity	GO:0016592	mediator complex	--	--
c39877_g1	3147	512921696	XP_004929937.1	1963	0	PREDICTED: sulfhydryl oxidase 1-like [Bombyx mori]	--	--	--	--	--	--	--	--	--	Q8JGM4	738	2.99527e-82	Sulfhydryl oxidase 1 OS=Gallus gallus GN=QSOX1 PE=1 SV=1	PF00085//PF04777	Thioredoxin//Erv1 / Alr family	GO:0055114//GO:0045454	oxidation-reduction process//cell redox homeostasis	GO:0016972	thiol oxidase activity	--	--	KOG0191	Thioredoxin/protein disulfide isomerase
c36234_g1	481	--	--	--	--	--	--	--	--	--	--	--	--	--	--	--	--	--	--	--	--	--	--	--	--	--	--	--	--
c69284_g1	225	--	--	--	--	--	--	--	--	--	--	--	--	--	--	--	--	--	--	--	--	--	--	--	--	--	--	--	--
c21901_g1	477	--	--	--	--	--	--	--	--	--	--	--	--	--	--	--	--	--	--	--	--	--	--	--	--	--	--	--	--
c40440_g1	397	308464865	XP_003094696.1	310	4.11602e-30	hypothetical protein CRE_27833 [Caenorhabditis remanei] >gi|308247028|gb|EFO90980.1| hypothetical protein CRE_27833 [Caenorhabditis remanei]	--	--	--	--	--	--	--	--	--	--	--	--	--	--	--	--	--	--	--	--	--	--	--
c41250_g1	763	56462362	AAV91464.1	175	2.43108e-13	hypothetical protein 35 [Lonomia obliqua]	--	--	--	--	--	--	--	--	--	--	--	--	--	--	--	--	--	--	--	--	--	--	--
c24346_g1	223	--	--	--	--	--	--	--	--	--	--	--	--	--	--	--	--	--	--	--	--	--	--	--	--	--	--	--	--
c70060_g1	201	--	--	--	--	--	--	--	--	--	--	--	--	--	--	--	--	--	--	--	--	--	--	--	--	--	--	--	--
c8587_g1	227	--	--	--	--	--	--	--	--	--	--	--	--	--	--	--	--	--	--	--	--	--	--	--	--	--	--	--	--
c45399_g1	2002	512932824	XP_004932639.1	1537	0	PREDICTED: monocarboxylate transporter 10-like [Bombyx mori]	346707202	AK380603.1	557	0	Bombyx mori mRNA, clone: fufe04N21	--	--	--	--	A1L1W9	169	3.43345e-11	Monocarboxylate transporter 10 OS=Danio rerio GN=slc16a10 PE=2 SV=1	PF07690	Major Facilitator Superfamily	GO:0055085	transmembrane transport	--	--	GO:0016021	integral component of membrane	--	--
c73065_g1	290	--	--	--	--	--	--	--	--	--	--	--	--	--	--	--	--	--	--	PF09726	Transmembrane protein	--	--	--	--	GO:0016021	integral component of membrane	--	--
c48513_g1	2623	357607056	EHJ65337.1	3939	0	hypothetical protein KGM_11400 [Danaus plexippus]	291201263	FP340438.1	1000	0	43E14_HaBAC_fin, Helicoverpa armigera BAC, pupae DNA	--	--	--	--	A6H8I2	2385	0	Small G protein signaling modulator 3 homolog OS=Xenopus laevis GN=sgsm3 PE=2 SV=1	PF00566//PF00018	Rab-GTPase-TBC domain//SH3 domain	GO:0032313//GO:0032851	regulation of Rab GTPase activity//positive regulation of Rab GTPase activity	GO:0005515//GO:0005097	protein binding//Rab GTPase activator activity	GO:0005622	intracellular	KOG2222	Uncharacterized conserved protein, contains TBC, SH3 and RUN domains
c54105_g2	5295	512914397	XP_004928132.1	2687	0	PREDICTED: MAGUK p55 subfamily member 5-like [Bombyx mori]	512914396	XM_004928075.1	670	0	PREDICTED: Bombyx mori MAGUK p55 subfamily member 5-like (LOC101742023), mRNA	K06091	MPP5, PALS1	MAGUK p55 subfamily member 5	http://www.genome.jp/dbget-bin/www_bget?ko:K06091	Q9JLB2	1244	9.06192e-150	MAGUK p55 subfamily member 5 OS=Mus musculus GN=Mpp5 PE=1 SV=1	PF00595//PF02252//PF05210//PF13180//PF00625//PF00018	PDZ domain (Also known as DHR or GLGF)//Proteasome activator pa28 beta subunit//Sprouty protein (Spry)//PDZ domain//Guanylate kinase//SH3 domain	GO:0009966//GO:0007275	regulation of signal transduction//multicellular organismal development	GO:0005515	protein binding	GO:0016020//GO:0008537	membrane//proteasome activator complex	KOG0609	Calcium/calmodulin-dependent serine protein kinase/membrane-associated guanylate kinase
c42280_g1	387	--	--	--	--	--	--	--	--	--	--	--	--	--	--	--	--	--	--	--	--	--	--	--	--	--	--	--	--
c2966_g1	435	--	--	--	--	--	--	--	--	--	--	--	--	--	--	--	--	--	--	--	--	--	--	--	--	--	--	--	--
c47911_g1	1632	357601756	EHJ63140.1	163	6.94564e-09	plekhh1 [Danaus plexippus]	--	--	--	--	--	--	--	--	--	--	--	--	--	--	--	--	--	GO:0005543	phospholipid binding	GO:0005856	cytoskeleton	--	--
c60814_g1	241	--	--	--	--	--	--	--	--	--	--	--	--	--	--	--	--	--	--	--	--	--	--	--	--	--	--	--	--
c68666_g1	234	357617187	EHJ70635.1	133	2.9195e-07	hypothetical protein KGM_15031 [Danaus plexippus]	--	--	--	--	--	--	--	--	--	--	--	--	--	--	--	--	--	--	--	--	--	--	--
c61206_g1	201	--	--	--	--	--	--	--	--	--	--	--	--	--	--	--	--	--	--	--	--	--	--	--	--	--	--	--	--
c85511_g1	931	512919967	XP_004929514.1	1423	0	PREDICTED: glucose dehydrogenase [acceptor]-like [Bombyx mori]	--	--	--	--	--	K00108	E1.1.99.1, betA, CHDH	choline dehydrogenase	http://www.genome.jp/dbget-bin/www_bget?ko:K00108	P18173	553	1.44957e-63	Glucose dehydrogenase [FAD, quinone] OS=Drosophila melanogaster GN=Gld PE=3 SV=3	PF02254//PF00732//PF05834//PF01266//PF07992	TrkA-N domain//GMC oxidoreductase//Lycopene cyclase protein//FAD dependent oxidoreductase//Pyridine nucleotide-disulphide oxidoreductase	GO:0055114//GO:0006813//GO:0016117	oxidation-reduction process//potassium ion transport//carotenoid biosynthetic process	GO:0016705//GO:0016614//GO:0050660//GO:0016491	oxidoreductase activity, acting on paired donors, with incorporation or reduction of molecular oxygen//oxidoreductase activity, acting on CH-OH group of donors//flavin adenine dinucleotide binding//oxidoreductase activity	--	--	--	--
c37966_g1	2055	--	--	--	--	--	--	--	--	--	--	--	--	--	--	--	--	--	--	PF04509	CheC-like family	--	--	GO:0016787	hydrolase activity	--	--	--	--
c53775_g1	702	--	--	--	--	--	--	--	--	--	--	--	--	--	--	--	--	--	--	--	--	--	--	--	--	--	--	--	--
c76012_g1	281	--	--	--	--	--	--	--	--	--	--	--	--	--	--	--	--	--	--	--	--	--	--	--	--	--	--	--	--
c66244_g1	243	--	--	--	--	--	--	--	--	--	--	--	--	--	--	--	--	--	--	--	--	--	--	--	--	--	--	--	--
c19546_g1	212	--	--	--	--	--	--	--	--	--	--	--	--	--	--	--	--	--	--	--	--	--	--	--	--	--	--	--	--
c59216_g1	399	317143587	XP_001819566.2	721	1.11175e-90	catalase [Aspergillus oryzae RIB40]	317143586	XM_001819514.2	372	0	Aspergillus oryzae RIB40 catalase, mRNA	K03781	katE, CAT, catB, srpA	catalase	http://www.genome.jp/dbget-bin/www_bget?ko:K03781	P15202	427	8.35772e-49	Peroxisomal catalase A OS=Saccharomyces cerevisiae (strain ATCC 204508 / S288c) GN=CTA1 PE=1 SV=1	PF00199	Catalase	GO:0006568//GO:0015947//GO:0006804//GO:0006979//GO:0055114	tryptophan metabolic process//methane metabolic process//peroxidase reaction//response to oxidative stress//oxidation-reduction process	GO:0004096//GO:0020037	catalase activity//heme binding	--	--	KOG0047	Catalase
c22288_g1	367	--	--	--	--	--	--	--	--	--	--	--	--	--	--	--	--	--	--	--	--	--	--	--	--	--	--	--	--
c40277_g1	261	--	--	--	--	--	--	--	--	--	--	--	--	--	--	--	--	--	--	--	--	--	--	--	--	--	--	--	--
c57804_g1	218	--	--	--	--	--	--	--	--	--	--	--	--	--	--	--	--	--	--	--	--	--	--	--	--	--	--	--	--
c81042_g1	282	--	--	--	--	--	--	--	--	--	--	--	--	--	--	--	--	--	--	--	--	--	--	--	--	--	--	--	--
c52348_g1	2715	512907297	XP_004926407.1	2584	0	PREDICTED: solute carrier family 23 member 2-like [Bombyx mori]	--	--	--	--	--	K14611	SLC23A1_2, SVCT1_2	solute carrier family 23 (nucleobase transporter), member 1/2	http://www.genome.jp/dbget-bin/www_bget?ko:K14611	B0JZG0	1289	5.27777e-164	Solute carrier family 23 member 2 OS=Xenopus tropicalis GN=slc23a2 PE=2 SV=1	PF00860//PF10541//PF05529	Permease family//Nuclear envelope localisation domain//B-cell receptor-associated protein 31-like	GO:0006886//GO:0006810//GO:0055085	intracellular protein transport//transport//transmembrane transport	GO:0005215//GO:0003779	transporter activity//actin binding	GO:0016021//GO:0016020//GO:0005783	integral component of membrane//membrane//endoplasmic reticulum	KOG1292	Xanthine/uracil transporters
c25261_g1	208	--	--	--	--	--	--	--	--	--	--	--	--	--	--	--	--	--	--	--	--	--	--	--	--	--	--	--	--
c84645_g1	294	--	--	--	--	--	--	--	--	--	--	--	--	--	--	--	--	--	--	--	--	--	--	--	--	--	--	--	--
c4796_g1	345	--	--	--	--	--	--	--	--	--	--	--	--	--	--	--	--	--	--	--	--	--	--	--	--	--	--	--	--
c23985_g1	211	--	--	--	--	--	--	--	--	--	--	--	--	--	--	--	--	--	--	--	--	--	--	--	--	--	--	--	--
c954_g1	251	357627004	EHJ76864.1	405	6.40098e-48	hypothetical protein KGM_08955 [Danaus plexippus]	--	--	--	--	--	K01580	E4.1.1.15, gadB, gadA, GAD	glutamate decarboxylase	http://www.genome.jp/dbget-bin/www_bget?ko:K01580	P20228	366	3.41968e-41	Glutamate decarboxylase OS=Drosophila melanogaster GN=Gad1 PE=2 SV=2	--	--	GO:0019752	carboxylic acid metabolic process	GO:0016831//GO:0030170	carboxy-lyase activity//pyridoxal phosphate binding	--	--	KOG0629	Glutamate decarboxylase and related proteins
c69100_g1	441	--	--	--	--	--	--	--	--	--	--	--	--	--	--	--	--	--	--	--	--	--	--	--	--	--	--	--	--
c1392_g1	490	--	--	--	--	--	--	--	--	--	--	--	--	--	--	--	--	--	--	--	--	--	--	--	--	--	--	--	--
c7400_g1	639	--	--	--	--	--	--	--	--	--	--	--	--	--	--	--	--	--	--	PF12189	Single-strand DNA-binding protein	GO:0009405//GO:0006457	pathogenesis//protein folding	GO:0005515	protein binding	--	--	--	--
c39864_g1	291	--	--	--	--	--	--	--	--	--	--	--	--	--	--	--	--	--	--	--	--	--	--	--	--	--	--	--	--
c22032_g1	211	--	--	--	--	--	--	--	--	--	--	--	--	--	--	--	--	--	--	--	--	--	--	--	--	--	--	--	--
c37983_g1	352	512927307	XP_004931301.1	146	1.79991e-09	PREDICTED: microtubule-associated protein Jupiter-like isoform X2 [Bombyx mori]	--	--	--	--	--	--	--	--	--	--	--	--	--	--	--	--	--	--	--	--	--	--	--
c5173_g1	221	--	--	--	--	--	--	--	--	--	--	--	--	--	--	--	--	--	--	--	--	--	--	--	--	--	--	--	--
c45995_g1	3693	357618194	EHJ71271.1	2168	0	putative tyrosyl-tRNA synthetase, cytoplasmic [Danaus plexippus]	--	--	--	--	--	K01866	YARS, tyrS	tyrosyl-tRNA synthetase	http://www.genome.jp/dbget-bin/www_bget?ko:K01866	Q7ZX51	1893	0	Tyrosine--tRNA ligase, cytoplasmic OS=Xenopus laevis GN=yars PE=2 SV=1	PF02944//PF00579//PF01588	BESS motif//tRNA synthetases class I (W and Y)//Putative tRNA binding domain	GO:0006418//GO:0006437//GO:0000162//GO:0009094//GO:0006571	tRNA aminoacylation for protein translation//tyrosyl-tRNA aminoacylation//tryptophan biosynthetic process//L-phenylalanine biosynthetic process//tyrosine biosynthetic process	GO:0004812//GO:0005524//GO:0000049//GO:0004831//GO:0003677//GO:0000166	aminoacyl-tRNA ligase activity//ATP binding//tRNA binding//tyrosine-tRNA ligase activity//DNA binding//nucleotide binding	GO:0005737	cytoplasm	KOG2144	Tyrosyl-tRNA synthetase, cytoplasmic
c55980_g1	7145	512927623	XP_004931381.1	3159	0	PREDICTED: tight junction protein ZO-1-like [Bombyx mori]	--	--	--	--	--	--	--	--	--	O97758	762	7.66962e-80	Tight junction protein ZO-1 OS=Canis familiaris GN=TJP1 PE=1 SV=1	PF00595//PF13180//PF00625//PF00018	PDZ domain (Also known as DHR or GLGF)//PDZ domain//Guanylate kinase//SH3 domain	--	--	GO:0005515	protein binding	--	--	KOG0708	Membrane-associated guanylate kinase MAGUK (contains PDZ, SH3, HOOK and GUK domains)
c70108_g1	527	--	--	--	--	--	--	--	--	--	--	--	--	--	--	--	--	--	--	--	--	--	--	--	--	--	--	--	--
c78520_g1	376	--	--	--	--	--	--	--	--	--	--	--	--	--	--	--	--	--	--	--	--	--	--	--	--	--	--	--	--
c25310_g1	384	--	--	--	--	--	--	--	--	--	--	--	--	--	--	--	--	--	--	--	--	--	--	--	--	--	--	--	--
c75126_g1	377	--	--	--	--	--	--	--	--	--	--	--	--	--	--	--	--	--	--	--	--	--	--	--	--	--	--	--	--
c16382_g1	363	--	--	--	--	--	--	--	--	--	--	--	--	--	--	--	--	--	--	--	--	--	--	--	--	--	--	--	--
c78721_g1	204	--	--	--	--	--	--	--	--	--	--	--	--	--	--	--	--	--	--	--	--	--	--	--	--	--	--	--	--
c11574_g1	370	--	--	--	--	--	--	--	--	--	--	--	--	--	--	--	--	--	--	--	--	--	--	--	--	--	--	--	--
c51241_g2	1099	646700376	KDR10537.1	235	1.67595e-19	hypothetical protein L798_15246 [Zootermopsis nevadensis]	--	--	--	--	--	--	--	--	--	--	--	--	--	--	--	--	--	--	--	--	--	--	--
c48175_g5	616	357621961	EHJ73599.1	128	8.12633e-06	hypothetical protein KGM_20220 [Danaus plexippus]	--	--	--	--	--	--	--	--	--	--	--	--	--	--	--	--	--	--	--	--	--	--	--
c18949_g1	320	--	--	--	--	--	--	--	--	--	--	--	--	--	--	--	--	--	--	--	--	--	--	--	--	--	--	--	--
c49482_g1	1135	--	--	--	--	--	--	--	--	--	--	--	--	--	--	--	--	--	--	--	--	--	--	--	--	--	--	--	--
c72227_g1	204	--	--	--	--	--	--	--	--	--	--	--	--	--	--	--	--	--	--	--	--	--	--	--	--	--	--	--	--
c48891_g5	575	--	--	--	--	--	--	--	--	--	--	--	--	--	--	--	--	--	--	--	--	--	--	--	--	--	--	--	--
c75810_g1	336	--	--	--	--	--	--	--	--	--	--	--	--	--	--	--	--	--	--	--	--	--	--	--	--	--	--	--	--
c42584_g1	534	--	--	--	--	--	--	--	--	--	--	--	--	--	--	--	--	--	--	--	--	--	--	--	--	--	--	--	--
c87191_g1	239	169766380	XP_001817661.1	409	1.74362e-45	ATP synthase subunit alpha [Aspergillus oryzae RIB40] >gi|238483087|ref|XP_002372782.1| mitochondrial F1 ATPase subunit alpha, putative [Aspergillus flavus NRRL3357] >gi|83765516|dbj|BAE55659.1| unnamed protein product [Aspergillus oryzae RIB40] >gi|220700832|gb|EED57170.1| mitochondrial F1 ATPase subunit alpha, putative [Aspergillus flavus NRRL3357] >gi|391864757|gb|EIT74051.1| F0F1-type ATP syn…	317139642	XM_001817609.2	233	2.29475e-117	Aspergillus oryzae RIB40 ATP synthase subunit alpha, mRNA	K02132	ATPeF1A, ATP5A1, ATP1	F-type H+-transporting ATPase subunit alpha	http://www.genome.jp/dbget-bin/www_bget?ko:K02132	P37211	388	4.50143e-44	ATP synthase subunit alpha, mitochondrial OS=Neurospora crassa (strain ATCC 24698 / 74-OR23-1A / CBS 708.71 / DSM 1257 / FGSC 987) GN=atp-1 PE=3 SV=1	PF02874	ATP synthase alpha/beta family, beta-barrel domain	GO:0015992//GO:0006119//GO:0046034//GO:0006200//GO:0015986//GO:0015991	proton transport//oxidative phosphorylation//ATP metabolic process//ATP catabolic process//ATP synthesis coupled proton transport//ATP hydrolysis coupled proton transport	GO:0046933//GO:0046961//GO:0005524	proton-transporting ATP synthase activity, rotational mechanism//proton-transporting ATPase activity, rotational mechanism//ATP binding	GO:0042645//GO:0005754//GO:0045259	mitochondrial nucleoid//mitochondrial proton-transporting ATP synthase, catalytic core//proton-transporting ATP synthase complex	KOG1353	F0F1-type ATP synthase, alpha subunit
c85431_g1	289	284431720	ADB84599.1	269	2.53807e-26	nicotinic acetylcholine receptor alpha 6 isoform XVII [Plutella xylostella]	4895006	AF143847.1	191	6.31717e-94	Heliothis virescens putative nicotinic acetylcholine receptor alpha 7-2 subunit mRNA, complete cds	K05312	CHRNN	nicotinic acetylcholine receptor, invertebrate	http://www.genome.jp/dbget-bin/www_bget?ko:K05312	Q05941	163	7.3874e-13	Neuronal acetylcholine receptor subunit alpha-7 OS=Rattus norvegicus GN=Chrna7 PE=1 SV=2	PF02931	Neurotransmitter-gated ion-channel ligand binding domain	GO:0006811//GO:0007165//GO:0006812//GO:0006810	ion transport//signal transduction//cation transport//transport	GO:0004889//GO:0005230	acetylcholine-activated cation-selective channel activity//extracellular ligand-gated ion channel activity	GO:0045211//GO:0030054//GO:0005886//GO:0016020//GO:0016021	postsynaptic membrane//cell junction//plasma membrane//membrane//integral component of membrane	KOG3646	Acetylcholine receptor
c48764_g1	2009	512924465	XP_004930602.1	1131	1.96465e-147	PREDICTED: protein YIPF5-like [Bombyx mori]	389611622	AK402821.1	280	1.63115e-142	Papilio xuthus mRNA for integral membrane protein, Tmp21-I, complete cds, sequence id: Px-0491, expressed in epidermis	K14825	ERP2	protein ERP2	http://www.genome.jp/dbget-bin/www_bget?ko:K14825	D3ZTX0	497	4.0413e-56	Transmembrane emp24 domain-containing protein 7 OS=Rattus norvegicus GN=Tmed7 PE=1 SV=1	PF08148//PF01105//PF04893	DSHCT (NUC185) domain//emp24/gp25L/p24 family/GOLD//Yip1 domain	GO:0006810	transport	GO:0005524//GO:0016818	ATP binding//hydrolase activity, acting on acid anhydrides, in phosphorus-containing anhydrides	GO:0016021//GO:0016020	integral component of membrane//membrane	KOG1693	emp24/gp25L/p24 family of membrane trafficking proteins
c57823_g1	451	--	--	--	--	--	--	--	--	--	--	--	--	--	--	--	--	--	--	--	--	--	--	--	--	--	--	--	--
c74629_g1	222	--	--	--	--	--	--	--	--	--	--	--	--	--	--	--	--	--	--	--	--	--	--	--	--	--	--	--	--
c32681_g1	442	--	--	--	--	--	--	--	--	--	--	--	--	--	--	--	--	--	--	--	--	--	--	--	--	--	--	--	--
c7959_g1	469	--	--	--	--	--	--	--	--	--	--	--	--	--	--	--	--	--	--	--	--	--	--	--	--	--	--	--	--
c85640_g1	480	--	--	--	--	--	--	--	--	--	--	--	--	--	--	--	--	--	--	--	--	--	--	--	--	--	--	--	--
c17085_g1	206	--	--	--	--	--	--	--	--	--	--	--	--	--	--	--	--	--	--	--	--	--	--	--	--	--	--	--	--
c57759_g1	453	--	--	--	--	--	--	--	--	--	--	--	--	--	--	--	--	--	--	--	--	--	--	--	--	--	--	--	--
c10243_g1	220	--	--	--	--	--	--	--	--	--	--	--	--	--	--	--	--	--	--	--	--	--	--	--	--	--	--	--	--
c55112_g1	5314	512901625	XP_004925181.1	6460	0	PREDICTED: LOW QUALITY PROTEIN: DNA-directed RNA polymerase I subunit RPA1-like [Bombyx mori]	383860777	XM_003705818.1	141	8.11218e-65	PREDICTED: Megachile rotundata DNA-directed RNA polymerase I subunit RPA1-like (LOC100877067), mRNA	K02999	RPA1, POLR1A	DNA-directed RNA polymerase I subunit RPA1	http://www.genome.jp/dbget-bin/www_bget?ko:K02999	O95602	3341	0	DNA-directed RNA polymerase I subunit RPA1 OS=Homo sapiens GN=POLR1A PE=1 SV=2	PF05365//PF00623//PF04997//PF04983//PF05000//PF04147//PF04998	Ubiquinol-cytochrome C reductase, UQCRX/QCR9 like//RNA polymerase Rpb1, domain 2//RNA polymerase Rpb1, domain 1//RNA polymerase Rpb1, domain 3//RNA polymerase Rpb1, domain 4//Nop14-like family//RNA polymerase Rpb1, domain 5	GO:0006144//GO:0006206//GO:0006122//GO:0006351	purine nucleobase metabolic process//pyrimidine nucleobase metabolic process//mitochondrial electron transport, ubiquinol to cytochrome c//transcription, DNA-templated	GO:0003677//GO:0003899	DNA binding//DNA-directed RNA polymerase activity	GO:0005730//GO:0032040//GO:0005740//GO:0005750	nucleolus//small-subunit processome//mitochondrial envelope//mitochondrial respiratory chain complex III	KOG0262	RNA polymerase I, large subunit
c7278_g1	295	--	--	--	--	--	--	--	--	--	--	--	--	--	--	--	--	--	--	--	--	--	--	--	--	--	--	--	--
c88793_g1	205	--	--	--	--	--	--	--	--	--	--	--	--	--	--	--	--	--	--	--	--	--	--	--	--	--	--	--	--
c34976_g1	321	--	--	--	--	--	--	--	--	--	--	--	--	--	--	--	--	--	--	--	--	--	--	--	--	--	--	--	--
c56808_g1	257	--	--	--	--	--	--	--	--	--	--	--	--	--	--	--	--	--	--	--	--	--	--	--	--	--	--	--	--
c61148_g1	205	--	--	--	--	--	--	--	--	--	--	--	--	--	--	--	--	--	--	--	--	--	--	--	--	--	--	--	--
c59621_g1	224	--	--	--	--	--	--	--	--	--	--	--	--	--	--	--	--	--	--	--	--	--	--	--	--	--	--	--	--
c24572_g1	302	--	--	--	--	--	--	--	--	--	--	--	--	--	--	--	--	--	--	--	--	--	--	--	--	--	--	--	--
c29978_g1	516	--	--	--	--	--	--	--	--	--	--	--	--	--	--	--	--	--	--	--	--	--	--	--	--	--	--	--	--
c44753_g1	1468	--	--	--	--	--	--	--	--	--	--	--	--	--	--	--	--	--	--	--	--	--	--	--	--	--	--	--	--
c51992_g1	2297	--	--	--	--	--	--	--	--	--	--	--	--	--	--	--	--	--	--	--	--	--	--	--	--	--	--	--	--
c46504_g1	7063	357628809	EHJ77984.1	4373	0	hypothetical protein KGM_17376 [Danaus plexippus]	--	--	--	--	--	--	--	--	--	Q5EA33	345	1.17573e-33	Ankyrin repeat domain-containing protein 49 OS=Bos taurus GN=ANKRD49 PE=2 SV=1	PF13606//PF00023	Ankyrin repeat//Ankyrin repeat	--	--	GO:0005515	protein binding	--	--	KOG4177	Ankyrin
c67120_g1	209	--	--	--	--	--	--	--	--	--	--	--	--	--	--	--	--	--	--	--	--	--	--	--	--	--	--	--	--
c24946_g1	696	--	--	--	--	--	--	--	--	--	--	--	--	--	--	--	--	--	--	--	--	--	--	--	--	--	--	--	--
c66573_g1	226	--	--	--	--	--	558607752	AP013036.1	219	1.30354e-109	Enterococcus mundtii QU 25 DNA, complete genome	--	--	--	--	--	--	--	--	--	--	--	--	--	--	--	--	--	--
c2173_g1	249	--	--	--	--	--	--	--	--	--	--	--	--	--	--	--	--	--	--	--	--	--	--	--	--	--	--	--	--
c26053_g1	236	--	--	--	--	--	--	--	--	--	--	--	--	--	--	--	--	--	--	--	--	--	--	--	--	--	--	--	--
c42979_g1	799	389615367	BAM20660.1	201	9.28223e-17	unknown unsecreted protein [Papilio polytes]	--	--	--	--	--	--	--	--	--	--	--	--	--	--	--	--	--	--	--	--	--	--	--
c29250_g1	592	--	--	--	--	--	--	--	--	--	--	--	--	--	--	--	--	--	--	--	--	--	--	--	--	--	--	--	--
c47617_g1	1988	--	--	--	--	--	--	--	--	--	--	--	--	--	--	--	--	--	--	--	--	--	--	--	--	--	--	--	--
c11958_g1	394	--	--	--	--	--	--	--	--	--	--	--	--	--	--	--	--	--	--	--	--	--	--	--	--	--	--	--	--
c36217_g1	270	--	--	--	--	--	--	--	--	--	--	--	--	--	--	--	--	--	--	--	--	--	--	--	--	--	--	--	--
c43618_g1	1081	512888483	XP_004922094.1	191	3.4896e-14	PREDICTED: uncharacterized protein LOC101740481 [Bombyx mori]	--	--	--	--	--	--	--	--	--	--	--	--	--	PF01284	Membrane-associating domain	--	--	--	--	GO:0016020	membrane	--	--
c46244_g2	2724	357620331	EHJ72561.1	2312	0	hypothetical protein KGM_14742 [Danaus plexippus]	148226560	NM_001091977.1	47	7.42549e-13	Xenopus laevis coiled-coil domain containing 93 (ccdc93), mRNA >gnl|BL_ORD_ID|2848310 Xenopus laevis MGC79132 protein, mRNA (cDNA clone MGC:79132 IMAGE:5072992), complete cds	--	--	--	--	Q6GQI5	888	1.34419e-105	Coiled-coil domain-containing protein 93 OS=Xenopus laevis GN=ccdc93 PE=2 SV=1	PF15337//PF04632//PF09172	Vascular protein family Vasculin-like 1//Fusaric acid resistance protein family//Domain of unknown function (DUF1943)	GO:0006869//GO:0006351//GO:0045893//GO:0006810	lipid transport//transcription, DNA-templated//positive regulation of transcription, DNA-templated//transport	GO:0005319//GO:0003700	lipid transporter activity//sequence-specific DNA binding transcription factor activity	GO:0005886//GO:0005634//GO:0005667	plasma membrane//nucleus//transcription factor complex	KOG2701	Uncharacterized conserved protein
c9236_g1	413	--	--	--	--	--	--	--	--	--	--	--	--	--	--	--	--	--	--	--	--	--	--	--	--	--	--	--	--
c85778_g1	291	--	--	--	--	--	--	--	--	--	--	--	--	--	--	--	--	--	--	--	--	--	--	--	--	--	--	--	--
c56142_g1	1759	112982792	NP_001036897.1	461	1.38995e-49	Y-box protein [Bombyx mori] >gi|49532669|dbj|BAD26606.1| Y-box protein [Bombyx mori]	346705046	AK383623.1	365	0	Bombyx mori mRNA, clone: MFB-14K18	K09276	YBX1, NSEP1	Y-box-binding protein 1	http://www.genome.jp/dbget-bin/www_bget?ko:K09276	P67809	377	7.98954e-39	Nuclease-sensitive element-binding protein 1 OS=Homo sapiens GN=YBX1 PE=1 SV=3	PF00313	'Cold-shock' DNA-binding domain	GO:0006355	regulation of transcription, DNA-templated	GO:0003677	DNA binding	--	--	KOG3070	Predicted RNA-binding protein containing PIN domain and invovled in translation or RNA processing
c21766_g1	349	--	--	--	--	--	--	--	--	--	--	--	--	--	--	--	--	--	--	--	--	--	--	--	--	--	--	--	--
c22301_g1	270	--	--	--	--	--	--	--	--	--	--	--	--	--	--	--	--	--	--	--	--	--	--	--	--	--	--	--	--
c13476_g1	473	--	--	--	--	--	--	--	--	--	--	--	--	--	--	--	--	--	--	--	--	--	--	--	--	--	--	--	--
c62706_g1	345	478255078	ENN75308.1	139	7.46952e-08	hypothetical protein YQE_08085, partial [Dendroctonus ponderosae]	--	--	--	--	--	--	--	--	--	--	--	--	--	--	--	--	--	--	--	--	--	--	--
c65051_g1	237	--	--	--	--	--	--	--	--	--	--	--	--	--	--	--	--	--	--	--	--	--	--	--	--	--	--	--	--
c86485_g1	203	--	--	--	--	--	--	--	--	--	--	--	--	--	--	--	--	--	--	--	--	--	--	--	--	--	--	--	--
c59526_g1	237	--	--	--	--	--	--	--	--	--	--	--	--	--	--	--	--	--	--	--	--	--	--	--	--	--	--	--	--
c29372_g1	1237	512900415	XP_004924886.1	1314	1.13416e-166	PREDICTED: guanylate cyclase 32E-like [Bombyx mori]	640802381	XM_008059320.1	96	1.91692e-40	PREDICTED: Tarsius syrichta atrial natriuretic peptide receptor 1 (LOC103261740), transcript variant X2, mRNA	K12323	ANPRA, NPR1	atrial natriuretic peptide receptor A	http://www.genome.jp/dbget-bin/www_bget?ko:K12323	P16066	672	5.11989e-77	Atrial natriuretic peptide receptor 1 OS=Homo sapiens GN=NPR1 PE=1 SV=1	PF00211	Adenylate and Guanylate cyclase catalytic domain	GO:0009190//GO:0035556	cyclic nucleotide biosynthetic process//intracellular signal transduction	GO:0016849	phosphorus-oxygen lyase activity	--	--	KOG1023	Natriuretic peptide receptor, guanylate cyclase
c28958_g1	621	--	--	--	--	--	--	--	--	--	--	--	--	--	--	--	--	--	--	--	--	--	--	--	--	--	--	--	--
c23115_g1	518	--	--	--	--	--	--	--	--	--	--	--	--	--	--	--	--	--	--	--	--	--	--	--	--	--	--	--	--
c83535_g1	213	--	--	--	--	--	--	--	--	--	--	--	--	--	--	--	--	--	--	--	--	--	--	--	--	--	--	--	--
c57619_g1	230	--	--	--	--	--	--	--	--	--	--	--	--	--	--	--	--	--	--	--	--	--	--	--	--	--	--	--	--
c49029_g1	763	--	--	--	--	--	--	--	--	--	--	--	--	--	--	--	--	--	--	--	--	--	--	--	--	--	--	--	--
c37317_g1	862	669323107	KFD63371.1	194	1.00477e-13	hypothetical protein M514_24458 [Trichuris suis]	--	--	--	--	--	--	--	--	--	P10978	132	2.70684e-07	Retrovirus-related Pol polyprotein from transposon TNT 1-94 OS=Nicotiana tabacum PE=2 SV=1	PF00098	Zinc knuckle	--	--	GO:0003676//GO:0008270	nucleic acid binding//zinc ion binding	--	--	--	--
c45607_g1	550	--	--	--	--	--	--	--	--	--	--	--	--	--	--	--	--	--	--	--	--	--	--	--	--	--	--	--	--
c19536_g1	322	--	--	--	--	--	--	--	--	--	--	--	--	--	--	--	--	--	--	--	--	--	--	--	--	--	--	--	--
c79354_g1	216	357629404	EHJ78192.1	280	2.57665e-28	hypothetical protein KGM_04116 [Danaus plexippus]	--	--	--	--	--	K14076	PNLIPRP3, PLRP3	pancreatic lipase-related protein 3	http://www.genome.jp/dbget-bin/www_bget?ko:K14076	Q17RR3	203	9.80696e-19	Pancreatic lipase-related protein 3 OS=Homo sapiens GN=PNLIPRP3 PE=2 SV=2	PF01764	Lipase (class 3)	GO:0046486//GO:0016042//GO:0006629	glycerolipid metabolic process//lipid catabolic process//lipid metabolic process	GO:0004806//GO:0016787	triglyceride lipase activity//hydrolase activity	GO:0005576	extracellular region	--	--
c46326_g1	1466	512906628	XP_004926244.1	1273	1.31519e-170	PREDICTED: arrestin domain-containing protein 5-like isoform X1 [Bombyx mori]	512906627	XM_004926187.1	355	0	PREDICTED: Bombyx mori arrestin domain-containing protein 5-like (LOC101740093), transcript variant X1, mRNA	--	--	--	--	Q8TBH0	236	5.66597e-20	Arrestin domain-containing protein 2 OS=Homo sapiens GN=ARRDC2 PE=2 SV=2	PF01835	MG2 domain	--	--	GO:0004866	endopeptidase inhibitor activity	--	--	KOG3780	Thioredoxin binding protein TBP-2/VDUP1
c19822_g1	437	357615241	EHJ69546.1	156	1.07724e-09	hypothetical protein KGM_05403 [Danaus plexippus]	--	--	--	--	--	--	--	--	--	--	--	--	--	PF01833	IPT/TIG domain	--	--	GO:0005515	protein binding	--	--	--	--
c17369_g1	298	--	--	--	--	--	--	--	--	--	--	--	--	--	--	--	--	--	--	--	--	--	--	--	--	--	--	--	--
c25218_g1	799	--	--	--	--	--	--	--	--	--	--	--	--	--	--	--	--	--	--	PF00647//PF00558	Elongation factor 1 gamma, conserved domain//Vpu protein	GO:0006448//GO:0006414//GO:0019076//GO:0006812//GO:0032801	regulation of translational elongation//translational elongation//viral release from host cell//cation transport//receptor catabolic process	GO:0003746//GO:0005261	translation elongation factor activity//cation channel activity	GO:0005840//GO:0005853//GO:0033644	ribosome//eukaryotic translation elongation factor 1 complex//host cell membrane	--	--
c25556_g1	304	--	--	--	--	--	--	--	--	--	--	--	--	--	--	--	--	--	--	--	--	--	--	--	--	--	--	--	--
c75618_g1	217	--	--	--	--	--	--	--	--	--	--	--	--	--	--	--	--	--	--	--	--	--	--	--	--	--	--	--	--
c52717_g2	730	--	--	--	--	--	--	--	--	--	--	--	--	--	--	--	--	--	--	--	--	--	--	--	--	--	--	--	--
c44547_g2	296	324096404	ADY17731.1	132	3.6793e-07	AT12761p [Drosophila melanogaster]	--	--	--	--	--	--	--	--	--	--	--	--	--	--	--	--	--	--	--	--	--	--	--
c43589_g1	490	--	--	--	--	--	--	--	--	--	--	--	--	--	--	--	--	--	--	--	--	--	--	--	--	--	--	--	--
c74115_g1	206	--	--	--	--	--	--	--	--	--	--	--	--	--	--	--	--	--	--	--	--	--	--	--	--	--	--	--	--
c18383_g1	293	--	--	--	--	--	--	--	--	--	--	--	--	--	--	--	--	--	--	--	--	--	--	--	--	--	--	--	--
c53350_g1	2137	--	--	--	--	--	389611739	AK402890.1	66	1.5912e-23	Papilio xuthus mRNA, DEAD box ATP-dependent RNA helicase, sequence id: Px-0676, expressed in epidermis	--	--	--	--	--	--	--	--	--	--	--	--	--	--	--	--	--	--
c47874_g1	899	512918330	XP_004929107.1	832	1.29723e-100	PREDICTED: LIM domain kinase 1-like [Bombyx mori]	--	--	--	--	--	K05743	LIMK1	LIM domain kinase 1	http://www.genome.jp/dbget-bin/www_bget?ko:K05743	Q8IR79	514	1.52299e-56	LIM domain kinase 1 OS=Drosophila melanogaster GN=LIMK1 PE=1 SV=1	PF13180//PF00412//PF00595//PF00739	PDZ domain//LIM domain//PDZ domain (Also known as DHR or GLGF)//Trans-activation protein X	GO:0019079	viral genome replication	GO:0005515//GO:0008270	protein binding//zinc ion binding	--	--	KOG1044	Actin-binding LIM Zn-finger protein Limatin involved in axon guidance
c50362_g1	4752	4239843	BAA74713.1	2643	0	Yokozuna [Bombyx mori]	--	--	--	--	--	--	--	--	--	P10978	1522	0	Retrovirus-related Pol polyprotein from transposon TNT 1-94 OS=Nicotiana tabacum PE=2 SV=1	PF00098//PF01580//PF00665	Zinc knuckle//FtsK/SpoIIIE family//Integrase core domain	GO:0015074//GO:0051301//GO:0007049//GO:0007059	DNA integration//cell division//cell cycle//chromosome segregation	GO:0005524//GO:0003676//GO:0003677//GO:0008270//GO:0000166	ATP binding//nucleic acid binding//DNA binding//zinc ion binding//nucleotide binding	GO:0016021	integral component of membrane	KOG0017	FOG: Transposon-encoded proteins with TYA, reverse transcriptase, integrase domains in various combinations
c78846_g1	277	--	--	--	--	--	--	--	--	--	--	--	--	--	--	--	--	--	--	--	--	--	--	--	--	--	--	--	--
c51945_g1	1800	357630152	EHJ78476.1	901	3.2776e-113	hypothetical protein KGM_14476 [Danaus plexippus]	--	--	--	--	--	K15630	VTC2	GDP-D-glucose phosphorylase	http://www.genome.jp/dbget-bin/www_bget?ko:K15630	Q08CA1	494	1.13264e-54	GDP-D-glucose phosphorylase 1 OS=Danio rerio GN=gdpgp1 PE=2 SV=1	--	--	--	--	--	--	--	--	KOG2720	Predicted hydrolase (HIT family)
c50020_g2	713	--	--	--	--	--	--	--	--	--	--	--	--	--	--	--	--	--	--	--	--	--	--	--	--	--	--	--	--
c9676_g1	218	--	--	--	--	--	--	--	--	--	--	--	--	--	--	--	--	--	--	--	--	--	--	--	--	--	--	--	--
c27014_g1	1022	512909591	XP_004926959.1	301	1.28737e-35	PREDICTED: prostasin-like [Bombyx mori]	--	--	--	--	--	--	--	--	--	P51588	192	1.35184e-15	Trypsin OS=Sarcophaga bullata PE=1 SV=1	PF00089	Trypsin	GO:0006508	proteolysis	GO:0004252	serine-type endopeptidase activity	--	--	--	--
c77175_g1	209	--	--	--	--	--	--	--	--	--	--	--	--	--	--	--	--	--	--	--	--	--	--	--	--	--	--	--	--
c299_g1	773	20139580	Q962S7.3	416	3.50073e-48	RecName: Full=60S ribosomal protein L37 [Spodoptera frugiperda] >gi|15213792|gb|AAK92171.1|AF400199_1 ribosomal protein L37 [Spodoptera frugiperda] >gi|268306356|gb|ACY95299.1| ribosomal protein L37 [Manduca sexta] >gi|342356399|gb|AEL28858.1| ribosomal protein L37 [Heliconius melpomene cythera] >gi|389608491|dbj|BAM17855.1| ribosomal protein L37a [Papilio xuthus] >gi|389610905|dbj|BAM19063.1| ri…	389608490	AK401233.1	211	1.38942e-104	Papilio xuthus mRNA for ribosomal protein L37a, complete cds, sequence id: Px-0263	K02922	RP-L37e, RPL37	large subunit ribosomal protein L37e	http://www.genome.jp/dbget-bin/www_bget?ko:K02922	Q962S7	416	1.04873e-49	60S ribosomal protein L37 OS=Spodoptera frugiperda GN=RpL37 PE=3 SV=3	PF01907//PF00097	Ribosomal protein L37e//Zinc finger, C3HC4 type (RING finger)	GO:0042254//GO:0006412	ribosome biogenesis//translation	GO:0019843//GO:0046872//GO:0003735	rRNA binding//metal ion binding//structural constituent of ribosome	GO:0005840//GO:0005622	ribosome//intracellular	KOG3475	60S ribosomal protein L37
c51913_g1	4105	31978945	AAO41697.1	1032	5.52574e-125	transcription factor E74 isoform B [Manduca sexta]	536191362	AB848928.1	560	0	Bombyx mori E74B mRNA for transcription factor, complete cds	K09428	ELF1_2_4	E74-like factor 1/2/4	http://www.genome.jp/dbget-bin/www_bget?ko:K09428	P11536	577	9.85663e-60	Ecdysone-induced protein 74EF isoform B OS=Drosophila melanogaster GN=Eip74EF PE=2 SV=2	PF00178//PF00839	Ets-domain//Cysteine rich repeat	GO:0006355	regulation of transcription, DNA-templated	GO:0043565//GO:0003700	sequence-specific DNA binding//sequence-specific DNA binding transcription factor activity	GO:0005634//GO:0016020//GO:0005667	nucleus//membrane//transcription factor complex	KOG3804	Transcription factor NERF and related proteins, contain ETS domain
c14056_g1	230	--	--	--	--	--	--	--	--	--	--	--	--	--	--	--	--	--	--	--	--	--	--	--	--	--	--	--	--
c52856_g1	897	357618850	EHJ71664.1	258	1.07495e-24	hypothetical protein KGM_00544 [Danaus plexippus]	--	--	--	--	--	--	--	--	--	--	--	--	--	--	--	--	--	--	--	--	--	--	--
c32261_g1	220	--	--	--	--	--	--	--	--	--	--	--	--	--	--	--	--	--	--	--	--	--	--	--	--	--	--	--	--
c44463_g1	893	389610831	BAM19026.1	825	1.45602e-107	nascent polypeptide associated complex protein alpha subunit [Papilio polytes]	195170351	XM_002025941.1	105	1.35912e-45	Drosophila persimilis GL10112 (Dper\GL10112), mRNA	K03626	EGD2, NACA	nascent polypeptide-associated complex subunit alpha	http://www.genome.jp/dbget-bin/www_bget?ko:K03626	Q94518	542	2.4752e-66	Nascent polypeptide-associated complex subunit alpha OS=Drosophila melanogaster GN=Nacalpha PE=1 SV=2	PF00416//PF00627	Ribosomal protein S13/S18//UBA/TS-N domain	GO:0006412//GO:0042254	translation//ribosome biogenesis	GO:0005515//GO:0003723//GO:0003735	protein binding//RNA binding//structural constituent of ribosome	GO:0005840//GO:0005622	ribosome//intracellular	KOG2239	Transcription factor containing NAC and TS-N domains
c51257_g3	2446	512907944	XP_004926568.1	2387	0	PREDICTED: leucine-rich repeat-containing protein 40-like [Bombyx mori]	--	--	--	--	--	--	--	--	--	Q5ZLN0	935	1.85206e-113	Leucine-rich repeat-containing protein 40 OS=Gallus gallus GN=LRRC40 PE=2 SV=1	PF00560	Leucine Rich Repeat	--	--	GO:0005515	protein binding	--	--	KOG0472	Leucine-rich repeat protein
c67086_g1	276	--	--	--	--	--	--	--	--	--	--	--	--	--	--	--	--	--	--	--	--	--	--	--	--	--	--	--	--
c52615_g1	5910	357619559	EHJ72085.1	5519	0	THO complex subunit 2 [Danaus plexippus]	346713557	AK386443.1	836	0	Bombyx mori mRNA, clone: fprW07O21	K12879	THOC2	THO complex subunit 2	http://www.genome.jp/dbget-bin/www_bget?ko:K12879	B1AZI6	2541	0	THO complex subunit 2 OS=Mus musculus GN=Thoc2 PE=1 SV=1	PF01441	Lipoprotein	GO:0006952	defense response	--	--	GO:0009279	cell outer membrane	KOG1874	KEKE-like motif-containing transcription regulator (Rlr1)/suppressor of sin4
c18217_g1	208	--	--	--	--	--	--	--	--	--	--	--	--	--	--	--	--	--	--	--	--	--	--	--	--	--	--	--	--
c82295_g1	205	--	--	--	--	--	--	--	--	--	--	--	--	--	--	--	--	--	--	--	--	--	--	--	--	--	--	--	--
c76195_g1	381	546680801	ERL91007.1	150	2.29809e-09	hypothetical protein D910_08349 [Dendroctonus ponderosae]	--	--	--	--	--	--	--	--	--	--	--	--	--	--	--	--	--	--	--	--	--	--	--
c777_g1	301	--	--	--	--	--	--	--	--	--	--	--	--	--	--	--	--	--	--	--	--	--	--	--	--	--	--	--	--
c65774_g1	204	--	--	--	--	--	--	--	--	--	--	--	--	--	--	--	--	--	--	--	--	--	--	--	--	--	--	--	--
c58634_g1	305	--	--	--	--	--	--	--	--	--	--	--	--	--	--	--	--	--	--	--	--	--	--	--	--	--	--	--	--
c55437_g1	3078	--	--	--	--	--	--	--	--	--	--	--	--	--	--	--	--	--	--	--	--	--	--	--	--	--	--	--	--
c73109_g1	250	--	--	--	--	--	--	--	--	--	--	--	--	--	--	--	--	--	--	--	--	--	--	--	--	--	--	--	--
c40518_g1	1148	389608557	BAM17888.1	469	1.6324e-53	unknown secreted protein [Papilio xuthus]	--	--	--	--	--	--	--	--	--	--	--	--	--	--	--	--	--	--	--	--	--	--	--
c67798_g1	213	--	--	--	--	--	--	--	--	--	--	--	--	--	--	--	--	--	--	--	--	--	--	--	--	--	--	--	--
c85339_g1	305	--	--	--	--	--	--	--	--	--	--	--	--	--	--	--	--	--	--	--	--	--	--	--	--	--	--	--	--
c48421_g2	207	--	--	--	--	--	--	--	--	--	--	--	--	--	--	--	--	--	--	--	--	--	--	--	--	--	--	--	--
c50682_g2	2442	512913741	XP_004927968.1	1673	0	PREDICTED: cytochrome P450 CYP12A2-like isoform X1 [Bombyx mori] >gi|433339062|dbj|BAM73885.1| cytochrome P450 [Bombyx mori] >gi|433339071|dbj|BAM73888.1| cytochrome P450 [Bombyx mori]	85813218	DQ354706.1	192	1.65027e-93	Ostrinia nubilalis clone D282 microsatellite sequence	K15004	CYP12	cytochrome P450, family 12	http://www.genome.jp/dbget-bin/www_bget?ko:K15004	O18635	907	4.46674e-110	Cytochrome P450 CYP12A2 OS=Musca domestica GN=CYP12A2 PE=2 SV=1	PF00067//PF02226	Cytochrome P450//Picornavirus coat protein (VP4)	GO:0055114	oxidation-reduction process	GO:0005198//GO:0020037//GO:0016705//GO:0005506	structural molecule activity//heme binding//oxidoreductase activity, acting on paired donors, with incorporation or reduction of molecular oxygen//iron ion binding	GO:0019028	viral capsid	KOG0159	Cytochrome P450 CYP11/CYP12/CYP24/CYP27 subfamilies
c37689_g2	834	--	--	--	--	--	--	--	--	--	--	--	--	--	--	--	--	--	--	--	--	--	--	--	--	--	--	--	--
c18505_g1	415	--	--	--	--	--	--	--	--	--	--	--	--	--	--	--	--	--	--	--	--	--	--	--	--	--	--	--	--
c2764_g1	452	--	--	--	--	--	--	--	--	--	--	--	--	--	--	--	--	--	--	--	--	--	--	--	--	--	--	--	--
c74832_g1	279	--	--	--	--	--	--	--	--	--	--	--	--	--	--	--	--	--	--	--	--	--	--	--	--	--	--	--	--
c58419_g1	236	--	--	--	--	--	--	--	--	--	--	--	--	--	--	--	--	--	--	--	--	--	--	--	--	--	--	--	--
c46538_g2	3544	512928734	XP_004931651.1	2164	0	PREDICTED: potassium voltage-gated channel protein Shab-like, partial [Bombyx mori]	512928733	XM_004931594.1	735	0	PREDICTED: Bombyx mori potassium voltage-gated channel protein Shab-like (LOC101738948), partial mRNA	K04886	KCNB2	potassium voltage-gated channel Shab-related subfamily B member 2	http://www.genome.jp/dbget-bin/www_bget?ko:K04886	P17970	1973	0	Potassium voltage-gated channel protein Shab OS=Drosophila melanogaster GN=Shab PE=1 SV=2	PF02214//PF00520	BTB/POZ domain//Ion transport protein	GO:0006811//GO:0051260//GO:0055085	ion transport//protein homooligomerization//transmembrane transport	GO:0005216	ion channel activity	GO:0016020	membrane	KOG3713	Voltage-gated K+ channel KCNB/KCNC
c74136_g1	276	84801		150	1.92745e-09	hypothetical protein 2 - silkworm transposon mag	--	--	--	--	--	--	--	--	--	--	--	--	--	PF07284	2-vinyl bacteriochlorophyllide hydratase (BCHF)	GO:0030494//GO:0019685	bacteriochlorophyll biosynthetic process//photosynthesis, dark reaction	GO:0016836	hydro-lyase activity	--	--	--	--
c77253_g1	296	--	--	--	--	--	--	--	--	--	--	--	--	--	--	--	--	--	--	--	--	--	--	--	--	--	--	--	--
c24966_g1	655	--	--	--	--	--	--	--	--	--	--	--	--	--	--	--	--	--	--	--	--	--	--	--	--	--	--	--	--
c66595_g1	300	--	--	--	--	--	--	--	--	--	--	--	--	--	--	--	--	--	--	--	--	--	--	--	--	--	--	--	--
c10239_g1	301	--	--	--	--	--	--	--	--	--	--	--	--	--	--	--	--	--	--	--	--	--	--	--	--	--	--	--	--
c55613_g2	4709	512907697	XP_004926507.1	3293	0	PREDICTED: dynactin subunit 1-like [Bombyx mori]	--	--	--	--	--	K04648	DCTN1	dynactin 1	http://www.genome.jp/dbget-bin/www_bget?ko:K04648	P13496	1457	1.88189e-174	Dynactin subunit 1 OS=Drosophila melanogaster GN=Gl PE=1 SV=2	--	--	--	--	--	--	--	--	KOG4568	Cytoskeleton-associated protein and related proteins
c51085_g2	902	512915277	XP_004928350.1	450	1.77582e-50	PREDICTED: uncharacterized protein LOC101735923 isoform X1 [Bombyx mori] >gi|512915281|ref|XP_004928351.1| PREDICTED: uncharacterized protein LOC101735923 isoform X2 [Bombyx mori]	--	--	--	--	--	--	--	--	--	--	--	--	--	--	--	--	--	--	--	--	--	--	--
c67381_g1	225	--	--	--	--	--	--	--	--	--	--	--	--	--	--	--	--	--	--	--	--	--	--	--	--	--	--	--	--
c54931_g1	5308	512929618	XP_004931866.1	4689	0	PREDICTED: dual 3',5'-cyclic-AMP and -GMP phosphodiesterase 11-like [Bombyx mori]	512929617	XM_004931809.1	1291	0	PREDICTED: Bombyx mori dual 3',5'-cyclic-AMP and -GMP phosphodiesterase 11-like (LOC101738997), mRNA	K13298	PDE11	dual 3',5'-cyclic-AMP and -GMP phosphodiesterase 11	http://www.genome.jp/dbget-bin/www_bget?ko:K13298	Q9VJ79	3037	0	Dual 3',5'-cyclic-AMP and -GMP phosphodiesterase 11 OS=Drosophila melanogaster GN=Pde11 PE=1 SV=4	PF01966//PF13492//PF01590//PF13185//PF00233	HD domain//GAF domain//GAF domain//GAF domain//3'5'-cyclic nucleotide phosphodiesterase	GO:0006144//GO:0007165	purine nucleobase metabolic process//signal transduction	GO:0008081//GO:0005515//GO:0004114//GO:0046872	phosphoric diester hydrolase activity//protein binding//3',5'-cyclic-nucleotide phosphodiesterase activity//metal ion binding	--	--	KOG3689	Cyclic nucleotide phosphodiesterase
c87196_g1	220	--	--	--	--	--	--	--	--	--	--	--	--	--	--	--	--	--	--	--	--	--	--	--	--	--	--	--	--
c28253_g1	247	--	--	--	--	--	--	--	--	--	--	--	--	--	--	--	--	--	--	--	--	--	--	--	--	--	--	--	--
c34821_g1	523	--	--	--	--	--	--	--	--	--	--	--	--	--	--	--	--	--	--	--	--	--	--	--	--	--	--	--	--
c51739_g1	2178	512932571	XP_004932578.1	1579	0	PREDICTED: LOW QUALITY PROTEIN: axin-like [Bombyx mori]	512932570	XM_004932521.1	777	0	PREDICTED: Bombyx mori axin-like (LOC101739893), mRNA	K02157	AXIN1	axin 1	http://www.genome.jp/dbget-bin/www_bget?ko:K02157	Q9V407	286	4.95735e-25	Axin OS=Drosophila melanogaster GN=Axn PE=1 SV=1	PF00615	Regulator of G protein signaling domain	GO:0038032	termination of G-protein coupled receptor signaling pathway	--	--	--	--	--	--
c43360_g1	549	357626934	EHJ76821.1	133	9.75584e-08	hypothetical protein KGM_07746 [Danaus plexippus]	--	--	--	--	--	--	--	--	--	--	--	--	--	--	--	--	--	--	--	--	--	--	--
c31458_g1	345	--	--	--	--	--	--	--	--	--	--	--	--	--	--	--	--	--	--	--	--	--	--	--	--	--	--	--	--
c68390_g1	280	--	--	--	--	--	--	--	--	--	--	--	--	--	--	--	--	--	--	--	--	--	--	--	--	--	--	--	--
c17337_g1	527	--	--	--	--	--	--	--	--	--	--	--	--	--	--	--	--	--	--	--	--	--	--	--	--	--	--	--	--
c54444_g2	201	--	--	--	--	--	--	--	--	--	--	--	--	--	--	--	--	--	--	--	--	--	--	--	--	--	--	--	--
c71170_g1	260	512933280	XP_004932752.1	264	5.43952e-25	PREDICTED: alkaline phosphatase, tissue-nonspecific isozyme-like [Bombyx mori]	--	--	--	--	--	--	--	--	--	P29523	142	4.27156e-10	Membrane-bound alkaline phosphatase OS=Bombyx mori GN=Alp-m PE=1 SV=4	PF00245	Alkaline phosphatase	GO:0008152	metabolic process	GO:0016791	phosphatase activity	--	--	KOG4126	Alkaline phosphatase
c42011_g1	948	--	--	--	--	--	--	--	--	--	--	--	--	--	--	--	--	--	--	--	--	--	--	--	--	--	--	--	--
c65218_g1	204	--	--	--	--	--	--	--	--	--	--	--	--	--	--	--	--	--	--	--	--	--	--	--	--	--	--	--	--
c10957_g1	251	--	--	--	--	--	--	--	--	--	--	--	--	--	--	--	--	--	--	--	--	--	--	--	--	--	--	--	--
c79430_g1	426	--	--	--	--	--	--	--	--	--	--	--	--	--	--	--	--	--	--	--	--	--	--	--	--	--	--	--	--
c10656_g1	299	--	--	--	--	--	--	--	--	--	--	--	--	--	--	--	--	--	--	--	--	--	--	--	--	--	--	--	--
c41766_g1	345	--	--	--	--	--	--	--	--	--	--	--	--	--	--	--	--	--	--	--	--	--	--	--	--	--	--	--	--
c82982_g1	249	--	--	--	--	--	--	--	--	--	--	--	--	--	--	--	--	--	--	--	--	--	--	--	--	--	--	--	--
c53998_g2	2255	--	--	--	--	--	--	--	--	--	--	--	--	--	--	--	--	--	--	PF00802//PF03964	Pneumovirus attachment glycoprotein G//Chorion family 2	GO:0019062//GO:0007275	virion attachment to host cell//multicellular organismal development	--	--	GO:0033644//GO:0042600//GO:0055036	host cell membrane//chorion//virion membrane	--	--
c73490_g1	596	169770775	XP_001819857.1	676	1.62561e-87	LEA domain protein [Aspergillus oryzae RIB40] >gi|238486762|ref|XP_002374619.1| LEA domain protein [Aspergillus flavus NRRL3357] >gi|83767716|dbj|BAE57855.1| unnamed protein product [Aspergillus oryzae RIB40] >gi|220699498|gb|EED55837.1| LEA domain protein [Aspergillus flavus NRRL3357] >gi|391867455|gb|EIT76701.1| LEA domain protein [Aspergillus oryzae 3.042] >gi|635508215|gb|KDE80199.1| LEA doma…	317144027	XM_001819805.2	547	0	Aspergillus oryzae RIB40 LEA domain protein, mRNA	--	--	--	--	Q8SVY9	112	6.30115e-06	Uncharacterized protein ECU03_1610 OS=Encephalitozoon cuniculi (strain GB-M1) GN=ECU03_1610 PE=1 SV=1	PF00430	ATP synthase B/B' CF(0)	GO:0015992//GO:0015986	proton transport//ATP synthesis coupled proton transport	GO:0015078	hydrogen ion transmembrane transporter activity	GO:0045263	proton-transporting ATP synthase complex, coupling factor F(o)	--	--
c40529_g1	418	--	--	--	--	--	--	--	--	--	--	--	--	--	--	--	--	--	--	PF02918	Pertussis toxin, subunit 2 and 3, C-terminal domain	GO:0009405	pathogenesis	--	--	GO:0005576	extracellular region	--	--
c48551_g3	597	--	--	--	--	--	--	--	--	--	--	--	--	--	--	--	--	--	--	--	--	--	--	--	--	--	--	--	--
c76178_g1	274	--	--	--	--	--	--	--	--	--	--	--	--	--	--	--	--	--	--	--	--	--	--	--	--	--	--	--	--
c62251_g1	667	--	--	--	--	--	--	--	--	--	--	--	--	--	--	--	--	--	--	--	--	--	--	--	--	--	--	--	--
c52850_g2	456	--	--	--	--	--	--	--	--	--	--	--	--	--	--	--	--	--	--	--	--	--	--	--	--	--	--	--	--
c57811_g1	233	--	--	--	--	--	--	--	--	--	--	--	--	--	--	--	--	--	--	--	--	--	--	--	--	--	--	--	--
c68756_g1	352	--	--	--	--	--	--	--	--	--	--	--	--	--	--	--	--	--	--	--	--	--	--	--	--	--	--	--	--
c54579_g1	3576	512901975	XP_004925261.1	1739	0	PREDICTED: protein Peter pan-like [Bombyx mori]	512901978	XM_004925205.1	369	0	PREDICTED: Bombyx mori DNA replication licensing factor Mcm3-like (LOC101738840), transcript variant X1, mRNA	K02541	MCM3	DNA replication licensing factor MCM3	http://www.genome.jp/dbget-bin/www_bget?ko:K02541	Q9XYU1	1017	1.8473e-119	DNA replication licensing factor Mcm3 OS=Drosophila melanogaster GN=Mcm3 PE=1 SV=1	PF00493//PF05072	MCM2/3/5 family//Herpesvirus UL43 protein	GO:0006260	DNA replication	GO:0005524//GO:0003677	ATP binding//DNA binding	GO:0019033//GO:0016020	viral tegument//membrane	KOG0479	DNA replication licensing factor, MCM3 component
c73041_g1	378	--	--	--	--	--	--	--	--	--	--	--	--	--	--	--	--	--	--	--	--	--	--	--	--	--	--	--	--
c48034_g6	482	--	--	--	--	--	--	--	--	--	--	--	--	--	--	--	--	--	--	--	--	--	--	--	--	--	--	--	--
c57774_g1	350	--	--	--	--	--	--	--	--	--	--	--	--	--	--	--	--	--	--	--	--	--	--	--	--	--	--	--	--
c27150_g2	290	--	--	--	--	--	--	--	--	--	--	--	--	--	--	--	--	--	--	--	--	--	--	--	--	--	--	--	--
c57677_g1	284	--	--	--	--	--	--	--	--	--	--	--	--	--	--	--	--	--	--	--	--	--	--	--	--	--	--	--	--
c88536_g1	245	--	--	--	--	--	--	--	--	--	--	--	--	--	--	--	--	--	--	--	--	--	--	--	--	--	--	--	--
c9322_g1	333	--	--	--	--	--	--	--	--	--	--	--	--	--	--	--	--	--	--	--	--	--	--	--	--	--	--	--	--
c47582_g1	3447	--	--	--	--	--	--	--	--	--	--	--	--	--	--	--	--	--	--	PF01440	Geminivirus AL2 protein	--	--	GO:0005198	structural molecule activity	GO:0019028	viral capsid	--	--
c37829_g1	3042	357625781	EHJ76101.1	3772	0	putative light protein [Danaus plexippus]	--	--	--	--	--	--	--	--	--	Q5KU39	1579	0	Vacuolar protein sorting-associated protein 41 homolog OS=Mus musculus GN=Vps41 PE=2 SV=1	PF13639//PF00400//PF00637//PF00924//PF13176//PF00515//PF14634//PF12678	Ring finger domain//WD domain, G-beta repeat//Region in Clathrin and VPS//Mechanosensitive ion channel//Tetratricopeptide repeat//Tetratricopeptide repeat//zinc-RING finger domain//RING-H2 zinc finger	GO:0006886//GO:0016192//GO:0055085	intracellular protein transport//vesicle-mediated transport//transmembrane transport	GO:0046872//GO:0008270//GO:0005515	metal ion binding//zinc ion binding//protein binding	GO:0016020//GO:0005622	membrane//intracellular	KOG2066	Vacuolar assembly/sorting protein VPS41
c64201_g1	339	--	--	--	--	--	--	--	--	--	--	--	--	--	--	--	--	--	--	--	--	--	--	--	--	--	--	--	--
c40594_g1	2990	91092544	XP_968085.1	3576	0	PREDICTED: pre-mRNA-splicing factor SYF1 [Tribolium castaneum]	572260192	XM_006608357.1	669	0	PREDICTED: Apis dorsata pre-mRNA-splicing factor SYF1-like (LOC102676944), mRNA	K12867	SYF1, XAB2	pre-mRNA-splicing factor SYF1	http://www.genome.jp/dbget-bin/www_bget?ko:K12867	Q9HCS7	2861	0	Pre-mRNA-splicing factor SYF1 OS=Homo sapiens GN=XAB2 PE=1 SV=2	PF05843//PF13176//PF00515//PF13181	Suppressor of forked protein (Suf)//Tetratricopeptide repeat//Tetratricopeptide repeat//Tetratricopeptide repeat	GO:0006397	mRNA processing	GO:0005515	protein binding	GO:0005634	nucleus	KOG2047	mRNA splicing factor
c45870_g1	1159	--	--	--	--	--	--	--	--	--	--	--	--	--	--	--	--	--	--	--	--	--	--	--	--	--	--	KOG3544	Collagens (type IV and type XIII), and related proteins
c48912_g5	4079	157344	AAA28508.1	1634	0	reverse transcriptase (put.); putative [Drosophila melanogaster]	--	--	--	--	--	--	--	--	--	Q9NBX4	1405	8.23895e-173	Probable RNA-directed DNA polymerase from transposon X-element OS=Drosophila melanogaster GN=X-element\ORF2 PE=3 SV=1	PF00078//PF03823//PF03810	Reverse transcriptase (RNA-dependent DNA polymerase)//Neurokinin B//Importin-beta N-terminal domain	GO:0006886//GO:0006278//GO:0007217	intracellular protein transport//RNA-dependent DNA replication//tachykinin receptor signaling pathway	GO:0008536//GO:0003723//GO:0003964	Ran GTPase binding//RNA binding//RNA-directed DNA polymerase activity	--	--	KOG1075	FOG: Reverse transcriptase
c69208_g1	287	--	--	--	--	--	--	--	--	--	--	--	--	--	--	--	--	--	--	--	--	--	--	--	--	--	--	--	--
c53788_g3	421	--	--	--	--	--	--	--	--	--	--	--	--	--	--	--	--	--	--	--	--	--	--	--	--	--	--	--	--
c75708_g1	233	--	--	--	--	--	--	--	--	--	--	--	--	--	--	--	--	--	--	--	--	--	--	--	--	--	--	--	--
c10942_g1	637	512898643	XP_004924447.1	389	1.56235e-40	PREDICTED: potassium voltage-gated channel protein Shaw-like [Bombyx mori]	--	--	--	--	--	--	--	--	--	--	--	--	--	--	--	--	--	--	--	--	--	--	--
c22455_g1	303	--	--	--	--	--	--	--	--	--	--	--	--	--	--	--	--	--	--	--	--	--	--	--	--	--	--	--	--
c44873_g1	988	--	--	--	--	--	--	--	--	--	--	--	--	--	--	--	--	--	--	--	--	--	--	--	--	--	--	--	--
c36795_g1	373	--	--	--	--	--	--	--	--	--	--	--	--	--	--	--	--	--	--	--	--	--	--	--	--	--	--	--	--
c5907_g2	269	--	--	--	--	--	--	--	--	--	--	--	--	--	--	--	--	--	--	--	--	--	--	--	--	--	--	--	--
c11365_g1	381	--	--	--	--	--	--	--	--	--	--	--	--	--	--	--	--	--	--	--	--	--	--	--	--	--	--	--	--
c42590_g1	1551	--	--	--	--	--	--	--	--	--	--	--	--	--	--	--	--	--	--	PF00837	Iodothyronine deiodinase	GO:0055114	oxidation-reduction process	GO:0004800	thyroxine 5'-deiodinase activity	--	--	--	--
c55182_g1	6508	512888408	XP_004922082.1	2883	0	PREDICTED: LOW QUALITY PROTEIN: actin-binding LIM protein 3 [Bombyx mori]	346713876	AK382999.1	530	0	Bombyx mori mRNA, clone: fepM17O18	K07520	ABLIM	actin-binding LIM protein	http://www.genome.jp/dbget-bin/www_bget?ko:K07520	O14639	716	3.11161e-77	Actin-binding LIM protein 1 OS=Homo sapiens GN=ABLIM1 PE=1 SV=3	PF06467//PF01101//PF02209//PF00412	MYM-type Zinc finger with FCS sequence motif//HMG14 and HMG17//Villin headpiece domain//LIM domain	GO:0007010	cytoskeleton organization	GO:0031492//GO:0003779//GO:0008270	nucleosomal DNA binding//actin binding//zinc ion binding	GO:0005634//GO:0000785	nucleus//chromatin	KOG1044	Actin-binding LIM Zn-finger protein Limatin involved in axon guidance
c22409_g1	239	--	--	--	--	--	--	--	--	--	--	--	--	--	--	--	--	--	--	--	--	--	--	--	--	--	--	--	--
c5337_g1	303	--	--	--	--	--	--	--	--	--	--	--	--	--	--	--	--	--	--	--	--	--	--	--	--	--	--	--	--
c54089_g1	1994	512935943	XP_004933399.1	1409	0	PREDICTED: carbohydrate sulfotransferase 11-like [Bombyx mori]	--	--	--	--	--	--	--	--	--	Q9JME2	301	3.3252e-28	Carbohydrate sulfotransferase 11 OS=Mus musculus GN=Chst11 PE=2 SV=1	PF03567	Sulfotransferase family	--	--	GO:0008146	sulfotransferase activity	GO:0016021	integral component of membrane	--	--
c59098_g1	459	--	--	--	--	--	--	--	--	--	--	--	--	--	--	--	--	--	--	--	--	--	--	--	--	--	--	--	--
c58990_g1	304	238487778	XP_002375127.1	553	1.31952e-65	t-complex protein 1, epsilon subunit, putative [Aspergillus flavus NRRL3357] >gi|220700006|gb|EED56345.1| t-complex protein 1, epsilon subunit, putative [Aspergillus flavus NRRL3357]	317143335	XM_001819364.2	291	1.72012e-149	Aspergillus oryzae RIB40 t-complex protein 1 subunit epsilon, mRNA	K09497	CCT5	T-complex protein 1 subunit epsilon	http://www.genome.jp/dbget-bin/www_bget?ko:K09497	Q9UTM4	498	1.70417e-59	T-complex protein 1 subunit epsilon OS=Schizosaccharomyces pombe (strain 972 / ATCC 24843) GN=cct5 PE=3 SV=1	PF00118	TCP-1/cpn60 chaperonin family	GO:0006457//GO:0044267	protein folding//cellular protein metabolic process	GO:0051082//GO:0005524	unfolded protein binding//ATP binding	GO:0005832	chaperonin-containing T-complex	KOG0357	Chaperonin complex component, TCP-1 epsilon subunit (CCT5)
c42503_g1	816	15825168	AAL09583.1	337	3.67676e-36	manducaFLRFamide I precursor [Mythimna unipuncta]	--	--	--	--	--	--	--	--	--	--	--	--	--	--	--	--	--	--	--	--	--	--	--
c56565_g1	265	84801		137	8.80572e-08	hypothetical protein 2 - silkworm transposon mag	--	--	--	--	--	--	--	--	--	--	--	--	--	--	--	--	--	--	--	--	--	--	--
c20043_g1	536	512893136	XP_004923106.1	376	3.91388e-38	PREDICTED: diacylglycerol kinase eta-like [Bombyx mori]	--	--	--	--	--	K00901	E2.7.1.107, DGK, dgkA	diacylglycerol kinase (ATP dependent)	http://www.genome.jp/dbget-bin/www_bget?ko:K00901	B3LXF2	188	5.93724e-15	Diacylglycerol kinase eta OS=Drosophila ananassae GN=GF18176 PE=3 SV=2	PF07647//PF02198	SAM domain (Sterile alpha motif)//Sterile alpha motif (SAM)/Pointed domain	--	--	GO:0043565//GO:0005515	sequence-specific DNA binding//protein binding	GO:0005634	nucleus	KOG1170	Diacylglycerol kinase
c87799_g1	282	--	--	--	--	--	--	--	--	--	--	--	--	--	--	--	--	--	--	--	--	--	--	--	--	--	--	--	--
c86916_g1	324	--	--	--	--	--	--	--	--	--	--	--	--	--	--	--	--	--	--	--	--	--	--	--	--	--	--	--	--
c37248_g1	554	--	--	--	--	--	--	--	--	--	--	--	--	--	--	--	--	--	--	PF05297	Herpesvirus latent membrane protein 1 (LMP1)	GO:0019087	transformation of host cell by virus	--	--	GO:0016021	integral component of membrane	--	--
c52435_g1	4539	357627188	EHJ76960.1	1465	0	putative zinc finger protein 347 [Danaus plexippus]	291201253	FP340428.1	417	0	35D18_HaBAC_fin, Helicoverpa armigera BAC, pupae DNA	K09228	KRAB	KRAB domain-containing zinc finger protein	http://www.genome.jp/dbget-bin/www_bget?ko:K09228	Q9UK13	217	2.83847e-16	Zinc finger protein 221 OS=Homo sapiens GN=ZNF221 PE=2 SV=3	PF02212//PF01346//PF04061//PF00096	Dynamin GTPase effector domain//Domain amino terminal to FKBP-type peptidyl-prolyl isomerase//ORMDL family//Zinc finger, C2H2 type	GO:0006457	protein folding	GO:0005525//GO:0003924//GO:0008270//GO:0046872//GO:0003676	GTP binding//GTPase activity//zinc ion binding//metal ion binding//nucleic acid binding	GO:0005622//GO:0016021	intracellular//integral component of membrane	KOG1721	FOG: Zn-finger
c85347_g1	367	--	--	--	--	--	--	--	--	--	--	--	--	--	--	--	--	--	--	--	--	--	--	--	--	--	--	--	--
c4749_g1	372	--	--	--	--	--	--	--	--	--	--	--	--	--	--	--	--	--	--	--	--	--	--	--	--	--	--	--	--
c52305_g3	1002	357613746	EHJ68700.1	399	1.47244e-43	hypothetical protein KGM_20694 [Danaus plexippus]	--	--	--	--	--	--	--	--	--	--	--	--	--	--	--	--	--	--	--	--	--	--	--
c78228_g1	208	--	--	--	--	--	--	--	--	--	--	--	--	--	--	--	--	--	--	--	--	--	--	--	--	--	--	--	--
c41883_g1	506	--	--	--	--	--	303283507	XM_003060999.1	42	7.8666e-11	Micromonas pusilla CCMP1545 predicted protein, mRNA	--	--	--	--	--	--	--	--	--	--	--	--	--	--	--	--	--	--
c46653_g4	2165	--	--	--	--	--	--	--	--	--	--	--	--	--	--	--	--	--	--	--	--	--	--	--	--	--	--	--	--
c58497_g1	287	--	--	--	--	--	--	--	--	--	--	--	--	--	--	--	--	--	--	--	--	--	--	--	--	--	--	--	--
c33774_g1	386	--	--	--	--	--	--	--	--	--	--	--	--	--	--	--	--	--	--	--	--	--	--	--	--	--	--	--	--
c83380_g1	208	--	--	--	--	--	--	--	--	--	--	--	--	--	--	--	--	--	--	--	--	--	--	--	--	--	--	--	--
c56593_g1	600	--	--	--	--	--	--	--	--	--	--	--	--	--	--	--	--	--	--	--	--	--	--	--	--	--	--	--	--
c17461_g1	293	--	--	--	--	--	--	--	--	--	--	--	--	--	--	--	--	--	--	--	--	--	--	--	--	--	--	--	--
c46751_g2	893	--	--	--	--	--	--	--	--	--	--	--	--	--	--	--	--	--	--	--	--	--	--	--	--	--	--	--	--
c78321_g1	374	--	--	--	--	--	--	--	--	--	--	--	--	--	--	--	--	--	--	PF09472	Tetrahydromethanopterin S-methyltransferase, F subunit (MtrF)	GO:0046656//GO:0015948	folic acid biosynthetic process//methanogenesis	GO:0030269	tetrahydromethanopterin S-methyltransferase activity	GO:0016020	membrane	--	--
c3260_g1	355	--	--	--	--	--	--	--	--	--	--	--	--	--	--	--	--	--	--	--	--	--	--	--	--	--	--	--	--
c39113_g1	3244	631396016	XP_007932388.1	320	4.00422e-28	hypothetical protein MYCFIDRAFT_84735 [Pseudocercospora fijiensis CIRAD86] >gi|452977292|gb|EME77063.1| hypothetical protein MYCFIDRAFT_84735 [Pseudocercospora fijiensis CIRAD86]	--	--	--	--	--	--	--	--	--	Q8JMN0	750	2.65498e-80	RNA-directed RNA polymerase L OS=Borna disease virus GN=L PE=3 SV=1	PF00946	Mononegavirales RNA dependent RNA polymerase	GO:0009451//GO:0006144//GO:0006370	RNA modification//purine nucleobase metabolic process//7-methylguanosine mRNA capping	GO:0004482//GO:0003968//GO:0005524	mRNA (guanine-N7-)-methyltransferase activity//RNA-directed RNA polymerase activity//ATP binding	GO:0019012//GO:0031379	virion//RNA-directed RNA polymerase complex	--	--
c51468_g1	3321	357613215	EHJ68383.1	858	2.34374e-96	hypothetical protein KGM_14926 [Danaus plexippus]	--	--	--	--	--	--	--	--	--	Q8N2E2	260	2.53073e-21	von Willebrand factor D and EGF domain-containing protein OS=Homo sapiens GN=VWDE PE=2 SV=4	--	--	--	--	--	--	--	--	KOG1225	Teneurin-1 and related extracellular matrix proteins, contain EGF-like repeats
c45427_g1	1351	--	--	--	--	--	--	--	--	--	--	--	--	--	--	--	--	--	--	--	--	--	--	--	--	--	--	--	--
c28998_g1	339	--	--	--	--	--	--	--	--	--	--	--	--	--	--	--	--	--	--	--	--	--	--	--	--	--	--	--	--
c21917_g1	721	--	--	--	--	--	298402912	GU808252.1	570	0	Ostrinia nubilalis strain Z fatty-acyl CoA reductase 3 mRNA, complete cds	--	--	--	--	--	--	--	--	PF05001	RNA polymerase Rpb1 C-terminal repeat	GO:0006366	transcription from RNA polymerase II promoter	GO:0003677	DNA binding	GO:0005665	DNA-directed RNA polymerase II, core complex	--	--
c53953_g2	733	343481903	AEM44817.1	303	7.47295e-28	unknown [Pectinophora gossypiella]	--	--	--	--	--	--	--	--	--	--	--	--	--	--	--	--	--	--	--	--	--	--	--
c81783_g1	221	--	--	--	--	--	--	--	--	--	--	--	--	--	--	--	--	--	--	--	--	--	--	--	--	--	--	--	--
c53228_g1	2182	433338981	BAM73846.1	2479	0	cytochrome P450 [Bombyx mori]	--	--	--	--	--	--	--	--	--	Q9V6D6	1804	0	Probable cytochrome P450 301a1, mitochondrial OS=Drosophila melanogaster GN=Cyp301a1 PE=2 SV=1	PF00067	Cytochrome P450	GO:0055114	oxidation-reduction process	GO:0005506//GO:0016705//GO:0020037	iron ion binding//oxidoreductase activity, acting on paired donors, with incorporation or reduction of molecular oxygen//heme binding	--	--	KOG0159	Cytochrome P450 CYP11/CYP12/CYP24/CYP27 subfamilies
c73379_g1	570	--	--	--	--	--	--	--	--	--	--	--	--	--	--	--	--	--	--	--	--	--	--	--	--	--	--	--	--
c28235_g1	274	--	--	--	--	--	--	--	--	--	--	--	--	--	--	--	--	--	--	--	--	--	--	--	--	--	--	--	--
c35966_g1	454	--	--	--	--	--	--	--	--	--	--	--	--	--	--	--	--	--	--	--	--	--	--	--	--	--	--	--	--
c86085_g1	637	--	--	--	--	--	--	--	--	--	--	--	--	--	--	--	--	--	--	--	--	--	--	--	--	--	--	--	--
c83837_g1	274	--	--	--	--	--	--	--	--	--	--	--	--	--	--	--	--	--	--	--	--	--	--	--	--	--	--	--	--
c15586_g1	442	669092492	AII01118.1	661	1.10944e-84	ionotropic receptors, partial [Dendrolimus houi]	--	--	--	--	--	--	--	--	--	--	--	--	--	PF07127	Late nodulin protein	GO:0009878	nodule morphogenesis	GO:0046872	metal ion binding	--	--	--	--
c86995_g1	395	--	--	--	--	--	--	--	--	--	--	--	--	--	--	--	--	--	--	--	--	--	--	--	--	--	--	--	--
c43547_g1	1291	512910010	XP_004927062.1	1555	0	PREDICTED: zinc carboxypeptidase A 1-like [Bombyx mori]	--	--	--	--	--	--	--	--	--	P04069	221	1.10288e-18	Carboxypeptidase B OS=Astacus astacus PE=1 SV=1	PF00246	Zinc carboxypeptidase	GO:0006508	proteolysis	GO:0008270//GO:0004181	zinc ion binding//metallocarboxypeptidase activity	--	--	KOG2650	Zinc carboxypeptidase
c51949_g1	2349	512896586	XP_004923946.1	872	1.49747e-106	PREDICTED: uncharacterized protein LOC101740268 isoform X1 [Bombyx mori]	--	--	--	--	--	--	--	--	--	Q3TBT3	156	1.18738e-09	Stimulator of interferon genes protein OS=Mus musculus GN=Tmem173 PE=1 SV=2	--	--	--	--	--	--	--	--	--	--
c60927_g1	219	--	--	--	--	--	--	--	--	--	--	--	--	--	--	--	--	--	--	--	--	--	--	--	--	--	--	--	--
c9047_g1	498	--	--	--	--	--	--	--	--	--	--	--	--	--	--	--	--	--	--	--	--	--	--	--	--	--	--	--	--
c1974_g1	294	--	--	--	--	--	--	--	--	--	--	--	--	--	--	--	--	--	--	--	--	--	--	--	--	--	--	--	--
c69666_g1	228	--	--	--	--	--	--	--	--	--	--	--	--	--	--	--	--	--	--	--	--	--	--	--	--	--	--	--	--
c10779_g1	246	--	--	--	--	--	--	--	--	--	--	--	--	--	--	--	--	--	--	--	--	--	--	--	--	--	--	--	--
c53849_g3	4622	357621227	EHJ73131.1	2304	0	hypothetical protein KGM_00476 [Danaus plexippus]	--	--	--	--	--	K02149	ATPeV1D, ATP6M	V-type H+-transporting ATPase subunit D	http://www.genome.jp/dbget-bin/www_bget?ko:K02149	Q9V7D2	345	8.26746e-34	V-type proton ATPase subunit D 1 OS=Drosophila melanogaster GN=Vha36-1 PE=2 SV=1	PF01813//PF04509//PF02916	ATP synthase subunit D//CheC-like family//DNA polymerase processivity factor	GO:0006260//GO:0006810	DNA replication//transport	GO:0016787//GO:0042626	hydrolase activity//ATPase activity, coupled to transmembrane movement of substances	--	--	KOG1647	Vacuolar H+-ATPase V1 sector, subunit D
c53084_g1	236	--	--	--	--	--	--	--	--	--	--	--	--	--	--	--	--	--	--	--	--	--	--	--	--	--	--	--	--
c66508_g1	281	--	--	--	--	--	--	--	--	--	--	--	--	--	--	--	--	--	--	--	--	--	--	--	--	--	--	--	--
c37359_g1	486	--	--	--	--	--	--	--	--	--	--	--	--	--	--	--	--	--	--	--	--	--	--	--	--	--	--	--	--
c19402_g1	258	--	--	--	--	--	--	--	--	--	--	--	--	--	--	--	--	--	--	--	--	--	--	--	--	--	--	--	--
c88875_g1	210	--	--	--	--	--	--	--	--	--	--	--	--	--	--	--	--	--	--	--	--	--	--	--	--	--	--	--	--
c55409_g1	4032	357612798	EHJ68173.1	4788	0	hypothetical protein KGM_12574 [Danaus plexippus]	--	--	--	--	--	--	--	--	--	Q9VFB7	1900	0	Trafficking protein particle complex subunit 10 OS=Drosophila melanogaster GN=SIDL PE=1 SV=1	--	--	--	--	--	--	--	--	KOG1931	Putative transmembrane protein
c42371_g1	2414	512897669	XP_004924209.1	2567	0	PREDICTED: uncharacterized protein LOC101738384 [Bombyx mori]	--	--	--	--	--	--	--	--	--	--	--	--	--	--	--	--	--	--	--	--	--	--	--
c5695_g1	303	--	--	--	--	--	--	--	--	--	--	--	--	--	--	--	--	--	--	--	--	--	--	--	--	--	--	--	--
c32189_g1	209	--	--	--	--	--	--	--	--	--	--	--	--	--	--	--	--	--	--	--	--	--	--	--	--	--	--	--	--
c78483_g1	269	--	--	--	--	--	--	--	--	--	--	--	--	--	--	--	--	--	--	--	--	--	--	--	--	--	--	--	--
c83458_g1	225	--	--	--	--	--	--	--	--	--	--	--	--	--	--	--	--	--	--	--	--	--	--	--	--	--	--	--	--
c84809_g1	342	--	--	--	--	--	--	--	--	--	--	--	--	--	--	--	--	--	--	--	--	--	--	--	--	--	--	--	--
c70762_g1	261	--	--	--	--	--	--	--	--	--	--	--	--	--	--	--	--	--	--	--	--	--	--	--	--	--	--	--	--
c70528_g1	225	--	--	--	--	--	--	--	--	--	--	--	--	--	--	--	--	--	--	--	--	--	--	--	--	--	--	--	--
c12008_g1	612	357612403	EHJ67972.1	562	1.41136e-63	hypothetical protein KGM_08453 [Danaus plexippus]	--	--	--	--	--	--	--	--	--	--	--	--	--	--	--	GO:0009987	cellular process	GO:0016829	lyase activity	--	--	--	--
c73281_g1	216	--	--	--	--	--	--	--	--	--	--	--	--	--	--	--	--	--	--	--	--	--	--	--	--	--	--	--	--
c42837_g1	999	--	--	--	--	--	--	--	--	--	--	--	--	--	--	--	--	--	--	--	--	--	--	--	--	--	--	--	--
c69005_g1	424	--	--	--	--	--	--	--	--	--	--	--	--	--	--	--	--	--	--	--	--	--	--	--	--	--	--	--	--
c83267_g1	221	--	--	--	--	--	--	--	--	--	--	--	--	--	--	--	--	--	--	--	--	--	--	--	--	--	--	--	--
c51834_g1	1790	512921346	XP_004929854.1	445	4.18058e-43	PREDICTED: uncharacterized protein LOC101738134 [Bombyx mori]	512921345	XM_004929797.1	61	7.99565e-21	PREDICTED: Bombyx mori uncharacterized LOC101738134 (LOC101738134), mRNA	--	--	--	--	P46379	129	2.66772e-06	Large proline-rich protein BAG6 OS=Homo sapiens GN=BAG6 PE=1 SV=2	--	--	--	--	--	--	--	--	--	--
c20393_g1	420	512932481	XP_004932555.1	359	1.11519e-40	PREDICTED: uncharacterized protein LOC101736861 isoform X2 [Bombyx mori]	--	--	--	--	--	--	--	--	--	--	--	--	--	--	--	--	--	--	--	--	--	--	--
c48211_g2	4210	57506568	BAD86655.1	4253	0	reverse transcriptase [Bombyx mori]	--	--	--	--	--	--	--	--	--	P0CT39	787	1.05338e-84	Transposon Tf2-6 polyprotein OS=Schizosaccharomyces pombe (strain 972 / ATCC 24843) GN=Tf2-6 PE=3 SV=1	PF00665//PF00078//PF00098	Integrase core domain//Reverse transcriptase (RNA-dependent DNA polymerase)//Zinc knuckle	GO:0015074//GO:0006259//GO:0006278	DNA integration//DNA metabolic process//RNA-dependent DNA replication	GO:0003676//GO:0008270//GO:0003723//GO:0003964	nucleic acid binding//zinc ion binding//RNA binding//RNA-directed DNA polymerase activity	--	--	KOG0017	FOG: Transposon-encoded proteins with TYA, reverse transcriptase, integrase domains in various combinations
c60591_g1	279	512912120	XP_004927578.1	472	3.26519e-52	PREDICTED: dynein heavy chain 3, axonemal-like [Bombyx mori]	--	--	--	--	--	K10408	DNAH	dynein heavy chain, axonemal	http://www.genome.jp/dbget-bin/www_bget?ko:K10408	Q8TD57	296	3.93605e-30	Dynein heavy chain 3, axonemal OS=Homo sapiens GN=DNAH3 PE=2 SV=1	--	--	--	--	--	--	--	--	KOG3595	Dyneins, heavy chain
c48798_g1	4314	357619139	EHJ71829.1	1301	8.86723e-161	Hrp59 protein [Danaus plexippus]	195048235	XM_001992458.1	36	1.53846e-06	Drosophila grimshawi GH24171 (Dgri\GH24171), mRNA	--	--	--	--	Q9P2K5	449	8.96901e-45	Myelin expression factor 2 OS=Homo sapiens GN=MYEF2 PE=1 SV=3	PF00076	RNA recognition motif. (a.k.a. RRM, RBD, or RNP domain)	--	--	GO:0003676//GO:0000166	nucleic acid binding//nucleotide binding	--	--	KOG4212	RNA-binding protein hnRNP-M
c42415_g1	882	--	--	--	--	--	--	--	--	--	--	--	--	--	--	--	--	--	--	--	--	--	--	--	--	--	--	--	--
c42480_g1	987	--	--	--	--	--	--	--	--	--	--	--	--	--	--	--	--	--	--	--	--	--	--	--	--	--	--	--	--
c47514_g1	2800	357618938	EHJ71722.1	3213	0	putative Kelch-like protein 10 [Danaus plexippus]	--	--	--	--	--	K10448	KLHL10	kelch-like protein 10	http://www.genome.jp/dbget-bin/www_bget?ko:K10448	Q6JEL2	1518	0	Kelch-like protein 10 OS=Homo sapiens GN=KLHL10 PE=1 SV=1	PF00651//PF01344//PF07646	BTB/POZ domain//Kelch motif//Kelch motif	--	--	GO:0005515	protein binding	--	--	KOG4441	Proteins containing BTB/POZ and Kelch domains, involved in regulatory/signal transduction processes
c25742_g1	395	--	--	--	--	--	--	--	--	--	--	--	--	--	--	--	--	--	--	--	--	--	--	--	--	--	--	--	--
c52006_g1	4180	512919180	XP_004929312.1	648	2.61679e-69	PREDICTED: centromere-associated protein E-like [Bombyx mori]	--	--	--	--	--	--	--	--	--	--	--	--	--	PF12549//PF00038//PF04593//PF01576	Tyrosine hydroxylase N terminal//Intermediate filament protein//Selenoprotein P, C terminal region//Myosin tail	GO:0055114//GO:0006570	oxidation-reduction process//tyrosine metabolic process	GO:0004511//GO:0008430//GO:0005198//GO:0003774	tyrosine 3-monooxygenase activity//selenium binding//structural molecule activity//motor activity	GO:0005882//GO:0016459	intermediate filament//myosin complex	--	--
c62674_g1	402	512897669	XP_004924209.1	588	4.32672e-67	PREDICTED: uncharacterized protein LOC101738384 [Bombyx mori]	--	--	--	--	--	--	--	--	--	Q90953	183	1.20631e-14	Versican core protein OS=Gallus gallus GN=VCAN PE=2 SV=1	PF00059	Lectin C-type domain	--	--	GO:0030246	carbohydrate binding	--	--	KOG4297	C-type lectin
c31056_g1	205	512899240	XP_004924594.1	206	2.03355e-17	PREDICTED: luciferin 4-monooxygenase-like [Bombyx mori]	--	--	--	--	--	--	--	--	--	--	--	--	--	--	--	--	--	--	--	--	--	--	--
c46789_g3	717	--	--	--	--	--	--	--	--	--	--	--	--	--	--	--	--	--	--	--	--	--	--	--	--	--	--	--	--
c15281_g1	528	--	--	--	--	--	--	--	--	--	--	--	--	--	--	--	--	--	--	--	--	--	--	--	--	--	--	--	--
c28114_g1	554	380713852	AFD99127.1	481	1.37966e-56	chymotrypsin-like proteinase [Bombyx mori]	--	--	--	--	--	--	--	--	--	Q17025	157	8.55961e-12	Chymotrypsin-2 OS=Anopheles gambiae GN=CHYM2 PE=2 SV=3	PF00089	Trypsin	GO:0006508	proteolysis	GO:0004252//GO:0008233	serine-type endopeptidase activity//peptidase activity	--	--	--	--
c75328_g1	327	--	--	--	--	--	--	--	--	--	--	--	--	--	--	--	--	--	--	--	--	--	--	--	--	--	--	--	--
c38958_g1	5195	512926343	XP_004931062.1	2657	0	PREDICTED: LIM domain-containing protein jub-like [Bombyx mori]	573907004	XM_006641159.1	153	1.69227e-71	PREDICTED: Lepisosteus oculatus Wilms tumor protein 1-interacting protein homolog (LOC102689350), mRNA	K16682	AJUBA, LIMD1, WTIP	LIM domain-containing protein	http://www.genome.jp/dbget-bin/www_bget?ko:K16682	Q9VY77	1112	6.03924e-131	LIM domain-containing protein jub OS=Drosophila melanogaster GN=jub PE=1 SV=3	PF00412//PF01277	LIM domain//Oleosin	--	--	GO:0008270	zinc ion binding	GO:0012511//GO:0016021	monolayer-surrounded lipid storage body//integral component of membrane	KOG1701	Focal adhesion adaptor protein Paxillin and related LIM proteins
c31567_g1	219	--	--	--	--	--	--	--	--	--	--	--	--	--	--	--	--	--	--	--	--	--	--	--	--	--	--	--	--
c12205_g1	611	--	--	--	--	--	453040674	JX683363.1	199	5.09372e-98	Ostrinia zealis fatty-acyl reductase (pgFAR) mRNA, complete cds	--	--	--	--	--	--	--	--	--	--	--	--	--	--	--	--	--	--
c76992_g1	362	--	--	--	--	--	--	--	--	--	--	--	--	--	--	--	--	--	--	--	--	--	--	--	--	--	--	--	--
c19452_g2	281	--	--	--	--	--	--	--	--	--	--	--	--	--	--	--	--	--	--	--	--	--	--	--	--	--	--	--	--
c42239_g1	3084	585695869	XP_006822105.1	556	1.41462e-59	PREDICTED: RNA-directed DNA polymerase from mobile element jockey-like, partial [Saccoglossus kowalevskii]	--	--	--	--	--	--	--	--	--	Q9NBX4	281	4.95718e-24	Probable RNA-directed DNA polymerase from transposon X-element OS=Drosophila melanogaster GN=X-element\ORF2 PE=3 SV=1	PF02180//PF00078	Bcl-2 homology region 4//Reverse transcriptase (RNA-dependent DNA polymerase)	GO:0006278//GO:0042981	RNA-dependent DNA replication//regulation of apoptotic process	GO:0003723//GO:0003964	RNA binding//RNA-directed DNA polymerase activity	--	--	KOG1075	FOG: Reverse transcriptase
c28886_g1	582	--	--	--	--	--	--	--	--	--	--	--	--	--	--	--	--	--	--	--	--	--	--	--	--	--	--	--	--
c10917_g1	343	--	--	--	--	--	--	--	--	--	--	--	--	--	--	--	--	--	--	PF00366	Ribosomal protein S17	GO:0042254//GO:0006412	ribosome biogenesis//translation	GO:0003735	structural constituent of ribosome	GO:0005622//GO:0005840	intracellular//ribosome	--	--
c65657_g1	346	--	--	--	--	--	--	--	--	--	--	--	--	--	--	--	--	--	--	--	--	--	--	--	--	--	--	--	--
c31031_g1	202	--	--	--	--	--	--	--	--	--	--	--	--	--	--	--	--	--	--	--	--	--	--	--	--	--	--	--	--
c73636_g1	1342	--	--	--	--	--	--	--	--	--	--	--	--	--	--	--	--	--	--	--	--	--	--	--	--	--	--	--	--
c4902_g1	228	--	--	--	--	--	--	--	--	--	--	--	--	--	--	--	--	--	--	--	--	--	--	--	--	--	--	--	--
c75112_g1	252	--	--	--	--	--	--	--	--	--	--	--	--	--	--	--	--	--	--	--	--	--	--	--	--	--	--	--	--
c47605_g1	1186	357622306	EHJ73839.1	1040	2.3808e-138	thioredoxin peroxidase [Danaus plexippus]	52630966	AY737554.1	39	8.91078e-09	Toxoptera citricida putative cytosolic thioredoxin peroxidase mRNA, complete cds	K03386	E1.11.1.15, PRDX, ahpC	peroxiredoxin (alkyl hydroperoxide reductase subunit C)	http://www.genome.jp/dbget-bin/www_bget?ko:K03386	Q9Z0V6	737	1.10642e-93	Thioredoxin-dependent peroxide reductase, mitochondrial OS=Rattus norvegicus GN=Prdx3 PE=1 SV=2	PF10417//PF00578//PF08534	C-terminal domain of 1-Cys peroxiredoxin//AhpC/TSA family//Redoxin	GO:0006979//GO:0006804//GO:0055114	response to oxidative stress//peroxidase reaction//oxidation-reduction process	GO:0051920//GO:0016491//GO:0016209//GO:0004601	peroxiredoxin activity//oxidoreductase activity//antioxidant activity//peroxidase activity	--	--	KOG0852	Alkyl hydroperoxide reductase, thiol specific antioxidant and related enzymes
c64318_g1	255	--	--	--	--	--	--	--	--	--	--	--	--	--	--	--	--	--	--	--	--	--	--	--	--	--	--	--	--
c82624_g1	236	--	--	--	--	--	--	--	--	--	--	--	--	--	--	--	--	--	--	--	--	--	--	--	--	--	--	--	--
c38673_g2	2811	298204363	ADI61830.1	1617	0	endonuclease-reverse transcriptase [Bombyx mori]	--	--	--	--	--	--	--	--	--	Q10126	345	4.71709e-34	Putative uncharacterized transposon-derived protein F52C9.6 OS=Caenorhabditis elegans GN=F52C9.6 PE=5 SV=1	PF00078	Reverse transcriptase (RNA-dependent DNA polymerase)	GO:0006278	RNA-dependent DNA replication	GO:0003964//GO:0003723//GO:0004519	RNA-directed DNA polymerase activity//RNA binding//endonuclease activity	--	--	KOG1075	FOG: Reverse transcriptase
c49218_g1	1215	--	--	--	--	--	--	--	--	--	--	--	--	--	--	--	--	--	--	--	--	--	--	--	--	--	--	--	--
c64231_g1	247	238496737	XP_002379604.1	335	1.01672e-38	conserved hypothetical protein [Aspergillus flavus NRRL3357] >gi|317146992|ref|XP_003189875.1| hypothetical protein AOR_1_624014 [Aspergillus oryzae RIB40] >gi|220694484|gb|EED50828.1| conserved hypothetical protein [Aspergillus flavus NRRL3357]	317146991	XM_003189827.1	232	8.57236e-117	Aspergillus oryzae RIB40 hypothetical protein, mRNA	--	--	--	--	--	--	--	--	--	--	--	--	--	--	--	--	--	--
c61742_g1	308	--	--	--	--	--	--	--	--	--	--	--	--	--	--	--	--	--	--	--	--	--	--	--	--	--	--	--	--
c86056_g1	533	--	--	--	--	--	--	--	--	--	--	--	--	--	--	--	--	--	--	--	--	--	--	--	--	--	--	--	--
c53511_g1	3860	512886408	XP_004921751.1	975	3.95487e-119	PREDICTED: protein sarah-like [Bombyx mori]	--	--	--	--	--	K17905	RCAN3	calcipression-3	http://www.genome.jp/dbget-bin/www_bget?ko:K17905	Q9XZL8	701	1.11762e-81	Protein sarah OS=Drosophila melanogaster GN=sra PE=1 SV=1	PF11057//PF04847//PF01414	Cortexin of kidney//Calcipressin//Delta serrate ligand	GO:0007154//GO:0019722	cell communication//calcium-mediated signaling	--	--	GO:0016020//GO:0031224	membrane//intrinsic component of membrane	KOG4019	Calcineurin-mediated signaling pathway inhibitor DSCR1
c39627_g1	1110	343469130	AEM43806.1	1676	0	membrane-bound alkaline phosphatase [Ostrinia furnacalis]	343469129	JN392445.1	1081	0	Ostrinia furnacalis membrane-bound alkaline phosphatase (mALP) mRNA, complete cds	K01077	E3.1.3.1, phoA, phoB	alkaline phosphatase	http://www.genome.jp/dbget-bin/www_bget?ko:K01077	P29523	1104	4.04991e-145	Membrane-bound alkaline phosphatase OS=Bombyx mori GN=Alp-m PE=1 SV=4	PF02811//PF00245	PHP domain//Alkaline phosphatase	GO:0008152//GO:0046486//GO:0046656//GO:0016311//GO:0019497	metabolic process//glycerolipid metabolic process//folic acid biosynthetic process//dephosphorylation//hexachlorocyclohexane metabolic process	GO:0004035//GO:0016791//GO:0003824	alkaline phosphatase activity//phosphatase activity//catalytic activity	--	--	KOG4126	Alkaline phosphatase
c49059_g4	345	--	--	--	--	--	--	--	--	--	--	--	--	--	--	--	--	--	--	--	--	--	--	--	--	--	--	--	--
c35036_g1	222	357626940	EHJ76827.1	118	1.65082e-06	hypothetical protein KGM_07752 [Danaus plexippus]	--	--	--	--	--	--	--	--	--	--	--	--	--	--	--	--	--	--	--	--	--	--	--
c35002_g1	575	--	--	--	--	--	--	--	--	--	--	--	--	--	--	--	--	--	--	--	--	--	--	--	--	--	--	--	--
c29871_g1	439	--	--	--	--	--	--	--	--	--	--	--	--	--	--	--	--	--	--	--	--	--	--	--	--	--	--	--	--
c43054_g1	1075	--	--	--	--	--	--	--	--	--	--	--	--	--	--	--	--	--	--	PF05434	TMEM9	--	--	--	--	GO:0016021	integral component of membrane	--	--
c27237_g1	275	--	--	--	--	--	--	--	--	--	--	--	--	--	--	--	--	--	--	--	--	--	--	--	--	--	--	--	--
c2555_g1	324	--	--	--	--	--	--	--	--	--	--	--	--	--	--	--	--	--	--	--	--	--	--	--	--	--	--	--	--
c62411_g1	396	--	--	--	--	--	--	--	--	--	--	--	--	--	--	--	--	--	--	--	--	--	--	--	--	--	--	--	--
c50646_g1	1100	--	--	--	--	--	--	--	--	--	--	--	--	--	--	--	--	--	--	--	--	--	--	--	--	--	--	--	--
c67003_g1	202	--	--	--	--	--	--	--	--	--	--	--	--	--	--	--	--	--	--	--	--	--	--	--	--	--	--	--	--
c22977_g1	313	--	--	--	--	--	--	--	--	--	--	--	--	--	--	--	--	--	--	--	--	--	--	--	--	--	--	--	--
c86830_g1	219	--	--	--	--	--	--	--	--	--	--	--	--	--	--	--	--	--	--	--	--	--	--	--	--	--	--	--	--
c73189_g1	371	--	--	--	--	--	--	--	--	--	--	--	--	--	--	--	--	--	--	--	--	--	--	--	--	--	--	--	--
c64773_g1	369	--	--	--	--	--	--	--	--	--	--	--	--	--	--	--	--	--	--	--	--	--	--	--	--	--	--	--	--
c12352_g1	486	--	--	--	--	--	--	--	--	--	--	--	--	--	--	--	--	--	--	--	--	--	--	--	--	--	--	--	--
c4776_g1	490	--	--	--	--	--	--	--	--	--	--	--	--	--	--	--	--	--	--	--	--	--	--	--	--	--	--	--	--
c77814_g1	327	--	--	--	--	--	--	--	--	--	--	--	--	--	--	--	--	--	--	--	--	--	--	--	--	--	--	--	--
c76168_g1	214	--	--	--	--	--	--	--	--	--	--	--	--	--	--	--	--	--	--	--	--	--	--	--	--	--	--	--	--
c42122_g1	1290	270015511	EFA11959.1	158	4.85881e-17	hypothetical protein TcasGA2_TC005046 [Tribolium castaneum]	--	--	--	--	--	--	--	--	--	--	--	--	--	--	--	--	--	--	--	--	--	--	--
c36665_g1	706	--	--	--	--	--	--	--	--	--	--	--	--	--	--	--	--	--	--	--	--	--	--	--	--	--	--	--	--
c42754_g1	499	--	--	--	--	--	--	--	--	--	--	--	--	--	--	--	--	--	--	--	--	--	--	--	--	--	--	--	--
c39445_g1	863	--	--	--	--	--	--	--	--	--	--	--	--	--	--	--	--	--	--	--	--	--	--	--	--	--	--	--	--
c13713_g1	473	--	--	--	--	--	--	--	--	--	--	--	--	--	--	--	--	--	--	--	--	--	--	--	--	--	--	--	--
c32313_g1	835	--	--	--	--	--	--	--	--	--	--	--	--	--	--	--	--	--	--	--	--	--	--	--	--	--	--	--	--
c46419_g2	1327	126742098	ABO27097.1	1500	0	storage protein 1 [Omphisa fuscidentalis]	126742097	EF429084.1	391	0	Omphisa fuscidentalis storage protein 1 (SP1) mRNA, complete cds	--	--	--	--	P14296	1034	1.35974e-131	Arylphorin subunit alpha OS=Manduca sexta PE=2 SV=1	--	--	--	--	--	--	--	--	--	--
c54342_g1	4319	512903088	XP_004925533.1	2506	0	PREDICTED: mitochondrial import receptor subunit TOM70-like [Bombyx mori]	512903087	XM_004925476.1	574	0	PREDICTED: Bombyx mori mitochondrial import receptor subunit TOM70-like (LOC101739074), mRNA	K17768	TOM70	mitochondrial import receptor subunit TOM70	http://www.genome.jp/dbget-bin/www_bget?ko:K17768	O94826	1231	7.72688e-151	Mitochondrial import receptor subunit TOM70 OS=Homo sapiens GN=TOMM70A PE=1 SV=1	PF13181//PF00515//PF13176//PF02609	Tetratricopeptide repeat//Tetratricopeptide repeat//Tetratricopeptide repeat//Exonuclease VII small subunit	GO:0006308	DNA catabolic process	GO:0005515//GO:0008855	protein binding//exodeoxyribonuclease VII activity	GO:0009318	exodeoxyribonuclease VII complex	KOG0547	Translocase of outer mitochondrial membrane complex, subunit TOM70/TOM72
c30589_g1	441	512912120	XP_004927578.1	614	2.79678e-70	PREDICTED: dynein heavy chain 3, axonemal-like [Bombyx mori]	--	--	--	--	--	K10408	DNAH	dynein heavy chain, axonemal	http://www.genome.jp/dbget-bin/www_bget?ko:K10408	Q8TD57	162	8.79272e-12	Dynein heavy chain 3, axonemal OS=Homo sapiens GN=DNAH3 PE=2 SV=1	PF01920	Prefoldin subunit	GO:0006457	protein folding	GO:0051082	unfolded protein binding	GO:0016272	prefoldin complex	--	--
c62367_g1	207	--	--	--	--	--	--	--	--	--	--	--	--	--	--	--	--	--	--	--	--	--	--	--	--	--	--	--	--
c62282_g1	260	--	--	--	--	--	--	--	--	--	--	--	--	--	--	--	--	--	--	PF13639//PF00397	Ring finger domain//WW domain	--	--	GO:0008270//GO:0005515	zinc ion binding//protein binding	--	--	--	--
c33457_g1	304	--	--	--	--	--	--	--	--	--	--	--	--	--	--	--	--	--	--	--	--	--	--	--	--	--	--	--	--
c33424_g1	256	--	--	--	--	--	--	--	--	--	--	--	--	--	--	--	--	--	--	--	--	--	--	--	--	--	--	--	--
c43669_g1	574	--	--	--	--	--	--	--	--	--	--	--	--	--	--	--	--	--	--	--	--	--	--	--	--	--	--	--	--
c82153_g1	266	512930181	XP_004932003.1	184	3.24501e-14	PREDICTED: guanine nucleotide-binding protein-like 3 homolog [Bombyx mori]	--	--	--	--	--	--	--	--	--	--	--	--	--	--	--	--	--	--	--	--	--	--	--
c48051_g2	247	--	--	--	--	--	--	--	--	--	--	--	--	--	--	--	--	--	--	--	--	--	--	--	--	--	--	--	--
c13034_g1	271	--	--	--	--	--	--	--	--	--	--	--	--	--	--	--	--	--	--	--	--	--	--	--	--	--	--	--	--
c34370_g1	513	--	--	--	--	--	--	--	--	--	--	--	--	--	--	--	--	--	--	--	--	--	--	--	--	--	--	--	--
c83802_g1	543	357617726	EHJ70960.1	177	5.20608e-12	hypothetical protein KGM_07112 [Danaus plexippus]	--	--	--	--	--	--	--	--	--	--	--	--	--	PF02862	DDHD domain	--	--	GO:0046872	metal ion binding	--	--	--	--
c71462_g1	331	--	--	--	--	--	--	--	--	--	--	--	--	--	--	--	--	--	--	--	--	--	--	--	--	--	--	--	--
c64585_g1	218	--	--	--	--	--	--	--	--	--	--	--	--	--	--	--	--	--	--	--	--	--	--	--	--	--	--	--	--
c80694_g1	312	--	--	--	--	--	--	--	--	--	--	--	--	--	--	--	--	--	--	--	--	--	--	--	--	--	--	--	--
c83208_g1	231	--	--	--	--	--	--	--	--	--	--	--	--	--	--	--	--	--	--	--	--	--	--	--	--	--	--	--	--
c81634_g1	220	--	--	--	--	--	--	--	--	--	--	--	--	--	--	--	--	--	--	--	--	--	--	--	--	--	--	--	--
c20844_g1	306	--	--	--	--	--	--	--	--	--	--	--	--	--	--	--	--	--	--	--	--	--	--	--	--	--	--	--	--
c27413_g1	333	--	--	--	--	--	--	--	--	--	--	--	--	--	--	--	--	--	--	--	--	--	--	--	--	--	--	--	--
c52173_g1	3401	357604963	EHJ64400.1	453	1.65095e-42	transcriptional regulator ATRX [Danaus plexippus]	--	--	--	--	--	--	--	--	--	--	--	--	--	--	--	--	--	GO:0097159//GO:1901363	organic cyclic compound binding//heterocyclic compound binding	--	--	--	--
c76201_g1	312	--	--	--	--	--	--	--	--	--	--	--	--	--	--	--	--	--	--	--	--	--	--	--	--	--	--	--	--
c9299_g1	293	--	--	--	--	--	--	--	--	--	--	--	--	--	--	--	--	--	--	--	--	--	--	--	--	--	--	--	--
c84226_g1	398	662209120	XP_008478147.1	298	1.48262e-28	PREDICTED: uncharacterized protein LOC103515006, partial [Diaphorina citri]	--	--	--	--	--	--	--	--	--	--	--	--	--	PF00078	Reverse transcriptase (RNA-dependent DNA polymerase)	GO:0006278	RNA-dependent DNA replication	GO:0003723//GO:0003964	RNA binding//RNA-directed DNA polymerase activity	--	--	--	--
c70578_g1	321	--	--	--	--	--	--	--	--	--	--	--	--	--	--	--	--	--	--	--	--	--	--	--	--	--	--	--	--
c68722_g1	262	--	--	--	--	--	--	--	--	--	--	--	--	--	--	--	--	--	--	--	--	--	--	--	--	--	--	--	--
c61111_g1	301	--	--	--	--	--	--	--	--	--	--	--	--	--	--	--	--	--	--	--	--	--	--	--	--	--	--	--	--
c83989_g1	249	--	--	--	--	--	--	--	--	--	--	--	--	--	--	--	--	--	--	--	--	--	--	--	--	--	--	--	--
c69793_g1	426	--	--	--	--	--	--	--	--	--	--	--	--	--	--	--	--	--	--	--	--	--	--	--	--	--	--	--	--
c63708_g1	305	--	--	--	--	--	--	--	--	--	--	--	--	--	--	--	--	--	--	--	--	--	--	--	--	--	--	--	--
c86408_g1	299	--	--	--	--	--	317137774	XM_001727892.2	263	6.20276e-134	Aspergillus oryzae RIB40 cellular nucleic acid-binding protein, mRNA	--	--	--	--	--	--	--	--	--	--	--	--	--	--	--	--	--	--
c82419_g1	265	--	--	--	--	--	--	--	--	--	--	--	--	--	--	--	--	--	--	--	--	--	--	--	--	--	--	--	--
c50118_g1	5580	357629704	EHJ78322.1	1313	1.0593e-162	hypothetical protein KGM_03925 [Danaus plexippus]	195586822	XM_002083131.1	173	1.38608e-82	Drosophila simulans GD13499 (Dsim\GD13499), mRNA	--	--	--	--	Q9W0K7	757	2.24589e-81	Protein bric-a-brac 1 OS=Drosophila melanogaster GN=bab1 PE=2 SV=2	PF00651//PF01527//PF00335//PF05225	BTB/POZ domain//Transposase//Tetraspanin family//helix-turn-helix, Psq domain	GO:0006313	transposition, DNA-mediated	GO:0004803//GO:0003677//GO:0005515	transposase activity//DNA binding//protein binding	GO:0016021	integral component of membrane	KOG4441	Proteins containing BTB/POZ and Kelch domains, involved in regulatory/signal transduction processes
c17398_g1	213	--	--	--	--	--	--	--	--	--	--	--	--	--	--	--	--	--	--	--	--	--	--	--	--	--	--	--	--
c35564_g1	717	--	--	--	--	--	--	--	--	--	--	--	--	--	--	--	--	--	--	--	--	--	--	--	--	--	--	--	--
c75536_g1	268	--	--	--	--	--	--	--	--	--	--	--	--	--	--	--	--	--	--	--	--	--	--	--	--	--	--	--	--
c48892_g1	1178	512935908	XP_004933390.1	1011	2.22721e-133	PREDICTED: uncharacterized protein LOC101742664 [Bombyx mori]	--	--	--	--	--	--	--	--	--	--	--	--	--	PF02038//PF03188	ATP1G1/PLM/MAT8 family//Eukaryotic cytochrome b561	GO:0006811	ion transport	GO:0005216	ion channel activity	GO:0016021//GO:0016020	integral component of membrane//membrane	--	--
c27609_g1	833	--	--	--	--	--	--	--	--	--	--	--	--	--	--	--	--	--	--	--	--	--	--	--	--	--	--	--	--
c56175_g1	300	--	--	--	--	--	--	--	--	--	--	--	--	--	--	--	--	--	--	--	--	--	--	--	--	--	--	--	--
c67279_g1	388	--	--	--	--	--	--	--	--	--	--	--	--	--	--	--	--	--	--	--	--	--	--	--	--	--	--	--	--
c14246_g1	458	--	--	--	--	--	--	--	--	--	--	--	--	--	--	--	--	--	--	PF05531//PF04548	Nucleopolyhedrovirus P10 protein//AIG1 family	--	--	GO:0005525	GTP binding	GO:0019028	viral capsid	--	--
c33949_g1	344	--	--	--	--	--	--	--	--	--	--	--	--	--	--	--	--	--	--	--	--	--	--	--	--	--	--	--	--
c73724_g1	283	238486336	XP_002374406.1	125	2.30534e-06	calcium ion transporter Vcx1, putative [Aspergillus flavus NRRL3357] >gi|317144321|ref|XP_001820040.2| vacuolar calcium ion transporter [Aspergillus oryzae RIB40] >gi|220699285|gb|EED55624.1| calcium ion transporter Vcx1, putative [Aspergillus flavus NRRL3357] >gi|391872710|gb|EIT81811.1| Ca2+/H+ antiporter VCX1 [Aspergillus oryzae 3.042] >gi|635507308|gb|KDE79322.1| Ca2+/H+ antiporter VCX1 [Aspe…	317144320	XM_001819988.2	225	7.79137e-113	Aspergillus oryzae RIB40 vacuolar calcium ion transporter, mRNA	--	--	--	--	--	--	--	--	--	--	--	--	--	--	--	--	--	--
c37723_g1	2936	49659474	BAD27263.1	2937	0	transferrin [Chilo suppressalis]	159543	M62802.1	497	0	Manduca sexta transferrin gene, complete cds	--	--	--	--	P22297	2884	0	Transferrin OS=Manduca sexta PE=1 SV=1	PF01127//PF01213//PF00405	Succinate dehydrogenase/Fumarate reductase transmembrane subunit//Adenylate cyclase associated (CAP) N terminal//Transferrin	GO:0006879//GO:0006826//GO:0007010	cellular iron ion homeostasis//iron ion transport//cytoskeleton organization	GO:0003779//GO:0016627//GO:0008199	actin binding//oxidoreductase activity, acting on the CH-CH group of donors//ferric iron binding	GO:0005576	extracellular region	KOG0449	Succinate dehydrogenase, cytochrome b subunit
c44870_g1	1784	512932820	XP_004932638.1	852	9.21321e-107	PREDICTED: uncharacterized protein LOC101743519 [Bombyx mori]	--	--	--	--	--	--	--	--	--	--	--	--	--	--	--	--	--	--	--	--	--	--	--
c83994_g1	1308	270015520	EFA11968.1	557	7.57603e-59	hypothetical protein TcasGA2_TC004049 [Tribolium castaneum]	--	--	--	--	--	--	--	--	--	Q8I7P9	274	2.23069e-24	Retrovirus-related Pol polyprotein from transposon opus OS=Drosophila melanogaster GN=pol PE=4 SV=1	PF00098//PF00078	Zinc knuckle//Reverse transcriptase (RNA-dependent DNA polymerase)	GO:0006278	RNA-dependent DNA replication	GO:0003676//GO:0008270//GO:0003723//GO:0003964	nucleic acid binding//zinc ion binding//RNA binding//RNA-directed DNA polymerase activity	--	--	KOG0017	FOG: Transposon-encoded proteins with TYA, reverse transcriptase, integrase domains in various combinations
c23781_g1	465	642939634	XP_008200958.1	170	6.79363e-13	PREDICTED: putative nuclease HARBI1 [Tribolium castaneum]	--	--	--	--	--	--	--	--	--	--	--	--	--	--	--	--	--	--	--	--	--	--	--
c76675_g1	204	--	--	--	--	--	--	--	--	--	--	--	--	--	--	--	--	--	--	--	--	--	--	--	--	--	--	--	--
c54422_g2	1348	512937112	XP_004933687.1	1071	2.72928e-130	PREDICTED: uncharacterized protein LOC101736300, partial [Bombyx mori]	261857392	FP565803.1	124	5.69927e-56	H.numata DNA sequence from clone AEHN-7C9, complete sequence	K17480	AATK, LMTK1	lemur tyrosine kinase 1	http://www.genome.jp/dbget-bin/www_bget?ko:K17480	Q6ZMQ8	263	7.43103e-23	Serine/threonine-protein kinase LMTK1 OS=Homo sapiens GN=AATK PE=1 SV=2	PF06495//PF00069//PF07714	Fruit fly transformer protein//Protein kinase domain//Protein tyrosine kinase	GO:0006468//GO:0006397//GO:0046660	protein phosphorylation//mRNA processing//female sex differentiation	GO:0004672//GO:0005524	protein kinase activity//ATP binding	GO:0005634	nucleus	KOG0194	Protein tyrosine kinase
c47608_g3	539	--	--	--	--	--	--	--	--	--	--	--	--	--	--	--	--	--	--	PF04517	Microvirus lysis protein (E), C terminus	GO:0019054	modulation by virus of host process	GO:0004857	enzyme inhibitor activity	--	--	--	--
c233_g1	254	--	--	--	--	--	--	--	--	--	--	--	--	--	--	--	--	--	--	PF02416	mttA/Hcf106 family	GO:0015031	protein transport	GO:0008565	protein transporter activity	--	--	--	--
c39758_g1	557	--	--	--	--	--	--	--	--	--	--	--	--	--	--	--	--	--	--	--	--	--	--	--	--	--	--	--	--
c77388_g1	349	--	--	--	--	--	--	--	--	--	--	--	--	--	--	--	--	--	--	--	--	--	--	--	--	--	--	--	--
c86539_g1	211	--	--	--	--	--	--	--	--	--	--	--	--	--	--	--	--	--	--	--	--	--	--	--	--	--	--	--	--
c88770_g1	239	--	--	--	--	--	--	--	--	--	--	--	--	--	--	--	--	--	--	--	--	--	--	--	--	--	--	--	--
c48516_g2	1176	--	--	--	--	--	--	--	--	--	--	--	--	--	--	--	--	--	--	PF02892	BED zinc finger	--	--	GO:0003677	DNA binding	--	--	--	--
c62037_g1	349	--	--	--	--	--	--	--	--	--	--	--	--	--	--	--	--	--	--	--	--	--	--	--	--	--	--	--	--
c21142_g1	478	512905072	XP_004925854.1	177	1.8564e-12	PREDICTED: putative inorganic phosphate cotransporter-like [Bombyx mori]	--	--	--	--	--	--	--	--	--	--	--	--	--	--	--	--	--	--	--	--	--	--	--
c43257_g1	1951	357614853	EHJ69326.1	1531	0	hypothetical protein KGM_10899 [Danaus plexippus]	--	--	--	--	--	--	--	--	--	--	--	--	--	--	--	--	--	--	--	--	--	--	--
c82207_g1	221	--	--	--	--	--	--	--	--	--	--	--	--	--	--	--	--	--	--	--	--	--	--	--	--	--	--	--	--
c61885_g1	229	675378837	KFM71739.1	177	3.07661e-13	hypothetical protein X975_17934, partial [Stegodyphus mimosarum]	--	--	--	--	--	--	--	--	--	--	--	--	--	--	--	--	--	--	--	--	--	--	--
c60006_g1	252	--	--	--	--	--	--	--	--	--	--	--	--	--	--	--	--	--	--	--	--	--	--	--	--	--	--	--	--
c11963_g1	205	--	--	--	--	--	--	--	--	--	--	--	--	--	--	--	--	--	--	--	--	--	--	--	--	--	--	--	--
c7672_g1	1716	54039568	Q8WQI5.1	1068	3.45735e-140	RecName: Full=40S ribosomal protein S8 [Spodoptera frugiperda] >gi|18253055|gb|AAL62472.1| ribosomal protein S8 [Spodoptera frugiperda]	268306411	GU084294.1	357	0	Manduca sexta ribosomal protein S8 (rps8) mRNA, complete cds	K02995	RP-S8e, RPS8	small subunit ribosomal protein S8e	http://www.genome.jp/dbget-bin/www_bget?ko:K02995	Q8WQI5	1068	1.03573e-141	40S ribosomal protein S8 OS=Spodoptera frugiperda GN=RpS8 PE=2 SV=1	--	--	GO:0042254//GO:0006412	ribosome biogenesis//translation	GO:0003735	structural constituent of ribosome	GO:0005840	ribosome	KOG3283	40S ribosomal protein S8
c11662_g1	207	--	--	--	--	--	--	--	--	--	--	--	--	--	--	--	--	--	--	--	--	--	--	--	--	--	--	--	--
c79201_g1	219	238498792	XP_002380631.1	248	2.41722e-23	A kinase anchor protein, putative [Aspergillus flavus NRRL3357] >gi|220693905|gb|EED50250.1| A kinase anchor protein, putative [Aspergillus flavus NRRL3357]	317155892	XM_003190612.1	195	2.75861e-96	Aspergillus oryzae RIB40 FYVE zinc finger protein, mRNA	--	--	--	--	--	--	--	--	--	--	GO:0016310	phosphorylation	GO:0046872//GO:0016301//GO:0008270	metal ion binding//kinase activity//zinc ion binding	--	--	--	--
c68967_g1	264	--	--	--	--	--	--	--	--	--	--	--	--	--	--	--	--	--	--	--	--	--	--	--	--	--	--	--	--
c8297_g1	552	512915562	XP_004928419.1	205	7.2163e-16	PREDICTED: uncharacterized protein LOC101746992 [Bombyx mori]	--	--	--	--	--	--	--	--	--	--	--	--	--	--	--	--	--	--	--	--	--	--	--
c12142_g1	248	--	--	--	--	--	--	--	--	--	--	--	--	--	--	--	--	--	--	--	--	--	--	--	--	--	--	--	--
c48034_g2	245	--	--	--	--	--	--	--	--	--	--	--	--	--	--	--	--	--	--	--	--	--	--	--	--	--	--	--	--
c54031_g1	804	--	--	--	--	--	--	--	--	--	--	--	--	--	--	--	--	--	--	--	--	--	--	--	--	--	--	--	--
c64874_g1	221	--	--	--	--	--	--	--	--	--	--	--	--	--	--	--	--	--	--	--	--	--	--	--	--	--	--	--	--
c42491_g1	592	--	--	--	--	--	--	--	--	--	--	--	--	--	--	--	--	--	--	--	--	--	--	--	--	--	--	--	--
c78780_g1	474	--	--	--	--	--	--	--	--	--	--	--	--	--	--	--	--	--	--	--	--	--	--	--	--	--	--	--	--
c80492_g1	405	--	--	--	--	--	--	--	--	--	--	--	--	--	--	--	--	--	--	--	--	--	--	--	--	--	--	--	--
c78068_g1	204	--	--	--	--	--	--	--	--	--	--	--	--	--	--	--	--	--	--	--	--	--	--	--	--	--	--	--	--
c84934_g1	395	557729351	GAD92106.1	669	8.50109e-84	alcohol dehydrogenase [Byssochlamys spectabilis No. 5]	--	--	--	--	--	K18369	adh2	alcohol dehydrogenase	http://www.genome.jp/dbget-bin/www_bget?ko:K18369	P47734	324	6.47699e-35	S-(hydroxymethyl)glutathione dehydrogenase OS=Methylobacter marinus GN=fdh PE=3 SV=2	PF08240	Alcohol dehydrogenase GroES-like domain	GO:0055114	oxidation-reduction process	GO:0016491	oxidoreductase activity	--	--	KOG0024	Sorbitol dehydrogenase
c5263_g1	270	--	--	--	--	--	--	--	--	--	--	--	--	--	--	--	--	--	--	--	--	--	--	--	--	--	--	--	--
c769_g1	454	--	--	--	--	--	--	--	--	--	--	--	--	--	--	--	--	--	--	--	--	--	--	--	--	--	--	--	--
c81406_g1	273	--	--	--	--	--	293628517	GQ225749.1	264	1.56306e-134	Ostrinia nubilalis clone BAC 57P12 acyl-CoA desaturase Z9-1 gene, complete cds	--	--	--	--	--	--	--	--	--	--	--	--	--	--	--	--	--	--
c78876_g1	256	357631827	EHJ79294.1	391	1.37393e-44	hypothetical protein KGM_15517 [Danaus plexippus]	--	--	--	--	--	--	--	--	--	--	--	--	--	PF09150	Orange carotenoid protein, N-terminal	GO:0016037	light absorption	GO:0031404	chloride ion binding	GO:0030089	phycobilisome	--	--
c59548_g1	246	--	--	--	--	--	--	--	--	--	--	--	--	--	--	--	--	--	--	--	--	--	--	--	--	--	--	--	--
c29286_g1	1210	--	--	--	--	--	--	--	--	--	--	--	--	--	--	--	--	--	--	--	--	--	--	--	--	--	--	--	--
c60173_g1	275	--	--	--	--	--	--	--	--	--	--	--	--	--	--	--	--	--	--	--	--	--	--	--	--	--	--	--	--
c43186_g1	3134	--	--	--	--	--	--	--	--	--	--	--	--	--	--	--	--	--	--	--	--	--	--	--	--	--	--	--	--
c9740_g1	207	--	--	--	--	--	--	--	--	--	--	--	--	--	--	--	--	--	--	--	--	--	--	--	--	--	--	--	--
c61747_g1	384	--	--	--	--	--	--	--	--	--	--	--	--	--	--	--	--	--	--	--	--	--	--	--	--	--	--	--	--
c75398_g1	225	--	--	--	--	--	--	--	--	--	--	--	--	--	--	--	--	--	--	--	--	--	--	--	--	--	--	--	--
c74168_g1	224	--	--	--	--	--	--	--	--	--	--	--	--	--	--	--	--	--	--	--	--	--	--	--	--	--	--	--	--
c29882_g1	586	--	--	--	--	--	--	--	--	--	--	--	--	--	--	--	--	--	--	--	--	--	--	--	--	--	--	--	--
c48262_g1	1943	339283876	AEJ38207.1	1499	0	antennal esterase CXE10 [Spodoptera exigua]	--	--	--	--	--	K01049	ACHE	acetylcholinesterase	http://www.genome.jp/dbget-bin/www_bget?ko:K01049	P35502	635	5.10968e-72	Esterase FE4 OS=Myzus persicae PE=1 SV=1	PF07859//PF00326	alpha/beta hydrolase fold//Prolyl oligopeptidase family	GO:0006508//GO:0008152	proteolysis//metabolic process	GO:0008236//GO:0016787	serine-type peptidase activity//hydrolase activity	--	--	KOG1516	Carboxylesterase and related proteins
c907_g1	208	--	--	--	--	--	--	--	--	--	--	--	--	--	--	--	--	--	--	--	--	--	--	--	--	--	--	--	--
c13533_g1	285	--	--	--	--	--	--	--	--	--	--	--	--	--	--	--	--	--	--	--	--	--	--	--	--	--	--	--	--
c39398_g1	482	--	--	--	--	--	--	--	--	--	--	--	--	--	--	--	--	--	--	--	--	--	--	--	--	--	--	--	--
c45767_g1	233	--	--	--	--	--	--	--	--	--	--	--	--	--	--	--	--	--	--	--	--	--	--	--	--	--	--	--	--
c15558_g1	255	--	--	--	--	--	--	--	--	--	--	--	--	--	--	--	--	--	--	--	--	--	--	--	--	--	--	--	--
c52903_g3	2449	357619165	EHJ71842.1	2033	0	putative heat shock protein 70 HSP70 interacting protein [Danaus plexippus]	--	--	--	--	--	--	--	--	--	Q9DBA6	394	8.29935e-39	Peroxisomal leader peptide-processing protease OS=Mus musculus GN=Tysnd1 PE=1 SV=1	PF03510//PF00089	2C endopeptidase (C24) cysteine protease family//Trypsin	GO:0008152//GO:0006950//GO:0006508	metabolic process//response to stress//proteolysis	GO:0004197//GO:0004252//GO:0003824	cysteine-type endopeptidase activity//serine-type endopeptidase activity//catalytic activity	--	--	--	--
c56493_g1	320	357603982	EHJ63990.1	230	3.83935e-21	hypothetical protein KGM_03563 [Danaus plexippus]	--	--	--	--	--	--	--	--	--	--	--	--	--	--	--	--	--	--	--	--	--	--	--
c49525_g1	233	--	--	--	--	--	--	--	--	--	--	--	--	--	--	--	--	--	--	--	--	--	--	--	--	--	--	--	--
c31860_g1	768	--	--	--	--	--	--	--	--	--	--	--	--	--	--	--	--	--	--	--	--	--	--	--	--	--	--	--	--
c64042_g1	313	--	--	--	--	--	--	--	--	--	--	--	--	--	--	--	--	--	--	--	--	--	--	--	--	--	--	--	--
c57927_g1	208	--	--	--	--	--	--	--	--	--	--	--	--	--	--	--	--	--	--	--	--	--	--	--	--	--	--	--	--
c79765_g1	244	--	--	--	--	--	--	--	--	--	--	--	--	--	--	--	--	--	--	--	--	--	--	--	--	--	--	--	--
c75105_g1	487	--	--	--	--	--	--	--	--	--	--	--	--	--	--	--	--	--	--	--	--	--	--	--	--	--	--	--	--
c35026_g1	529	--	--	--	--	--	--	--	--	--	--	--	--	--	--	--	--	--	--	--	--	--	--	--	--	--	--	--	--
c50819_g3	219	--	--	--	--	--	--	--	--	--	--	--	--	--	--	--	--	--	--	--	--	--	--	--	--	--	--	--	--
c85140_g1	254	--	--	--	--	--	--	--	--	--	--	--	--	--	--	--	--	--	--	--	--	--	--	--	--	--	--	--	--
c69844_g1	252	--	--	--	--	--	--	--	--	--	--	--	--	--	--	--	--	--	--	--	--	--	--	--	--	--	--	--	--
c15591_g1	215	--	--	--	--	--	--	--	--	--	--	--	--	--	--	--	--	--	--	--	--	--	--	--	--	--	--	--	--
c81795_g1	266	--	--	--	--	--	--	--	--	--	--	--	--	--	--	--	--	--	--	--	--	--	--	--	--	--	--	--	--
c63215_g1	274	--	--	--	--	--	--	--	--	--	--	--	--	--	--	--	--	--	--	--	--	--	--	--	--	--	--	--	--
c57440_g1	603	--	--	--	--	--	--	--	--	--	--	--	--	--	--	--	--	--	--	--	--	--	--	--	--	--	--	--	--
c65889_g1	299	--	--	--	--	--	--	--	--	--	--	--	--	--	--	--	--	--	--	--	--	--	--	--	--	--	--	--	--
c84536_g1	330	--	--	--	--	--	--	--	--	--	--	--	--	--	--	--	--	--	--	--	--	--	--	--	--	--	--	--	--
c59552_g1	303	--	--	--	--	--	--	--	--	--	--	--	--	--	--	--	--	--	--	--	--	--	--	--	--	--	--	--	--
c47082_g1	1917	512920741	XP_004929708.1	1462	0	PREDICTED: protein prenyltransferase alpha subunit repeat-containing protein 1-like [Bombyx mori]	--	--	--	--	--	--	--	--	--	A1L3L1	376	9.07867e-38	Protein prenyltransferase alpha subunit repeat-containing protein 1-B (Fragment) OS=Xenopus laevis GN=ptar1-b PE=2 SV=1	PF01239	Protein prenyltransferase alpha subunit repeat	GO:0018342	protein prenylation	GO:0008318	protein prenyltransferase activity	--	--	KOG0529	Protein geranylgeranyltransferase type II, alpha subunit
c58819_g1	226	--	--	--	--	--	--	--	--	--	--	--	--	--	--	--	--	--	--	--	--	--	--	--	--	--	--	--	--
c46000_g1	1469	357620814	EHJ72863.1	1232	1.18985e-164	cytochrome c1 [Danaus plexippus]	389611640	AK402831.1	453	0	Papilio xuthus mRNA for cytochrome C1, partial cds, sequence id: Px-0527, expressed in epidermis	K00413	CYC1, CYT1, petC	ubiquinol-cytochrome c reductase cytochrome c1 subunit	http://www.genome.jp/dbget-bin/www_bget?ko:K00413	P00125	694	3.81619e-85	Cytochrome c1, heme protein, mitochondrial OS=Bos taurus GN=CYC1 PE=1 SV=2	PF13442//PF00034//PF02167	Cytochrome C oxidase, cbb3-type, subunit III//Cytochrome c//Cytochrome C1 family	GO:0006118	electron transport	GO:0005506//GO:0020037//GO:0009055	iron ion binding//heme binding//electron carrier activity	--	--	KOG3052	Cytochrome c1
c22472_g1	417	--	--	--	--	--	--	--	--	--	--	--	--	--	--	--	--	--	--	--	--	--	--	--	--	--	--	--	--
c87273_g1	222	--	--	--	--	--	--	--	--	--	--	--	--	--	--	--	--	--	--	--	--	--	--	--	--	--	--	--	--
c84532_g1	327	169765047	XP_001816995.1	576	3.46658e-69	malate synthase, glyoxysomal [Aspergillus oryzae RIB40] >gi|238503668|ref|XP_002383066.1| malate synthase AcuE [Aspergillus flavus NRRL3357] >gi|83764849|dbj|BAE54993.1| unnamed protein product [Aspergillus oryzae RIB40] >gi|220690537|gb|EED46886.1| malate synthase AcuE [Aspergillus flavus NRRL3357] >gi|391863283|gb|EIT72594.1| malate synthase [Aspergillus oryzae 3.042] >gi|635505495|gb|KDE77560.…	317138564	XM_001816943.2	285	4.03941e-146	Aspergillus oryzae RIB40 malate synthase, glyoxysomal, mRNA	K01638	E2.3.3.9, aceB, glcB	malate synthase	http://www.genome.jp/dbget-bin/www_bget?ko:K01638	P28344	542	1.02345e-65	Malate synthase, glyoxysomal OS=Emericella nidulans (strain FGSC A4 / ATCC 38163 / CBS 112.46 / NRRL 194 / M139) GN=acuE PE=3 SV=3	PF01274	Malate synthase	GO:0006099//GO:0006097//GO:0006090	tricarboxylic acid cycle//glyoxylate cycle//pyruvate metabolic process	GO:0004474	malate synthase activity	GO:0005737	cytoplasm	KOG1261	Malate synthase
c82832_g1	302	--	--	--	--	--	--	--	--	--	--	--	--	--	--	--	--	--	--	--	--	--	--	--	--	--	--	--	--
c1803_g1	1062	3372756	AAC61264.1	266	1.42876e-22	soluble guanylyl cyclase beta-1 subunit [Manduca sexta]	3372755	AF062751.1	76	2.14916e-29	Manduca sexta soluble guanylyl cyclase beta-1 subunit mRNA, complete cds	K12319	GUCY1B	guanylate cyclase soluble subunit beta	http://www.genome.jp/dbget-bin/www_bget?ko:K12319	Q02153	164	4.13446e-11	Guanylate cyclase soluble subunit beta-1 OS=Homo sapiens GN=GUCY1B3 PE=1 SV=1	PF00211	Adenylate and Guanylate cyclase catalytic domain	GO:0035556//GO:0006182//GO:0046039//GO:0009190//GO:0006144	intracellular signal transduction//cGMP biosynthetic process//GTP metabolic process//cyclic nucleotide biosynthetic process//purine nucleobase metabolic process	GO:0020037//GO:0004383//GO:0000166//GO:0016849	heme binding//guanylate cyclase activity//nucleotide binding//phosphorus-oxygen lyase activity	GO:0005622	intracellular	--	--
c82038_g1	217	--	--	--	--	--	--	--	--	--	--	--	--	--	--	--	--	--	--	--	--	--	--	--	--	--	--	--	--
c48542_g1	754	357617454	EHJ70801.1	444	5.36936e-49	hypothetical protein KGM_14539 [Danaus plexippus]	--	--	--	--	--	--	--	--	--	--	--	--	--	--	--	--	--	--	--	--	--	--	--
c22191_g1	785	--	--	--	--	--	--	--	--	--	--	--	--	--	--	--	--	--	--	PF10018	Vitamin-D-receptor interacting Mediator subunit 4	GO:0006357	regulation of transcription from RNA polymerase II promoter	GO:0001104	RNA polymerase II transcription cofactor activity	GO:0016592	mediator complex	--	--
c61129_g1	246	--	--	--	--	--	--	--	--	--	--	--	--	--	--	--	--	--	--	--	--	--	--	--	--	--	--	--	--
c25604_g1	2057	357609804	EHJ66688.1	1074	1.12508e-137	gamma-soluble nsf attachment protein [Danaus plexippus]	--	--	--	--	--	--	--	--	--	P81127	446	5.09184e-48	Gamma-soluble NSF attachment protein OS=Bos taurus GN=NAPG PE=1 SV=3	PF02071//PF08533	Aromatic-di-Alanine (AdAR) repeat//Beta-galactosidase C-terminal domain	GO:0046486//GO:0006012//GO:0006886//GO:0006687//GO:0006027	glycerolipid metabolic process//galactose metabolic process//intracellular protein transport//glycosphingolipid metabolic process//glycosaminoglycan catabolic process	GO:0004565	beta-galactosidase activity	GO:0009341	beta-galactosidase complex	--	--
c33087_g1	377	--	--	--	--	--	--	--	--	--	--	--	--	--	--	--	--	--	--	--	--	--	--	--	--	--	--	--	--
c85443_g1	210	--	--	--	--	--	--	--	--	--	--	--	--	--	--	--	--	--	--	--	--	--	--	--	--	--	--	--	--
c80902_g1	203	--	--	--	--	--	--	--	--	--	--	--	--	--	--	--	--	--	--	--	--	--	--	--	--	--	--	--	--
c88016_g1	326	357626936	EHJ76823.1	262	1.83244e-27	hypothetical protein KGM_07748 [Danaus plexippus]	--	--	--	--	--	--	--	--	--	--	--	--	--	--	--	--	--	--	--	--	--	--	--
c36754_g1	282	--	--	--	--	--	--	--	--	--	--	--	--	--	--	--	--	--	--	PF03148	Tektin family	GO:0000226	microtubule cytoskeleton organization	--	--	GO:0005874	microtubule	--	--
c44773_g1	642	512894853	XP_004923530.1	1056	6.43635e-142	PREDICTED: tubulin beta chain-like [Bombyx mori]	112420110	BT026927.1	258	8.52978e-131	Gasterosteus aculeatus clone CFW104-D01 mRNA sequence	K07375	TUBB	tubulin beta	http://www.genome.jp/dbget-bin/www_bget?ko:K07375	P41386	1042	2.17016e-141	Tubulin beta chain (Fragment) OS=Haliotis discus PE=2 SV=1	PF03953	Tubulin C-terminal domain	GO:0006184//GO:0051258	GTP catabolic process//protein polymerization	GO:0005525//GO:0003924	GTP binding//GTPase activity	GO:0043234	protein complex	KOG1375	Beta tubulin
c82777_g1	223	--	--	--	--	--	--	--	--	--	--	--	--	--	--	--	--	--	--	--	--	--	--	--	--	--	--	--	--
c4335_g1	234	--	--	--	--	--	--	--	--	--	--	--	--	--	--	--	--	--	--	--	--	--	--	--	--	--	--	--	--
c78722_g1	513	--	--	--	--	--	--	--	--	--	--	--	--	--	--	--	--	--	--	--	--	--	--	--	--	--	--	--	--
c48955_g1	1960	512902940	XP_004925497.1	2046	0	PREDICTED: uncharacterized protein LOC101743882 [Bombyx mori]	--	--	--	--	--	--	--	--	--	Q0VFN8	277	2.07719e-24	Uncharacterized protein C9orf117 homolog OS=Xenopus tropicalis PE=2 SV=1	PF05531//PF04977	Nucleopolyhedrovirus P10 protein//Septum formation initiator	GO:0007049	cell cycle	--	--	GO:0019028	viral capsid	--	--
c53270_g2	2557	357622304	EHJ73837.1	1440	0	protein SHQ1-like protein [Danaus plexippus]	--	--	--	--	--	K14764	SHQ1	protein SHQ1	http://www.genome.jp/dbget-bin/www_bget?ko:K14764	Q05B18	736	2.43622e-84	Protein SHQ1 homolog OS=Xenopus tropicalis GN=shq1 PE=2 SV=1	PF04889	Cwf15/Cwc15 cell cycle control protein	GO:0000398	mRNA splicing, via spliceosome	--	--	GO:0005681	spliceosomal complex	KOG3247	Uncharacterized conserved protein
c79388_g1	307	--	--	--	--	--	--	--	--	--	--	--	--	--	--	--	--	--	--	--	--	--	--	--	--	--	--	--	--
c14871_g1	444	--	--	--	--	--	--	--	--	--	--	--	--	--	--	--	--	--	--	--	--	--	--	--	--	--	--	--	--
c31396_g1	502	357613748	EHJ68701.1	200	3.04978e-15	hypothetical protein KGM_02838 [Danaus plexippus]	--	--	--	--	--	--	--	--	--	--	--	--	--	--	--	GO:0055085//GO:0006811	transmembrane transport//ion transport	GO:0005216	ion channel activity	GO:0016021	integral component of membrane	--	--
c18154_g1	261	--	--	--	--	--	--	--	--	--	--	--	--	--	--	--	--	--	--	--	--	--	--	--	--	--	--	--	--
c7124_g1	243	--	--	--	--	--	--	--	--	--	--	--	--	--	--	--	--	--	--	--	--	--	--	--	--	--	--	--	--
c45176_g1	4296	4239843	BAA74713.1	2438	0	Yokozuna [Bombyx mori]	--	--	--	--	--	--	--	--	--	P10978	1500	0	Retrovirus-related Pol polyprotein from transposon TNT 1-94 OS=Nicotiana tabacum PE=2 SV=1	PF03788//PF00098//PF00078//PF00665	LrgA family//Zinc knuckle//Reverse transcriptase (RNA-dependent DNA polymerase)//Integrase core domain	GO:0006278//GO:0015074	RNA-dependent DNA replication//DNA integration	GO:0008270//GO:0005488//GO:0003964//GO:0003676//GO:0003723	zinc ion binding//binding//RNA-directed DNA polymerase activity//nucleic acid binding//RNA binding	GO:0016021	integral component of membrane	KOG0017	FOG: Transposon-encoded proteins with TYA, reverse transcriptase, integrase domains in various combinations
c61240_g1	301	--	--	--	--	--	--	--	--	--	--	--	--	--	--	--	--	--	--	--	--	--	--	--	--	--	--	--	--
c43800_g1	1405	--	--	--	--	--	--	--	--	--	--	--	--	--	--	--	--	--	--	PF06466	PCAF (P300/CBP-associated factor) N-terminal domain	GO:0042967//GO:0006355	acyl-carrier-protein biosynthetic process//regulation of transcription, DNA-templated	GO:0004402	histone acetyltransferase activity	GO:0000123//GO:0005634	histone acetyltransferase complex//nucleus	--	--
c48736_g1	4026	669296912	AII21996.1	4378	0	aldehyde oxidase AOX1 [Sesamia inferens]	--	--	--	--	--	--	--	--	--	Q7G192	1369	2.04615e-163	Indole-3-acetaldehyde oxidase OS=Arabidopsis thaliana GN=AAO2 PE=1 SV=2	PF02738//PF01799//PF00941//PF00111	Molybdopterin-binding domain of aldehyde dehydrogenase//[2Fe-2S] binding domain//FAD binding domain in molybdopterin dehydrogenase//2Fe-2S iron-sulfur cluster binding domain	GO:0006118//GO:0055114	electron transport//oxidation-reduction process	GO:0009055//GO:0046872//GO:0016491//GO:0051536	electron carrier activity//metal ion binding//oxidoreductase activity//iron-sulfur cluster binding	--	--	KOG0430	Xanthine dehydrogenase
c57837_g1	216	--	--	--	--	--	--	--	--	--	--	--	--	--	--	--	--	--	--	--	--	--	--	--	--	--	--	--	--
c48351_g4	2635	675376737	KFM69639.1	1362	4.75475e-178	Zinc finger BED domain-containing protein 5, partial [Stegodyphus mimosarum]	--	--	--	--	--	--	--	--	--	A4IFA3	707	1.6249e-77	General transcription factor II-I repeat domain-containing protein 2 OS=Bos taurus GN=GTF2IRD2 PE=2 SV=1	PF05699	hAT family C-terminal dimerisation region	--	--	GO:0046983	protein dimerization activity	--	--	--	--
c88692_g1	214	--	--	--	--	--	--	--	--	--	--	--	--	--	--	--	--	--	--	--	--	--	--	--	--	--	--	--	--
c8968_g1	268	--	--	--	--	--	--	--	--	--	--	--	--	--	--	--	--	--	--	--	--	--	--	--	--	--	--	--	--
c27446_g1	258	--	--	--	--	--	--	--	--	--	--	--	--	--	--	--	--	--	--	--	--	--	--	--	--	--	--	--	--
c47467_g2	283	--	--	--	--	--	--	--	--	--	--	--	--	--	--	--	--	--	--	--	--	--	--	--	--	--	--	--	--
c49478_g1	2485	357626202	EHJ76373.1	2176	0	ku P80 DNA helicase [Danaus plexippus]	--	--	--	--	--	--	--	--	--	P27641	566	3.21979e-60	X-ray repair cross-complementing protein 5 OS=Mus musculus GN=Xrcc5 PE=2 SV=4	PF08785//PF01701//PF02735	Ku C terminal domain like//Photosystem I reaction centre subunit IX / PsaJ//Ku70/Ku80 beta-barrel domain	GO:0006303//GO:0015979	double-strand break repair via nonhomologous end joining//photosynthesis	GO:0004386//GO:0003677//GO:0016817	helicase activity//DNA binding//hydrolase activity, acting on acid anhydrides	GO:0009522	photosystem I	KOG2326	DNA-binding subunit of a DNA-dependent protein kinase (Ku80 autoantigen)
c36176_g1	313	--	--	--	--	--	--	--	--	--	--	--	--	--	--	--	--	--	--	--	--	--	--	--	--	--	--	--	--
c72583_g1	212	--	--	--	--	--	--	--	--	--	--	--	--	--	--	--	--	--	--	--	--	--	--	--	--	--	--	--	--
c54860_g1	2037	--	--	--	--	--	--	--	--	--	--	--	--	--	--	--	--	--	--	--	--	--	--	--	--	--	--	--	--
c58332_g1	212	--	--	--	--	--	--	--	--	--	--	--	--	--	--	--	--	--	--	--	--	--	--	--	--	--	--	--	--
c41010_g1	350	--	--	--	--	--	--	--	--	--	--	--	--	--	--	--	--	--	--	--	--	--	--	--	--	--	--	--	--
c39682_g1	577	--	--	--	--	--	--	--	--	--	--	--	--	--	--	--	--	--	--	--	--	--	--	--	--	--	--	--	--
c25782_g1	2772	357621014	EHJ73000.1	1042	7.25944e-131	cAMP responsive element binding protein [Danaus plexippus]	346707888	AK378180.1	118	2.56878e-52	Bombyx mori mRNA, clone: fmgV12B15	K05870	CREB1	cyclic AMP-responsive element-binding protein 1	http://www.genome.jp/dbget-bin/www_bget?ko:K05870	Q9VWW0	232	3.85965e-19	Cyclic AMP response element-binding protein B OS=Drosophila melanogaster GN=CrebB PE=1 SV=1	PF03131//PF07716//PF02173//PF00170	bZIP Maf transcription factor//Basic region leucine zipper//pKID domain//bZIP transcription factor	GO:0006355	regulation of transcription, DNA-templated	GO:0003700//GO:0005515//GO:0003677//GO:0043565	sequence-specific DNA binding transcription factor activity//protein binding//DNA binding//sequence-specific DNA binding	GO:0005634//GO:0005667	nucleus//transcription factor complex	KOG3584	cAMP response element binding protein and related transcription factors
c57715_g1	323	--	--	--	--	--	--	--	--	--	--	--	--	--	--	--	--	--	--	--	--	--	--	--	--	--	--	--	--
c59154_g1	363	512912259	XP_004927611.1	299	1.54898e-30	PREDICTED: uncharacterized protein LOC101738666 [Bombyx mori]	--	--	--	--	--	--	--	--	--	--	--	--	--	--	--	--	--	--	--	--	--	--	--
c54547_g1	2838	357626684	EHJ76688.1	1666	0	hypothetical protein KGM_11742 [Danaus plexippus]	--	--	--	--	--	--	--	--	--	Q5RAP2	225	7.42373e-18	Epsilon-sarcoglycan OS=Pongo abelii GN=SGCE PE=2 SV=1	PF05510	Sarcoglycan alpha/epsilon	--	--	GO:0005509	calcium ion binding	GO:0016012	sarcoglycan complex	KOG4482	Sarcoglycan complex, alpha/epsilon subunits
c82083_g1	214	--	--	--	--	--	--	--	--	--	--	--	--	--	--	--	--	--	--	--	--	--	--	--	--	--	--	--	--
c52309_g1	2055	357614604	EHJ69168.1	437	1.57931e-61	hypothetical protein KGM_15716 [Danaus plexippus]	--	--	--	--	--	--	--	--	--	--	--	--	--	PF00601//PF00565//PF03938//PF01496//PF05531//PF04977//PF02388//PF04111//PF07716//PF05615//PF06009//PF05355//PF04888//PF00170//PF02403//PF01576//PF10473	Influenza non-structural protein (NS2)//Staphylococcal nuclease homologue//Outer membrane protein (OmpH-like)//V-type ATPase 116kDa subunit family//Nucleopolyhedrovirus P10 protein//Septum formation initiator//FemAB family//Autophagy protein Apg6//Basic region leucine zipper//Tho complex subunit 7//Laminin Domain II//Apolipoprotein C-II//Secretion system effector C (SseC) like family//bZIP transc…	GO:0006869//GO:0006914//GO:0006434//GO:0009405//GO:0007155//GO:0007049//GO:0006566//GO:0006563//GO:0006405//GO:0015991//GO:0006629//GO:0015992//GO:0006397//GO:0006544//GO:0006355	lipid transport//autophagy//seryl-tRNA aminoacylation//pathogenesis//cell adhesion//cell cycle//threonine metabolic process//L-serine metabolic process//RNA export from nucleus//ATP hydrolysis coupled proton transport//lipid metabolic process//proton transport//mRNA processing//glycine metabolic process//regulation of transcription, DNA-templated	GO:0008047//GO:0045502//GO:0003700//GO:0043565//GO:0004828//GO:0003676//GO:0016788//GO:0005524//GO:0008134//GO:0042803//GO:0051082//GO:0003774//GO:0016755//GO:0015078//GO:0000166	enzyme activator activity//dynein binding//sequence-specific DNA binding transcription factor activity//sequence-specific DNA binding//serine-tRNA ligase activity//nucleic acid binding//hydrolase activity, acting on ester bonds//ATP binding//transcription factor binding//protein homodimerization activity//unfolded protein binding//motor activity//transferase activity, transferring amino-acyl grou…	GO:0000445//GO:0030286//GO:0016459//GO:0042627//GO:0019028//GO:0005667//GO:0033179//GO:0042025//GO:0005604//GO:0005737	THO complex part of transcription export complex//dynein complex//myosin complex//chylomicron//viral capsid//transcription factor complex//proton-transporting V-type ATPase, V0 domain//host cell nucleus//basement membrane//cytoplasm	--	--
c50100_g1	2796	530234043	NP_001268826.1	2416	0	uncharacterized protein LOC101738661 [Bombyx mori] >gi|378466248|gb|AFC01233.1| DnaJ-19 [Bombyx mori]	530234042	NM_001281897.1	892	0	Bombyx mori translocation protein SEC63 homolog (DnaJ-19), mRNA >gnl|BL_ORD_ID|14154974 Bombyx mori DnaJ-19 mRNA, complete cds	K09540	SEC63	translocation protein SEC63	http://www.genome.jp/dbget-bin/www_bget?ko:K09540	Q8VHE0	1226	6.08668e-153	Translocation protein SEC63 homolog OS=Mus musculus GN=Sec63 PE=2 SV=4	--	--	GO:0006457	protein folding	GO:0051082//GO:0031072	unfolded protein binding//heat shock protein binding	--	--	KOG4434	Molecular chaperone SEC63, endoplasmic reticulum translocon component
c58649_g1	226	--	--	--	--	--	--	--	--	--	--	--	--	--	--	--	--	--	--	--	--	--	--	--	--	--	--	--	--
c45233_g1	956	--	--	--	--	--	--	--	--	--	--	--	--	--	--	--	--	--	--	PF03811//PF03857	InsA N-terminal domain//Colicin immunity protein	GO:0030153//GO:0006313//GO:0006955	bacteriocin immunity//transposition, DNA-mediated//immune response	GO:0015643	toxic substance binding	GO:0019814	immunoglobulin complex	--	--
c44485_g2	821	512924318	XP_004930566.1	953	1.3993e-124	PREDICTED: cleavage stimulation factor subunit 2 tau variant isoform X1 [Bombyx mori]	640816148	XM_008066678.1	51	1.2992e-15	PREDICTED: Tarsius syrichta cleavage stimulation factor, 3' pre-RNA, subunit 2, 64kDa, tau variant (CSTF2T), mRNA	K14407	CSTF2, RNA15	cleavage stimulation factor subunit 2	http://www.genome.jp/dbget-bin/www_bget?ko:K14407	Q8HXM1	736	2.01626e-91	Cleavage stimulation factor subunit 2 OS=Bos taurus GN=CSTF2 PE=2 SV=1	PF00076//PF06858	RNA recognition motif. (a.k.a. RRM, RBD, or RNP domain)//Nucleolar GTP-binding protein 1 (NOG1)	--	--	GO:0003676//GO:0005525	nucleic acid binding//GTP binding	--	--	KOG0108	mRNA cleavage and polyadenylation factor I complex, subunit RNA15
c33007_g1	225	--	--	--	--	--	--	--	--	--	--	--	--	--	--	--	--	--	--	--	--	--	--	--	--	--	--	--	--
c42275_g1	398	357617525	EHJ70840.1	182	2.48389e-13	hypothetical protein KGM_13363 [Danaus plexippus]	--	--	--	--	--	--	--	--	--	--	--	--	--	--	--	GO:0038032//GO:0007165	termination of G-protein coupled receptor signaling pathway//signal transduction	GO:0005057	receptor signaling protein activity	--	--	--	--
c84271_g1	288	--	--	--	--	--	--	--	--	--	--	--	--	--	--	--	--	--	--	--	--	--	--	--	--	--	--	--	--
c78361_g1	378	--	--	--	--	--	--	--	--	--	--	--	--	--	--	--	--	--	--	--	--	--	--	--	--	--	--	--	--
c51127_g1	2365	357631349	EHJ78905.1	2419	0	hook protein [Danaus plexippus]	512923170	XM_004930231.1	134	2.78905e-61	PREDICTED: Bombyx mori protein hook-like (LOC101736491), mRNA	K16536	HOOK3	protein HOOK3	http://www.genome.jp/dbget-bin/www_bget?ko:K16536	Q17AF4	1117	1.8856e-139	Protein hook OS=Aedes aegypti GN=hk PE=3 SV=1	PF00307	Calponin homology (CH) domain	GO:0000226	microtubule cytoskeleton organization	GO:0008017//GO:0005515	microtubule binding//protein binding	GO:0045298//GO:0005737	tubulin complex//cytoplasm	--	--
c32719_g1	293	--	--	--	--	--	--	--	--	--	--	--	--	--	--	--	--	--	--	--	--	--	--	--	--	--	--	--	--
c52640_g1	1994	357615525	EHJ69710.1	1418	0	hypothetical protein KGM_19245 [Danaus plexippus]	--	--	--	--	--	K09884	AQPN	aquaporin rerated protein, invertebrate	http://www.genome.jp/dbget-bin/www_bget?ko:K09884	Q8IXF9	158	3.32852e-10	Aquaporin-12A OS=Homo sapiens GN=AQP12A PE=2 SV=1	PF04792//PF00230	V antigen (LcrV) protein//Major intrinsic protein	GO:0009405//GO:0006810	pathogenesis//transport	GO:0005215	transporter activity	GO:0016020//GO:0005576	membrane//extracellular region	--	--
c54360_g1	4859	357627496	EHJ77175.1	1524	0	putative Liprin-alpha [Danaus plexippus]	512925320	XM_004930753.1	548	0	PREDICTED: Bombyx mori liprin-alpha-1-like (LOC101746727), mRNA	--	--	--	--	Q13136	1094	3.67908e-124	Liprin-alpha-1 OS=Homo sapiens GN=PPFIA1 PE=1 SV=1	PF07647//PF01213	SAM domain (Sterile alpha motif)//Adenylate cyclase associated (CAP) N terminal	GO:0007010	cytoskeleton organization	GO:0003779//GO:0005515	actin binding//protein binding	--	--	KOG0249	LAR-interacting protein and related proteins
c2809_g1	411	--	--	--	--	--	--	--	--	--	--	--	--	--	--	--	--	--	--	--	--	--	--	--	--	--	--	--	--
c41360_g1	663	--	--	--	--	--	--	--	--	--	--	--	--	--	--	--	--	--	--	--	--	--	--	--	--	--	--	--	--
c47376_g1	1141	--	--	--	--	--	--	--	--	--	--	--	--	--	--	--	--	--	--	--	--	--	--	--	--	--	--	--	--
c13762_g1	203	--	--	--	--	--	--	--	--	--	--	--	--	--	--	--	--	--	--	--	--	--	--	--	--	--	--	--	--
c63520_g1	449	--	--	--	--	--	--	--	--	--	--	--	--	--	--	--	--	--	--	--	--	--	--	--	--	--	--	--	--
c62031_g1	563	--	--	--	--	--	--	--	--	--	--	--	--	--	--	--	--	--	--	--	--	--	--	--	--	--	--	--	--
c10913_g1	379	--	--	--	--	--	--	--	--	--	--	--	--	--	--	--	--	--	--	--	--	--	--	--	--	--	--	--	--
c75818_g1	207	--	--	--	--	--	--	--	--	--	--	--	--	--	--	--	--	--	--	--	--	--	--	--	--	--	--	--	--
c78488_g1	296	326578492	ADZ95824.1	303	1.41863e-32	reverse transcriptase, partial [Asthenidia transversaria]	--	--	--	--	--	--	--	--	--	--	--	--	--	PF00078	Reverse transcriptase (RNA-dependent DNA polymerase)	GO:0006278	RNA-dependent DNA replication	GO:0003964//GO:0003723	RNA-directed DNA polymerase activity//RNA binding	--	--	--	--
c39757_g1	244	--	--	--	--	--	--	--	--	--	--	--	--	--	--	--	--	--	--	PF01498	Transposase	GO:0015074//GO:0006313	DNA integration//transposition, DNA-mediated	GO:0004803//GO:0003677	transposase activity//DNA binding	--	--	--	--
c46737_g1	2325	--	--	--	--	--	--	--	--	--	--	--	--	--	--	--	--	--	--	--	--	--	--	--	--	--	--	--	--
c70962_g1	224	--	--	--	--	--	--	--	--	--	--	--	--	--	--	--	--	--	--	--	--	--	--	--	--	--	--	--	--
c79020_g1	234	--	--	--	--	--	--	--	--	--	--	--	--	--	--	--	--	--	--	--	--	--	--	--	--	--	--	--	--
c88707_g1	220	--	--	--	--	--	--	--	--	--	--	--	--	--	--	--	--	--	--	--	--	--	--	--	--	--	--	--	--
c70646_g1	391	--	--	--	--	--	--	--	--	--	--	--	--	--	--	--	--	--	--	--	--	--	--	--	--	--	--	--	--
c45857_g1	547	--	--	--	--	--	319918815	AB597008.1	123	8.02116e-56	Ostrinia nubilalis OnOr6 gene for odorant receptor, partial cds, clone: 01I19	--	--	--	--	--	--	--	--	--	--	--	--	--	--	--	--	--	--
c78689_g1	366	--	--	--	--	--	--	--	--	--	--	--	--	--	--	--	--	--	--	--	--	--	--	--	--	--	--	--	--
c85035_g1	210	--	--	--	--	--	--	--	--	--	--	--	--	--	--	--	--	--	--	--	--	--	--	--	--	--	--	--	--
c37640_g1	352	--	--	--	--	--	--	--	--	--	--	--	--	--	--	--	--	--	--	--	--	--	--	--	--	--	--	--	--
c23901_g1	695	--	--	--	--	--	--	--	--	--	--	--	--	--	--	--	--	--	--	--	--	--	--	--	--	--	--	--	--
c46262_g1	1492	--	--	--	--	--	--	--	--	--	--	--	--	--	--	--	--	--	--	--	--	--	--	--	--	--	--	--	--
c64846_g1	253	--	--	--	--	--	--	--	--	--	--	--	--	--	--	--	--	--	--	--	--	--	--	--	--	--	--	--	--
c35789_g1	256	--	--	--	--	--	--	--	--	--	--	--	--	--	--	--	--	--	--	--	--	--	--	--	--	--	--	--	--
c67539_g1	375	512933919	XP_004932910.1	326	1.41781e-32	PREDICTED: collagen alpha-2(XI) chain-like [Bombyx mori]	--	--	--	--	--	--	--	--	--	--	--	--	--	--	--	--	--	--	--	--	--	KOG3544	Collagens (type IV and type XIII), and related proteins
c55106_g2	865	--	--	--	--	--	--	--	--	--	--	--	--	--	--	--	--	--	--	--	--	--	--	--	--	--	--	--	--
c80746_g1	237	--	--	--	--	--	--	--	--	--	--	--	--	--	--	--	--	--	--	--	--	--	--	--	--	--	--	--	--
c48388_g1	1220	--	--	--	--	--	--	--	--	--	--	--	--	--	--	--	--	--	--	--	--	--	--	--	--	--	--	--	--
c20903_g1	860	--	--	--	--	--	--	--	--	--	--	--	--	--	--	--	--	--	--	--	--	--	--	--	--	--	--	--	--
c35592_g2	216	--	--	--	--	--	--	--	--	--	--	--	--	--	--	--	--	--	--	--	--	--	--	--	--	--	--	--	--
c51180_g3	1023	--	--	--	--	--	--	--	--	--	--	--	--	--	--	--	--	--	--	--	--	--	--	--	--	--	--	--	--
c64667_g1	512	--	--	--	--	--	--	--	--	--	--	--	--	--	--	--	--	--	--	--	--	--	--	--	--	--	--	--	--
c54232_g1	2937	512932816	XP_004932637.1	3481	0	PREDICTED: DNA mismatch repair protein Msh2-like [Bombyx mori]	--	--	--	--	--	K08735	MSH2	DNA mismatch repair protein MSH2	http://www.genome.jp/dbget-bin/www_bget?ko:K08735	Q5XXB5	1823	0	DNA mismatch repair protein Msh2 OS=Chlorocebus aethiops GN=MSH2 PE=2 SV=1	PF00488//PF05192//PF05190//PF05188//PF01624	MutS domain V//MutS domain III//MutS family domain IV//MutS domain II//MutS domain I	GO:0006298	mismatch repair	GO:0030983//GO:0005524	mismatched DNA binding//ATP binding	--	--	KOG0219	Mismatch repair ATPase MSH2 (MutS family)
c47015_g1	1372	--	--	--	--	--	--	--	--	--	--	--	--	--	--	--	--	--	--	PF01097//PF00451	Arthropod defensin//Scorpion short toxin, BmKK2	GO:0006952//GO:0009405//GO:0006810	defense response//pathogenesis//transport	GO:0008200	ion channel inhibitor activity	GO:0005576	extracellular region	--	--
c60236_g1	300	--	--	--	--	--	--	--	--	--	--	--	--	--	--	--	--	--	--	--	--	--	--	--	--	--	--	--	--
c6529_g1	284	--	--	--	--	--	--	--	--	--	--	--	--	--	--	--	--	--	--	--	--	--	--	--	--	--	--	--	--
c40953_g1	1051	326911821	XP_003202254.1	716	3.55434e-91	PREDICTED: histone H3.2-like [Meleagris gallopavo]	88866896	DQ393939.1	266	5.09541e-135	Cydia pomonella clone Cp4.P microsatellite sequence	K11253	H3	histone H3	http://www.genome.jp/dbget-bin/www_bget?ko:K11253	P84239	700	1.53708e-90	Histone H3 OS=Urechis caupo PE=1 SV=2	PF00125//PF00808	Core histone H2A/H2B/H3/H4//Histone-like transcription factor (CBF/NF-Y) and archaeal histone	--	--	GO:0043565//GO:0003677	sequence-specific DNA binding//DNA binding	GO:0005622	intracellular	KOG1745	Histones H3 and H4
c76588_g1	295	--	--	--	--	--	--	--	--	--	--	--	--	--	--	--	--	--	--	--	--	--	--	--	--	--	--	--	--
c24537_g1	484	--	--	--	--	--	--	--	--	--	--	--	--	--	--	--	--	--	--	--	--	--	--	--	--	--	--	--	--
c58546_g1	258	--	--	--	--	--	--	--	--	--	--	--	--	--	--	--	--	--	--	--	--	--	--	--	--	--	--	--	--
c46281_g1	1034	512910329	XP_004927145.1	877	2.68074e-114	PREDICTED: protein takeout-like isoform X1 [Bombyx mori] >gi|512910333|ref|XP_004927146.1| PREDICTED: protein takeout-like isoform X2 [Bombyx mori]	--	--	--	--	--	--	--	--	--	O76879	218	4.82345e-19	Circadian clock-controlled protein OS=Drosophila melanogaster GN=anon-3B1.2 PE=2 SV=2	--	--	--	--	--	--	--	--	--	--
c81202_g1	463	391867515	EIT76761.1	370	4.73011e-39	trehalose-6-phosphate synthase component TPS1 [Aspergillus oryzae 3.042] >gi|635508267|gb|KDE80251.1| trehalose-6-phosphate [Aspergillus oryzae 100-8]	317143646	XM_001819547.2	421	0	Aspergillus oryzae RIB40 alpha,alpha-trehalose-phosphate synthase [UDP-forming] 1, mRNA	--	--	--	--	Q00075	261	1.7952e-25	Alpha,alpha-trehalose-phosphate synthase [UDP-forming] 1 OS=Aspergillus niger GN=tpsA PE=3 SV=1	PF00982	Glycosyltransferase family 20	GO:0005992	trehalose biosynthetic process	GO:0003824	catalytic activity	--	--	--	--
c45012_g1	1024	357621802	EHJ73509.1	842	2.72416e-108	hypothetical protein KGM_00165 [Danaus plexippus]	571544269	XM_395548.5	42	1.64592e-10	PREDICTED: Apis mellifera hexaprenyldihydroxybenzoate methyltransferase, mitochondrial-like (LOC412082), mRNA	K00591	COQ3	hexaprenyldihydroxybenzoate methyltransferase	http://www.genome.jp/dbget-bin/www_bget?ko:K00591	Q63159	569	3.75345e-68	Hexaprenyldihydroxybenzoate methyltransferase, mitochondrial OS=Rattus norvegicus GN=Coq3 PE=2 SV=2	PF02390//PF01209//PF05401//PF00107//PF01135//PF08241//PF00398//PF06325//PF05175//PF05724//PF02353	Putative methyltransferase//ubiE/COQ5 methyltransferase family//Nodulation protein S (NodS)//Zinc-binding dehydrogenase//Protein-L-isoaspartate(D-aspartate) O-methyltransferase (PCMT)//Methyltransferase domain//Ribosomal RNA adenine dimethylase//Ribosomal protein L11 methyltransferase (PrmA)//Methyltransferase small domain//Thiopurine S-methyltransferase (TPMT)//Mycolic acid cyclopropane syntheta…	GO:0008152//GO:0008610//GO:0000154//GO:0006464//GO:0046500//GO:0009877//GO:0006744//GO:0006400//GO:0009312//GO:0008033//GO:0006396//GO:0055114//GO:0009451//GO:0006479	metabolic process//lipid biosynthetic process//rRNA modification//cellular protein modification process//S-adenosylmethionine metabolic process//nodulation//ubiquinone biosynthetic process//tRNA modification//oligosaccharide biosynthetic process//tRNA processing//RNA processing//oxidation-reduction process//RNA modification//protein methylation	GO:0008176//GO:0008276//GO:0008649//GO:0000179//GO:0008425//GO:0008168//GO:0004719//GO:0008757//GO:0016491//GO:0008270	tRNA (guanine-N7-)-methyltransferase activity//protein methyltransferase activity//rRNA methyltransferase activity//rRNA (adenine-N6,N6-)-dimethyltransferase activity//2-polyprenyl-6-methoxy-1,4-benzoquinone methyltransferase activity//methyltransferase activity//protein-L-isoaspartate (D-aspartate) O-methyltransferase activity//S-adenosylmethionine-dependent methyltransferase activity//oxidoredu…	GO:0005737	cytoplasm	KOG1270	Methyltransferases
c69251_g1	226	--	--	--	--	--	--	--	--	--	--	--	--	--	--	--	--	--	--	--	--	--	--	--	--	--	--	--	--
c74162_g1	329	--	--	--	--	--	--	--	--	--	--	--	--	--	--	--	--	--	--	--	--	--	--	--	--	--	--	--	--
c51453_g1	562	--	--	--	--	--	--	--	--	--	--	--	--	--	--	--	--	--	--	--	--	--	--	--	--	--	--	--	--
c81940_g1	211	--	--	--	--	--	--	--	--	--	--	--	--	--	--	--	--	--	--	--	--	--	--	--	--	--	--	--	--
c57335_g1	576	--	--	--	--	--	--	--	--	--	--	--	--	--	--	--	--	--	--	--	--	--	--	--	--	--	--	--	--
c49164_g1	1810	512918291	XP_004929097.1	1174	8.75744e-149	PREDICTED: ataxin-2-like protein-like [Bombyx mori]	512918290	XM_004929040.1	294	2.41985e-150	PREDICTED: Bombyx mori ataxin-2-like protein-like (LOC101743989), mRNA	--	--	--	--	Q29A33	463	4.23265e-47	Ataxin-2 homolog OS=Drosophila pseudoobscura pseudoobscura GN=Atx2 PE=3 SV=2	PF05184	Saposin-like type B, region 1	GO:0006629	lipid metabolic process	--	--	--	--	KOG2375	Protein interacting with poly(A)-binding protein
c47077_g2	1156	--	--	--	--	--	--	--	--	--	--	--	--	--	--	--	--	--	--	--	--	--	--	--	--	--	--	--	--
c45628_g1	5386	512914036	XP_004928041.1	4472	0	PREDICTED: mucin-19-like [Bombyx mori]	512914035	XM_004927984.1	1428	0	PREDICTED: Bombyx mori mucin-19-like (LOC101744850), mRNA	--	--	--	--	--	--	--	--	PF00985//PF01767	Merozoite Surface Antigen 2 (MSA-2) family//Birnavirus VP3 protein	GO:0007155	cell adhesion	GO:0005198	structural molecule activity	--	--	KOG4805	Uncharacterized conserved protein
c84324_g1	348	--	--	--	--	--	--	--	--	--	--	--	--	--	--	--	--	--	--	--	--	--	--	--	--	--	--	--	--
c39653_g1	752	--	--	--	--	--	--	--	--	--	--	--	--	--	--	--	--	--	--	--	--	--	--	--	--	--	--	--	--
c66232_g1	235	--	--	--	--	--	--	--	--	--	--	--	--	--	--	--	--	--	--	--	--	--	--	--	--	--	--	--	--
c49973_g1	1549	357620501	EHJ72666.1	1650	0	putative venom acid phosphatase [Danaus plexippus]	512918838	XM_004929173.1	254	3.55299e-128	PREDICTED: Bombyx mori venom acid phosphatase Acph-1-like (LOC101745434), mRNA	--	--	--	--	Q5BLY5	410	4.63245e-43	Venom acid phosphatase Acph-1 OS=Apis mellifera PE=1 SV=1	PF00328	Histidine phosphatase superfamily (branch 2)	GO:0019497//GO:0006771	hexachlorocyclohexane metabolic process//riboflavin metabolic process	GO:0003993	acid phosphatase activity	--	--	KOG3720	Lysosomal & prostatic acid phosphatases
c39255_g1	407	357616676	EHJ70332.1	367	1.50309e-37	lacunin [Danaus plexippus]	--	--	--	--	--	--	--	--	--	Q868Z9	258	1.89306e-24	Papilin OS=Drosophila melanogaster GN=Ppn PE=1 SV=2	PF00014	Kunitz/Bovine pancreatic trypsin inhibitor domain	--	--	GO:0004867	serine-type endopeptidase inhibitor activity	--	--	KOG4295	Serine proteinase inhibitor (KU family)
c64717_g1	276	--	--	--	--	--	--	--	--	--	--	--	--	--	--	--	--	--	--	--	--	--	--	--	--	--	--	--	--
c49245_g2	434	--	--	--	--	--	--	--	--	--	--	--	--	--	--	--	--	--	--	PF11531	Coactivator-associated arginine methyltransferase 1 N terminal	GO:0009405	pathogenesis	--	--	--	--	--	--
c31438_g1	465	--	--	--	--	--	--	--	--	--	--	--	--	--	--	--	--	--	--	--	--	--	--	--	--	--	--	--	--
c10610_g1	459	--	--	--	--	--	--	--	--	--	--	--	--	--	--	--	--	--	--	--	--	--	--	--	--	--	--	--	--
c81135_g1	340	--	--	--	--	--	--	--	--	--	--	--	--	--	--	--	--	--	--	--	--	--	--	--	--	--	--	--	--
c54213_g2	437	--	--	--	--	--	--	--	--	--	--	--	--	--	--	--	--	--	--	--	--	--	--	--	--	--	--	--	--
c51923_g1	2686	379698902	NP_001243922.1	2809	0	scarlet [Bombyx mori] >gi|326784694|dbj|BAK08373.1| scarlet [Bombyx mori]	--	--	--	--	--	--	--	--	--	P45843	1697	0	Protein scarlet OS=Drosophila melanogaster GN=st PE=1 SV=3	PF01695//PF00004//PF00931//PF01061//PF02367//PF01926//PF10662//PF03193//PF00005	IstB-like ATP binding protein//ATPase family associated with various cellular activities (AAA)//NB-ARC domain//ABC-2 type transporter//Uncharacterised P-loop hydrolase UPF0079//50S ribosome-binding GTPase//Ethanolamine utilisation - propanediol utilisation//Protein of unknown function, DUF258//ABC transporter	GO:0006200//GO:0006576//GO:0070526	ATP catabolic process//cellular biogenic amine metabolic process//threonylcarbamoyladenosine biosynthetic process	GO:0003924//GO:0043531//GO:0005525//GO:0005524//GO:0016887	GTPase activity//ADP binding//GTP binding//ATP binding//ATPase activity	GO:0016020	membrane	KOG0061	Transporter, ABC superfamily (Breast cancer resistance protein)
c45486_g1	1276	--	--	--	--	--	--	--	--	--	--	--	--	--	--	--	--	--	--	--	--	--	--	--	--	--	--	--	--
c88080_g1	503	--	--	--	--	--	--	--	--	--	--	--	--	--	--	--	--	--	--	--	--	--	--	--	--	--	--	--	--
c57031_g1	818	--	--	--	--	--	--	--	--	--	--	--	--	--	--	--	--	--	--	--	--	--	--	--	--	--	--	--	--
c77612_g1	211	--	--	--	--	--	--	--	--	--	--	--	--	--	--	--	--	--	--	--	--	--	--	--	--	--	--	--	--
c60678_g1	244	--	--	--	--	--	--	--	--	--	--	--	--	--	--	--	--	--	--	--	--	--	--	--	--	--	--	--	--
c53458_g1	1560	345548872	AEO12697.1	2579	0	aminopeptidase N3c [Ostrinia nubilalis]	157021215	EU137839.1	645	0	Ostrinia furnacalis aminopeptidase N mRNA, complete cds	--	--	--	--	Q11000	1643	0	Membrane alanyl aminopeptidase OS=Heliothis virescens PE=1 SV=1	PF01433	Peptidase family M1	GO:0006508	proteolysis	GO:0004222//GO:0004177//GO:0008270//GO:0008237	metalloendopeptidase activity//aminopeptidase activity//zinc ion binding//metallopeptidase activity	--	--	KOG1046	Puromycin-sensitive aminopeptidase and related aminopeptidases
c15962_g1	294	--	--	--	--	--	--	--	--	--	--	--	--	--	--	--	--	--	--	--	--	--	--	--	--	--	--	--	--
c19214_g1	449	--	--	--	--	--	--	--	--	--	--	--	--	--	--	--	--	--	--	--	--	--	--	--	--	--	--	--	--
c77060_g1	212	317151352	XP_001824607.2	264	2.82132e-25	MFS monosaccharide transporter [Aspergillus oryzae RIB40]	83773123	AP007167.1	180	5.78862e-88	Aspergillus oryzae RIB40 DNA, SC020	--	--	--	--	--	--	--	--	PF05039	Agouti protein	GO:0009755	hormone-mediated signaling pathway	--	--	GO:0005576	extracellular region	--	--
c9865_g1	325	--	--	--	--	--	--	--	--	--	--	--	--	--	--	--	--	--	--	--	--	--	--	--	--	--	--	--	--
c55890_g1	949	--	--	--	--	--	--	--	--	--	--	--	--	--	--	--	--	--	--	--	--	--	--	--	--	--	--	--	--
c42264_g1	1515	385298709	NP_001245290.1	2133	0	voltage-dependent cation channel SC1 [Bombyx mori] >gi|378829682|gb|AFC61133.1| voltage-dependent cation channel SC1 [Bombyx mori]	385298708	NM_001258361.1	567	0	Bombyx mori voltage-dependent cation channel SC1 (SC1), mRNA >gnl|BL_ORD_ID|14363145 Bombyx mori voltage-dependent cation channel SC1 mRNA, complete cds	K04838	SCN5A	voltage-gated sodium channel type V alpha	http://www.genome.jp/dbget-bin/www_bget?ko:K04838	Q9W0Y8	1683	0	Sodium channel protein 60E OS=Drosophila melanogaster GN=NaCP60E PE=2 SV=5	PF06236//PF00520	Tyrosinase co-factor MelC1//Ion transport protein	GO:0035725//GO:0006811//GO:0042438//GO:0006814//GO:0034765//GO:0055085	sodium ion transmembrane transport//ion transport//melanin biosynthetic process//sodium ion transport//regulation of ion transmembrane transport//transmembrane transport	GO:0005248//GO:0005507//GO:0005216	voltage-gated sodium channel activity//copper ion binding//ion channel activity	GO:0016020//GO:0001518	membrane//voltage-gated sodium channel complex	KOG2301	Voltage-gated Ca2+ channels, alpha1 subunits
c71203_g1	223	--	--	--	--	--	--	--	--	--	--	--	--	--	--	--	--	--	--	--	--	--	--	--	--	--	--	--	--
c67069_g1	243	--	--	--	--	--	--	--	--	--	--	--	--	--	--	--	--	--	--	--	--	--	--	--	--	--	--	--	--
c39752_g1	518	--	--	--	--	--	--	--	--	--	--	--	--	--	--	--	--	--	--	--	--	--	--	--	--	--	--	--	--
c17137_g1	453	--	--	--	--	--	--	--	--	--	--	--	--	--	--	--	--	--	--	--	--	--	--	--	--	--	--	--	--
c87589_g1	222	--	--	--	--	--	--	--	--	--	--	--	--	--	--	--	--	--	--	--	--	--	--	--	--	--	--	--	--
c50339_g1	1744	512919691	XP_004929447.1	1873	0	PREDICTED: endoplasmic reticulum lectin 1-like [Bombyx mori]	--	--	--	--	--	K14008	ERLEC1, XTP3B	endoplasmic reticulum lectin 1	http://www.genome.jp/dbget-bin/www_bget?ko:K14008	Q8VEH8	867	1.48824e-107	Endoplasmic reticulum lectin 1 OS=Mus musculus GN=Erlec1 PE=2 SV=1	--	--	--	--	--	--	--	--	KOG3394	Protein OS-9
c64673_g1	268	--	--	--	--	--	--	--	--	--	--	--	--	--	--	--	--	--	--	--	--	--	--	--	--	--	--	--	--
c767_g1	284	--	--	--	--	--	--	--	--	--	--	--	--	--	--	--	--	--	--	--	--	--	--	--	--	--	--	--	--
c81561_g1	209	--	--	--	--	--	--	--	--	--	--	--	--	--	--	--	--	--	--	--	--	--	--	--	--	--	--	--	--
c57175_g1	227	--	--	--	--	--	--	--	--	--	--	--	--	--	--	--	--	--	--	--	--	--	--	--	--	--	--	--	--
c66690_g1	284	--	--	--	--	--	--	--	--	--	--	--	--	--	--	--	--	--	--	--	--	--	--	--	--	--	--	--	--
c7719_g1	281	--	--	--	--	--	--	--	--	--	--	--	--	--	--	--	--	--	--	--	--	--	--	--	--	--	--	--	--
c51985_g1	4733	512886547	XP_004921775.1	6066	0	PREDICTED: protein toll-like [Bombyx mori]	512886546	XM_004921718.1	1841	0	PREDICTED: Bombyx mori protein toll-like (LOC101744630), mRNA	--	--	--	--	P08953	636	2.89447e-66	Protein toll OS=Drosophila melanogaster GN=Tl PE=1 SV=1	PF00560//PF01582//PF13676	Leucine Rich Repeat//TIR domain//TIR domain	GO:0007165	signal transduction	GO:0005515	protein binding	--	--	KOG4641	FOG: Toll/interleukin receptor and related proteins containing LRR and TIR repeats
c18918_g1	425	--	--	--	--	--	--	--	--	--	--	--	--	--	--	--	--	--	--	--	--	--	--	--	--	--	--	--	--
c23554_g1	346	--	--	--	--	--	--	--	--	--	--	--	--	--	--	--	--	--	--	--	--	--	--	--	--	--	--	--	--
c27870_g1	676	--	--	--	--	--	--	--	--	--	--	--	--	--	--	Q9W0K0	122	1.84468e-06	JNK-interacting protein 1 OS=Drosophila melanogaster GN=Aplip1 PE=1 SV=2	--	--	--	--	--	--	--	--	--	--
c67702_g1	229	--	--	--	--	--	--	--	--	--	--	--	--	--	--	--	--	--	--	--	--	--	--	--	--	--	--	--	--
c40921_g2	208	--	--	--	--	--	--	--	--	--	--	--	--	--	--	--	--	--	--	--	--	--	--	--	--	--	--	--	--
c28189_g2	295	--	--	--	--	--	--	--	--	--	--	--	--	--	--	--	--	--	--	--	--	--	--	--	--	--	--	--	--
c49614_g1	659	--	--	--	--	--	--	--	--	--	--	--	--	--	--	--	--	--	--	--	--	--	--	--	--	--	--	--	--
c46042_g1	4128	512927539	XP_004931360.1	2318	0	PREDICTED: probable ATP-dependent RNA helicase DDX43-like [Bombyx mori]	512927538	XM_004931303.1	453	0	PREDICTED: Bombyx mori probable ATP-dependent RNA helicase DDX43-like (LOC101735665), mRNA	K17043	DDX43	ATP-dependent RNA helicase DDX43	http://www.genome.jp/dbget-bin/www_bget?ko:K17043	Q9NXZ2	1429	1.40372e-179	Probable ATP-dependent RNA helicase DDX43 OS=Homo sapiens GN=DDX43 PE=2 SV=2	PF00176//PF00549//PF00270//PF13184//PF02629//PF13014//PF00013//PF13380//PF04851//PF07650//PF00271//PF01408	SNF2 family N-terminal domain//CoA-ligase//DEAD/DEAH box helicase//NusA-like KH domain//CoA binding domain//KH domain//KH domain//CoA binding domain//Type III restriction enzyme, res subunit//KH domain//Helicase conserved C-terminal domain//Oxidoreductase family, NAD-binding Rossmann fold	GO:0008152	metabolic process	GO:0005524//GO:0003676//GO:0008026//GO:0048037//GO:0004386//GO:0003723//GO:0003677//GO:0016787//GO:0003824//GO:0016491	ATP binding//nucleic acid binding//ATP-dependent helicase activity//cofactor binding//helicase activity//RNA binding//DNA binding//hydrolase activity//catalytic activity//oxidoreductase activity	--	--	KOG0336	ATP-dependent RNA helicase
c49315_g3	254	--	--	--	--	--	619325824	FO681381.1	47	6.13689e-14	Spodoptera frugiperda sequence from BAC clone 68E14	--	--	--	--	--	--	--	--	--	--	--	--	--	--	--	--	--	--
c75216_g1	209	--	--	--	--	--	--	--	--	--	--	--	--	--	--	--	--	--	--	--	--	--	--	--	--	--	--	--	--
c27904_g1	258	--	--	--	--	--	--	--	--	--	--	--	--	--	--	--	--	--	--	--	--	--	--	--	--	--	--	--	--
c44136_g1	997	--	--	--	--	--	--	--	--	--	--	--	--	--	--	--	--	--	--	--	--	--	--	--	--	--	--	--	--
c44599_g1	1195	512915634	XP_004928437.1	1005	5.08039e-128	PREDICTED: uncharacterized protein LOC101738048 [Bombyx mori]	--	--	--	--	--	K01310	CTRB	chymotrypsin	http://www.genome.jp/dbget-bin/www_bget?ko:K01310	Q00871	328	2.37534e-33	Chymotrypsin BI OS=Litopenaeus vannamei PE=1 SV=1	PF10589//PF00089//PF12592	NADH-ubiquinone oxidoreductase-F iron-sulfur binding region//Trypsin//Protein of unknown function (DUF3763)	GO:0006508//GO:0055114	proteolysis//oxidation-reduction process	GO:0004252//GO:0016820	serine-type endopeptidase activity//hydrolase activity, acting on acid anhydrides, catalyzing transmembrane movement of substances	--	--	KOG3627	Trypsin
c76038_g1	288	--	--	--	--	--	--	--	--	--	--	--	--	--	--	--	--	--	--	--	--	--	--	--	--	--	--	--	--
c30312_g1	253	443715679	ELU07542.1	191	5.73537e-17	hypothetical protein CAPTEDRAFT_48911, partial [Capitella teleta]	--	--	--	--	--	--	--	--	--	Q9NBX4	119	4.94066e-07	Probable RNA-directed DNA polymerase from transposon X-element OS=Drosophila melanogaster GN=X-element\ORF2 PE=3 SV=1	PF00078	Reverse transcriptase (RNA-dependent DNA polymerase)	GO:0006278	RNA-dependent DNA replication	GO:0003964//GO:0003723	RNA-directed DNA polymerase activity//RNA binding	--	--	--	--
c23644_g1	244	--	--	--	--	--	--	--	--	--	--	--	--	--	--	--	--	--	--	--	--	--	--	--	--	--	--	--	--
c76451_g1	434	--	--	--	--	--	--	--	--	--	--	--	--	--	--	--	--	--	--	--	--	--	--	--	--	--	--	--	--
c26876_g1	1056	270015673	EFA12121.1	555	3.04445e-64	hypothetical protein TcasGA2_TC002267 [Tribolium castaneum]	--	--	--	--	--	--	--	--	--	Q8I7P9	264	1.90184e-23	Retrovirus-related Pol polyprotein from transposon opus OS=Drosophila melanogaster GN=pol PE=4 SV=1	PF00665//PF00957//PF06638	Integrase core domain//Synaptobrevin//Strabismus protein	GO:0016192//GO:0015074//GO:0007275	vesicle-mediated transport//DNA integration//multicellular organismal development	--	--	GO:0016021	integral component of membrane	KOG0017	FOG: Transposon-encoded proteins with TYA, reverse transcriptase, integrase domains in various combinations
c74237_g1	226	--	--	--	--	--	--	--	--	--	--	--	--	--	--	--	--	--	--	PF03784	Cyclotide family	GO:0006952	defense response	--	--	--	--	--	--
c22848_g1	290	--	--	--	--	--	--	--	--	--	--	--	--	--	--	--	--	--	--	--	--	--	--	--	--	--	--	--	--
c76052_g1	520	--	--	--	--	--	--	--	--	--	--	--	--	--	--	--	--	--	--	--	--	--	--	--	--	--	--	--	--
c29246_g1	842	--	--	--	--	--	--	--	--	--	--	--	--	--	--	--	--	--	--	--	--	--	--	--	--	--	--	--	--
c72592_g1	202	--	--	--	--	--	--	--	--	--	--	--	--	--	--	--	--	--	--	--	--	--	--	--	--	--	--	--	--
c87344_g1	295	--	--	--	--	--	--	--	--	--	--	--	--	--	--	--	--	--	--	--	--	--	--	--	--	--	--	--	--
c70973_g1	202	--	--	--	--	--	--	--	--	--	--	--	--	--	--	--	--	--	--	--	--	--	--	--	--	--	--	--	--
c88306_g1	247	--	--	--	--	--	--	--	--	--	--	--	--	--	--	--	--	--	--	--	--	--	--	--	--	--	--	--	--
c38897_g2	1651	270015858	EFA12306.1	811	1.69401e-95	hypothetical protein TcasGA2_TC016101 [Tribolium castaneum]	--	--	--	--	--	--	--	--	--	P21328	306	6.08379e-28	RNA-directed DNA polymerase from mobile element jockey OS=Drosophila melanogaster GN=pol PE=1 SV=1	PF00078	Reverse transcriptase (RNA-dependent DNA polymerase)	GO:0006278	RNA-dependent DNA replication	GO:0003723//GO:0003964	RNA binding//RNA-directed DNA polymerase activity	--	--	KOG1075	FOG: Reverse transcriptase
c45364_g1	478	--	--	--	--	--	--	--	--	--	--	--	--	--	--	--	--	--	--	--	--	--	--	--	--	--	--	--	--
c56046_g1	6550	357612190	EHJ67857.1	7024	0	hypothetical protein KGM_00084 [Danaus plexippus]	512887956	XM_004921951.1	1612	0	PREDICTED: Bombyx mori myosin heavy chain, non-muscle-like (LOC101736643), mRNA	K10352	MYH	myosin heavy chain	http://www.genome.jp/dbget-bin/www_bget?ko:K10352	Q99323	6015	0	Myosin heavy chain, non-muscle OS=Drosophila melanogaster GN=zip PE=1 SV=2	PF00063//PF02736//PF01576//PF00612	Myosin head (motor domain)//Myosin N-terminal SH3-like domain//Myosin tail//IQ calmodulin-binding motif	--	--	GO:0003774//GO:0003779//GO:0005515//GO:0005524	motor activity//actin binding//protein binding//ATP binding	GO:0016459	myosin complex	KOG0161	Myosin class II heavy chain
c26409_g1	311	--	--	--	--	--	--	--	--	--	--	--	--	--	--	--	--	--	--	--	--	--	--	--	--	--	--	--	--
c73707_g1	215	--	--	--	--	--	--	--	--	--	--	--	--	--	--	--	--	--	--	--	--	--	--	--	--	--	--	--	--
c50689_g1	581	357625903	EHJ76189.1	362	2.69771e-36	eIF2B-beta protein [Danaus plexippus]	--	--	--	--	--	--	--	--	--	P49770	135	1.94582e-08	Translation initiation factor eIF-2B subunit beta OS=Homo sapiens GN=EIF2B2 PE=1 SV=3	PF01008	Initiation factor 2 subunit family	GO:0044237	cellular metabolic process	GO:0043169	cation binding	--	--	KOG1465	Translation initiation factor 2B, beta subunit (eIF-2Bbeta/GCD7)
c7543_g1	310	--	--	--	--	--	--	--	--	--	--	--	--	--	--	--	--	--	--	--	--	--	--	--	--	--	--	--	--
c26746_g1	314	--	--	--	--	--	--	--	--	--	--	--	--	--	--	--	--	--	--	--	--	--	--	--	--	--	--	--	--
c74316_g1	626	--	--	--	--	--	--	--	--	--	--	--	--	--	--	--	--	--	--	--	--	--	--	--	--	--	--	--	--
c83937_g1	383	--	--	--	--	--	--	--	--	--	--	--	--	--	--	--	--	--	--	--	--	--	--	--	--	--	--	--	--
c30331_g1	252	--	--	--	--	--	--	--	--	--	--	--	--	--	--	--	--	--	--	--	--	--	--	--	--	--	--	--	--
c14140_g1	384	--	--	--	--	--	--	--	--	--	--	--	--	--	--	--	--	--	--	--	--	--	--	--	--	--	--	--	--
c86541_g1	320	--	--	--	--	--	--	--	--	--	--	--	--	--	--	--	--	--	--	--	--	--	--	--	--	--	--	--	--
c14581_g1	278	--	--	--	--	--	--	--	--	--	--	--	--	--	--	--	--	--	--	--	--	--	--	--	--	--	--	--	--
c49554_g2	3278	--	--	--	--	--	--	--	--	--	--	--	--	--	--	--	--	--	--	--	--	--	--	--	--	--	--	--	--
c46208_g3	250	--	--	--	--	--	--	--	--	--	--	--	--	--	--	--	--	--	--	--	--	--	--	--	--	--	--	--	--
c19036_g1	404	--	--	--	--	--	--	--	--	--	--	--	--	--	--	--	--	--	--	--	--	--	--	--	--	--	--	--	--
c30620_g1	216	--	--	--	--	--	--	--	--	--	--	--	--	--	--	--	--	--	--	--	--	--	--	--	--	--	--	--	--
c172_g1	333	--	--	--	--	--	--	--	--	--	--	--	--	--	--	--	--	--	--	--	--	--	--	--	--	--	--	--	--
c21150_g1	566	112983138	NP_001037040.1	410	4.92033e-44	phenol UDP-glucosyltransferase precursor [Bombyx mori] >gi|18028141|gb|AAL55994.1|AF324465_1 phenol UDP-glucosyltransferase [Bombyx mori]	--	--	--	--	--	K00699	UGT	glucuronosyltransferase	http://www.genome.jp/dbget-bin/www_bget?ko:K00699	P36511	213	2.17457e-18	UDP-glucuronosyltransferase 2B15 OS=Rattus norvegicus GN=Ugt2b15 PE=1 SV=1	PF00201	UDP-glucoronosyl and UDP-glucosyl transferase	GO:0008152	metabolic process	GO:0016758	transferase activity, transferring hexosyl groups	--	--	KOG1192	UDP-glucuronosyl and UDP-glucosyl transferase
c44705_g1	4299	270015748	EFA12196.1	2259	0	hypothetical protein TcasGA2_TC004349 [Tribolium castaneum]	--	--	--	--	--	--	--	--	--	--	--	--	--	PF03884	Domain of unknown function (DUF329)	--	--	GO:0008270	zinc ion binding	--	--	--	--
c63905_g1	422	--	--	--	--	--	--	--	--	--	--	--	--	--	--	--	--	--	--	--	--	--	--	--	--	--	--	--	--
c13066_g1	331	--	--	--	--	--	--	--	--	--	--	--	--	--	--	--	--	--	--	PF01197	Ribosomal protein L31	GO:0042254//GO:0006412	ribosome biogenesis//translation	GO:0003735	structural constituent of ribosome	GO:0005840//GO:0005622	ribosome//intracellular	--	--
c57916_g1	515	--	--	--	--	--	--	--	--	--	--	--	--	--	--	--	--	--	--	--	--	--	--	--	--	--	--	--	--
c70872_g1	273	--	--	--	--	--	--	--	--	--	--	--	--	--	--	--	--	--	--	--	--	--	--	--	--	--	--	--	--
c82149_g1	244	--	--	--	--	--	--	--	--	--	--	--	--	--	--	--	--	--	--	--	--	--	--	--	--	--	--	--	--
c46770_g1	4013	357617623	EHJ70894.1	782	1.10377e-90	hypothetical protein KGM_13036 [Danaus plexippus]	--	--	--	--	--	--	--	--	--	P83632	444	3.40048e-47	27 kDa hemolymph protein OS=Galleria mellonella PE=1 SV=1	PF00020	TNFR/NGFR cysteine-rich region	--	--	GO:0005515	protein binding	--	--	--	--
c73018_g1	338	--	--	--	--	--	--	--	--	--	--	--	--	--	--	--	--	--	--	--	--	--	--	--	--	--	--	--	--
c85291_g1	357	--	--	--	--	--	--	--	--	--	--	--	--	--	--	--	--	--	--	--	--	--	--	--	--	--	--	--	--
c49721_g1	2003	--	--	--	--	--	--	--	--	--	--	--	--	--	--	--	--	--	--	--	--	--	--	--	--	--	--	--	--
c88977_g1	237	--	--	--	--	--	--	--	--	--	--	--	--	--	--	--	--	--	--	--	--	--	--	--	--	--	--	--	--
c69963_g1	215	--	--	--	--	--	--	--	--	--	--	--	--	--	--	--	--	--	--	--	--	--	--	--	--	--	--	--	--
c5092_g2	239	--	--	--	--	--	--	--	--	--	--	--	--	--	--	--	--	--	--	--	--	--	--	--	--	--	--	--	--
c10086_g1	252	--	--	--	--	--	--	--	--	--	--	--	--	--	--	--	--	--	--	--	--	--	--	--	--	--	--	--	--
c12001_g1	231	--	--	--	--	--	--	--	--	--	--	--	--	--	--	--	--	--	--	--	--	--	--	--	--	--	--	--	--
c23155_g1	231	357615100	EHJ69472.1	381	3.54087e-42	hypothetical protein KGM_11782 [Danaus plexippus]	--	--	--	--	--	--	--	--	--	--	--	--	--	--	--	--	--	--	--	--	--	--	--
c30021_g1	225	--	--	--	--	--	--	--	--	--	--	--	--	--	--	--	--	--	--	--	--	--	--	--	--	--	--	--	--
c16249_g1	216	--	--	--	--	--	--	--	--	--	--	--	--	--	--	--	--	--	--	--	--	--	--	--	--	--	--	--	--
c45155_g1	1277	512916376	XP_004928626.1	424	7.01806e-44	PREDICTED: RNA-binding protein 33-like [Bombyx mori]	--	--	--	--	--	--	--	--	--	--	--	--	--	PF01607//PF01213	Chitin binding Peritrophin-A domain//Adenylate cyclase associated (CAP) N terminal	GO:0007010//GO:0006030	cytoskeleton organization//chitin metabolic process	GO:0003779//GO:0008061	actin binding//chitin binding	GO:0005576	extracellular region	--	--
c31937_g1	253	--	--	--	--	--	--	--	--	--	--	--	--	--	--	--	--	--	--	--	--	--	--	--	--	--	--	--	--
c20696_g1	203	--	--	--	--	--	--	--	--	--	--	--	--	--	--	--	--	--	--	--	--	--	--	--	--	--	--	--	--
c69271_g1	228	--	--	--	--	--	--	--	--	--	--	--	--	--	--	--	--	--	--	--	--	--	--	--	--	--	--	--	--
c3099_g1	269	--	--	--	--	--	--	--	--	--	--	--	--	--	--	--	--	--	--	--	--	--	--	--	--	--	--	--	--
c74225_g1	306	--	--	--	--	--	--	--	--	--	--	--	--	--	--	--	--	--	--	--	--	--	--	--	--	--	--	--	--
c483_g1	251	--	--	--	--	--	--	--	--	--	--	--	--	--	--	--	--	--	--	--	--	--	--	--	--	--	--	--	--
c49923_g1	1864	433339039	BAM73875.1	2392	0	hypothetical protein, partial [Bombyx mori]	--	--	--	--	--	--	--	--	--	Q5XIA4	489	3.43465e-51	CCR4-NOT transcription complex subunit 10 OS=Rattus norvegicus GN=Cnot10 PE=2 SV=1	PF00515//PF13181//PF04847//PF07721	Tetratricopeptide repeat//Tetratricopeptide repeat//Calcipressin//Tetratricopeptide repeat	GO:0019722	calcium-mediated signaling	GO:0005515//GO:0042802	protein binding//identical protein binding	--	--	--	--
c29726_g2	448	389609325	BAM18274.1	670	7.37002e-83	dopa decarboxylase 2 [Papilio xuthus]	--	--	--	--	--	K01593	DDC	aromatic-L-amino-acid decarboxylase	http://www.genome.jp/dbget-bin/www_bget?ko:K01593	O88533	447	1.12779e-51	Aromatic-L-amino-acid decarboxylase OS=Mus musculus GN=Ddc PE=2 SV=1	PF00282	Pyridoxal-dependent decarboxylase conserved domain	GO:0019752	carboxylic acid metabolic process	GO:0030170//GO:0016831	pyridoxal phosphate binding//carboxy-lyase activity	--	--	KOG0629	Glutamate decarboxylase and related proteins
c25085_g1	264	--	--	--	--	--	--	--	--	--	--	--	--	--	--	--	--	--	--	--	--	--	--	--	--	--	--	--	--
c49324_g1	7967	512888022	XP_004922019.1	1445	6.24996e-173	PREDICTED: uncharacterized protein LOC101738110 isoform X1 [Bombyx mori]	--	--	--	--	--	K01227	E3.2.1.96	mannosyl-glycoprotein endo-beta-N-acetylglucosaminidase	http://www.genome.jp/dbget-bin/www_bget?ko:K01227	Q8NFI3	665	9.68117e-71	Cytosolic endo-beta-N-acetylglucosaminidase OS=Homo sapiens GN=ENGASE PE=1 SV=1	PF01701	Photosystem I reaction centre subunit IX / PsaJ	GO:0015979	photosynthesis	--	--	GO:0009522	photosystem I	KOG2331	Predicted glycosylhydrolase
c29805_g1	230	--	--	--	--	--	--	--	--	--	--	--	--	--	--	--	--	--	--	--	--	--	--	--	--	--	--	--	--
c12895_g1	297	--	--	--	--	--	--	--	--	--	--	--	--	--	--	--	--	--	--	--	--	--	--	--	--	--	--	--	--
c49119_g2	768	--	--	--	--	--	--	--	--	--	--	--	--	--	--	--	--	--	--	--	--	--	--	--	--	--	--	--	--
c36526_g1	2599	--	--	--	--	--	--	--	--	--	--	--	--	--	--	--	--	--	--	--	--	--	--	--	--	--	--	--	--
c12602_g1	230	57506568	BAD86655.1	234	1.00478e-20	reverse transcriptase [Bombyx mori]	--	--	--	--	--	--	--	--	--	--	--	--	--	--	--	GO:0006278//GO:0015074	RNA-dependent DNA replication//DNA integration	GO:0003723//GO:0008270//GO:0003964	RNA binding//zinc ion binding//RNA-directed DNA polymerase activity	--	--	--	--
c52496_g1	1337	7638425	AAF65467.1	250	1.31054e-21	death-associated small cytoplasmic leucine-rich protein SCLP [Manduca sexta]	--	--	--	--	--	--	--	--	--	--	--	--	--	--	--	--	--	--	--	--	--	--	--
c83369_g1	266	607361779	EZA56050.1	149	2.42009e-10	hypothetical protein X777_03875 [Cerapachys biroi]	--	--	--	--	--	--	--	--	--	--	--	--	--	--	--	--	--	--	--	--	--	--	--
c23636_g1	215	--	--	--	--	--	--	--	--	--	--	--	--	--	--	--	--	--	--	--	--	--	--	--	--	--	--	--	--
c4702_g1	233	--	--	--	--	--	--	--	--	--	--	--	--	--	--	--	--	--	--	--	--	--	--	--	--	--	--	--	--
c87845_g1	204	--	--	--	--	--	--	--	--	--	--	--	--	--	--	--	--	--	--	--	--	--	--	--	--	--	--	--	--
c49851_g1	2598	--	--	--	--	--	--	--	--	--	--	--	--	--	--	--	--	--	--	--	--	--	--	--	--	--	--	--	--
c6874_g1	284	--	--	--	--	--	--	--	--	--	--	--	--	--	--	--	--	--	--	--	--	--	--	--	--	--	--	--	--
c78489_g1	322	--	--	--	--	--	--	--	--	--	--	--	--	--	--	--	--	--	--	--	--	--	--	--	--	--	--	--	--
c205_g1	202	--	--	--	--	--	--	--	--	--	--	--	--	--	--	--	--	--	--	--	--	--	--	--	--	--	--	--	--
c16340_g1	283	--	--	--	--	--	--	--	--	--	--	--	--	--	--	--	--	--	--	--	--	--	--	--	--	--	--	--	--
c61948_g1	575	--	--	--	--	--	--	--	--	--	--	--	--	--	--	--	--	--	--	--	--	--	--	--	--	--	--	--	--
c45642_g1	775	--	--	--	--	--	--	--	--	--	--	--	--	--	--	--	--	--	--	--	--	--	--	--	--	--	--	--	--
c67717_g1	859	512919236	XP_004929325.1	1024	2.28831e-123	PREDICTED: uncharacterized protein LOC101746914 [Bombyx mori]	--	--	--	--	--	--	--	--	--	--	--	--	--	PF03898	Satellite tobacco necrosis virus coat protein	--	--	--	--	GO:0019028	viral capsid	--	--
c75963_g1	237	--	--	--	--	--	--	--	--	--	--	--	--	--	--	--	--	--	--	--	--	--	--	--	--	--	--	--	--
c50839_g1	1754	298402915	ADI82777.1	2590	0	fatty-acyl CoA reductase 4 [Ostrinia nubilalis]	298402914	GU808253.1	1382	0	Ostrinia nubilalis strain Z fatty-acyl CoA reductase 4 mRNA, complete cds	K13356	FAR	fatty acyl-CoA reductase	http://www.genome.jp/dbget-bin/www_bget?ko:K13356	A1ZAI5	1104	5.32558e-141	Putative fatty acyl-CoA reductase CG5065 OS=Drosophila melanogaster GN=CG5065 PE=3 SV=1	PF01370//PF04321//PF03015//PF01073//PF02719//PF05700	NAD dependent epimerase/dehydratase family//RmlD substrate binding domain//Male sterility protein//3-beta hydroxysteroid dehydrogenase/isomerase family//Polysaccharide biosynthesis protein//Breast carcinoma amplified sequence 2 (BCAS2)	GO:0055114//GO:0009117//GO:0006397//GO:0030639//GO:0006694//GO:0009225//GO:0019872//GO:0045226//GO:0008207//GO:0044237//GO:0008210//GO:0009058//GO:0008209	oxidation-reduction process//nucleotide metabolic process//mRNA processing//polyketide biosynthetic process//steroid biosynthetic process//nucleotide-sugar metabolic process//streptomycin biosynthetic process//extracellular polysaccharide biosynthetic process//C21-steroid hormone metabolic process//cellular metabolic process//estrogen metabolic process//biosynthetic process//androgen metabolic pr…	GO:0003854//GO:0080019//GO:0003824//GO:0000166//GO:0050662//GO:0016616//GO:0008831	3-beta-hydroxy-delta5-steroid dehydrogenase activity//fatty-acyl-CoA reductase (alcohol-forming) activity//catalytic activity//nucleotide binding//coenzyme binding//oxidoreductase activity, acting on the CH-OH group of donors, NAD or NADP as acceptor//dTDP-4-dehydrorhamnose reductase activity	--	--	KOG1221	Acyl-CoA reductase
c10762_g1	326	--	--	--	--	--	--	--	--	--	--	--	--	--	--	--	--	--	--	--	--	--	--	--	--	--	--	--	--
c3171_g1	1068	--	--	--	--	--	--	--	--	--	--	--	--	--	--	--	--	--	--	--	--	--	--	--	--	--	--	--	--
c79389_g1	372	--	--	--	--	--	--	--	--	--	--	--	--	--	--	--	--	--	--	--	--	--	--	--	--	--	--	--	--
c22510_g1	517	--	--	--	--	--	--	--	--	--	--	--	--	--	--	--	--	--	--	--	--	--	--	--	--	--	--	--	--
c80996_g1	261	--	--	--	--	--	--	--	--	--	--	--	--	--	--	--	--	--	--	--	--	--	--	--	--	--	--	--	--
c65420_g1	489	357622042	EHJ73662.1	624	5.90029e-73	hypothetical protein KGM_01874 [Danaus plexippus]	--	--	--	--	--	--	--	--	--	A1L1R6	351	1.25217e-36	Zinc finger protein 423 OS=Danio rerio GN=znf423 PE=2 SV=1	PF06467//PF05495//PF02892//PF01428//PF00096	MYM-type Zinc finger with FCS sequence motif//CHY zinc finger//BED zinc finger//AN1-like Zinc finger//Zinc finger, C2H2 type	--	--	GO:0003676//GO:0008270//GO:0003677//GO:0046872	nucleic acid binding//zinc ion binding//DNA binding//metal ion binding	GO:0005622	intracellular	KOG1721	FOG: Zn-finger
c86108_g1	300	--	--	--	--	--	--	--	--	--	--	--	--	--	--	--	--	--	--	--	--	--	--	--	--	--	--	--	--
c49717_g1	2371	357614597	EHJ69164.1	1116	2.30176e-142	putative Alpha [Danaus plexippus]	--	--	--	--	--	K14464	FUT-1, FucTC	alpha-1,3-fucosyltransferase	http://www.genome.jp/dbget-bin/www_bget?ko:K14464	P83088	423	1.44587e-43	Alpha-(1,3)-fucosyltransferase C OS=Drosophila melanogaster GN=FucTC PE=2 SV=4	PF04145//PF00852	Ctr copper transporter family//Glycosyltransferase family 10 (fucosyltransferase)	GO:0035434//GO:0006486//GO:0006825//GO:0070085	copper ion transmembrane transport//protein glycosylation//copper ion transport//glycosylation	GO:0008417//GO:0016757//GO:0005375	fucosyltransferase activity//transferase activity, transferring glycosyl groups//copper ion transmembrane transporter activity	GO:0016020//GO:0005794//GO:0016021	membrane//Golgi apparatus//integral component of membrane	KOG2619	Fucosyltransferase
c17647_g1	400	449684768	XP_002161612.2	143	9.08764e-09	PREDICTED: puromycin-sensitive aminopeptidase-like, partial [Hydra vulgaris]	--	--	--	--	--	--	--	--	--	--	--	--	--	--	--	--	--	--	--	--	--	--	--
c53831_g1	1331	--	--	--	--	--	--	--	--	--	--	--	--	--	--	--	--	--	--	--	--	--	--	--	--	--	--	--	--
c36324_g1	631	--	--	--	--	--	--	--	--	--	--	--	--	--	--	--	--	--	--	--	--	--	--	--	--	--	--	--	--
c41322_g2	395	--	--	--	--	--	--	--	--	--	--	--	--	--	--	--	--	--	--	--	--	--	--	--	--	--	--	--	--
c23838_g1	453	--	--	--	--	--	--	--	--	--	--	--	--	--	--	--	--	--	--	--	--	--	--	--	--	--	--	--	--
c46643_g1	1048	--	--	--	--	--	--	--	--	--	--	--	--	--	--	--	--	--	--	--	--	--	--	--	--	--	--	--	--
c65970_g1	214	--	--	--	--	--	--	--	--	--	--	--	--	--	--	--	--	--	--	--	--	--	--	--	--	--	--	--	--
c12453_g2	238	--	--	--	--	--	--	--	--	--	--	--	--	--	--	--	--	--	--	--	--	--	--	--	--	--	--	--	--
c78768_g1	208	--	--	--	--	--	--	--	--	--	--	--	--	--	--	--	--	--	--	--	--	--	--	--	--	--	--	--	--
c43421_g1	528	--	--	--	--	--	--	--	--	--	--	--	--	--	--	--	--	--	--	--	--	--	--	--	--	--	--	--	--
c18648_g1	595	270016861	EFA13307.1	251	8.51817e-23	hypothetical protein TcasGA2_TC015998 [Tribolium castaneum]	--	--	--	--	--	--	--	--	--	--	--	--	--	--	--	--	--	--	--	--	--	--	--
c55842_g1	1365	357626356	EHJ76475.1	328	2.3266e-29	hypothetical protein KGM_18016 [Danaus plexippus]	--	--	--	--	--	--	--	--	--	--	--	--	--	PF07886	BA14K-like protein	GO:0009405	pathogenesis	--	--	--	--	--	--
c26852_g1	413	--	--	--	--	--	--	--	--	--	--	--	--	--	--	--	--	--	--	--	--	--	--	--	--	--	--	--	--
c41202_g1	337	--	--	--	--	--	--	--	--	--	--	--	--	--	--	--	--	--	--	--	--	--	--	--	--	--	--	--	--
c71816_g1	221	512910641	XP_004927220.1	174	6.07889e-13	PREDICTED: uncharacterized protein LOC101742788 [Bombyx mori]	--	--	--	--	--	--	--	--	--	--	--	--	--	--	--	--	--	--	--	--	--	KOG0619	FOG: Leucine rich repeat
c32882_g1	401	--	--	--	--	--	--	--	--	--	--	--	--	--	--	--	--	--	--	--	--	--	--	--	--	--	--	--	--
c41685_g1	636	--	--	--	--	--	--	--	--	--	--	--	--	--	--	--	--	--	--	--	--	--	--	--	--	--	--	--	--
c58505_g1	232	--	--	--	--	--	--	--	--	--	--	--	--	--	--	--	--	--	--	--	--	--	--	--	--	--	--	--	--
c66354_g1	221	--	--	--	--	--	--	--	--	--	--	--	--	--	--	--	--	--	--	PF05375	Pacifastin inhibitor (LCMII)	--	--	GO:0030414	peptidase inhibitor activity	--	--	--	--
c65454_g1	392	--	--	--	--	--	--	--	--	--	--	--	--	--	--	--	--	--	--	--	--	--	--	--	--	--	--	--	--
c54755_g1	3251	512929159	XP_004931755.1	2022	0	PREDICTED: zinc finger protein 721-like [Bombyx mori]	--	--	--	--	--	--	--	--	--	Q8N9F8	425	2.00215e-42	Zinc finger protein 454 OS=Homo sapiens GN=ZNF454 PE=2 SV=2	PF01828//PF01788//PF03141//PF00096	Peptidase A4 family//PsbJ//Putative S-adenosyl-L-methionine-dependent methyltransferase//Zinc finger, C2H2 type	GO:0006508//GO:0015979	proteolysis//photosynthesis	GO:0008168//GO:0004190//GO:0046872	methyltransferase activity//aspartic-type endopeptidase activity//metal ion binding	GO:0009539//GO:0016020//GO:0009523	photosystem II reaction center//membrane//photosystem II	--	--
c49243_g1	1447	378725092	AFC35299.1	905	2.1355e-115	immunlectin A [Antheraea pernyi]	--	--	--	--	--	--	--	--	--	P26305	209	3.49996e-17	Hemolymph lipopolysaccharide-binding protein OS=Periplaneta americana PE=1 SV=1	PF00059	Lectin C-type domain	--	--	GO:0030246	carbohydrate binding	--	--	--	--
c63461_g1	203	--	--	--	--	--	--	--	--	--	--	--	--	--	--	--	--	--	--	--	--	--	--	--	--	--	--	--	--
c77585_g1	206	--	--	--	--	--	--	--	--	--	--	--	--	--	--	--	--	--	--	--	--	--	--	--	--	--	--	--	--
c27914_g1	279	--	--	--	--	--	--	--	--	--	--	--	--	--	--	--	--	--	--	--	--	--	--	--	--	--	--	--	--
c21707_g1	663	--	--	--	--	--	--	--	--	--	--	--	--	--	--	--	--	--	--	--	--	--	--	--	--	--	--	--	--
c70107_g1	372	--	--	--	--	--	--	--	--	--	--	--	--	--	--	--	--	--	--	--	--	--	--	--	--	--	--	--	--
c20746_g1	270	--	--	--	--	--	--	--	--	--	--	--	--	--	--	--	--	--	--	--	--	--	--	--	--	--	--	--	--
c78070_g1	236	--	--	--	--	--	--	--	--	--	--	--	--	--	--	--	--	--	--	--	--	--	--	--	--	--	--	--	--
c84953_g1	202	--	--	--	--	--	--	--	--	--	--	--	--	--	--	--	--	--	--	--	--	--	--	--	--	--	--	--	--
c17338_g1	330	--	--	--	--	--	--	--	--	--	--	--	--	--	--	--	--	--	--	--	--	--	--	--	--	--	--	--	--
c25231_g1	396	--	--	--	--	--	--	--	--	--	--	--	--	--	--	--	--	--	--	--	--	--	--	--	--	--	--	--	--
c3841_g1	536	--	--	--	--	--	--	--	--	--	--	--	--	--	--	--	--	--	--	--	--	--	--	--	--	--	--	--	--
c37008_g1	396	--	--	--	--	--	--	--	--	--	--	--	--	--	--	--	--	--	--	--	--	--	--	--	--	--	--	--	--
c15032_g1	258	--	--	--	--	--	--	--	--	--	--	--	--	--	--	--	--	--	--	--	--	--	--	--	--	--	--	--	--
c17908_g1	339	--	--	--	--	--	--	--	--	--	--	--	--	--	--	--	--	--	--	--	--	--	--	--	--	--	--	--	--
c8141_g1	1445	323541200	ADX96000.1	717	3.99661e-89	small heat shock protein 19.8 [Cydia pomonella]	310688080	AB568468.1	398	0	Ostrinia nubilalis mRNA for small heat shock protein, similar to Bombyx mori hsp20.1, partial cds, isolate: 2007-04	K09542	CRYAB	crystallin, alpha B	http://www.genome.jp/dbget-bin/www_bget?ko:K09542	P82147	316	2.50919e-32	Protein lethal(2)essential for life OS=Drosophila melanogaster GN=l(2)efl PE=1 SV=1	PF00525	Alpha crystallin A chain, N terminal	GO:0006950//GO:0007423	response to stress//sensory organ development	GO:0005212	structural constituent of eye lens	--	--	KOG3591	Alpha crystallins
c18629_g1	262	--	--	--	--	--	--	--	--	--	--	--	--	--	--	--	--	--	--	--	--	--	--	--	--	--	--	--	--
c36311_g1	827	--	--	--	--	--	--	--	--	--	--	--	--	--	--	--	--	--	--	--	--	--	--	--	--	--	--	--	--
c85151_g1	232	--	--	--	--	--	--	--	--	--	--	--	--	--	--	--	--	--	--	--	--	--	--	--	--	--	--	--	--
c86_g1	269	--	--	--	--	--	--	--	--	--	--	--	--	--	--	--	--	--	--	--	--	--	--	--	--	--	--	--	--
c35928_g1	579	--	--	--	--	--	--	--	--	--	--	--	--	--	--	--	--	--	--	--	--	--	--	--	--	--	--	--	--
c84696_g1	221	112984438	NP_001037168.1	329	1.99138e-33	ovarian serine protease [Bombyx mori] >gi|18157552|gb|AAL62027.1|AF294884_1 ovarian serine protease [Bombyx mori]	--	--	--	--	--	--	--	--	--	P98159	191	1.59651e-16	Serine protease nudel OS=Drosophila melanogaster GN=ndl PE=1 SV=2	PF00057	Low-density lipoprotein receptor domain class A	GO:0007165//GO:0006508	signal transduction//proteolysis	GO:0004252//GO:0005044//GO:0005515	serine-type endopeptidase activity//scavenger receptor activity//protein binding	GO:0016020	membrane	KOG1215	Low-density lipoprotein receptors containing Ca2+-binding EGF-like domains
c41788_g1	571	--	--	--	--	--	--	--	--	--	--	--	--	--	--	--	--	--	--	--	--	--	--	--	--	--	--	--	--
c72698_g1	268	--	--	--	--	--	619325817	FO681374.1	54	8.3797e-18	Spodoptera frugiperda sequence from BAC clone 96D18	--	--	--	--	--	--	--	--	--	--	--	--	--	--	--	--	--	--
c15090_g1	393	--	--	--	--	--	--	--	--	--	--	--	--	--	--	--	--	--	--	--	--	--	--	--	--	--	--	--	--
c41851_g1	2312	512905728	XP_004926017.1	2012	0	PREDICTED: putative fatty acyl-CoA reductase CG5065-like [Bombyx mori]	210063114	EU817393.1	535	0	Ostrinia scapulalis FAR-like protein I mRNA, partial cds	K13356	FAR	fatty acyl-CoA reductase	http://www.genome.jp/dbget-bin/www_bget?ko:K13356	A1ZAI5	935	1.40053e-113	Putative fatty acyl-CoA reductase CG5065 OS=Drosophila melanogaster GN=CG5065 PE=3 SV=1	PF01370//PF04321//PF03015//PF00106//PF01073//PF12409//PF02719	NAD dependent epimerase/dehydratase family//RmlD substrate binding domain//Male sterility protein//short chain dehydrogenase//3-beta hydroxysteroid dehydrogenase/isomerase family//P5-type ATPase cation transporter//Polysaccharide biosynthesis protein	GO:0044237//GO:0006812//GO:0008152//GO:0008207//GO:0008209//GO:0008210//GO:0009058//GO:0006694//GO:0030639//GO:0009117//GO:0055114//GO:0045226//GO:0019872//GO:0009225	cellular metabolic process//cation transport//metabolic process//C21-steroid hormone metabolic process//androgen metabolic process//estrogen metabolic process//biosynthetic process//steroid biosynthetic process//polyketide biosynthetic process//nucleotide metabolic process//oxidation-reduction process//extracellular polysaccharide biosynthetic process//streptomycin biosynthetic process//nucleotid…	GO:0016887//GO:0016616//GO:0008831//GO:0080019//GO:0003854//GO:0050662//GO:0016491//GO:0003824	ATPase activity//oxidoreductase activity, acting on the CH-OH group of donors, NAD or NADP as acceptor//dTDP-4-dehydrorhamnose reductase activity//fatty-acyl-CoA reductase (alcohol-forming) activity//3-beta-hydroxy-delta5-steroid dehydrogenase activity//coenzyme binding//oxidoreductase activity//catalytic activity	GO:0016021	integral component of membrane	KOG1221	Acyl-CoA reductase
c42833_g1	687	357625401	EHJ75860.1	146	1.37895e-09	hypothetical protein KGM_17994 [Danaus plexippus]	--	--	--	--	--	--	--	--	--	--	--	--	--	--	--	--	--	--	--	--	--	--	--
c49237_g1	1753	512913027	XP_004927800.1	375	8.73961e-35	PREDICTED: A-agglutinin anchorage subunit-like [Bombyx mori]	--	--	--	--	--	--	--	--	--	--	--	--	--	PF04096	Nucleoporin autopeptidase	GO:0006810	transport	--	--	GO:0005643	nuclear pore	--	--
c51274_g4	626	357609881	EHJ66730.1	490	4.52486e-55	putative DNA-binding protein Ewg [Danaus plexippus]	512896272	XM_004923814.1	173	1.48416e-83	PREDICTED: Bombyx mori DNA-binding protein P3A2-like (LOC101738034), mRNA	K11831	NRF1	nuclear respiratory factor 1	http://www.genome.jp/dbget-bin/www_bget?ko:K11831	Q24312	235	6.87758e-21	DNA-binding protein Ewg OS=Drosophila melanogaster GN=ewg PE=1 SV=2	--	--	--	--	GO:0003677	DNA binding	--	--	--	--
c29482_g1	472	--	--	--	--	--	--	--	--	--	--	--	--	--	--	--	--	--	--	--	--	--	--	--	--	--	--	--	--
c66338_g1	208	--	--	--	--	--	--	--	--	--	--	--	--	--	--	--	--	--	--	--	--	--	--	--	--	--	--	--	--
c82010_g1	267	--	--	--	--	--	--	--	--	--	--	--	--	--	--	--	--	--	--	--	--	--	--	--	--	--	--	--	--
c63572_g1	604	--	--	--	--	--	--	--	--	--	--	--	--	--	--	--	--	--	--	--	--	--	--	--	--	--	--	--	--
c39860_g1	404	--	--	--	--	--	--	--	--	--	--	--	--	--	--	--	--	--	--	--	--	--	--	--	--	--	--	--	--
c51401_g1	4034	512901660	XP_004925190.1	3312	0	PREDICTED: calpain-7-like [Bombyx mori]	--	--	--	--	--	K08576	CAPN7	calpain-7	http://www.genome.jp/dbget-bin/www_bget?ko:K08576	Q9Y6W3	2048	0	Calpain-7 OS=Homo sapiens GN=CAPN7 PE=1 SV=1	PF00515//PF13176//PF00648	Tetratricopeptide repeat//Tetratricopeptide repeat//Calpain family cysteine protease	GO:0006508	proteolysis	GO:0004198//GO:0005515	calcium-dependent cysteine-type endopeptidase activity//protein binding	GO:0005622	intracellular	KOG0045	Cytosolic Ca2+-dependent cysteine protease (calpain), large subunit (EF-Hand protein superfamily)
c62851_g1	1143	238482119	XP_002372298.1	1765	0	short chain dehydrogenase/reductase family [Aspergillus flavus NRRL3357] >gi|220700348|gb|EED56686.1| short chain dehydrogenase/reductase family [Aspergillus flavus NRRL3357]	317139068	XM_001817199.2	953	0	Aspergillus oryzae RIB40 short-chain dehydrogenase, mRNA	--	--	--	--	Q9RPT1	358	6.06243e-38	Rhamnolipids biosynthesis 3-oxoacyl-[acyl-carrier-protein] reductase OS=Pseudomonas aeruginosa (strain ATCC 15692 / PAO1 / 1C / PRS 101 / LMG 12228) GN=rhlG PE=1 SV=1	PF02118//PF01370//PF00107//PF08057//PF02719//PF00106	Srg family chemoreceptor//NAD dependent epimerase/dehydratase family//Zinc-binding dehydrogenase//Erythromycin resistance leader peptide//Polysaccharide biosynthesis protein//short chain dehydrogenase	GO:0046677//GO:0007606//GO:0009058//GO:0044237//GO:0007165//GO:0008152//GO:0055114	response to antibiotic//sensory perception of chemical stimulus//biosynthetic process//cellular metabolic process//signal transduction//metabolic process//oxidation-reduction process	GO:0004888//GO:0050662//GO:0000166//GO:0016491//GO:0008270//GO:0003824	transmembrane signaling receptor activity//coenzyme binding//nucleotide binding//oxidoreductase activity//zinc ion binding//catalytic activity	GO:0016020	membrane	KOG0725	Reductases with broad range of substrate specificities
c65799_g1	440	--	--	--	--	--	--	--	--	--	--	--	--	--	--	--	--	--	--	--	--	--	--	--	--	--	--	--	--
c65112_g1	224	--	--	--	--	--	--	--	--	--	--	--	--	--	--	--	--	--	--	--	--	--	--	--	--	--	--	--	--
c54852_g1	4799	512936016	XP_004933416.1	2632	0	PREDICTED: dystroglycan-like isoform X4 [Bombyx mori]	512936019	XR_210091.1	490	0	PREDICTED: Bombyx mori dystroglycan-like (LOC101746167), transcript variant X6, misc_RNA	K06265	DAG1	dystroglycan 1	http://www.genome.jp/dbget-bin/www_bget?ko:K06265	Q9TSZ6	421	2.18141e-40	Dystroglycan OS=Canis familiaris GN=DAG1 PE=3 SV=1	PF05454	Dystroglycan (Dystrophin-associated glycoprotein 1)	GO:0007016	cytoskeletal anchoring at plasma membrane	--	--	GO:0016010	dystrophin-associated glycoprotein complex	KOG3781	Dystroglycan
c55366_g1	326	--	--	--	--	--	--	--	--	--	--	--	--	--	--	--	--	--	--	--	--	--	--	--	--	--	--	--	--
c79465_g1	419	--	--	--	--	--	--	--	--	--	--	--	--	--	--	--	--	--	--	--	--	--	--	--	--	--	--	--	--
c13164_g1	296	--	--	--	--	--	--	--	--	--	--	--	--	--	--	--	--	--	--	--	--	--	--	--	--	--	--	--	--
c2079_g1	786	343481902	AEM44816.1	493	8.00323e-56	zinc finger DNA binding protein [Pectinophora gossypiella]	--	--	--	--	--	--	--	--	--	--	--	--	--	PF07851//PF06008//PF08702//PF07926//PF04111	TMPIT-like protein//Laminin Domain I//Fibrinogen alpha/beta chain family//TPR/MLP1/MLP2-like protein//Autophagy protein Apg6	GO:0030155//GO:0007165//GO:0030168//GO:0045995//GO:0006914//GO:0006606//GO:0030334//GO:0051258	regulation of cell adhesion//signal transduction//platelet activation//regulation of embryonic development//autophagy//protein import into nucleus//regulation of cell migration//protein polymerization	GO:0005102//GO:0030674	receptor binding//protein binding, bridging	GO:0016021//GO:0005577//GO:0005606//GO:0005643	integral component of membrane//fibrinogen complex//laminin-1 complex//nuclear pore	--	--
c44308_g1	1689	--	--	--	--	--	--	--	--	--	--	--	--	--	--	--	--	--	--	--	--	--	--	--	--	--	--	--	--
c51366_g1	470	298204333	ADI61815.1	133	1.08127e-06	endonuclease-reverse transcriptase [Bombyx mori]	--	--	--	--	--	--	--	--	--	--	--	--	--	--	--	--	--	--	--	--	--	--	--
c82327_g1	222	--	--	--	--	--	--	--	--	--	--	--	--	--	--	--	--	--	--	--	--	--	--	--	--	--	--	--	--
c61529_g1	913	--	--	--	--	--	--	--	--	--	--	--	--	--	--	--	--	--	--	--	--	--	--	--	--	--	--	--	--
c62359_g1	520	--	--	--	--	--	--	--	--	--	--	--	--	--	--	--	--	--	--	--	--	--	--	--	--	--	--	--	--
c79371_g1	306	--	--	--	--	--	--	--	--	--	--	--	--	--	--	--	--	--	--	--	--	--	--	--	--	--	--	--	--
c86677_g1	276	--	--	--	--	--	--	--	--	--	--	--	--	--	--	--	--	--	--	--	--	--	--	--	--	--	--	--	--
c5409_g1	282	--	--	--	--	--	--	--	--	--	--	--	--	--	--	--	--	--	--	--	--	--	--	--	--	--	--	--	--
c62485_g1	283	--	--	--	--	--	--	--	--	--	--	--	--	--	--	--	--	--	--	--	--	--	--	--	--	--	--	--	--
c40874_g1	947	512920077	XP_004929542.1	487	2.54059e-52	PREDICTED: putative fatty acyl-CoA reductase CG5065-like [Bombyx mori]	--	--	--	--	--	--	--	--	--	Q95SX7	275	3.7813e-25	Probable RNA-directed DNA polymerase from transposon BS OS=Drosophila melanogaster GN=RTase PE=2 SV=1	PF00078	Reverse transcriptase (RNA-dependent DNA polymerase)	GO:0006278	RNA-dependent DNA replication	GO:0003964//GO:0003723	RNA-directed DNA polymerase activity//RNA binding	--	--	--	--
c27563_g1	780	--	--	--	--	--	--	--	--	--	--	--	--	--	--	--	--	--	--	--	--	--	--	--	--	--	--	--	--
c67969_g1	339	--	--	--	--	--	--	--	--	--	--	--	--	--	--	--	--	--	--	--	--	--	--	--	--	--	--	--	--
c20801_g1	363	--	--	--	--	--	--	--	--	--	--	--	--	--	--	--	--	--	--	PF12861	Anaphase-promoting complex subunit 11 RING-H2 finger	GO:0016567	protein ubiquitination	GO:0004842	ubiquitin-protein transferase activity	GO:0005680	anaphase-promoting complex	--	--
c48540_g1	1456	--	--	--	--	--	--	--	--	--	--	--	--	--	--	--	--	--	--	PF00116	Cytochrome C oxidase subunit II, periplasmic domain	GO:0006123//GO:0015992	mitochondrial electron transport, cytochrome c to oxygen//proton transport	GO:0005507//GO:0004129	copper ion binding//cytochrome-c oxidase activity	GO:0045277//GO:0016020	respiratory chain complex IV//membrane	--	--
c55331_g1	3734	157804574	ABV79901.1	3057	0	hexosaminidase [Ostrinia furnacalis]	157804573	EU158179.1	1935	0	Ostrinia furnacalis hexosaminidase mRNA, complete cds	K12373	HEXA_B	hexosaminidase	http://www.genome.jp/dbget-bin/www_bget?ko:K12373	P49010	964	3.89126e-114	Chitooligosaccharidolytic beta-N-acetylglucosaminidase OS=Bombyx mori PE=1 SV=1	PF00728//PF04083	Glycosyl hydrolase family 20, catalytic domain//Partial alpha/beta-hydrolase lipase region	GO:0005975//GO:0001575//GO:0006040//GO:0006629//GO:0006027	carbohydrate metabolic process//globoside metabolic process//amino sugar metabolic process//lipid metabolic process//glycosaminoglycan catabolic process	GO:0043169//GO:0004563//GO:0004553	cation binding//beta-N-acetylhexosaminidase activity//hydrolase activity, hydrolyzing O-glycosyl compounds	--	--	KOG2499	Beta-N-acetylhexosaminidase
c80532_g1	265	--	--	--	--	--	--	--	--	--	--	--	--	--	--	--	--	--	--	--	--	--	--	--	--	--	--	--	--
c51345_g1	2839	357630059	EHJ78450.1	1695	0	hypothetical protein KGM_16292 [Danaus plexippus]	194898864	XM_001978947.1	58	5.94355e-19	Drosophila erecta GG10877 (Dere\GG10877), mRNA	K00974	cca	tRNA nucleotidyltransferase (CCA-adding enzyme)	http://www.genome.jp/dbget-bin/www_bget?ko:K00974	Q8K1J6	1102	7.21592e-139	CCA tRNA nucleotidyltransferase 1, mitochondrial OS=Mus musculus GN=Trnt1 PE=1 SV=1	PF00643//PF04900//PF07739//PF02318//PF01743//PF01363//PF01485//PF03850//PF14634	B-box zinc finger//Fcf1//TipAS antibiotic-recognition domain//FYVE-type zinc finger//Poly A polymerase head domain//FYVE zinc finger//IBR domain//Transcription factor Tfb4//zinc-RING finger domain	GO:0006289//GO:0006886//GO:0006355//GO:0042780//GO:0006396//GO:0045892	nucleotide-excision repair//intracellular protein transport//regulation of transcription, DNA-templated//tRNA 3'-end processing//RNA processing//negative regulation of transcription, DNA-templated	GO:0003677//GO:0046872//GO:0009022//GO:0003723//GO:0016779//GO:0005515//GO:0008270//GO:0017137	DNA binding//metal ion binding//tRNA nucleotidyltransferase activity//RNA binding//nucleotidyltransferase activity//protein binding//zinc ion binding//Rab GTPase binding	GO:0005739//GO:0032040//GO:0000439//GO:0005622	mitochondrion//small-subunit processome//core TFIIH complex//intracellular	KOG2159	tRNA nucleotidyltransferase/poly(A) polymerase
c49423_g1	1983	357621792	EHJ73504.1	1083	6.22634e-136	C-type lectin 17 [Danaus plexippus]	--	--	--	--	--	--	--	--	--	Q5HZI9	568	2.37986e-65	Solute carrier family 25 member 51 OS=Mus musculus GN=Slc25a51 PE=2 SV=1	--	--	GO:0006810	transport	GO:0030246	carbohydrate binding	GO:0016021	integral component of membrane	KOG1519	Predicted mitochondrial carrier protein
c64731_g1	211	607347805	EZA46391.1	170	2.85285e-13	THAP domain-containing protein [Cerapachys biroi]	--	--	--	--	--	--	--	--	--	Q9H5L6	137	1.41774e-09	DNA transposase THAP9 OS=Homo sapiens GN=THAP9 PE=1 SV=2	--	--	--	--	--	--	--	--	--	--
c592_g1	375	--	--	--	--	--	--	--	--	--	--	--	--	--	--	--	--	--	--	--	--	--	--	--	--	--	--	--	--
c25790_g1	452	268306494	ACY95368.1	585	7.37905e-75	ribosomal protein L34 [Manduca sexta]	268306493	GU084335.1	251	4.57805e-127	Manduca sexta ribosomal protein L34 (rpl34) mRNA, complete cds	K02915	RP-L34e, RPL34	large subunit ribosomal protein L34e	http://www.genome.jp/dbget-bin/www_bget?ko:K02915	P45842	434	2.14276e-53	60S ribosomal protein L34 OS=Aedes albopictus GN=RpL34 PE=2 SV=2	PF01199//PF01363	Ribosomal protein L34e//FYVE zinc finger	GO:0042254//GO:0006412	ribosome biogenesis//translation	GO:0046872//GO:0003735	metal ion binding//structural constituent of ribosome	GO:0005622//GO:0005840	intracellular//ribosome	KOG1790	60s ribosomal protein L34
c66631_g1	294	--	--	--	--	--	--	--	--	--	--	--	--	--	--	--	--	--	--	--	--	--	--	--	--	--	--	--	--
c32212_g1	234	--	--	--	--	--	--	--	--	--	--	--	--	--	--	--	--	--	--	--	--	--	--	--	--	--	--	--	--
c41724_g1	374	--	--	--	--	--	--	--	--	--	--	--	--	--	--	--	--	--	--	--	--	--	--	--	--	--	--	--	--
c34271_g1	716	--	--	--	--	--	--	--	--	--	--	--	--	--	--	--	--	--	--	--	--	--	--	--	--	--	--	--	--
c63814_g1	276	--	--	--	--	--	--	--	--	--	--	--	--	--	--	--	--	--	--	--	--	--	--	--	--	--	--	--	--
c87694_g1	270	--	--	--	--	--	--	--	--	--	--	--	--	--	--	--	--	--	--	--	--	--	--	--	--	--	--	--	--
c81140_g1	218	--	--	--	--	--	--	--	--	--	--	--	--	--	--	--	--	--	--	--	--	--	--	--	--	--	--	--	--
c75478_g1	422	270016861	EFA13307.1	209	1.13188e-17	hypothetical protein TcasGA2_TC015998 [Tribolium castaneum]	--	--	--	--	--	--	--	--	--	--	--	--	--	--	--	--	--	--	--	--	--	--	--
c56027_g1	5856	357601730	EHJ63136.1	6516	0	hypothetical protein KGM_12763 [Danaus plexippus]	--	--	--	--	--	--	--	--	--	F6WXT2	732	1.51528e-76	Nucleoporin NUP188 homolog OS=Xenopus tropicalis GN=nup188 PE=2 SV=1	--	--	GO:0043087//GO:0035023	regulation of GTPase activity//regulation of Rho protein signal transduction	GO:0005089//GO:0005543	Rho guanyl-nucleotide exchange factor activity//phospholipid binding	GO:0005622	intracellular	--	--
c49893_g1	3454	357613483	EHJ68534.1	2765	0	hypothetical protein KGM_17144 [Danaus plexippus]	--	--	--	--	--	--	--	--	--	Q7QH73	887	5.38005e-102	Chorion peroxidase OS=Anopheles gambiae GN=pxt PE=2 SV=3	PF03098//PF00376	Animal haem peroxidase//MerR family regulatory protein	GO:0006355//GO:0006804//GO:0006979//GO:0055114	regulation of transcription, DNA-templated//peroxidase reaction//response to oxidative stress//oxidation-reduction process	GO:0004601//GO:0003677//GO:0020037	peroxidase activity//DNA binding//heme binding	--	--	KOG2408	Peroxidase/oxygenase
c2745_g1	217	--	--	--	--	--	--	--	--	--	--	--	--	--	--	--	--	--	--	--	--	--	--	--	--	--	--	--	--
c82308_g1	250	--	--	--	--	--	--	--	--	--	--	--	--	--	--	--	--	--	--	--	--	--	--	--	--	--	--	--	--
c74414_g1	494	449674150	XP_004208112.1	212	8.78007e-17	PREDICTED: uncharacterized protein LOC101235092 [Hydra vulgaris]	--	--	--	--	--	--	--	--	--	--	--	--	--	--	--	--	--	--	--	--	--	--	--
c37944_g1	340	--	--	--	--	--	--	--	--	--	--	--	--	--	--	--	--	--	--	--	--	--	--	--	--	--	--	--	--
c44692_g1	451	--	--	--	--	--	--	--	--	--	--	--	--	--	--	--	--	--	--	--	--	--	--	--	--	--	--	--	--
c74320_g1	493	512920847	XP_004929735.1	155	6.41981e-10	PREDICTED: forkhead box protein C1-like [Bombyx mori]	--	--	--	--	--	--	--	--	--	--	--	--	--	--	--	--	--	--	--	--	--	--	--
c63408_g1	662	--	--	--	--	--	--	--	--	--	--	--	--	--	--	--	--	--	--	--	--	--	--	--	--	--	--	--	--
c36801_g1	293	--	--	--	--	--	--	--	--	--	--	--	--	--	--	--	--	--	--	--	--	--	--	--	--	--	--	--	--
c63121_g1	401	--	--	--	--	--	--	--	--	--	--	--	--	--	--	--	--	--	--	--	--	--	--	--	--	--	--	--	--
c74509_g1	549	--	--	--	--	--	--	--	--	--	--	--	--	--	--	--	--	--	--	--	--	--	--	--	--	--	--	--	--
c53218_g1	2385	512927649	XP_004931387.1	899	4.53626e-117	PREDICTED: putative nuclease HARBI1-like [Bombyx mori]	512927648	XM_004931330.1	489	0	PREDICTED: Bombyx mori putative nuclease HARBI1-like (LOC101739557), mRNA	--	--	--	--	Q96MB7	274	2.29024e-25	Putative nuclease HARBI1 OS=Homo sapiens GN=HARBI1 PE=1 SV=1	PF00249	Myb-like DNA-binding domain	--	--	GO:0003682	chromatin binding	GO:0000785	chromatin	--	--
c24318_g1	846	--	--	--	--	--	--	--	--	--	--	--	--	--	--	--	--	--	--	--	--	--	--	--	--	--	--	--	--
c43267_g1	519	--	--	--	--	--	--	--	--	--	--	--	--	--	--	--	--	--	--	--	--	--	--	--	--	--	--	--	--
c75364_g1	275	--	--	--	--	--	--	--	--	--	--	--	--	--	--	--	--	--	--	--	--	--	--	--	--	--	--	--	--
c50718_g1	1863	357623515	EHJ74630.1	1010	1.85007e-128	hypothetical protein KGM_18205 [Danaus plexippus]	--	--	--	--	--	K00884	NAGK, nagK	N-acetylglucosamine kinase	http://www.genome.jp/dbget-bin/www_bget?ko:K00884	P81799	576	3.89674e-66	N-acetyl-D-glucosamine kinase OS=Rattus norvegicus GN=Nagk PE=1 SV=4	--	--	--	--	--	--	--	--	--	--
c53472_g2	266	512931821	XP_004932395.1	205	6.6595e-17	PREDICTED: protein scarlet-like [Bombyx mori]	--	--	--	--	--	--	--	--	--	--	--	--	--	--	--	--	--	--	--	--	--	--	--
c64338_g1	248	--	--	--	--	--	--	--	--	--	--	--	--	--	--	--	--	--	--	--	--	--	--	--	--	--	--	--	--
c39855_g2	562	357622535	EHJ73970.1	316	2.32795e-31	cuticular protein glycine-rich 13 [Danaus plexippus]	346714606	AK386781.1	253	4.46815e-128	Bombyx mori mRNA, clone: an--00375_K00411	--	--	--	--	--	--	--	--	--	--	--	--	--	--	--	--	--	--
c46934_g2	748	--	--	--	--	--	--	--	--	--	--	--	--	--	--	--	--	--	--	--	--	--	--	--	--	--	--	--	--
c74797_g1	277	512909986	XP_004927056.1	449	7.61641e-51	PREDICTED: kinesin-like protein KIF19-like [Bombyx mori]	--	--	--	--	--	K10401	KIF18_19	kinesin family member 18/19	http://www.genome.jp/dbget-bin/www_bget?ko:K10401	Q7ZXX2	263	6.01862e-26	Kinesin-like protein KIF19 OS=Xenopus laevis GN=kif19 PE=2 SV=1	PF00225	Kinesin motor domain	GO:0007017//GO:0007018	microtubule-based process//microtubule-based movement	GO:0005524//GO:0003777//GO:0008017	ATP binding//microtubule motor activity//microtubule binding	GO:0005874//GO:0045298	microtubule//tubulin complex	KOG0242	Kinesin-like protein
c21703_g1	414	--	--	--	--	--	--	--	--	--	--	--	--	--	--	--	--	--	--	--	--	--	--	--	--	--	--	--	--
c63522_g1	438	--	--	--	--	--	--	--	--	--	--	--	--	--	--	--	--	--	--	--	--	--	--	--	--	--	--	--	--
c40627_g1	2481	148298871	NP_001091802.1	967	1.04809e-121	uncharacterized protein LOC778507 [Bombyx mori] >gi|116272507|gb|ABJ97189.1| hypothetical protein [Bombyx mori]	665810764	XM_008555596.1	78	3.95171e-30	PREDICTED: Microplitis demolitor uncharacterized protein C9orf78 (LOC103575714), mRNA	--	--	--	--	Q9NZ63	596	1.74085e-68	Uncharacterized protein C9orf78 OS=Homo sapiens GN=C9orf78 PE=1 SV=1	--	--	--	--	--	--	--	--	KOG3345	Uncharacterized conserved protein
c82491_g1	227	--	--	--	--	--	--	--	--	--	--	--	--	--	--	--	--	--	--	--	--	--	--	--	--	--	--	--	--
c42065_g1	436	--	--	--	--	--	--	--	--	--	--	--	--	--	--	--	--	--	--	--	--	--	--	--	--	--	--	--	--
c21736_g1	717	--	--	--	--	--	--	--	--	--	--	--	--	--	--	--	--	--	--	--	--	--	--	--	--	--	--	--	--
c62402_g1	1202	--	--	--	--	--	--	--	--	--	--	--	--	--	--	--	--	--	--	--	--	--	--	--	--	--	--	--	--
c41798_g1	522	--	--	--	--	--	--	--	--	--	--	--	--	--	--	--	--	--	--	--	--	--	--	--	--	--	--	--	--
c81641_g1	209	--	--	--	--	--	--	--	--	--	--	--	--	--	--	--	--	--	--	--	--	--	--	--	--	--	--	--	--
c46655_g1	244	--	--	--	--	--	--	--	--	--	--	--	--	--	--	--	--	--	--	--	--	--	--	--	--	--	--	--	--
c88947_g1	241	--	--	--	--	--	--	--	--	--	--	--	--	--	--	--	--	--	--	--	--	--	--	--	--	--	--	--	--
c15474_g1	366	512923295	XP_004930320.1	407	3.11119e-44	PREDICTED: potassium voltage-gated channel subfamily KQT member 5-like [Bombyx mori]	--	--	--	--	--	--	--	--	--	--	--	--	--	--	--	--	--	--	--	--	--	--	--
c55894_g4	306	512927779	XP_004931420.1	171	4.35174e-12	PREDICTED: probable DNA mismatch repair protein Msh6-like [Bombyx mori]	--	--	--	--	--	--	--	--	--	--	--	--	--	--	--	--	--	--	--	--	--	--	--
c53351_g1	3342	646713974	KDR18111.1	3032	0	Dynamin-1-like protein [Zootermopsis nevadensis]	158299537	XM_319643.4	313	1.23509e-160	Anopheles gambiae str. PEST AGAP008896-PA (AgaP_AGAP008896) mRNA, complete cds	K17065	DNM1L	dynamin 1-like protein	http://www.genome.jp/dbget-bin/www_bget?ko:K17065	O00429	2530	0	Dynamin-1-like protein OS=Homo sapiens GN=DNM1L PE=1 SV=2	PF08477//PF01926//PF02212//PF00350//PF01031//PF04513//PF07355	Miro-like protein//50S ribosome-binding GTPase//Dynamin GTPase effector domain//Dynamin family//Dynamin central region//Baculovirus polyhedron envelope protein, PEP, C terminus//Glycine/sarcosine/betaine reductase selenoprotein B (GRDB)	GO:0055114//GO:0007264	oxidation-reduction process//small GTPase mediated signal transduction	GO:0050485//GO:0005198//GO:0030699//GO:0003924//GO:0005525	oxidoreductase activity, acting on X-H and Y-H to form an X-Y bond, with a disulfide as acceptor//structural molecule activity//glycine reductase activity//GTPase activity//GTP binding	GO:0030700//GO:0019028//GO:0019031//GO:0005622	glycine reductase complex//viral capsid//viral envelope//intracellular	KOG0446	Vacuolar sorting protein VPS1, dynamin, and related proteins
c81335_g1	570	238492829	XP_002377651.1	807	6.64862e-104	conserved hypothetical protein [Aspergillus flavus NRRL3357] >gi|220696145|gb|EED52487.1| conserved hypothetical protein [Aspergillus flavus NRRL3357] >gi|391873743|gb|EIT82751.1| hypothetical protein Ao3042_00047 [Aspergillus oryzae 3.042] >gi|635512705|gb|KDE84570.1| hypothetical protein AO1008_11262 [Aspergillus oryzae 100-8]	238492828	XM_002377610.1	432	0	Aspergillus flavus NRRL3357 conserved hypothetical protein, mRNA	--	--	--	--	--	--	--	--	--	--	--	--	--	--	--	--	--	--
c83819_g1	216	--	--	--	--	--	--	--	--	--	--	--	--	--	--	--	--	--	--	--	--	--	--	--	--	--	--	--	--
c35453_g1	639	--	--	--	--	--	--	--	--	--	--	--	--	--	--	--	--	--	--	--	--	--	--	--	--	--	--	--	--
c76191_g1	331	--	--	--	--	--	--	--	--	--	--	--	--	--	--	--	--	--	--	--	--	--	--	--	--	--	--	--	--
c59324_g1	265	--	--	--	--	--	--	--	--	--	--	--	--	--	--	--	--	--	--	--	--	--	--	--	--	--	--	--	--
c46586_g2	323	--	--	--	--	--	--	--	--	--	--	--	--	--	--	--	--	--	--	--	--	--	--	--	--	--	--	--	--
c70251_g1	267	--	--	--	--	--	--	--	--	--	--	--	--	--	--	--	--	--	--	--	--	--	--	--	--	--	--	--	--
c18535_g1	374	--	--	--	--	--	--	--	--	--	--	--	--	--	--	--	--	--	--	--	--	--	--	--	--	--	--	--	--
c7678_g1	202	--	--	--	--	--	--	--	--	--	--	--	--	--	--	--	--	--	--	--	--	--	--	--	--	--	--	--	--
c83815_g1	392	--	--	--	--	--	--	--	--	--	--	--	--	--	--	--	--	--	--	--	--	--	--	--	--	--	--	--	--
c75490_g1	348	--	--	--	--	--	--	--	--	--	--	--	--	--	--	--	--	--	--	--	--	--	--	--	--	--	--	--	--
c53137_g1	2082	--	--	--	--	--	--	--	--	--	--	--	--	--	--	--	--	--	--	--	--	--	--	--	--	--	--	--	--
c42365_g1	742	357611493	EHJ67514.1	565	3.61159e-65	hypothetical protein KGM_13045 [Danaus plexippus]	--	--	--	--	--	--	--	--	--	B3M8G0	295	1.25427e-28	Protein cueball OS=Drosophila ananassae GN=cue PE=3 SV=1	PF04277	Oxaloacetate decarboxylase, gamma chain	GO:0071436//GO:0006560//GO:0006814//GO:0006525//GO:0006090	sodium ion export//proline metabolic process//sodium ion transport//arginine metabolic process//pyruvate metabolic process	GO:0008948//GO:0015081	oxaloacetate decarboxylase activity//sodium ion transmembrane transporter activity	GO:0016020	membrane	KOG1215	Low-density lipoprotein receptors containing Ca2+-binding EGF-like domains
c81355_g1	259	--	--	--	--	--	--	--	--	--	--	--	--	--	--	--	--	--	--	--	--	--	--	--	--	--	--	--	--
c40528_g1	364	--	--	--	--	--	--	--	--	--	--	--	--	--	--	--	--	--	--	--	--	--	--	--	--	--	--	--	--
c63816_g1	270	--	--	--	--	--	--	--	--	--	--	--	--	--	--	--	--	--	--	--	--	--	--	--	--	--	--	--	--
c39077_g1	887	357603434	EHJ63764.1	222	1.04913e-18	hypothetical protein KGM_03164 [Danaus plexippus]	--	--	--	--	--	--	--	--	--	--	--	--	--	--	--	--	--	--	--	--	--	--	--
c35391_g1	1093	--	--	--	--	--	--	--	--	--	--	--	--	--	--	--	--	--	--	PF12125	D domain of beta-TrCP	--	--	GO:0046983	protein dimerization activity	--	--	--	--
c16734_g1	403	--	--	--	--	--	--	--	--	--	--	--	--	--	--	--	--	--	--	--	--	--	--	--	--	--	--	--	--
c62873_g1	282	--	--	--	--	--	--	--	--	--	--	--	--	--	--	--	--	--	--	--	--	--	--	--	--	--	--	--	--
c48732_g1	332	--	--	--	--	--	--	--	--	--	--	--	--	--	--	--	--	--	--	--	--	--	--	--	--	--	--	--	--
c37951_g2	886	70907196	AAZ15239.1	402	3.83992e-41	reverse transcriptase [Aedes aegypti]	--	--	--	--	--	--	--	--	--	P16423	159	1.29145e-10	Retrovirus-related Pol polyprotein from type-2 retrotransposable element R2DM OS=Drosophila melanogaster GN=pol PE=4 SV=1	PF00078	Reverse transcriptase (RNA-dependent DNA polymerase)	GO:0006278	RNA-dependent DNA replication	GO:0003723//GO:0003964	RNA binding//RNA-directed DNA polymerase activity	--	--	KOG1075	FOG: Reverse transcriptase
c48912_g6	397	--	--	--	--	--	--	--	--	--	--	--	--	--	--	--	--	--	--	--	--	--	--	--	--	--	--	--	--
c5414_g1	369	--	--	--	--	--	--	--	--	--	--	--	--	--	--	--	--	--	--	--	--	--	--	--	--	--	--	--	--
c44086_g1	800	--	--	--	--	--	--	--	--	--	--	--	--	--	--	--	--	--	--	--	--	--	--	--	--	--	--	--	--
c79504_g1	225	--	--	--	--	--	--	--	--	--	--	--	--	--	--	--	--	--	--	--	--	--	--	--	--	--	--	--	--
c43925_g1	531	--	--	--	--	--	--	--	--	--	--	--	--	--	--	--	--	--	--	--	--	--	--	--	--	--	--	--	--
c43323_g1	686	--	--	--	--	--	--	--	--	--	--	--	--	--	--	--	--	--	--	--	--	--	--	--	--	--	--	--	--
c51285_g3	1232	512908649	XP_004926733.1	1047	2.28748e-138	PREDICTED: zinc finger protein 497-like [Bombyx mori]	--	--	--	--	--	--	--	--	--	Q8N184	290	1.0035e-26	Zinc finger protein 567 OS=Homo sapiens GN=ZNF567 PE=2 SV=3	PF00412//PF00096//PF06467	LIM domain//Zinc finger, C2H2 type//MYM-type Zinc finger with FCS sequence motif	--	--	GO:0008270//GO:0046872	zinc ion binding//metal ion binding	--	--	--	--
c74598_g1	417	--	--	--	--	--	--	--	--	--	--	--	--	--	--	--	--	--	--	--	--	--	--	--	--	--	--	--	--
c29356_g1	280	--	--	--	--	--	--	--	--	--	--	--	--	--	--	--	--	--	--	--	--	--	--	--	--	--	--	--	--
c62000_g1	217	512897445	XP_004924154.1	204	1.50829e-17	PREDICTED: uncharacterized protein LOC101742632 [Bombyx mori]	--	--	--	--	--	--	--	--	--	--	--	--	--	--	--	--	--	--	--	--	--	--	--
c57929_g1	224	--	--	--	--	--	--	--	--	--	--	--	--	--	--	--	--	--	--	--	--	--	--	--	--	--	--	--	--
c43561_g2	419	--	--	--	--	--	--	--	--	--	--	--	--	--	--	--	--	--	--	--	--	--	--	--	--	--	--	--	--
c45456_g2	1381	--	--	--	--	--	--	--	--	--	--	--	--	--	--	--	--	--	--	PF05817	Oligosaccharyltransferase subunit Ribophorin II	GO:0006487	protein N-linked glycosylation	--	--	GO:0016021//GO:0008250	integral component of membrane//oligosaccharyltransferase complex	--	--
c57885_g1	346	--	--	--	--	--	--	--	--	--	--	--	--	--	--	--	--	--	--	--	--	--	--	--	--	--	--	--	--
c13486_g1	279	--	--	--	--	--	--	--	--	--	--	--	--	--	--	--	--	--	--	--	--	--	--	--	--	--	--	--	--
c62858_g1	289	--	--	--	--	--	--	--	--	--	--	--	--	--	--	--	--	--	--	--	--	--	--	--	--	--	--	--	--
c53118_g1	933	512925554	XP_004930868.1	932	3.48724e-121	PREDICTED: tRNA pseudouridine(38/39) synthase-like [Bombyx mori]	--	--	--	--	--	K01855	PUS3, DEG1	tRNA pseudouridine38/39 synthase	http://www.genome.jp/dbget-bin/www_bget?ko:K01855	Q3SX07	618	2.54245e-74	tRNA pseudouridine(38/39) synthase OS=Bos taurus GN=PUS3 PE=2 SV=1	PF01416//PF01183	tRNA pseudouridine synthase//Glycosyl hydrolases family 25	GO:0016998//GO:0009253//GO:0009451//GO:0005975//GO:0001522	cell wall macromolecule catabolic process//peptidoglycan catabolic process//RNA modification//carbohydrate metabolic process//pseudouridine synthesis	GO:0003723//GO:0003796//GO:0009982	RNA binding//lysozyme activity//pseudouridine synthase activity	--	--	KOG2554	Pseudouridylate synthase
c36743_g1	285	--	--	--	--	--	--	--	--	--	--	--	--	--	--	--	--	--	--	--	--	--	--	--	--	--	--	--	--
c21468_g1	351	--	--	--	--	--	--	--	--	--	--	--	--	--	--	--	--	--	--	--	--	--	--	--	--	--	--	--	--
c27149_g1	359	--	--	--	--	--	--	--	--	--	--	--	--	--	--	--	--	--	--	--	--	--	--	--	--	--	--	--	--
c4733_g1	206	--	--	--	--	--	--	--	--	--	--	--	--	--	--	--	--	--	--	--	--	--	--	--	--	--	--	--	--
c77381_g1	512	--	--	--	--	--	--	--	--	--	--	--	--	--	--	--	--	--	--	--	--	--	--	--	--	--	--	--	--
c3699_g1	258	--	--	--	--	--	--	--	--	--	--	--	--	--	--	--	--	--	--	--	--	--	--	--	--	--	--	--	--
c48564_g5	261	--	--	--	--	--	--	--	--	--	--	--	--	--	--	--	--	--	--	--	--	--	--	--	--	--	--	--	--
c37764_g1	798	357619752	EHJ72205.1	389	1.25497e-38	putative Spectrin beta chain [Danaus plexippus]	--	--	--	--	--	--	--	--	--	--	--	--	--	--	--	--	--	--	--	--	--	--	--
c88994_g1	312	443724227	ELU12339.1	124	5.25053e-06	hypothetical protein CAPTEDRAFT_189484 [Capitella teleta]	--	--	--	--	--	--	--	--	--	--	--	--	--	--	--	--	--	--	--	--	--	--	--
c43208_g1	1019	512920157	XP_004929562.1	521	1.43535e-56	PREDICTED: nose resistant to fluoxetine protein 6-like [Bombyx mori]	--	--	--	--	--	--	--	--	--	--	--	--	--	--	--	--	--	--	--	--	--	--	--
c77503_g1	202	--	--	--	--	--	--	--	--	--	--	--	--	--	--	--	--	--	--	--	--	--	--	--	--	--	--	--	--
c34769_g1	1064	--	--	--	--	--	--	--	--	--	--	--	--	--	--	--	--	--	--	--	--	--	--	--	--	--	--	--	--
c52554_g1	1034	512932010	XP_004932440.1	1094	2.60591e-140	PREDICTED: uncharacterized protein LOC101738767 [Bombyx mori]	--	--	--	--	--	--	--	--	--	Q8VI24	166	2.89399e-11	DNA-binding protein SATB2 OS=Mus musculus GN=Satb2 PE=1 SV=1	--	--	--	--	--	--	--	--	--	--
c12254_g1	204	--	--	--	--	--	--	--	--	--	--	--	--	--	--	--	--	--	--	--	--	--	--	--	--	--	--	--	--
c73692_g1	215	317145194	XP_003189681.1	215	4.77665e-20	hypothetical protein AOR_1_2946154 [Aspergillus oryzae RIB40]	317145193	XM_003189633.1	169	7.6669e-82	Aspergillus oryzae RIB40 hypothetical protein, mRNA	--	--	--	--	--	--	--	--	--	--	--	--	--	--	--	--	--	--
c45406_g1	1383	--	--	--	--	--	--	--	--	--	--	--	--	--	--	--	--	--	--	--	--	--	--	--	--	--	--	--	--
c53107_g1	3395	357630904	EHJ78723.1	1195	9.60149e-144	hypothetical protein KGM_00713 [Danaus plexippus]	512894127	XM_004923300.1	327	2.07037e-168	PREDICTED: Bombyx mori splicing factor 3B subunit 2-like (LOC101742628), mRNA	K12829	SF3B2, SAP145, CUS1	splicing factor 3B subunit 2	http://www.genome.jp/dbget-bin/www_bget?ko:K12829	Q13435	809	3.04301e-90	Splicing factor 3B subunit 2 OS=Homo sapiens GN=SF3B2 PE=1 SV=2	PF00472//PF15306//PF07462//PF04037	RF-1 domain//LIN37//Merozoite surface protein 1 (MSP1) C-terminus//Domain of unknown function (DUF382)	GO:0006415//GO:0009405//GO:0007049//GO:0006449	translational termination//pathogenesis//cell cycle//regulation of translational termination	GO:0003747	translation release factor activity	GO:0017053//GO:0018444//GO:0005840//GO:0016020//GO:0005634	transcriptional repressor complex//translation release factor complex//ribosome//membrane//nucleus	KOG2330	Splicing factor 3b, subunit 2
c13717_g1	207	--	--	--	--	--	--	--	--	--	--	--	--	--	--	--	--	--	--	--	--	--	--	--	--	--	--	--	--
c76647_g1	341	--	--	--	--	--	--	--	--	--	--	--	--	--	--	--	--	--	--	PF05669	SOH1	GO:0006355	regulation of transcription, DNA-templated	GO:0001104	RNA polymerase II transcription cofactor activity	GO:0016592	mediator complex	--	--
c68938_g1	233	--	--	--	--	--	--	--	--	--	--	--	--	--	--	--	--	--	--	--	--	--	--	--	--	--	--	--	--
c55304_g2	715	--	--	--	--	--	--	--	--	--	--	--	--	--	--	--	--	--	--	--	--	--	--	--	--	--	--	--	--
c28704_g2	312	--	--	--	--	--	--	--	--	--	--	--	--	--	--	--	--	--	--	--	--	--	--	--	--	--	--	--	--
c80401_g1	250	--	--	--	--	--	--	--	--	--	--	--	--	--	--	--	--	--	--	--	--	--	--	--	--	--	--	--	--
c63498_g1	206	--	--	--	--	--	--	--	--	--	--	--	--	--	--	--	--	--	--	--	--	--	--	--	--	--	--	--	--
c12400_g1	328	--	--	--	--	--	--	--	--	--	--	--	--	--	--	--	--	--	--	--	--	--	--	--	--	--	--	--	--
c73854_g1	271	--	--	--	--	--	--	--	--	--	--	--	--	--	--	--	--	--	--	--	--	--	--	--	--	--	--	--	--
c54774_g5	4787	343481903	AEM44817.1	1554	0	unknown [Pectinophora gossypiella]	--	--	--	--	--	--	--	--	--	P21328	322	1.583e-28	RNA-directed DNA polymerase from mobile element jockey OS=Drosophila melanogaster GN=pol PE=1 SV=1	PF03615//PF04472//PF00078//PF07926//PF00628//PF00130	GCM motif protein//Protein of unknown function (DUF552)//Reverse transcriptase (RNA-dependent DNA polymerase)//TPR/MLP1/MLP2-like protein//PHD-finger//Phorbol esters/diacylglycerol binding domain (C1 domain)	GO:0000917//GO:0006606//GO:0006355//GO:0006278//GO:0035556	barrier septum assembly//protein import into nucleus//regulation of transcription, DNA-templated//RNA-dependent DNA replication//intracellular signal transduction	GO:0003677//GO:0005515//GO:0003964//GO:0003723	DNA binding//protein binding//RNA-directed DNA polymerase activity//RNA binding	GO:0005643	nuclear pore	KOG1075	FOG: Reverse transcriptase
c83895_g1	275	--	--	--	--	--	--	--	--	--	--	--	--	--	--	--	--	--	--	--	--	--	--	--	--	--	--	--	--
c45889_g1	2397	512901163	XP_004925068.1	2209	0	PREDICTED: BTB/POZ domain-containing protein 2-like [Bombyx mori]	532092720	XM_005331986.1	98	2.90851e-41	PREDICTED: Spermophilus tridecemlineatus BTB (POZ) domain containing 2 (Btbd2), mRNA	K10477	BTBD1_2	BTB/POZ domain-containing protein 1/2	http://www.genome.jp/dbget-bin/www_bget?ko:K10477	Q9BX70	1641	0	BTB/POZ domain-containing protein 2 OS=Homo sapiens GN=BTBD2 PE=1 SV=1	PF00651	BTB/POZ domain	--	--	GO:0005515	protein binding	--	--	KOG2075	Topoisomerase TOP1-interacting protein BTBD1
c16241_g1	421	--	--	--	--	--	--	--	--	--	--	--	--	--	--	--	--	--	--	--	--	--	--	--	--	--	--	--	--
c7330_g1	226	--	--	--	--	--	--	--	--	--	--	--	--	--	--	--	--	--	--	--	--	--	--	--	--	--	--	--	--
c19466_g1	234	--	--	--	--	--	--	--	--	--	--	--	--	--	--	--	--	--	--	--	--	--	--	--	--	--	--	--	--
c64030_g1	581	--	--	--	--	--	--	--	--	--	--	--	--	--	--	--	--	--	--	--	--	--	--	--	--	--	--	--	--
c87822_g1	233	--	--	--	--	--	--	--	--	--	--	--	--	--	--	--	--	--	--	--	--	--	--	--	--	--	--	--	--
c50649_g1	566	--	--	--	--	--	--	--	--	--	--	--	--	--	--	--	--	--	--	--	--	--	--	--	--	--	--	--	--
c47381_g1	1440	512929127	XP_004931747.1	1498	0	PREDICTED: short-chain dehydrogenase/reductase family 16C member 6-like isoform X1 [Bombyx mori]	--	--	--	--	--	K15734	SDR16C5	all-trans-retinol dehydrogenase (NAD+)	http://www.genome.jp/dbget-bin/www_bget?ko:K15734	Q8N3Y7	535	5.56453e-62	Epidermal retinol dehydrogenase 2 OS=Homo sapiens GN=SDR16C5 PE=2 SV=2	PF02826//PF02737//PF03446//PF03721//PF02558//PF00208//PF13241//PF01073//PF00070//PF01370//PF00106//PF03435//PF02719	D-isomer specific 2-hydroxyacid dehydrogenase, NAD binding domain//3-hydroxyacyl-CoA dehydrogenase, NAD binding domain//NAD binding domain of 6-phosphogluconate dehydrogenase//UDP-glucose/GDP-mannose dehydrogenase family, NAD binding domain//Ketopantoate reductase PanE/ApbA//Glutamate/Leucine/Phenylalanine/Valine dehydrogenase//Putative NAD(P)-binding//3-beta hydroxysteroid dehydrogenase/isomeras…	GO:0044237//GO:0008152//GO:0008207//GO:0019521//GO:0008209//GO:0006779//GO:0006568//GO:0055114//GO:0006631//GO:0006554//GO:0019354//GO:0006520//GO:0006098//GO:0006550//GO:0006633//GO:0008210//GO:0009058//GO:0006552//GO:0006574//GO:0006694//GO:0015940//GO:0018874	cellular metabolic process//metabolic process//C21-steroid hormone metabolic process//D-gluconate metabolic process//androgen metabolic process//porphyrin-containing compound biosynthetic process//tryptophan metabolic process//oxidation-reduction process//fatty acid metabolic process//lysine catabolic process//siroheme biosynthetic process//cellular amino acid metabolic process//pentose-phosphate…	GO:0016616//GO:0043115//GO:0008677//GO:0003854//GO:0048037//GO:0003857//GO:0050662//GO:0016491//GO:0051287//GO:0004616//GO:0050660//GO:0003824	oxidoreductase activity, acting on the CH-OH group of donors, NAD or NADP as acceptor//precorrin-2 dehydrogenase activity//2-dehydropantoate 2-reductase activity//3-beta-hydroxy-delta5-steroid dehydrogenase activity//cofactor binding//3-hydroxyacyl-CoA dehydrogenase activity//coenzyme binding//oxidoreductase activity//NAD binding//phosphogluconate dehydrogenase (decarboxylating) activity//flavin …	--	--	KOG1201	Hydroxysteroid 17-beta dehydrogenase 11
c23833_g1	319	--	--	--	--	--	--	--	--	--	--	--	--	--	--	--	--	--	--	--	--	--	--	--	--	--	--	--	--
c46243_g1	766	--	--	--	--	--	--	--	--	--	--	--	--	--	--	--	--	--	--	--	--	--	--	--	--	--	--	--	--
c16803_g1	269	--	--	--	--	--	--	--	--	--	--	--	--	--	--	--	--	--	--	--	--	--	--	--	--	--	--	--	--
c48634_g2	2195	--	--	--	--	--	--	--	--	--	--	--	--	--	--	--	--	--	--	--	--	--	--	--	--	--	--	--	--
c79684_g1	304	--	--	--	--	--	--	--	--	--	--	--	--	--	--	--	--	--	--	--	--	--	--	--	--	--	--	--	--
c84130_g1	251	--	--	--	--	--	--	--	--	--	--	--	--	--	--	--	--	--	--	--	--	--	--	--	--	--	--	--	--
c31865_g1	338	--	--	--	--	--	--	--	--	--	--	--	--	--	--	--	--	--	--	--	--	--	--	--	--	--	--	--	--
c48818_g1	1704	--	--	--	--	--	--	--	--	--	--	--	--	--	--	--	--	--	--	--	--	--	--	--	--	--	--	--	--
c7277_g1	210	--	--	--	--	--	--	--	--	--	--	--	--	--	--	--	--	--	--	--	--	--	--	--	--	--	--	--	--
c23456_g1	384	--	--	--	--	--	--	--	--	--	--	--	--	--	--	--	--	--	--	--	--	--	--	--	--	--	--	--	--
c11683_g1	479	--	--	--	--	--	--	--	--	--	--	--	--	--	--	--	--	--	--	--	--	--	--	--	--	--	--	--	--
c12059_g1	511	--	--	--	--	--	--	--	--	--	--	--	--	--	--	--	--	--	--	--	--	--	--	--	--	--	--	--	--
c35269_g1	443	--	--	--	--	--	--	--	--	--	--	--	--	--	--	--	--	--	--	--	--	--	--	--	--	--	--	--	--
c79428_g1	355	--	--	--	--	--	--	--	--	--	--	--	--	--	--	--	--	--	--	--	--	--	--	--	--	--	--	--	--
c83746_g1	236	--	--	--	--	--	--	--	--	--	--	--	--	--	--	--	--	--	--	--	--	--	--	--	--	--	--	--	--
c66412_g1	307	357614374	EHJ69041.1	494	2.54056e-57	hypothetical protein KGM_16554 [Danaus plexippus]	--	--	--	--	--	K12302	SLC17A6_7_8	MFS transporter, ACS family, solute carrier family 17 (sodium-dependent inorganic phosphate cotransporter), member 6/7/8	http://www.genome.jp/dbget-bin/www_bget?ko:K12302	Q8NDX2	301	1.70816e-31	Vesicular glutamate transporter 3 OS=Homo sapiens GN=SLC17A8 PE=1 SV=1	PF07690	Major Facilitator Superfamily	GO:0055085	transmembrane transport	--	--	GO:0016021	integral component of membrane	KOG2532	Permease of the major facilitator superfamily
c50387_g1	2800	401327	P31401.1	2623	0	RecName: Full=V-type proton ATPase subunit B; Short=V-ATPase subunit B; AltName: Full=Vacuolar proton pump subunit B [Manduca sexta] >gi|9714|emb|CAA45706.1| H(+)-transporting ATPase [Manduca sexta]	237458	S61797.1	1061	0	vacuolar (V-type) H(+)-ATPase B subunit [Helicoverpa virescens, fifth instar larvae, midgut and Malpighian tubules, mRNA, 2149 nt]	K02147	ATPeV1B, ATP6B	V-type H+-transporting ATPase subunit B	http://www.genome.jp/dbget-bin/www_bget?ko:K02147	P31401	2623	0	V-type proton ATPase subunit B OS=Manduca sexta GN=VHA55 PE=2 SV=1	PF00006//PF00306//PF02874	ATP synthase alpha/beta family, nucleotide-binding domain//ATP synthase alpha/beta chain, C terminal domain//ATP synthase alpha/beta family, beta-barrel domain	GO:0046034//GO:0015991//GO:0015992	ATP metabolic process//ATP hydrolysis coupled proton transport//proton transport	GO:0005524//GO:0016820	ATP binding//hydrolase activity, acting on acid anhydrides, catalyzing transmembrane movement of substances	GO:0033180//GO:0033178	proton-transporting V-type ATPase, V1 domain//proton-transporting two-sector ATPase complex, catalytic domain	KOG1351	Vacuolar H+-ATPase V1 sector, subunit B
c55131_g1	3088	512891448	XP_004922686.1	4076	0	PREDICTED: polycomb protein l(1)G0020-like [Bombyx mori]	--	--	--	--	--	K14521	NAT10, KRE33	N-acetyltransferase 10	http://www.genome.jp/dbget-bin/www_bget?ko:K14521	Q9W3C1	2716	0	Polycomb protein l(1)G0020 OS=Drosophila melanogaster GN=l(1)G0020 PE=1 SV=2	PF13718//PF00583//PF13508	GNAT acetyltransferase 2//Acetyltransferase (GNAT) family//Acetyltransferase (GNAT) domain	GO:0042967	acyl-carrier-protein biosynthetic process	GO:0008080	N-acetyltransferase activity	--	--	KOG2036	Predicted P-loop ATPase fused to an acetyltransferase
c73660_g1	569	--	--	--	--	--	--	--	--	--	--	--	--	--	--	--	--	--	--	--	--	--	--	--	--	--	--	--	--
c68005_g1	549	--	--	--	--	--	--	--	--	--	--	--	--	--	--	--	--	--	--	--	--	--	--	--	--	--	--	--	--
c7951_g1	475	646722646	KDR23577.1	286	8.06399e-28	Putative nuclease HARBI1 [Zootermopsis nevadensis]	--	--	--	--	--	--	--	--	--	--	--	--	--	--	--	--	--	--	--	--	--	--	--
c9585_g1	285	512914158	XP_004928072.1	130	8.77734e-07	PREDICTED: cytoplasmic dynein 2 heavy chain 1-like [Bombyx mori]	--	--	--	--	--	--	--	--	--	--	--	--	--	--	--	--	--	--	--	--	--	--	--
c83105_g1	313	390368013	XP_789467.3	184	1.03095e-13	PREDICTED: RNA-directed DNA polymerase from mobile element jockey-like [Strongylocentrotus purpuratus]	--	--	--	--	--	--	--	--	--	--	--	--	--	PF00078	Reverse transcriptase (RNA-dependent DNA polymerase)	GO:0006278	RNA-dependent DNA replication	GO:0003964//GO:0003723	RNA-directed DNA polymerase activity//RNA binding	--	--	--	--
c17444_g1	1177	--	--	--	--	--	--	--	--	--	--	--	--	--	--	--	--	--	--	--	--	--	--	--	--	--	--	--	--
c62068_g1	240	--	--	--	--	--	--	--	--	--	--	--	--	--	--	--	--	--	--	--	--	--	--	--	--	--	--	--	--
c37729_g1	902	--	--	--	--	--	--	--	--	--	--	--	--	--	--	--	--	--	--	--	--	--	--	--	--	--	--	--	--
c85403_g1	354	--	--	--	--	--	--	--	--	--	--	--	--	--	--	--	--	--	--	--	--	--	--	--	--	--	--	--	--
c86563_g1	544	--	--	--	--	--	--	--	--	--	--	--	--	--	--	--	--	--	--	--	--	--	--	--	--	--	--	--	--
c50029_g1	1105	--	--	--	--	--	--	--	--	--	--	--	--	--	--	--	--	--	--	--	--	--	--	--	--	--	--	--	--
c58511_g1	203	317150371	XP_003190416.1	242	3.33433e-25	hypothetical protein AOR_1_422094 [Aspergillus oryzae RIB40]	317150370	XM_003190368.1	166	3.33316e-80	Aspergillus oryzae RIB40 hypothetical protein, mRNA	--	--	--	--	--	--	--	--	PF07690	Major Facilitator Superfamily	GO:0055085	transmembrane transport	--	--	GO:0016021	integral component of membrane	--	--
c84519_g1	282	--	--	--	--	--	--	--	--	--	--	--	--	--	--	--	--	--	--	--	--	--	--	--	--	--	--	--	--
c17589_g1	546	--	--	--	--	--	185050673	AP009041.1	89	6.36631e-37	Bombyx mori genomic DNA, chromosome 18, BAC clone:556I11, complete sequence	--	--	--	--	--	--	--	--	--	--	--	--	--	--	--	--	--	--
c20372_g1	262	--	--	--	--	--	--	--	--	--	--	--	--	--	--	--	--	--	--	--	--	--	--	--	--	--	--	--	--
c55327_g3	1130	357624391	EHJ75178.1	154	1.66853e-09	reverse transcriptase [Danaus plexippus]	345548869	JF339040.1	76	2.29133e-29	Ostrinia nubilalis aminopeptidase N3b (apn3b) gene, partial cds; and aminopeptidase N3a (apn3a) and aminopeptidase N3c (apn3c) genes, complete cds	--	--	--	--	--	--	--	--	PF00856	SET domain	--	--	GO:0005515	protein binding	--	--	--	--
c7772_g1	278	--	--	--	--	--	--	--	--	--	--	--	--	--	--	--	--	--	--	--	--	--	--	--	--	--	--	--	--
c37642_g1	236	--	--	--	--	--	--	--	--	--	--	--	--	--	--	--	--	--	--	--	--	--	--	--	--	--	--	--	--
c17353_g1	411	357603715	EHJ63893.1	432	6.56654e-51	hypothetical protein KGM_16919 [Danaus plexippus]	432856211	XM_004068360.1	57	2.88379e-19	PREDICTED: Oryzias latipes ras-related protein Rab-8A-like (LOC101161304), mRNA	K07902	RAB8B	Ras-related protein Rab-8B	http://www.genome.jp/dbget-bin/www_bget?ko:K07902	Q05974	275	5.4997e-29	Ras-related protein Rab-1A OS=Lymnaea stagnalis GN=RAB1A PE=2 SV=1	PF04670//PF00735//PF00071//PF00025//PF01926//PF08477	Gtr1/RagA G protein conserved region//Septin//Ras family//ADP-ribosylation factor family//50S ribosome-binding GTPase//Miro-like protein	GO:0007049//GO:0007264//GO:0015031	cell cycle//small GTPase mediated signal transduction//protein transport	GO:0005525	GTP binding	GO:0005634//GO:0005737//GO:0005622	nucleus//cytoplasm//intracellular	KOG0078	GTP-binding protein SEC4, small G protein superfamily, and related Ras family GTP-binding proteins
c32935_g1	1449	34392535	BAC82595.1	986	7.56501e-118	reverse transcriptase [Anopheles gambiae]	--	--	--	--	--	--	--	--	--	--	--	--	--	PF05822	Pyrimidine 5'-nucleotidase (UMPH-1)	--	--	GO:0008253//GO:0000287	5'-nucleotidase activity//magnesium ion binding	GO:0005737	cytoplasm	--	--
c76362_g1	213	--	--	--	--	--	--	--	--	--	--	--	--	--	--	--	--	--	--	--	--	--	--	--	--	--	--	--	--
c32789_g1	355	--	--	--	--	--	--	--	--	--	--	--	--	--	--	--	--	--	--	PF11722	CCCH zinc finger in TRM13 protein	--	--	GO:0008168	methyltransferase activity	--	--	--	--
c48053_g1	620	--	--	--	--	--	--	--	--	--	--	--	--	--	--	--	--	--	--	--	--	--	--	--	--	--	--	--	--
c44437_g1	2343	523587998	AGQ53952.1	2082	0	enolase [Spodoptera litura]	440211360	JQ789677.1	1111	0	Ostrinia furnacalis voucher Osfu putative enolase protein mRNA, partial cds	K01689	ENO, eno	enolase	http://www.genome.jp/dbget-bin/www_bget?ko:K01689	P15007	1858	0	Enolase OS=Drosophila melanogaster GN=Eno PE=1 SV=2	PF00113//PF03952	Enolase, C-terminal TIM barrel domain//Enolase, N-terminal domain	GO:0000162//GO:0009094//GO:0006094//GO:0006571//GO:0006096	tryptophan biosynthetic process//L-phenylalanine biosynthetic process//gluconeogenesis//tyrosine biosynthetic process//glycolytic process	GO:0000287//GO:0004634	magnesium ion binding//phosphopyruvate hydratase activity	GO:0000015	phosphopyruvate hydratase complex	KOG2670	Enolase
c4006_g1	697	512935694	XP_004933336.1	154	5.69473e-10	PREDICTED: chorion class CB protein M5H4-like [Bombyx mori]	--	--	--	--	--	--	--	--	--	P08830	144	3.73788e-10	Chorion class CB protein M5H4 OS=Bombyx mori PE=2 SV=2	--	--	--	--	--	--	--	--	--	--
c36229_g2	2002	270012963	EFA09411.1	154	7.34924e-08	hypothetical protein TcasGA2_TC005213 [Tribolium castaneum]	--	--	--	--	--	--	--	--	--	--	--	--	--	PF02891//PF00130//PF04810//PF13639	MIZ/SP-RING zinc finger//Phorbol esters/diacylglycerol binding domain (C1 domain)//Sec23/Sec24 zinc finger//Ring finger domain	GO:0006886//GO:0006888//GO:0035556	intracellular protein transport//ER to Golgi vesicle-mediated transport//intracellular signal transduction	GO:0005515//GO:0008270	protein binding//zinc ion binding	GO:0030127	COPII vesicle coat	--	--
c69999_g1	388	--	--	--	--	--	--	--	--	--	--	--	--	--	--	--	--	--	--	--	--	--	--	--	--	--	--	--	--
c74017_g1	384	--	--	--	--	--	--	--	--	--	--	--	--	--	--	--	--	--	--	--	--	--	--	--	--	--	--	--	--
c562_g1	232	--	--	--	--	--	--	--	--	--	--	--	--	--	--	--	--	--	--	--	--	--	--	--	--	--	--	--	--
c74209_g1	202	--	--	--	--	--	--	--	--	--	--	--	--	--	--	--	--	--	--	--	--	--	--	--	--	--	--	--	--
c51056_g1	2382	512931447	XP_004932305.1	2617	0	PREDICTED: sec1 family domain-containing protein 2-like [Bombyx mori]	--	--	--	--	--	--	--	--	--	Q8BTY8	649	8.04554e-72	Sec1 family domain-containing protein 2 OS=Mus musculus GN=Scfd2 PE=2 SV=1	PF00995	Sec1 family	GO:0016192//GO:0006904	vesicle-mediated transport//vesicle docking involved in exocytosis	--	--	--	--	--	--
c6943_g1	289	357610918	EHJ67211.1	157	5.07421e-15	hypothetical protein KGM_13805 [Danaus plexippus]	--	--	--	--	--	--	--	--	--	--	--	--	--	--	--	--	--	GO:0003676//GO:0000166	nucleic acid binding//nucleotide binding	--	--	--	--
c76708_g1	265	--	--	--	--	--	--	--	--	--	--	--	--	--	--	--	--	--	--	--	--	--	--	--	--	--	--	--	--
c78534_g1	357	--	--	--	--	--	--	--	--	--	--	--	--	--	--	--	--	--	--	--	--	--	--	--	--	--	--	--	--
c52045_g6	331	--	--	--	--	--	--	--	--	--	--	--	--	--	--	--	--	--	--	--	--	--	--	--	--	--	--	--	--
c23174_g1	270	--	--	--	--	--	--	--	--	--	--	--	--	--	--	--	--	--	--	--	--	--	--	--	--	--	--	--	--
c24355_g1	523	--	--	--	--	--	--	--	--	--	--	--	--	--	--	--	--	--	--	--	--	--	--	--	--	--	--	--	--
c15243_g1	993	--	--	--	--	--	--	--	--	--	--	--	--	--	--	--	--	--	--	--	--	--	--	--	--	--	--	--	--
c31888_g1	369	--	--	--	--	--	--	--	--	--	--	--	--	--	--	--	--	--	--	--	--	--	--	--	--	--	--	--	--
c37190_g1	649	--	--	--	--	--	--	--	--	--	--	--	--	--	--	--	--	--	--	--	--	--	--	--	--	--	--	--	--
c76049_g1	202	--	--	--	--	--	--	--	--	--	--	--	--	--	--	--	--	--	--	--	--	--	--	--	--	--	--	--	--
c73508_g1	263	512911024	XP_004927314.1	260	3.80099e-24	PREDICTED: uncharacterized protein LOC101746849 [Bombyx mori]	--	--	--	--	--	--	--	--	--	--	--	--	--	--	--	--	--	--	--	--	--	--	--
c85355_g1	229	--	--	--	--	--	--	--	--	--	--	--	--	--	--	--	--	--	--	--	--	--	--	--	--	--	--	--	--
c88235_g1	213	--	--	--	--	--	--	--	--	--	--	--	--	--	--	--	--	--	--	--	--	--	--	--	--	--	--	--	--
c772_g1	1213	585711308	XP_006824720.1	263	2.42582e-22	PREDICTED: RNA-directed DNA polymerase from mobile element jockey-like, partial [Saccoglossus kowalevskii]	--	--	--	--	--	--	--	--	--	--	--	--	--	--	--	--	--	--	--	--	--	--	--
c25290_g1	1356	357624051	EHJ74956.1	1048	1.77197e-137	hypothetical protein KGM_12920 [Danaus plexippus]	440206978	JQ787486.1	250	5.19327e-126	Evergestis funalis voucher Esub nucleolar cysteine-rich protein mRNA, partial cds	--	--	--	--	Q9VAU9	931	2.93305e-121	Zinc finger protein 330 homolog OS=Drosophila melanogaster GN=Noa36 PE=1 SV=1	PF06524	NOA36 protein	--	--	GO:0008270	zinc ion binding	GO:0005634	nucleus	--	--
c55082_g1	5005	512911016	XP_004927312.1	4213	0	PREDICTED: serine/threonine-protein kinase/endoribonuclease IRE1-like [Bombyx mori]	512911015	XM_004927255.1	680	0	PREDICTED: Bombyx mori serine/threonine-protein kinase/endoribonuclease IRE1-like (LOC101746571), mRNA	K08852	ERN1	serine/threonine-protein kinase/endoribonuclease IRE1	http://www.genome.jp/dbget-bin/www_bget?ko:K08852	Q76MJ5	1425	7.06926e-173	Serine/threonine-protein kinase/endoribonuclease IRE2 OS=Homo sapiens GN=ERN2 PE=1 SV=4	PF07714//PF00069//PF06479	Protein tyrosine kinase//Protein kinase domain//Ribonuclease 2-5A	GO:0006468//GO:0006397//GO:0051252	protein phosphorylation//mRNA processing//regulation of RNA metabolic process	GO:0005524//GO:0004672//GO:0004540	ATP binding//protein kinase activity//ribonuclease activity	--	--	KOG1027	Serine/threonine protein kinase and endoribonuclease ERN1/IRE1, sensor of the unfolded protein response pathway
c26455_g1	280	--	--	--	--	--	--	--	--	--	--	--	--	--	--	--	--	--	--	--	--	--	--	--	--	--	--	--	--
c54287_g1	872	527209896	EPS74505.1	190	2.31988e-28	hypothetical protein M569_00222, partial [Genlisea aurea]	385343160	JQ283179.1	749	0	Uncultured bacterium clone Sass_faecal-67 16S ribosomal RNA gene, partial sequence	--	--	--	--	--	--	--	--	--	--	--	--	--	--	--	--	--	--
c54319_g2	1012	270002198	EEZ98645.1	416	7.94946e-46	hypothetical protein TcasGA2_TC001173 [Tribolium castaneum]	--	--	--	--	--	K15141	MED28	mediator of RNA polymerase II transcription subunit 28	http://www.genome.jp/dbget-bin/www_bget?ko:K15141	Q17P98	330	4.90993e-35	Mediator of RNA polymerase II transcription subunit 28 OS=Aedes aegypti GN=MED28 PE=3 SV=1	--	--	--	--	--	--	--	--	--	--
c49335_g1	806	--	--	--	--	--	--	--	--	--	--	--	--	--	--	--	--	--	--	--	--	--	--	--	--	--	--	--	--
c18100_g1	261	--	--	--	--	--	--	--	--	--	--	--	--	--	--	--	--	--	--	--	--	--	--	--	--	--	--	--	--
c370_g1	361	--	--	--	--	--	--	--	--	--	--	--	--	--	--	--	--	--	--	--	--	--	--	--	--	--	--	--	--
c24477_g1	763	--	--	--	--	--	--	--	--	--	--	--	--	--	--	--	--	--	--	--	--	--	--	--	--	--	--	--	--
c52664_g1	5032	157344	AAA28508.1	1939	0	reverse transcriptase (put.); putative [Drosophila melanogaster]	--	--	--	--	--	--	--	--	--	Q9NBX4	1662	0	Probable RNA-directed DNA polymerase from transposon X-element OS=Drosophila melanogaster GN=X-element\ORF2 PE=3 SV=1	PF00078//PF00649//PF00098//PF06668	Reverse transcriptase (RNA-dependent DNA polymerase)//Copper fist DNA binding domain//Zinc knuckle//Inter-alpha-trypsin inhibitor heavy chain C-terminus	GO:0006355//GO:0006278//GO:0030212	regulation of transcription, DNA-templated//RNA-dependent DNA replication//hyaluronan metabolic process	GO:0003700//GO:0008270//GO:0003677//GO:0005507//GO:0003676//GO:0003723//GO:0004867//GO:0003964	sequence-specific DNA binding transcription factor activity//zinc ion binding//DNA binding//copper ion binding//nucleic acid binding//RNA binding//serine-type endopeptidase inhibitor activity//RNA-directed DNA polymerase activity	GO:0005634//GO:0005667	nucleus//transcription factor complex	KOG1075	FOG: Reverse transcriptase
c13720_g1	895	--	--	--	--	--	--	--	--	--	--	--	--	--	--	--	--	--	--	--	--	--	--	--	--	--	--	--	--
c65963_g1	243	270002655	EEZ99102.1	254	1.57929e-23	hypothetical protein TcasGA2_TC004995 [Tribolium castaneum]	--	--	--	--	--	--	--	--	--	P0CT40	155	1.01286e-11	Transposon Tf2-9 polyprotein OS=Schizosaccharomyces pombe (strain 972 / ATCC 24843) GN=Tf2-9 PE=3 SV=1	--	--	--	--	--	--	--	--	KOG0017	FOG: Transposon-encoded proteins with TYA, reverse transcriptase, integrase domains in various combinations
c63657_g1	236	--	--	--	--	--	--	--	--	--	--	--	--	--	--	--	--	--	--	--	--	--	--	--	--	--	--	--	--
c42974_g1	2800	357624962	EHJ75537.1	2042	0	hypothetical protein KGM_19377 [Danaus plexippus]	--	--	--	--	--	--	--	--	--	Q09225	567	1.00576e-59	Nose resistant to fluoxetine protein 6 OS=Caenorhabditis elegans GN=nrf-6 PE=1 SV=3	PF01757	Acyltransferase family	--	--	GO:0016747	transferase activity, transferring acyl groups other than amino-acyl groups	--	--	KOG3700	Predicted acyltransferase
c59561_g1	326	--	--	--	--	--	--	--	--	--	--	--	--	--	--	--	--	--	--	--	--	--	--	--	--	--	--	--	--
c48442_g4	527	--	--	--	--	--	--	--	--	--	--	--	--	--	--	--	--	--	--	--	--	--	--	--	--	--	--	--	--
c66448_g1	250	357617924	EHJ71071.1	171	1.83156e-13	cuticular protein RR-1 motif 52 [Danaus plexippus]	--	--	--	--	--	--	--	--	--	--	--	--	--	--	--	--	--	--	--	--	--	--	--
c67891_g1	465	--	--	--	--	--	--	--	--	--	--	--	--	--	--	--	--	--	--	--	--	--	--	--	--	--	--	--	--
c35095_g1	204	--	--	--	--	--	--	--	--	--	--	--	--	--	--	--	--	--	--	--	--	--	--	--	--	--	--	--	--
c1986_g1	318	--	--	--	--	--	--	--	--	--	--	--	--	--	--	--	--	--	--	--	--	--	--	--	--	--	--	--	--
c59480_g1	546	--	--	--	--	--	--	--	--	--	--	--	--	--	--	--	--	--	--	--	--	--	--	--	--	--	--	--	--
c16062_g1	267	--	--	--	--	--	--	--	--	--	--	--	--	--	--	--	--	--	--	--	--	--	--	--	--	--	--	--	--
c62620_g1	434	512914127	XP_004928064.1	224	6.08327e-19	PREDICTED: myosin-G heavy chain-like [Bombyx mori]	--	--	--	--	--	--	--	--	--	--	--	--	--	--	--	--	--	--	--	--	--	--	--
c41147_g1	557	357617703	EHJ70943.1	637	3.67644e-74	2-oxoglutarate dehydrogenase [Danaus plexippus]	--	--	--	--	--	K00164	OGDH, sucA	2-oxoglutarate dehydrogenase E1 component	http://www.genome.jp/dbget-bin/www_bget?ko:K00164	Q60HE2	366	2.07769e-38	2-oxoglutarate dehydrogenase, mitochondrial OS=Macaca fascicularis GN=OGDH PE=2 SV=1	--	--	GO:0006554//GO:0006568//GO:0006099	lysine catabolic process//tryptophan metabolic process//tricarboxylic acid cycle	GO:0004591//GO:0030976	oxoglutarate dehydrogenase (succinyl-transferring) activity//thiamine pyrophosphate binding	GO:0045252	oxoglutarate dehydrogenase complex	KOG0450	2-oxoglutarate dehydrogenase, E1 subunit
c78305_g1	776	--	--	--	--	--	619325813	FO681370.1	35	9.60406e-07	Spodoptera frugiperda sequence from BAC clone 74M02	--	--	--	--	--	--	--	--	--	--	--	--	--	--	--	--	--	--
c42092_g2	759	--	--	--	--	--	--	--	--	--	--	--	--	--	--	--	--	--	--	--	--	--	--	--	--	--	--	--	--
c53488_g1	2357	190341030	NP_001121786.1	1845	0	alpha-esterase 3 precursor [Bombyx mori] >gi|189172237|gb|ACD80423.1| carboxylesterase CarE-14 [Bombyx mori]	--	--	--	--	--	--	--	--	--	B2D0J5	530	1.03668e-56	Venom carboxylesterase-6 OS=Apis mellifera PE=2 SV=1	PF07859//PF09026//PF02173	alpha/beta hydrolase fold//Centromere protein B dimerisation domain//pKID domain	GO:0006355//GO:0008152	regulation of transcription, DNA-templated//metabolic process	GO:0005515//GO:0003682//GO:0003677//GO:0016787	protein binding//chromatin binding//DNA binding//hydrolase activity	GO:0005634//GO:0000775//GO:0000785	nucleus//chromosome, centromeric region//chromatin	KOG1516	Carboxylesterase and related proteins
c35839_g1	840	--	--	--	--	--	--	--	--	--	--	--	--	--	--	--	--	--	--	PF05715	Piccolo Zn-finger	--	--	GO:0046872	metal ion binding	GO:0045202	synapse	--	--
c64298_g1	227	512921945	XP_004929998.1	210	9.26539e-19	PREDICTED: protein lyl-1-like [Bombyx mori]	194746286	XM_001955576.1	41	1.16684e-10	Drosophila ananassae GF18852 (Dana\GF18852), mRNA	--	--	--	--	--	--	--	--	--	--	--	--	--	--	--	--	--	--
c9882_g1	507	--	--	--	--	--	--	--	--	--	--	--	--	--	--	--	--	--	--	PF04057	Replication factor-A protein 1, N-terminal domain	GO:0006260	DNA replication	GO:0003677	DNA binding	GO:0005634	nucleus	--	--
c36635_g1	275	357608385	EHJ65964.1	160	3.3922e-12	hypothetical protein KGM_15853 [Danaus plexippus]	133930723	EF125924.1	38	6.76509e-09	Ostrinia furnacalis desaturase (D14-2) gene, partial cds	--	--	--	--	--	--	--	--	PF05408	Foot-and-mouth virus L-proteinase	GO:0016032//GO:0006508//GO:0019082	viral process//proteolysis//viral protein processing	GO:0004197	cysteine-type endopeptidase activity	--	--	--	--
c21983_g1	409	--	--	--	--	--	--	--	--	--	--	--	--	--	--	--	--	--	--	--	--	--	--	--	--	--	--	--	--
c80698_g1	277	--	--	--	--	--	--	--	--	--	--	--	--	--	--	--	--	--	--	--	--	--	--	--	--	--	--	--	--
c61584_g1	353	--	--	--	--	--	--	--	--	--	--	--	--	--	--	--	--	--	--	--	--	--	--	--	--	--	--	--	--
c4592_g1	286	--	--	--	--	--	--	--	--	--	--	--	--	--	--	--	--	--	--	--	--	--	--	--	--	--	--	--	--
c53892_g1	4340	357616642	EHJ70299.1	1549	0	hypothetical protein KGM_17477 [Danaus plexippus]	--	--	--	--	--	--	--	--	--	Q09506	342	6.37024e-35	Uncharacterized protein C45G9.7 OS=Caenorhabditis elegans GN=C45G9.7 PE=1 SV=1	PF13180//PF09572//PF00595//PF01601	PDZ domain//XamI restriction endonuclease//PDZ domain (Also known as DHR or GLGF)//Coronavirus S2 glycoprotein	GO:0046813//GO:0061025//GO:0009307//GO:0006308	receptor-mediated virion attachment to host cell//membrane fusion//DNA restriction-modification system//DNA catabolic process	GO:0005515//GO:0003677//GO:0009036	protein binding//DNA binding//Type II site-specific deoxyribonuclease activity	GO:0019031//GO:0016021//GO:0009359	viral envelope//integral component of membrane//Type II site-specific deoxyribonuclease complex	KOG3553	Tax interaction protein TIP1
c52384_g1	3209	--	--	--	--	--	--	--	--	--	--	--	--	--	--	--	--	--	--	--	--	--	--	--	--	--	--	--	--
c53673_g1	1934	350412776	XP_003489758.1	150	6.19646e-09	PREDICTED: dr1-associated corepressor-like [Bombus impatiens]	584054306	XM_006771696.1	43	8.77499e-11	PREDICTED: Myotis davidii DR1-associated protein 1 (negative cofactor 2 alpha) (DRAP1), partial mRNA	--	--	--	--	--	--	--	--	PF00808	Histone-like transcription factor (CBF/NF-Y) and archaeal histone	--	--	GO:0043565	sequence-specific DNA binding	GO:0005622	intracellular	KOG1659	Class 2 transcription repressor NC2, alpha subunit (DRAP1)
c87402_g1	216	--	--	--	--	--	--	--	--	--	--	--	--	--	--	--	--	--	--	--	--	--	--	--	--	--	--	--	--
c27376_g1	495	--	--	--	--	--	--	--	--	--	--	--	--	--	--	--	--	--	--	--	--	--	--	--	--	--	--	--	--
c46137_g1	1900	--	--	--	--	--	193237697	AB439130.1	70	8.43691e-26	Bombyx mori gene for tRNA-Val3, strain: Daizo	--	--	--	--	--	--	--	--	--	--	--	--	--	--	--	--	--	--
c83475_g1	221	--	--	--	--	--	--	--	--	--	--	--	--	--	--	--	--	--	--	--	--	--	--	--	--	--	--	--	--
c16350_g1	246	--	--	--	--	--	--	--	--	--	--	--	--	--	--	--	--	--	--	--	--	--	--	--	--	--	--	--	--
c81813_g1	280	--	--	--	--	--	--	--	--	--	--	--	--	--	--	--	--	--	--	--	--	--	--	--	--	--	--	--	--
c48984_g1	1003	357609373	EHJ66415.1	1061	1.00076e-138	putative UNC93A protein [Danaus plexippus]	--	--	--	--	--	--	--	--	--	Q9Y115	509	1.46849e-57	UNC93-like protein OS=Drosophila melanogaster GN=CG4928 PE=2 SV=1	--	--	--	--	--	--	--	--	KOG3097	Predicted membrane protein
c37560_g1	1208	357607726	EHJ65657.1	622	1.3793e-74	hypothetical protein KGM_06525 [Danaus plexippus]	--	--	--	--	--	--	--	--	--	--	--	--	--	--	--	--	--	--	--	--	--	--	--
c39059_g1	537	617453534	XP_007569450.1	260	8.83166e-24	PREDICTED: zinc finger protein OZF-like [Poecilia formosa]	--	--	--	--	--	K09228	KRAB	KRAB domain-containing zinc finger protein	http://www.genome.jp/dbget-bin/www_bget?ko:K09228	P18729	237	1.93227e-22	Gastrula zinc finger protein XlCGF57.1 (Fragment) OS=Xenopus laevis PE=3 SV=1	PF02892//PF00096	BED zinc finger//Zinc finger, C2H2 type	--	--	GO:0046872//GO:0003677	metal ion binding//DNA binding	--	--	KOG2461	Transcription factor BLIMP-1/PRDI-BF1, contains C2H2-type Zn-finger and SET domains
c3687_g1	221	--	--	--	--	--	--	--	--	--	--	--	--	--	--	--	--	--	--	--	--	--	--	--	--	--	--	--	--
c28012_g2	209	--	--	--	--	--	--	--	--	--	--	--	--	--	--	--	--	--	--	--	--	--	--	--	--	--	--	--	--
c78042_g1	224	--	--	--	--	--	--	--	--	--	--	--	--	--	--	--	--	--	--	--	--	--	--	--	--	--	--	--	--
c49154_g1	1283	--	--	--	--	--	--	--	--	--	--	--	--	--	--	--	--	--	--	--	--	--	--	--	--	--	--	--	--
c40035_g1	657	--	--	--	--	--	--	--	--	--	--	--	--	--	--	--	--	--	--	--	--	--	--	--	--	--	--	--	--
c41875_g2	1358	--	--	--	--	--	--	--	--	--	--	--	--	--	--	--	--	--	--	--	--	--	--	--	--	--	--	--	--
c61229_g1	263	--	--	--	--	--	--	--	--	--	--	--	--	--	--	--	--	--	--	--	--	--	--	--	--	--	--	--	--
c41148_g1	344	--	--	--	--	--	--	--	--	--	--	--	--	--	--	--	--	--	--	--	--	--	--	--	--	--	--	--	--
c60693_g1	205	--	--	--	--	--	--	--	--	--	--	--	--	--	--	--	--	--	--	--	--	--	--	--	--	--	--	--	--
c10420_g1	1042	--	--	--	--	--	--	--	--	--	--	--	--	--	--	--	--	--	--	--	--	--	--	--	--	--	--	--	--
c33703_g1	540	646712581	KDR17302.1	160	1.39852e-11	hypothetical protein L798_08501, partial [Zootermopsis nevadensis] >gi|646722844|gb|KDR23697.1| hypothetical protein L798_11173, partial [Zootermopsis nevadensis]	--	--	--	--	--	--	--	--	--	--	--	--	--	PF02939	UcrQ family	GO:0006118//GO:0015992//GO:0006119	electron transport//proton transport//oxidative phosphorylation	GO:0008121	ubiquinol-cytochrome-c reductase activity	--	--	--	--
c35738_g1	453	--	--	--	--	--	--	--	--	--	--	--	--	--	--	--	--	--	--	--	--	--	--	--	--	--	--	--	--
c78081_g1	224	--	--	--	--	--	--	--	--	--	--	--	--	--	--	--	--	--	--	--	--	--	--	--	--	--	--	--	--
[truncated: 79,532 more rows]

## Sheet: Table S5
Table S5. Annotation statistics of unigenes
Item	Number of Unigenes	Percentage (%)
Annotated in NR	19377	23.78
Annotated in NT	6651	8.16
Annotated in KO	6387	7.83
Annotated in SwissProt	12461	15.29
Annotated in PFAM	15729	19.3
Annotated in GO	16703	20.5
Annotated in KOG	9427	11.57
Annotated in all Databases	2723	3.34
Annotated in at least one Database	23399	28.72
Total Unigenes	81467	100
